# Supplementary material
Source: publisher figshare collection journal article supplement (https://acs.figshare.com/ndownloader/files/3763891)
Supplement: Supplementary file 1 [file 3763891]

 
data_uvic1409a
_publ_section_title           UVic1409

_publ_contact_author_name     'Jun Chen'

_publ_contact_author_address  
'Department of Chemsitry, University of Victoria, B.C.'

_publ_contact_author_email    junchen@uvic.ca

_publ_contact_author_phone    ?
  
_audit_creation_method            'SHELXL-2014/7'
_shelx_SHELXL_version_number      '2014/7'
_chemical_name_systematic         ?
_chemical_name_common             ?
_chemical_melting_point           ?
_chemical_formula_moiety          
 'C20 H28 O8' 
_chemical_formula_sum
 'C20 H28 O8' 
_chemical_formula_weight          396.42

loop_
 _atom_type_symbol
 _atom_type_description
 _atom_type_scat_dispersion_real
 _atom_type_scat_dispersion_imag
 _atom_type_scat_source
 'C'  'C'   0.0181   0.0091
 'International Tables Vol C Tables 4.2.6.8 and 6.1.1.4'
 'H'  'H'   0.0000   0.0000
 'International Tables Vol C Tables 4.2.6.8 and 6.1.1.4'
 'O'  'O'   0.0492   0.0322
 'International Tables Vol C Tables 4.2.6.8 and 6.1.1.4'
 
_space_group_crystal_system       monoclinic
_space_group_IT_number            14
_space_group_name_H-M_alt         'P 21/n'
_space_group_name_Hall            '-P 2yn'
 
_shelx_space_group_comment
;
The symmetry employed for this shelxl refinement is uniquely defined
by the following loop, which should always be used as a source of
symmetry information in preference to the above space-group names.
They are only intended as comments.
;
 
loop_
 _space_group_symop_operation_xyz
 'x, y, z'
 '-x+1/2, y+1/2, -z+1/2'
 '-x, -y, -z'
 'x-1/2, -y-1/2, z-1/2'
 
_cell_length_a                    6.7876(2)
_cell_length_b                    21.2855(5)
_cell_length_c                    13.9033(4)
_cell_angle_alpha                 90
_cell_angle_beta                  94.6000(14)
_cell_angle_gamma                 90
_cell_volume                      2002.24(10)
_cell_formula_units_Z             4
_cell_measurement_temperature     120(2)
_cell_measurement_reflns_used     9929
_cell_measurement_theta_min       3.80
_cell_measurement_theta_max       71.55
 
_exptl_crystal_description        tablet
_exptl_crystal_colour             colorless
_exptl_crystal_density_meas       ?
_exptl_crystal_density_method     ?
_exptl_crystal_density_diffrn     1.315          
_exptl_crystal_F_000              848
_exptl_transmission_factor_min    ?
_exptl_transmission_factor_max    ?
_exptl_crystal_size_max           0.151
_exptl_crystal_size_mid           0.082
_exptl_crystal_size_min           0.035
_exptl_absorpt_coefficient_mu     0.849
_shelx_estimated_absorpt_T_min    0.883
_shelx_estimated_absorpt_T_max    0.971
_exptl_absorpt_correction_type    numerical
_exptl_absorpt_correction_T_min   0.8772
_exptl_absorpt_correction_T_max   1.0000
_exptl_absorpt_process_details    'SADABS (Sheldrick, 2014)'
_exptl_absorpt_special_details    ?
_diffrn_ambient_temperature       120(2)
_diffrn_radiation_wavelength      1.54184
_diffrn_radiation_type            CuK\a
_diffrn_source                    'Incoatec micro-focus'                        
_diffrn_source_monochromator      'MONTEL Multi-layer'        
_diffrn_measurement_device_type   'Bruker APEX-II' 
_diffrn_measurement_method        
'combination of \w and \f-scans ' 
_diffrn_detector_area_resol_mean   8.33 
_diffrn_reflns_number             39788
_diffrn_reflns_av_unetI/netI      0.0171
_diffrn_reflns_av_R_equivalents   0.0391
_diffrn_reflns_limit_h_min        -8
_diffrn_reflns_limit_h_max        7
_diffrn_reflns_limit_k_min        -26
_diffrn_reflns_limit_k_max        26
_diffrn_reflns_limit_l_min        -16
_diffrn_reflns_limit_l_max        17
_diffrn_reflns_theta_min          3.806
_diffrn_reflns_theta_max          71.860
_diffrn_reflns_theta_full         67.679
_diffrn_measured_fraction_theta_max   0.983
_diffrn_measured_fraction_theta_full  0.994
_diffrn_reflns_Laue_measured_fraction_max    0.983
_diffrn_reflns_Laue_measured_fraction_full   0.994
_diffrn_reflns_point_group_measured_fraction_max   0.983
_diffrn_reflns_point_group_measured_fraction_full  0.994
_reflns_number_total              3869
_reflns_number_gt                 3492
_reflns_threshold_expression      'I > 2\s(I)'
_reflns_Friedel_coverage          0.000
_reflns_Friedel_fraction_max      .
_reflns_Friedel_fraction_full     .
 
_reflns_special_details
;
 Reflections were merged by SHELXL according to the crystal
 class for the calculation of statistics and refinement.
 
 _reflns_Friedel_fraction is defined as the number of unique
 Friedel pairs measured divided by the number that would be
 possible theoretically, ignoring centric projections and
 systematic absences.
;
 
_computing_data_collection        'Bruker APEX-II v2014-5.0' 
_computing_cell_refinement        'Bruker SAINT v8.34A' 
_computing_data_reduction         'Bruker SAINT v8.34A' 
_computing_structure_solution     'SHELXT-2014/2 (Sheldrick, 2014)' 
_computing_structure_refinement   'SHELXL-2014/7 (Sheldrick, 2014)'
_computing_molecular_graphics     'Bruker XP'
_computing_publication_material   'CIFTAB (Sheldrick, 2008)'
_refine_special_details           ?
_refine_ls_structure_factor_coef  Fsqd
_refine_ls_matrix_type            full
_refine_ls_weighting_scheme       calc
_refine_ls_weighting_details
'w=1/[\s^2^(Fo^2^)+(0.0473P)^2^+0.9611P] where P=(Fo^2^+2Fc^2^)/3'
_atom_sites_solution_primary      vecmap
_atom_sites_solution_secondary    difmap
_atom_sites_solution_hydrogens    geom
_refine_ls_hydrogen_treatment     constr
_refine_ls_extinction_method      none
_refine_ls_extinction_coef        .
_refine_ls_number_reflns          3869
_refine_ls_number_parameters      259
_refine_ls_number_restraints      0
_refine_ls_R_factor_all           0.0428
_refine_ls_R_factor_gt            0.0387
_refine_ls_wR_factor_ref          0.0999
_refine_ls_wR_factor_gt           0.0968
_refine_ls_goodness_of_fit_ref    1.026
_refine_ls_restrained_S_all       1.026
_refine_ls_shift/su_max           0.001
_refine_ls_shift/su_mean          0.000
 
loop_
 _atom_site_label
 _atom_site_type_symbol
 _atom_site_fract_x
 _atom_site_fract_y
 _atom_site_fract_z
 _atom_site_U_iso_or_equiv
 _atom_site_adp_type
 _atom_site_occupancy
 _atom_site_site_symmetry_order  
 _atom_site_calc_flag
 _atom_site_refinement_flags_posn
 _atom_site_refinement_flags_adp
 _atom_site_refinement_flags_occupancy
 _atom_site_disorder_assembly
 _atom_site_disorder_group
O1 O 0.29491(15) 0.57692(6) 0.23864(8) 0.0397(3) Uani 1 1 d . . . . .
O2 O 0.51703(15) 0.63690(5) 0.17073(7) 0.0295(2) Uani 1 1 d . . . . .
O3 O 0.66155(14) 0.64603(4) 0.36500(7) 0.0236(2) Uani 1 1 d . . . . .
O4 O 0.59117(15) 0.57761(4) 0.48285(7) 0.0258(2) Uani 1 1 d . . . . .
O5 O 0.61665(17) 0.34787(4) 0.30324(7) 0.0327(2) Uani 1 1 d . . . . .
O6 O 0.67225(14) 0.36898(4) 0.14580(7) 0.0250(2) Uani 1 1 d . . . . .
O7 O 0.20170(17) 0.41709(7) 0.18779(10) 0.0487(3) Uani 1 1 d . . . . .
O8 O 0.32150(17) 0.40168(7) 0.04513(8) 0.0492(3) Uani 1 1 d . . . . .
C1 C 0.62811(18) 0.58735(6) 0.31571(9) 0.0194(3) Uani 1 1 d . . . . .
C2 C 0.5889(2) 0.54020(6) 0.39708(9) 0.0208(3) Uani 1 1 d . . . . .
H2 H 0.4631 0.5162 0.3838 0.025 Uiso 1 1 calc R U . . .
C3 C 0.7729(2) 0.49810(6) 0.40292(10) 0.0238(3) Uani 1 1 d . . . . .
H3 H 0.8020 0.4771 0.4668 0.029 Uiso 1 1 calc R U . . .
C4 C 0.7707(2) 0.45340(6) 0.31601(10) 0.0240(3) Uani 1 1 d . . . . .
H4 H 0.8870 0.4246 0.3257 0.029 Uiso 1 1 calc R U . . .
C5 C 0.5870(2) 0.41392(6) 0.28722(10) 0.0247(3) Uani 1 1 d . . . . .
H5 H 0.4697 0.4295 0.3193 0.030 Uiso 1 1 calc R U . . .
C6 C 0.5546(2) 0.41966(6) 0.17762(10) 0.0237(3) Uani 1 1 d . . . . .
C7 C 0.6424(2) 0.48260(6) 0.14877(10) 0.0244(3) Uani 1 1 d . . . . .
H7A H 0.5394 0.5156 0.1439 0.029 Uiso 1 1 calc R U . . .
H7B H 0.6998 0.4790 0.0858 0.029 Uiso 1 1 calc R U . . .
C8 C 0.80465(19) 0.49848(6) 0.22965(9) 0.0226(3) Uani 1 1 d . . . . .
H8 H 0.9355 0.4879 0.2056 0.027 Uiso 1 1 calc R U . . .
C9 C 0.82341(19) 0.56403(6) 0.27905(9) 0.0214(3) Uani 1 1 d . . . . .
H9 H 0.8943 0.5961 0.2422 0.026 Uiso 1 1 calc R U . . .
C10 C 0.9332(2) 0.54469(7) 0.37604(10) 0.0262(3) Uani 1 1 d . . . . .
H10A H 1.0616 0.5241 0.3680 0.031 Uiso 1 1 calc R U . . .
H10B H 0.9513 0.5801 0.4220 0.031 Uiso 1 1 calc R U . . .
C11 C 0.4583(2) 0.59828(6) 0.23889(10) 0.0230(3) Uani 1 1 d . . . . .
C12 C 0.3653(3) 0.65384(9) 0.09628(12) 0.0440(4) Uani 1 1 d . . . . .
H12A H 0.4217 0.6815 0.0493 0.066 Uiso 1 1 calc R U . . .
H12B H 0.2579 0.6757 0.1254 0.066 Uiso 1 1 calc R U . . .
H12C H 0.3136 0.6158 0.0637 0.066 Uiso 1 1 calc R U . . .
C13 C 0.5771(2) 0.64220(6) 0.45648(10) 0.0244(3) Uani 1 1 d . . . . .
C14 C 0.7061(2) 0.68031(8) 0.52838(11) 0.0351(3) Uani 1 1 d . . . . .
H14A H 0.8422 0.6647 0.5305 0.053 Uiso 1 1 calc R U . . .
H14B H 0.6567 0.6764 0.5924 0.053 Uiso 1 1 calc R U . . .
H14C H 0.7029 0.7245 0.5088 0.053 Uiso 1 1 calc R U . . .
C15 C 0.3634(2) 0.66348(7) 0.44821(11) 0.0315(3) Uani 1 1 d . . . . .
H15A H 0.2863 0.6367 0.4019 0.047 Uiso 1 1 calc R U . . .
H15B H 0.3558 0.7072 0.4259 0.047 Uiso 1 1 calc R U . . .
H15C H 0.3098 0.6604 0.5114 0.047 Uiso 1 1 calc R U . . .
C16 C 0.6734(2) 0.31937(6) 0.21607(10) 0.0283(3) Uani 1 1 d . . . . .
C17 C 0.5213(2) 0.26920(7) 0.18607(13) 0.0367(4) Uani 1 1 d . . . . .
H17A H 0.3894 0.2882 0.1789 0.055 Uiso 1 1 calc R U . . .
H17B H 0.5243 0.2363 0.2355 0.055 Uiso 1 1 calc R U . . .
H17C H 0.5521 0.2508 0.1245 0.055 Uiso 1 1 calc R U . . .
C18 C 0.8808(2) 0.29390(7) 0.23049(12) 0.0364(4) Uani 1 1 d . . . . .
H18A H 0.9727 0.3283 0.2483 0.055 Uiso 1 1 calc R U . . .
H18B H 0.9169 0.2744 0.1705 0.055 Uiso 1 1 calc R U . . .
H18C H 0.8879 0.2624 0.2821 0.055 Uiso 1 1 calc R U . . .
C19 C 0.3391(2) 0.41274(7) 0.13915(11) 0.0288(3) Uani 1 1 d . . . . .
C20 C 0.1212(3) 0.39428(12) 0.00173(15) 0.0574(6) Uani 1 1 d . . . . .
H20A H 0.1249 0.3808 -0.0655 0.086 Uiso 1 1 calc R U . . .
H20B H 0.0512 0.4345 0.0038 0.086 Uiso 1 1 calc R U . . .
H20C H 0.0522 0.3626 0.0376 0.086 Uiso 1 1 calc R U . . .
 
loop_
 _atom_site_aniso_label
 _atom_site_aniso_U_11
 _atom_site_aniso_U_22
 _atom_site_aniso_U_33
 _atom_site_aniso_U_23
 _atom_site_aniso_U_13
 _atom_site_aniso_U_12
O1 0.0211(5) 0.0649(8) 0.0326(6) 0.0017(5) -0.0004(4) -0.0050(5)
O2 0.0368(6) 0.0257(5) 0.0247(5) 0.0063(4) -0.0045(4) 0.0022(4)
O3 0.0303(5) 0.0183(4) 0.0224(5) -0.0007(3) 0.0041(4) -0.0059(4)
O4 0.0376(6) 0.0197(5) 0.0206(5) 0.0006(4) 0.0054(4) -0.0012(4)
O5 0.0511(7) 0.0183(5) 0.0301(5) 0.0014(4) 0.0117(5) 0.0026(4)
O6 0.0267(5) 0.0217(5) 0.0272(5) -0.0025(4) 0.0052(4) 0.0046(4)
O7 0.0263(6) 0.0629(8) 0.0581(8) -0.0220(6) 0.0101(5) -0.0016(5)
O8 0.0245(6) 0.0893(10) 0.0329(6) 0.0055(6) -0.0030(5) -0.0052(6)
C1 0.0205(6) 0.0165(6) 0.0211(6) 0.0001(5) 0.0013(5) -0.0025(5)
C2 0.0242(7) 0.0186(6) 0.0198(6) 0.0002(5) 0.0028(5) -0.0012(5)
C3 0.0258(7) 0.0236(6) 0.0217(6) 0.0043(5) -0.0003(5) 0.0022(5)
C4 0.0252(7) 0.0224(6) 0.0247(7) 0.0029(5) 0.0035(5) 0.0058(5)
C5 0.0302(7) 0.0176(6) 0.0273(7) 0.0009(5) 0.0080(5) 0.0028(5)
C6 0.0227(7) 0.0211(6) 0.0279(7) -0.0023(5) 0.0051(5) 0.0030(5)
C7 0.0277(7) 0.0224(6) 0.0230(6) -0.0001(5) 0.0023(5) 0.0004(5)
C8 0.0204(6) 0.0239(6) 0.0236(6) 0.0017(5) 0.0032(5) 0.0026(5)
C9 0.0184(6) 0.0241(6) 0.0218(6) 0.0022(5) 0.0014(5) -0.0026(5)
C10 0.0206(7) 0.0320(7) 0.0256(7) 0.0022(6) -0.0012(5) 0.0001(5)
C11 0.0241(7) 0.0221(6) 0.0227(6) -0.0023(5) 0.0019(5) 0.0039(5)
C12 0.0499(10) 0.0493(10) 0.0310(8) 0.0082(7) -0.0077(7) 0.0202(8)
C13 0.0312(7) 0.0200(6) 0.0222(6) 0.0006(5) 0.0043(5) -0.0048(5)
C14 0.0430(9) 0.0337(8) 0.0290(8) -0.0069(6) 0.0060(6) -0.0129(7)
C15 0.0358(8) 0.0271(7) 0.0324(8) -0.0001(6) 0.0077(6) 0.0020(6)
C16 0.0351(8) 0.0210(7) 0.0295(7) -0.0012(5) 0.0059(6) 0.0018(6)
C17 0.0385(9) 0.0259(7) 0.0467(9) -0.0056(6) 0.0091(7) -0.0026(6)
C18 0.0382(9) 0.0248(7) 0.0457(9) -0.0003(6) 0.0007(7) 0.0064(6)
C19 0.0254(7) 0.0230(7) 0.0385(8) -0.0010(6) 0.0050(6) 0.0008(5)
C20 0.0291(9) 0.0935(16) 0.0475(11) 0.0110(11) -0.0098(8) -0.0110(9)
 
_geom_special_details
;
 All esds (except the esd in the dihedral angle between two l.s. planes)
 are estimated using the full covariance matrix.  The cell esds are taken
 into account individually in the estimation of esds in distances, angles
 and torsion angles; correlations between esds in cell parameters are only
 used when they are defined by crystal symmetry.  An approximate (isotropic)
 treatment of cell esds is used for estimating esds involving l.s. planes.
;
 
loop_
 _geom_bond_atom_site_label_1
 _geom_bond_atom_site_label_2
 _geom_bond_distance
 _geom_bond_site_symmetry_2
 _geom_bond_publ_flag
O1 C11 1.1980(17) . ?
O2 C11 1.3393(17) . ?
O2 C12 1.4460(18) . ?
O3 C1 1.4340(15) . ?
O3 C13 1.4388(16) . ?
O4 C13 1.4240(16) . ?
O4 C2 1.4330(15) . ?
O5 C5 1.4351(16) . ?
O5 C16 1.4354(17) . ?
O6 C6 1.4329(15) . ?
O6 C16 1.4383(17) . ?
O7 C19 1.1990(19) . ?
O8 C19 1.324(2) . ?
O8 C20 1.451(2) . ?
C1 C11 1.5252(18) . ?
C1 C9 1.5400(18) . ?
C1 C2 1.5512(17) . ?
C2 C3 1.5341(18) . ?
C3 C4 1.5372(19) . ?
C3 C10 1.5403(19) . ?
C4 C5 1.5300(19) . ?
C4 C8 1.5684(18) . ?
C5 C6 1.5269(19) . ?
C6 C19 1.524(2) . ?
C6 C7 1.5325(18) . ?
C7 C8 1.5471(18) . ?
C8 C9 1.5559(18) . ?
C9 C10 1.5434(18) . ?
C13 C14 1.5111(19) . ?
C13 C15 1.515(2) . ?
C16 C18 1.507(2) . ?
C16 C17 1.520(2) . ?
C2 H2 1.0000 . ?
C3 H3 1.0000 . ?
C4 H4 1.0000 . ?
C5 H5 1.0000 . ?
C7 H7A 0.9900 . ?
C7 H7B 0.9900 . ?
C8 H8 1.0000 . ?
C9 H9 1.0000 . ?
C10 H10A 0.9900 . ?
C10 H10B 0.9900 . ?
C12 H12A 0.9800 . ?
C12 H12B 0.9800 . ?
C12 H12C 0.9800 . ?
C14 H14A 0.9800 . ?
C14 H14B 0.9800 . ?
C14 H14C 0.9800 . ?
C15 H15A 0.9800 . ?
C15 H15B 0.9800 . ?
C15 H15C 0.9800 . ?
C17 H17A 0.9800 . ?
C17 H17B 0.9800 . ?
C17 H17C 0.9800 . ?
C18 H18A 0.9800 . ?
C18 H18B 0.9800 . ?
C18 H18C 0.9800 . ?
C20 H20A 0.9800 . ?
C20 H20B 0.9800 . ?
C20 H20C 0.9800 . ?
 
loop_
 _geom_angle_atom_site_label_1
 _geom_angle_atom_site_label_2
 _geom_angle_atom_site_label_3
 _geom_angle
 _geom_angle_site_symmetry_1
 _geom_angle_site_symmetry_3
 _geom_angle_publ_flag
C11 O2 C12 115.10(12) . . ?
C1 O3 C13 108.30(9) . . ?
C13 O4 C2 109.04(9) . . ?
C5 O5 C16 109.07(10) . . ?
C6 O6 C16 108.42(10) . . ?
C19 O8 C20 115.94(14) . . ?
O3 C1 C11 106.47(10) . . ?
O3 C1 C9 109.35(10) . . ?
C11 C1 C9 116.09(10) . . ?
O3 C1 C2 104.17(10) . . ?
C11 C1 C2 116.43(11) . . ?
C9 C1 C2 103.61(10) . . ?
O4 C2 C3 109.04(10) . . ?
O4 C2 C1 104.85(10) . . ?
C3 C2 C1 103.30(10) . . ?
C2 C3 C4 111.31(11) . . ?
C2 C3 C10 101.47(10) . . ?
C4 C3 C10 99.80(11) . . ?
C5 C4 C3 120.12(11) . . ?
C5 C4 C8 107.60(11) . . ?
C3 C4 C8 103.32(10) . . ?
O5 C5 C6 103.91(10) . . ?
O5 C5 C4 113.35(11) . . ?
C6 C5 C4 105.44(11) . . ?
O6 C6 C19 111.21(11) . . ?
O6 C6 C5 102.04(10) . . ?
C19 C6 C5 113.58(11) . . ?
O6 C6 C7 109.84(11) . . ?
C19 C6 C7 112.01(11) . . ?
C5 C6 C7 107.66(11) . . ?
C6 C7 C8 105.64(11) . . ?
C7 C8 C9 123.03(11) . . ?
C7 C8 C4 106.44(11) . . ?
C9 C8 C4 102.86(10) . . ?
C1 C9 C10 99.50(10) . . ?
C1 C9 C8 113.14(10) . . ?
C10 C9 C8 99.39(10) . . ?
C3 C10 C9 94.75(10) . . ?
O1 C11 O2 123.98(13) . . ?
O1 C11 C1 126.27(13) . . ?
O2 C11 C1 109.74(11) . . ?
O4 C13 O3 105.01(10) . . ?
O4 C13 C14 108.94(12) . . ?
O3 C13 C14 107.66(11) . . ?
O4 C13 C15 110.63(11) . . ?
O3 C13 C15 111.28(11) . . ?
C14 C13 C15 112.96(12) . . ?
O5 C16 O6 106.02(10) . . ?
O5 C16 C18 110.55(12) . . ?
O6 C16 C18 107.99(12) . . ?
O5 C16 C17 107.82(12) . . ?
O6 C16 C17 111.27(12) . . ?
C18 C16 C17 112.99(12) . . ?
O7 C19 O8 123.90(14) . . ?
O7 C19 C6 124.26(14) . . ?
O8 C19 C6 111.84(12) . . ?
O4 C2 H2 113.0 . . ?
C3 C2 H2 113.0 . . ?
C1 C2 H2 113.0 . . ?
C2 C3 H3 114.2 . . ?
C4 C3 H3 114.2 . . ?
C10 C3 H3 114.2 . . ?
C5 C4 H4 108.4 . . ?
C3 C4 H4 108.4 . . ?
C8 C4 H4 108.4 . . ?
O5 C5 H5 111.3 . . ?
C6 C5 H5 111.3 . . ?
C4 C5 H5 111.3 . . ?
C6 C7 H7A 110.6 . . ?
C8 C7 H7A 110.6 . . ?
C6 C7 H7B 110.6 . . ?
C8 C7 H7B 110.6 . . ?
H7A C7 H7B 108.7 . . ?
C7 C8 H8 107.9 . . ?
C9 C8 H8 107.9 . . ?
C4 C8 H8 107.9 . . ?
C1 C9 H9 114.3 . . ?
C10 C9 H9 114.3 . . ?
C8 C9 H9 114.3 . . ?
C3 C10 H10A 112.8 . . ?
C9 C10 H10A 112.8 . . ?
C3 C10 H10B 112.8 . . ?
C9 C10 H10B 112.8 . . ?
H10A C10 H10B 110.2 . . ?
O2 C12 H12A 109.5 . . ?
O2 C12 H12B 109.5 . . ?
H12A C12 H12B 109.5 . . ?
O2 C12 H12C 109.5 . . ?
H12A C12 H12C 109.5 . . ?
H12B C12 H12C 109.5 . . ?
C13 C14 H14A 109.5 . . ?
C13 C14 H14B 109.5 . . ?
H14A C14 H14B 109.5 . . ?
C13 C14 H14C 109.5 . . ?
H14A C14 H14C 109.5 . . ?
H14B C14 H14C 109.5 . . ?
C13 C15 H15A 109.5 . . ?
C13 C15 H15B 109.5 . . ?
H15A C15 H15B 109.5 . . ?
C13 C15 H15C 109.5 . . ?
H15A C15 H15C 109.5 . . ?
H15B C15 H15C 109.5 . . ?
C16 C17 H17A 109.5 . . ?
C16 C17 H17B 109.5 . . ?
H17A C17 H17B 109.5 . . ?
C16 C17 H17C 109.5 . . ?
H17A C17 H17C 109.5 . . ?
H17B C17 H17C 109.5 . . ?
C16 C18 H18A 109.5 . . ?
C16 C18 H18B 109.5 . . ?
H18A C18 H18B 109.5 . . ?
C16 C18 H18C 109.5 . . ?
H18A C18 H18C 109.5 . . ?
H18B C18 H18C 109.5 . . ?
O8 C20 H20A 109.5 . . ?
O8 C20 H20B 109.5 . . ?
H20A C20 H20B 109.5 . . ?
O8 C20 H20C 109.5 . . ?
H20A C20 H20C 109.5 . . ?
H20B C20 H20C 109.5 . . ?
 
loop_
 _geom_torsion_atom_site_label_1
 _geom_torsion_atom_site_label_2
 _geom_torsion_atom_site_label_3
 _geom_torsion_atom_site_label_4
 _geom_torsion
 _geom_torsion_site_symmetry_1
 _geom_torsion_site_symmetry_2
 _geom_torsion_site_symmetry_3
 _geom_torsion_site_symmetry_4
 _geom_torsion_publ_flag
C13 O3 C1 C11 103.08(11) . . . . ?
C13 O3 C1 C9 -130.76(11) . . . . ?
C13 O3 C1 C2 -20.52(13) . . . . ?
C13 O4 C2 C3 124.71(11) . . . . ?
C13 O4 C2 C1 14.63(13) . . . . ?
O3 C1 C2 O4 3.69(13) . . . . ?
C11 C1 C2 O4 -113.19(12) . . . . ?
C9 C1 C2 O4 118.07(11) . . . . ?
O3 C1 C2 C3 -110.48(11) . . . . ?
C11 C1 C2 C3 132.64(11) . . . . ?
C9 C1 C2 C3 3.90(12) . . . . ?
O4 C2 C3 C4 175.89(10) . . . . ?
C1 C2 C3 C4 -73.00(13) . . . . ?
O4 C2 C3 C10 -78.71(12) . . . . ?
C1 C2 C3 C10 32.40(12) . . . . ?
C2 C3 C4 C5 -49.96(16) . . . . ?
C10 C3 C4 C5 -156.46(11) . . . . ?
C2 C3 C4 C8 69.81(13) . . . . ?
C10 C3 C4 C8 -36.69(12) . . . . ?
C16 O5 C5 C6 20.30(14) . . . . ?
C16 O5 C5 C4 -93.64(14) . . . . ?
C3 C4 C5 O5 -111.66(13) . . . . ?
C8 C4 C5 O5 130.73(11) . . . . ?
C3 C4 C5 C6 135.33(12) . . . . ?
C8 C4 C5 C6 17.72(13) . . . . ?
C16 O6 C6 C19 -90.40(13) . . . . ?
C16 O6 C6 C5 31.04(13) . . . . ?
C16 O6 C6 C7 145.04(11) . . . . ?
O5 C5 C6 O6 -30.93(13) . . . . ?
C4 C5 C6 O6 88.54(11) . . . . ?
O5 C5 C6 C19 88.86(13) . . . . ?
C4 C5 C6 C19 -151.67(11) . . . . ?
O5 C5 C6 C7 -146.53(11) . . . . ?
C4 C5 C6 C7 -27.06(14) . . . . ?
O6 C6 C7 C8 -84.65(13) . . . . ?
C19 C6 C7 C8 151.25(11) . . . . ?
C5 C6 C7 C8 25.70(14) . . . . ?
C6 C7 C8 C9 -132.09(12) . . . . ?
C6 C7 C8 C4 -14.14(13) . . . . ?
C5 C4 C8 C7 -2.20(14) . . . . ?
C3 C4 C8 C7 -130.23(11) . . . . ?
C5 C4 C8 C9 128.36(11) . . . . ?
C3 C4 C8 C9 0.33(13) . . . . ?
O3 C1 C9 C10 72.05(12) . . . . ?
C11 C1 C9 C10 -167.51(11) . . . . ?
C2 C1 C9 C10 -38.56(12) . . . . ?
O3 C1 C9 C8 176.61(10) . . . . ?
C11 C1 C9 C8 -62.94(14) . . . . ?
C2 C1 C9 C8 66.00(13) . . . . ?
C7 C8 C9 C1 51.03(16) . . . . ?
C4 C8 C9 C1 -68.63(13) . . . . ?
C7 C8 C9 C10 155.66(12) . . . . ?
C4 C8 C9 C10 36.00(12) . . . . ?
C2 C3 C10 C9 -55.54(11) . . . . ?
C4 C3 C10 C9 58.76(11) . . . . ?
C1 C9 C10 C3 57.37(11) . . . . ?
C8 C9 C10 C3 -58.19(11) . . . . ?
C12 O2 C11 O1 2.3(2) . . . . ?
C12 O2 C11 C1 -176.66(12) . . . . ?
O3 C1 C11 O1 -110.85(15) . . . . ?
C9 C1 C11 O1 127.17(15) . . . . ?
C2 C1 C11 O1 4.8(2) . . . . ?
O3 C1 C11 O2 68.08(13) . . . . ?
C9 C1 C11 O2 -53.90(14) . . . . ?
C2 C1 C11 O2 -176.32(10) . . . . ?
C2 O4 C13 O3 -27.46(13) . . . . ?
C2 O4 C13 C14 -142.56(12) . . . . ?
C2 O4 C13 C15 92.70(13) . . . . ?
C1 O3 C13 O4 29.97(13) . . . . ?
C1 O3 C13 C14 145.95(11) . . . . ?
C1 O3 C13 C15 -89.76(12) . . . . ?
C5 O5 C16 O6 -1.63(15) . . . . ?
C5 O5 C16 C18 115.15(13) . . . . ?
C5 O5 C16 C17 -120.89(13) . . . . ?
C6 O6 C16 O5 -19.44(14) . . . . ?
C6 O6 C16 C18 -137.93(12) . . . . ?
C6 O6 C16 C17 97.52(13) . . . . ?
C20 O8 C19 O7 -0.4(3) . . . . ?
C20 O8 C19 C6 179.92(15) . . . . ?
O6 C6 C19 O7 131.11(15) . . . . ?
C5 C6 C19 O7 16.7(2) . . . . ?
C7 C6 C19 O7 -105.56(17) . . . . ?
O6 C6 C19 O8 -49.26(16) . . . . ?
C5 C6 C19 O8 -163.69(12) . . . . ?
C7 C6 C19 O8 74.08(15) . . . . ?
 
_refine_diff_density_max    0.369
_refine_diff_density_min   -0.239
_refine_diff_density_rms    0.038

_shelx_res_file
;

    uvic1409a.res created by SHELXL-2014/7


REM Solution 1  R1  0.145  Rweak  0.006,  Alpha = 0.0281  in P2(1)/n
REM Formula:  C21 O7
TITL UVIC1409 in P2(1)/n
CELL  1.54178   6.7876  21.2855  13.9033   90.000   94.600   90.000
ZERR    4.00   0.00020   0.00050   0.00040   0.0000   0.0014   0.0000
LATT  1
SYMM 1/2-X, 1/2+Y, 1/2-Z
SFAC C H O
UNIT 80 112 32
TEMP -153.190
SIZE 0.035 0.082 0.151

L.S. 10
BOND $H
FMAP 2
PLAN 20
CONF
ACTA

WGHT    0.047300    0.961100
FVAR       0.56808
O1    3    0.294909    0.576924    0.238643    11.00000    0.02112    0.06493 =
         0.03260    0.00166   -0.00039   -0.00497
O2    3    0.517026    0.636904    0.170732    11.00000    0.03683    0.02573 =
         0.02473    0.00631   -0.00451    0.00218
O3    3    0.661555    0.646031    0.365001    11.00000    0.03031    0.01831 =
         0.02245   -0.00072    0.00409   -0.00594
O4    3    0.591172    0.577614    0.482846    11.00000    0.03756    0.01972 =
         0.02064    0.00064    0.00536   -0.00116
O5    3    0.616647    0.347868    0.303238    11.00000    0.05111    0.01834 =
         0.03005    0.00141    0.01172    0.00258
O6    3    0.672252    0.368985    0.145804    11.00000    0.02668    0.02167 =
         0.02718   -0.00248    0.00524    0.00457
O7    3    0.201700    0.417089    0.187791    11.00000    0.02632    0.06287 =
         0.05810   -0.02198    0.01010   -0.00160
O8    3    0.321501    0.401677    0.045134    11.00000    0.02448    0.08932 =
         0.03291    0.00553   -0.00300   -0.00517
C1    1    0.628108    0.587350    0.315707    11.00000    0.02051    0.01654 =
         0.02112    0.00011    0.00134   -0.00254
C2    1    0.588905    0.540199    0.397076    11.00000    0.02417    0.01865 =
         0.01977    0.00023    0.00284   -0.00118
AFIX  13
H2    2    0.463103    0.516151    0.383783    11.00000   -1.20000
AFIX   0
C3    1    0.772913    0.498098    0.402925    11.00000    0.02583    0.02361 =
         0.02167    0.00425   -0.00034    0.00225
AFIX  13
H3    2    0.802034    0.477093    0.466821    11.00000   -1.20000
AFIX   0
C4    1    0.770735    0.453396    0.316007    11.00000    0.02525    0.02242 =
         0.02467    0.00294    0.00353    0.00583
AFIX  13
H4    2    0.886973    0.424573    0.325707    11.00000   -1.20000
AFIX   0
C5    1    0.587029    0.413921    0.287222    11.00000    0.03025    0.01757 =
         0.02732    0.00095    0.00798    0.00283
AFIX  13
H5    2    0.469723    0.429508    0.319304    11.00000   -1.20000
AFIX   0
C6    1    0.554626    0.419660    0.177624    11.00000    0.02273    0.02107 =
         0.02786   -0.00231    0.00513    0.00295
C7    1    0.642352    0.482600    0.148767    11.00000    0.02775    0.02240 =
         0.02300   -0.00007    0.00229    0.00040
AFIX  23
H7A   2    0.539394    0.515645    0.143901    11.00000   -1.20000
H7B   2    0.699828    0.478953    0.085773    11.00000   -1.20000
AFIX   0
C8    1    0.804649    0.498480    0.229649    11.00000    0.02044    0.02391 =
         0.02361    0.00172    0.00324    0.00256
AFIX  13
H8    2    0.935518    0.487867    0.205558    11.00000   -1.20000
AFIX   0
C9    1    0.823405    0.564032    0.279051    11.00000    0.01839    0.02410 =
         0.02182    0.00215    0.00136   -0.00256
AFIX  13
H9    2    0.894251    0.596113    0.242171    11.00000   -1.20000
AFIX   0
C10   1    0.933217    0.544695    0.376035    11.00000    0.02057    0.03200 =
         0.02556    0.00217   -0.00120    0.00010
AFIX  23
H10A  2    1.061597    0.524076    0.367988    11.00000   -1.20000
H10B  2    0.951315    0.580128    0.422021    11.00000   -1.20000
AFIX   0
C11   1    0.458252    0.598281    0.238894    11.00000    0.02414    0.02210 =
         0.02265   -0.00228    0.00193    0.00390
C12   1    0.365316    0.653840    0.096278    11.00000    0.04987    0.04934 =
         0.03099    0.00821   -0.00771    0.02025
AFIX 137
H12A  2    0.421701    0.681513    0.049286    11.00000   -1.50000
H12B  2    0.257872    0.675722    0.125422    11.00000   -1.50000
H12C  2    0.313555    0.615762    0.063665    11.00000   -1.50000
AFIX   0
C13   1    0.577070    0.642197    0.456480    11.00000    0.03115    0.02002 =
         0.02224    0.00061    0.00427   -0.00481
C14   1    0.706065    0.680308    0.528378    11.00000    0.04296    0.03374 =
         0.02898   -0.00685    0.00604   -0.01288
AFIX 137
H14A  2    0.842198    0.664716    0.530537    11.00000   -1.50000
H14B  2    0.656729    0.676377    0.592445    11.00000   -1.50000
H14C  2    0.702923    0.724545    0.508781    11.00000   -1.50000
AFIX   0
C15   1    0.363370    0.663478    0.448206    11.00000    0.03578    0.02709 =
         0.03243   -0.00009    0.00768    0.00198
AFIX 137
H15A  2    0.286261    0.636661    0.401887    11.00000   -1.50000
H15B  2    0.355789    0.707160    0.425944    11.00000   -1.50000
H15C  2    0.309838    0.660378    0.511434    11.00000   -1.50000
AFIX   0
C16   1    0.673430    0.319368    0.216069    11.00000    0.03509    0.02097 =
         0.02947   -0.00116    0.00594    0.00175
C17   1    0.521293    0.269203    0.186069    11.00000    0.03846    0.02594 =
         0.04670   -0.00556    0.00914   -0.00258
AFIX 137
H17A  2    0.389390    0.288182    0.178881    11.00000   -1.50000
H17B  2    0.524312    0.236337    0.235528    11.00000   -1.50000
H17C  2    0.552109    0.250754    0.124461    11.00000   -1.50000
AFIX   0
C18   1    0.880841    0.293898    0.230489    11.00000    0.03820    0.02476 =
         0.04565   -0.00031    0.00065    0.00637
AFIX 137
H18A  2    0.972662    0.328282    0.248255    11.00000   -1.50000
H18B  2    0.916890    0.274420    0.170488    11.00000   -1.50000
H18C  2    0.887856    0.262428    0.282100    11.00000   -1.50000
AFIX   0
C19   1    0.339146    0.412744    0.139148    11.00000    0.02535    0.02299 =
         0.03847   -0.00100    0.00501    0.00079
C20   1    0.121209    0.394277    0.001734    11.00000    0.02910    0.09349 =
         0.04755    0.01102   -0.00977   -0.01098
AFIX 137
H20A  2    0.124947    0.380805   -0.065497    11.00000   -1.50000
H20B  2    0.051193    0.434458    0.003822    11.00000   -1.50000
H20C  2    0.052217    0.362569    0.037566    11.00000   -1.50000

AFIX   0
HKLF 4

REM  UVIC1409 in P2(1)/n
REM R1 =  0.0387 for    3492 Fo > 4sig(Fo)  and  0.0428 for all    3869 data
REM    259 parameters refined using      0 restraints

END

WGHT      0.0473      0.9605

REM Highest difference peak  0.369,  deepest hole -0.239,  1-sigma level  0.038
Q1    1   0.2125  0.4494  0.1404  11.00000  0.05    0.37
Q2    1   0.7152  0.2758  0.2050  11.00000  0.05    0.34
Q3    1   0.5475  0.5900  0.2779  11.00000  0.05    0.32
Q4    1   0.5983  0.5655  0.3559  11.00000  0.05    0.30
Q5    1   0.7189  0.5780  0.2930  11.00000  0.05    0.30
Q6    1   0.5555  0.4208  0.2329  11.00000  0.05    0.28
Q7    1   0.6709  0.5168  0.3989  11.00000  0.05    0.28
Q8    1   0.7793  0.3052  0.2208  11.00000  0.05    0.26
Q9    1   0.6388  0.6584  0.4925  11.00000  0.05    0.25
Q10   1   0.6791  0.4371  0.3038  11.00000  0.05    0.25
Q11   1   0.7875  0.5321  0.2518  11.00000  0.05    0.25
Q12   1   0.7614  0.4750  0.3579  11.00000  0.05    0.25
Q13   1   0.7858  0.4759  0.2715  11.00000  0.05    0.23
Q14   1   0.4562  0.4161  0.1574  11.00000  0.05    0.22
Q15   1   0.8874  0.5566  0.3244  11.00000  0.05    0.22
Q16   1   0.8516  0.5215  0.3973  11.00000  0.05    0.21
Q17   1   0.4751  0.6576  0.4568  11.00000  0.05    0.21
Q18   1   0.1078  0.4194 -0.0604  11.00000  0.05    0.20
Q19   1   0.7141  0.4949  0.1929  11.00000  0.05    0.20
Q20   1   0.5886  0.4511  0.1618  11.00000  0.05    0.20
;
_shelx_res_checksum   20164

_shelx_hkl_file
;
  -1   0   0   -1.20    0.70
   1   0   0   -0.40    0.70
  -2   0   0  808.92   26.50
  -2   0   0  862.21   27.80
  -2   0   0  797.32   26.60
  -2   0   0  818.92   26.80
   2   0   0  791.62   27.60
  -3   0   0    1.60    1.40
  -3   0   0    2.10    1.30
  -3   0   0    1.50    1.20
  -3   0   0    3.00    1.30
   3   0   0    1.60    1.30
  -4   0   0  900.61   31.10
  -4   0   0  906.01   31.90
  -4   0   0  933.21   31.40
  -4   0   0  920.91   31.40
  -5   0   0    0.70    2.00
  -5   0   0    2.30    1.40
  -5   0   0    0.90    1.90
  -5   0   0    0.80    2.40
   5   0   0    1.70    1.90
  -6   0   0   97.99    5.30
  -6   0   0   99.39    5.40
  -6   0   0  112.29    5.70
  -6   0   0   94.49    5.70
  -7   0   0    0.00    1.80
  -7   0   0    2.40    1.60
  -7   0   0   -0.90    1.40
  -7   0   0   -2.00    1.90
  -8   0  -1   -1.50    0.90
  -7   0  -1   17.70    2.40
  -7   0  -1   15.50    2.50
  -7   0  -1   13.10    2.10
  -7   0  -1   13.90    2.20
  -6   0  -1   -0.30    1.70
  -6   0  -1   -0.30    1.80
  -6   0  -1    1.00    1.80
  -6   0  -1   -1.20    1.60
  -6   0  -1    0.90    1.80
   5   0   1  603.34   23.20
  -5   0  -1  631.84   21.30
  -5   0  -1  623.84   23.40
  -5   0  -1  643.34   23.50
  -5   0  -1  627.34   24.20
   4   0   1   -0.30    1.50
  -4   0  -1   -0.80    1.40
  -4   0  -1   -0.20    1.60
  -4   0  -1    0.50    1.10
  -4   0  -1   -1.00    1.40
  -4   0  -1    0.80    1.70
  -3   0  -1 1308.87   42.00
  -3   0  -1 1272.77   42.00
  -3   0  -1 1290.37   42.60
  -2   0  -1    0.10    0.90
  -2   0  -1    0.10    1.10
  -2   0  -1    0.00    0.90
  -2   0  -1    1.10    0.90
  -2   0  -1   -0.20    0.90
  -2   0  -1    0.30    1.40
   1   0   1 8148.19  244.08
   1   0   1 7668.33  243.68
  -1   0  -1 7771.12  243.78
  -1   0  -1 7530.75  244.28
  -1   0  -1 7944.91  246.28
   0   0   1   -8.30    0.40
   0   0   1   -8.20    0.40
   0   0   1   -8.50    0.30
   0   0  -1   -8.40    0.30
   0   0  -1   -8.40    0.40
   0   0  -1   -8.20    0.40
  -1   0   1 3600.74  114.59
   1   0  -1 3795.42  114.69
   1   0  -1 3664.53  114.69
  -2   0   1    0.40    1.00
  -2   0   1   -0.70    0.80
  -2   0   1   -0.80    1.00
  -2   0   1   -0.60    1.00
   2   0  -1    0.60    0.90
   2   0  -1    0.60    1.00
  -3   0   1 2418.06   78.79
  -3   0   1 2444.16   79.99
  -3   0   1 2571.14   78.59
  -3   0   1 2446.46   78.49
  -3   0   1 2566.24   78.79
   3   0  -1 2422.06   80.19
  -4   0   1   -0.20    1.50
  -4   0   1   -0.30    1.70
  -4   0   1    1.50    1.50
  -4   0   1   -1.20    1.50
  -4   0   1    1.00    1.40
   4   0  -1    0.00    1.60
  -5   0   1  300.47   13.60
  -5   0   1  311.67   11.20
  -5   0   1  302.67   13.40
  -5   0   1  293.47   13.10
  -5   0   1  318.97   13.40
  -6   0   1    2.00    1.60
  -6   0   1   -1.30    1.50
  -6   0   1    2.20    2.60
  -8   0  -2    5.90    1.30
  -8   0  -2    9.60    2.10
  -8   0  -2    6.10    1.30
  -7   0  -2   -1.30    1.30
  -7   0  -2   -1.00    1.70
  -7   0  -2    1.20    1.60
  -7   0  -2    0.30    1.60
  -7   0  -2    0.10    1.40
  -6   0  -2  676.93   23.10
  -6   0  -2  659.33   22.80
  -6   0  -2  651.03   22.80
  -6   0  -2  654.33   22.70
  -6   0  -2  667.73   22.90
   5   0   2   -0.40    2.00
   5   0   2    2.00    2.30
  -5   0  -2   -1.30    2.10
  -5   0  -2    0.50    2.00
  -5   0  -2    0.60    2.00
  -5   0  -2    1.10    1.40
   4   0   2   67.49    4.80
  -4   0  -2   64.39    5.30
  -4   0  -2   68.19    3.60
  -4   0  -2   74.39    5.00
  -4   0  -2   64.19    5.00
  -4   0  -2   68.69    4.80
   3   0   2   -0.10    1.10
  -3   0  -2    1.10    1.20
  -3   0  -2    1.80    1.30
  -3   0  -2    0.20    1.30
  -3   0  -2   -0.70    1.40
   2   0   2  145.99    6.80
   2   0   2  159.18    7.00
   2   0   2  167.58    6.50
  -2   0  -2  147.69    7.20
  -2   0  -2  176.48    6.90
  -2   0  -2  170.08    6.50
  -2   0  -2  160.48    7.90
  -2   0  -2  163.98    6.50
   1   0   2   -0.50    1.00
   1   0   2   -0.40    1.10
   1   0   2   -0.10    0.90
  -1   0  -2   -0.30    1.00
  -1   0  -2   -0.40    0.90
  -1   0  -2    0.10    1.10
   0   0   2 5796.02  178.28
   0   0   2 5544.95  176.98
   0   0   2 5609.84  176.98
   0   0  -2 5711.83  178.48
   0   0  -2 5869.21  178.18
   0   0  -2 5587.74  177.68
  -1   0   2   -0.30    0.80
   1   0  -2   -0.60    0.70
   1   0  -2   -0.30    0.70
   1   0  -2   -0.10    0.50
   1   0  -2    2.10    0.70
  -2   0   2  107.69    4.80
  -2   0   2   86.09    4.30
  -2   0   2  109.59    4.80
   2   0  -2  105.89    4.90
   2   0  -2  108.49    4.90
  -3   0   2   -1.20    1.10
  -3   0   2   -0.50    1.20
  -3   0   2   -1.40    1.20
  -3   0   2    0.40    1.30
  -3   0   2    2.80    1.50
  -3   0   2    0.30    1.10
   3   0  -2   -1.30    0.90
  -4   0   2  252.07   11.20
  -4   0   2  267.97   11.30
  -4   0   2  267.97   11.30
  -4   0   2  274.07   11.20
  -4   0   2  280.17   15.00
   4   0  -2  275.57   11.50
  -5   0   2   -2.30    2.10
  -5   0   2    0.70    2.10
  -5   0   2    2.80    2.30
  -8   0  -3   -0.10    1.10
  -8   0  -3    0.10    1.10
  -7   0  -3    3.10    1.70
  -7   0  -3    5.00    1.90
  -7   0  -3    5.60    1.80
  -7   0  -3    4.90    1.70
  -7   0  -3    5.50    1.80
  -6   0  -3    1.00    1.70
  -6   0  -3    1.70    1.60
  -6   0  -3    1.10    1.80
  -6   0  -3   -2.20    1.60
  -6   0  -3    0.70    1.70
  -6   0  -3   -1.80    1.70
   5   0   3  565.84   21.80
   5   0   3  582.14   22.20
  -5   0  -3  553.94   21.60
  -5   0  -3  556.14   22.60
  -5   0  -3  582.04   19.70
   4   0   3   -1.10    0.90
   4   0   3   -0.20    1.60
  -4   0  -3   -2.10    1.50
  -4   0  -3    0.80    1.80
  -4   0  -3    1.70    2.00
  -4   0  -3    1.00    1.20
  -4   0  -3    1.20    1.00
   3   0   3   18.70    2.60
  -3   0  -3   22.70    2.80
  -3   0  -3   20.80    2.70
  -3   0  -3   20.90    2.90
  -3   0  -3   18.20    2.70
   2   0   3    0.30    1.00
  -2   0  -3   -0.70    0.90
  -2   0  -3    0.50    1.10
  -2   0  -3    1.60    1.60
  -2   0  -3    1.10    1.10
   1   0   3 1076.49   35.30
   1   0   3  963.90   34.70
   1   0   3 1123.69   35.30
   1   0   3  984.90   33.60
  -1   0  -3 1068.99   34.90
  -1   0  -3 1066.59   35.30
  -1   0  -3 1080.09   35.40
   0   0   3   -0.90    0.80
   0   0   3    0.20    1.40
   0   0   3   -0.30    1.30
   0   0  -3   -0.20    1.20
   0   0  -3   -1.00    0.80
   0   0  -3    0.20    1.30
  -1   0   3 7428.86  229.98
  -1   0   3 7641.74  229.28
   1   0  -3 7012.90  228.88
  -2   0   3   -1.70    0.90
  -2   0   3    0.70    1.00
  -2   0   3   -1.00    0.90
  -2   0   3   -0.40    1.10
   2   0  -3   -0.50    0.90
   2   0  -3   -0.60    0.80
   2   0  -3   -1.20    0.80
  -3   0   3  248.28   10.00
  -3   0   3  255.37   10.50
  -3   0   3  256.27   10.20
  -3   0   3  268.57   10.70
  -3   0   3  278.17   10.50
   3   0  -3  281.87   10.30
  -4   0   3   -3.50    1.30
  -4   0   3   -1.00    1.70
  -4   0   3    0.50    1.60
  -4   0   3   -2.40    1.50
  -5   0   3  183.98    9.40
  -5   0   3  175.48    7.40
  -5   0   3  182.78    9.40
  -7   0  -4    4.60    1.70
  -7   0  -4    1.30    1.50
  -7   0  -4   -1.20    1.40
  -7   0  -4    0.50    1.60
  -7   0  -4   -3.40    1.30
  -6   0  -4   75.49    4.80
  -6   0  -4   72.79    4.80
  -6   0  -4   73.89    4.70
  -6   0  -4   66.69    5.00
  -6   0  -4   76.99    4.80
  -6   0  -4   79.29    5.00
   5   0   4    5.80    2.70
   5   0   4   -1.70    2.60
  -5   0  -4   -1.30    2.20
  -5   0  -4    2.10    1.60
  -5   0  -4    0.20    2.30
   4   0   4   14.90    3.00
   4   0   4   14.30    2.80
   4   0   4   10.10    1.70
  -4   0  -4   10.50    2.50
  -4   0  -4   10.30    1.50
  -4   0  -4   13.40    3.10
  -4   0  -4   10.70    1.90
   3   0   4    0.90    1.60
   3   0   4    0.90    1.40
  -3   0  -4   -1.90    1.40
  -3   0  -4   -0.50    1.30
  -3   0  -4   -0.10    1.40
   2   0   4   27.80    2.70
   2   0   4   31.40    2.80
  -2   0  -4   30.60    2.90
  -2   0  -4   31.10    2.70
   1   0   4   -1.20    1.30
   1   0   4    1.60    1.10
   1   0   4    0.20    1.00
   1   0   4    0.70    1.60
  -1   0  -4   -1.00    1.30
  -1   0  -4    0.10    1.30
  -1   0  -4   -0.70    1.20
  -1   0  -4    0.20    0.90
   0   0   4  327.97   11.90
   0   0   4  344.27   13.70
   0   0   4  361.36   13.90
   0   0  -4  344.07   13.60
   0   0  -4  348.97   12.30
   0   0  -4  353.46   13.70
  -1   0   4    0.30    1.20
  -1   0   4   -0.70    0.80
  -1   0   4   -0.60    1.10
  -1   0   4    0.30    1.00
  -1   0   4   -0.40    1.00
   1   0  -4    0.60    1.20
   1   0  -4   -0.60    1.00
   1   0  -4   -1.20    0.80
  -2   0   4  254.47    9.40
  -2   0   4  238.78    9.10
  -2   0   4  248.78    9.80
  -2   0   4  246.38    9.60
   2   0  -4  255.47    9.60
  -3   0   4    0.40    1.30
  -3   0   4   -0.90    1.20
  -3   0   4    0.10    1.40
  -3   0   4    0.00    1.30
   3   0  -4   -1.80    1.10
  -4   0   4   15.80    3.10
  -4   0   4   11.90    2.60
  -4   0   4   19.90    3.20
  -4   0   4   14.40    2.10
  -5   0   4    1.50    2.40
  -5   0   4    1.20    2.40
  -5   0   4   -1.70    2.30
  -5   0   4    1.20    1.30
   5   0  -4    3.40    2.60
  -7   0  -5   99.89    4.90
  -7   0  -5  101.89    5.00
  -7   0  -5  108.09    5.00
  -7   0  -5   93.69    5.00
  -7   0  -5   99.19    4.90
  -6   0  -5    0.60    1.90
  -6   0  -5   -0.30    1.70
  -6   0  -5   -0.30    1.60
  -6   0  -5    0.90    1.60
  -6   0  -5   -1.40    1.50
  -6   0  -5    0.40    1.60
   5   0   5  140.99    8.40
   5   0   5  151.88    6.50
   5   0   5  169.88    9.40
  -5   0  -5  147.59    9.50
  -5   0  -5  149.69    8.70
  -5   0  -5  137.79    6.40
  -5   0  -5  149.79    6.90
   4   0   5   -0.50    1.10
   4   0   5   -0.80    2.00
   4   0   5   -1.40    1.70
  -4   0  -5   -2.20    1.20
  -4   0  -5    0.90    1.90
  -4   0  -5    1.20    1.90
  -4   0  -5   -0.30    1.00
   3   0   5  488.05   17.90
   3   0   5  476.65   16.20
   3   0   5  517.85   18.00
  -3   0  -5  497.85   18.10
  -3   0  -5  511.35   18.40
  -3   0  -5  468.75   16.20
  -3   0  -5  448.16   16.70
  -3   0  -5  475.65   17.70
   2   0   5   -0.80    1.20
   2   0   5    0.40    1.10
  -2   0  -5   -0.50    1.30
  -2   0  -5    2.20    1.20
  -2   0  -5   -1.40    1.40
   1   0   5  274.17   10.00
   1   0   5  264.07   12.50
   1   0   5  272.07   10.20
  -1   0  -5  287.17   10.10
  -1   0  -5  283.87   12.70
  -1   0  -5  271.87   11.50
   0   0   5    1.10    1.00
   0   0   5   -0.80    1.30
   0   0   5    0.30    1.00
   0   0   5    2.10    0.90
   0   0   5    1.90    1.80
   0   0   5    1.40    1.10
   0   0  -5    0.00    1.30
   0   0  -5    2.20    1.70
   0   0  -5    0.50    1.00
   0   0  -5    0.20    0.90
  -1   0   5 3191.78  100.09
  -1   0   5 3261.77  100.29
  -1   0   5 3116.39   99.99
   1   0  -5 3172.68  100.09
  -2   0   5    0.50    1.20
  -2   0   5    0.20    1.20
  -2   0   5    0.40    1.30
  -2   0   5   -0.10    1.20
   2   0  -5    0.90    1.20
  -3   0   5  563.44   20.20
  -3   0   5  562.24   20.90
  -3   0   5  575.24   20.70
  -3   0   5  574.04   20.40
   3   0  -5  586.24   20.50
  -4   0   5   -0.80    1.40
  -4   0   5   -1.10    1.90
  -4   0   5   -0.20    1.80
  -4   0   5    2.00    2.00
  -4   0   5    0.80    1.70
  -5   0   5  391.26   16.80
  -5   0   5  393.66   16.00
  -5   0   5  372.56   13.70
   5   0  -5  381.16   16.80
  -6   0   5    0.80    1.30
  -7   0  -6   -0.60    1.20
  -7   0  -6   -1.00    1.20
  -7   0  -6   -0.80    1.20
  -7   0  -6    0.70    1.30
  -7   0  -6   -0.70    1.40
  -6   0  -6    1.30    1.80
  -6   0  -6    3.00    1.70
  -6   0  -6    7.00    2.10
  -6   0  -6    3.80    1.80
  -6   0  -6    5.20    1.90
  -6   0  -6    6.40    1.90
   5   0   6    1.00    1.50
  -5   0  -6    1.00    1.60
  -5   0  -6    4.00    1.90
  -5   0  -6   -0.70    1.60
  -5   0  -6    1.40    1.40
  -5   0  -6    0.40    1.80
  -5   0  -6    0.30    1.60
  -5   0  -6    1.40    1.70
  -5   0  -6    1.50    1.50
   4   0   6  102.99    6.60
   4   0   6   92.49    4.80
   4   0   6   94.29    6.70
  -4   0  -6   96.19    6.40
  -4   0  -6   95.99    7.00
  -4   0  -6   89.49    4.80
  -4   0  -6   95.29    4.70
   3   0   6   -0.90    1.60
   3   0   6    0.50    1.60
   3   0   6    0.80    1.10
  -3   0  -6    0.80    1.60
  -3   0  -6    1.30    1.00
  -3   0  -6   -1.50    1.80
  -3   0  -6   -0.30    1.10
  -3   0  -6    1.40    1.70
   2   0   6  870.51   30.80
   2   0   6  922.31   30.70
  -2   0  -6  968.80   30.70
  -2   0  -6  883.51   30.90
  -2   0  -6  930.51   30.90
   1   0   6    1.80    1.40
   1   0   6    0.60    1.20
  -1   0  -6   -1.30    1.30
  -1   0  -6   -1.30    1.30
   0   0   6  777.82   25.70
   0   0   6  789.62   25.90
   0   0   6  730.83   25.30
   0   0  -6  777.72   25.80
   0   0  -6  808.32   27.90
  -1   0   6    0.60    1.30
  -1   0   6   -0.70    1.10
  -1   0   6   -0.10    1.10
  -1   0   6    1.40    1.30
   1   0  -6    0.70    1.30
   1   0  -6   -0.10    1.10
  -2   0   6   16.90    2.40
  -2   0   6   20.40    2.90
  -2   0   6   20.30    3.00
  -2   0   6   18.70    2.40
   2   0  -6   22.80    2.90
   2   0  -6   22.20    2.90
  -3   0   6   -0.30    1.10
  -3   0   6   -0.50    1.50
  -3   0   6    1.10    1.60
  -3   0   6   -0.60    1.70
  -3   0   6    2.50    1.90
   3   0  -6   -1.60    1.30
  -4   0   6  437.46   17.40
  -4   0   6  459.15   16.10
  -4   0   6  464.15   17.60
  -4   0   6  451.45   18.00
  -4   0   6  451.65   18.40
   4   0  -6  431.56   17.40
  -5   0   6   -1.00    1.20
  -5   0   6   -2.20    1.40
  -5   0   6   -2.00    2.30
  -5   0   6    0.40    3.00
   5   0  -6    6.30    2.90
  -6   0   6   48.70    5.80
  -6   0   6   53.99    3.60
  -6   0   6   47.70    3.40
  -6   0   6   52.49    4.10
   6   0  -6   61.49    6.40
  -7   0  -7    3.20    1.30
  -7   0  -7    7.30    1.50
  -7   0  -7    5.60    1.50
  -7   0  -7    4.20    1.30
  -7   0  -7    5.30    1.30
   6   0   7   -2.20    1.40
  -6   0  -7    2.20    1.70
  -6   0  -7   -0.30    1.40
  -6   0  -7   -1.30    1.40
  -6   0  -7   -2.60    1.40
  -6   0  -7    2.60    1.70
  -6   0  -7    0.60    1.40
  -6   0  -7   -0.80    1.50
   5   0   7  215.18    8.80
  -5   0  -7  222.28    9.20
  -5   0  -7  235.28    9.50
  -5   0  -7  233.98    9.10
  -5   0  -7  220.48    9.10
  -5   0  -7  214.48    9.20
  -5   0  -7  206.38    9.30
  -5   0  -7  218.38    9.40
   4   0   7    1.20    2.40
   4   0   7   -1.00    1.30
   4   0   7    1.90    2.50
  -4   0  -7    0.10    1.30
  -4   0  -7   -1.30    2.20
  -4   0  -7    0.60    2.50
  -4   0  -7    0.20    1.30
   3   0   7  212.68    9.90
   3   0   7  211.18    9.70
   3   0   7  205.08    8.00
  -3   0  -7  214.38    8.10
  -3   0  -7  212.98   10.00
  -3   0  -7  198.88    8.10
  -3   0  -7  203.78    9.70
   2   0   7    1.00    1.50
   2   0   7    0.30    1.50
   2   0   7   -0.40    1.00
  -2   0  -7   -0.40    1.70
  -2   0  -7    0.70    0.90
   1   0   7  134.69    6.70
   1   0   7  139.29    6.40
  -1   0  -7  144.69    6.80
   0   0   7    0.00    1.30
   0   0   7   -0.70    1.30
   0   0  -7    0.70    1.20
   0   0  -7    0.80    1.10
  -1   0   7   54.09    3.90
  -1   0   7   58.49    4.10
  -1   0   7   57.69    4.10
   1   0  -7   49.70    3.90
   1   0  -7   55.19    3.90
  -2   0   7    0.60    1.60
  -2   0   7   -0.40    1.60
  -2   0   7   -0.90    1.50
  -2   0   7    1.50    1.70
   2   0  -7   -0.90    1.40
   2   0  -7    0.90    1.60
  -3   0   7  420.86   16.90
  -3   0   7  447.86   16.60
  -3   0   7  436.66   15.30
  -3   0   7  414.56   16.50
  -3   0   7  430.26   17.30
   3   0  -7  416.76   16.70
   3   0  -7  434.66   16.60
  -4   0   7    3.80    1.40
  -4   0   7    5.40    2.80
  -4   0   7   -0.90    2.00
  -4   0   7    1.70    1.60
  -4   0   7    6.70    2.70
   4   0  -7    0.10    2.10
   4   0  -7    0.70    2.10
  -5   0   7   -3.10    2.70
  -5   0   7   -1.20    1.60
  -5   0   7    1.00    2.50
  -5   0   7    0.20    1.30
   5   0  -7    1.30    2.30
  -6   0   7   -1.10    1.70
  -6   0   7    0.30    1.40
  -6   0   7    1.70    1.80
  -6   0   7   -0.60    1.20
   7   0   8   -1.10    1.00
  -7   0  -8   -0.20    0.90
  -7   0  -8    0.40    1.10
  -7   0  -8    0.50    1.00
  -7   0  -8    1.10    0.90
   6   0   8   -2.10    1.40
  -6   0  -8    0.20    1.30
  -6   0  -8    2.10    1.40
  -6   0  -8    2.70    1.50
  -6   0  -8   -0.20    1.40
  -6   0  -8    8.50    1.90
  -6   0  -8   -0.90    1.30
   5   0   8    2.30    1.50
  -5   0  -8   -0.90    1.70
  -5   0  -8    1.50    1.60
  -5   0  -8    0.20    1.50
  -5   0  -8    1.40    1.70
  -5   0  -8    0.10    1.50
  -5   0  -8    0.70    1.60
  -5   0  -8   -0.80    1.50
   4   0   8  166.28    7.10
   4   0   8  150.88    9.10
  -4   0  -8  159.28    7.00
   3   0   8    0.70    2.00
   3   0   8   -2.70    1.10
   3   0   8    0.80    2.20
  -3   0  -8    1.20    1.30
   2   0   8  276.67   11.40
   2   0   8  272.77   11.80
   2   0   8  268.47   10.00
  -2   0  -8  275.37   12.00
   1   0   8   -1.30    1.50
   1   0   8   -0.30    1.00
  -1   0  -8    1.90    1.60
   0   0   8   -0.20    1.30
   0   0  -8   -0.30    1.30
   0   0  -8    1.80    1.40
  -1   0   8    0.60    1.60
  -1   0   8    0.60    1.60
   1   0  -8    1.10    1.40
   1   0  -8   -0.40    1.30
  -2   0   8   27.20    3.40
  -2   0   8   28.20    4.20
  -2   0   8   24.00    3.70
  -2   0   8   28.80    2.70
   2   0  -8   26.60    3.50
   2   0  -8   18.70    3.10
  -3   0   8    1.30    2.00
  -3   0   8   -1.30    1.20
  -3   0   8    3.70    2.30
  -3   0   8   -2.50    2.00
   3   0  -8    1.00    2.00
   3   0  -8    1.00    1.90
  -4   0   8   -1.00    1.20
  -4   0   8    0.60    2.60
  -4   0   8    5.20    2.60
  -4   0   8   -1.70    1.60
   4   0  -8    3.00    2.40
   4   0  -8   -1.00    1.90
  -5   0   8    0.00    1.70
  -5   0   8   -2.20    1.70
  -5   0   8   -2.90    1.50
  -5   0   8   -0.80    1.40
  -5   0   8    1.40    2.70
  -5   0   8   -3.30    1.70
  -5   0   8   -0.70    1.40
   5   0  -8    0.50    2.50
  -6   0   8    2.40    1.50
  -6   0   8   -0.10    1.80
  -6   0   8    0.50    1.60
  -6   0   8    0.10    1.30
  -6   0   8    4.70    1.90
  -7   0   8   -0.70    1.20
   6   0   9   -2.40    1.40
  -6   0  -9   -0.20    1.30
  -6   0  -9   -0.50    1.30
  -6   0  -9   -1.10    1.20
  -6   0  -9    1.40    1.30
  -6   0  -9   -2.10    1.20
  -6   0  -9    0.50    1.20
   5   0   9  107.09    5.10
   5   0   9   94.09    5.10
  -5   0  -9  102.99    5.40
  -5   0  -9   96.89    5.30
  -5   0  -9  102.69    5.40
  -5   0  -9   99.69    5.30
  -5   0  -9   99.99    5.20
   4   0   9   -1.70    1.30
  -4   0  -9    2.10    1.60
  -4   0  -9    0.00    1.60
  -4   0  -9    0.20    1.60
  -4   0  -9    1.30    1.60
   3   0   9   67.19    6.00
   3   0   9   69.69    4.30
   2   0   9   -1.60    2.00
   2   0   9   -2.00    1.10
  -2   0  -9   -0.90    2.10
   1   0   9   73.79    5.20
   1   0   9   61.09    3.50
  -1   0  -9   68.59    5.10
   0   0   9    0.30    1.80
   0   0   9    0.10    1.00
   0   0  -9    0.20    1.60
   0   0  -9    2.60    1.70
  -1   0   9  458.95   16.20
  -1   0   9  458.75   17.90
  -1   0   9  474.75   18.10
   1   0  -9  453.25   17.60
   1   0  -9  482.35   17.60
  -2   0   9    2.70    2.20
  -2   0   9    2.50    1.90
  -2   0   9    0.30    2.20
  -2   0   9   -0.20    1.30
   2   0  -9    0.90    1.70
   2   0  -9    0.00    1.60
  -3   0   9   -3.00    2.30
  -3   0   9    2.30    2.10
  -3   0   9    2.70    1.70
  -3   0   9    2.60    2.60
  -3   0   9    1.50    1.30
   3   0  -9    1.60    2.20
   3   0  -9   -0.60    2.00
  -4   0   9    1.80    2.50
  -4   0   9    0.10    2.40
  -4   0   9   -3.20    1.50
  -4   0   9    0.40    1.40
   4   0  -9   -0.70    2.40
   4   0  -9   -1.40    2.40
  -5   0   9   25.00    2.60
  -5   0   9   19.10    2.90
  -5   0   9   29.10    2.80
  -5   0   9   19.80    2.80
  -5   0   9   34.50    4.70
  -5   0   9   25.30    3.50
  -5   0   9   27.80    3.20
  -5   0   9   26.60    3.30
   5   0  -9   25.60    4.40
  -6   0   9    0.70    1.40
  -6   0   9    1.20    1.60
  -6   0   9   -0.10    1.10
  -6   0   9   -1.40    1.20
  -6   0   9   -1.70    1.40
  -7   0   9    2.00    1.10
  -7   0   9    3.60    1.20
  -7   0   9    2.20    1.20
   6   0  10   18.30    1.90
   6   0  10   19.00    2.00
  -6   0 -10   12.20    1.70
  -6   0 -10   18.50    2.00
  -6   0 -10   13.60    1.70
  -6   0 -10   18.10    1.90
  -6   0 -10   15.90    1.80
   5   0  10    0.30    1.60
   5   0  10   -0.20    1.20
  -5   0 -10    0.40    1.40
  -5   0 -10    0.60    1.50
  -5   0 -10    0.40    1.40
  -5   0 -10    0.20    1.40
   4   0  10    6.50    2.00
   4   0  10    8.10    1.90
   4   0  10    5.00    1.80
  -4   0 -10    5.40    1.80
  -4   0 -10    6.70    1.90
  -4   0 -10    6.60    2.20
  -4   0 -10    6.40    2.10
   3   0  10   -1.70    1.50
   3   0  10   -4.90    1.60
   3   0  10    1.40    1.70
  -3   0 -10   -1.40    1.60
  -3   0 -10    1.70    1.50
  -3   0 -10   -0.70    1.60
   2   0  10  286.17   12.70
   2   0  10  269.87   10.20
  -2   0 -10  246.68   12.90
   1   0  10    0.80    1.30
   1   0  10    0.70    2.10
  -1   0 -10    1.90    2.00
  -1   0 -10   -1.40    1.20
   0   0  10    1.20    2.00
   0   0 -10    6.10    2.30
  -1   0  10    1.10    2.30
   1   0 -10    2.10    2.10
   1   0 -10   -0.60    1.60
  -2   0  10  123.09    5.60
  -2   0  10  121.19    8.00
  -2   0  10  125.89    6.20
  -2   0  10  117.69    8.10
   2   0 -10  133.39    7.80
   2   0 -10  124.59    7.40
  -3   0  10    1.40    2.20
  -3   0  10    1.30    1.60
  -3   0  10    3.30    3.00
  -3   0  10    0.30    1.40
   3   0 -10    1.20    2.40
   3   0 -10    2.60    2.10
  -4   0  10   16.40    2.80
  -4   0  10   14.60    2.60
  -4   0  10   19.90    2.60
  -4   0  10   25.30    3.40
  -4   0  10   20.70    3.20
  -4   0  10   18.20    3.90
  -4   0  10   20.80    2.40
  -4   0  10   15.10    2.50
   4   0 -10   23.00    4.00
  -5   0  10    0.10    1.80
  -5   0  10   -1.60    1.40
  -5   0  10    1.50    1.40
  -5   0  10   -0.40    1.80
  -5   0  10   -7.00    1.80
  -5   0  10   -3.00    1.50
  -5   0  10   -0.60    1.70
  -6   0  10  451.45   15.90
  -6   0  10  460.15   15.40
  -6   0  10  474.85   16.10
  -6   0  10  450.65   15.70
  -6   0  10  453.65   15.90
  -7   0  10    0.00    0.90
   5   0  11   16.60    2.20
  -5   0 -11   13.70    1.90
  -5   0 -11   17.50    2.20
  -5   0 -11   15.20    1.90
  -5   0 -11   15.10    2.00
   4   0  11    1.00    1.50
   4   0  11   -0.70    1.40
   4   0  11   -0.60    1.70
  -4   0 -11   -0.60    1.50
  -4   0 -11    0.70    1.50
  -4   0 -11    1.80    1.50
  -4   0 -11    1.00    1.50
   3   0  11   15.20    2.30
   3   0  11   14.90    2.30
   3   0  11   16.00    2.50
  -3   0 -11   13.20    2.40
  -3   0 -11   17.10    2.50
  -3   0 -11   13.90    2.10
  -3   0 -11   15.70    2.40
   2   0  11    1.00    1.50
   2   0  11    0.90    1.70
   2   0  11   -0.40    3.00
   2   0  11    1.10    1.60
  -2   0 -11    0.70    1.50
  -2   0 -11    0.30    1.50
  -2   0 -11    0.80    1.50
   1   0  11  108.79    5.20
   1   0  11  102.69    7.20
  -1   0 -11  115.19    7.40
  -1   0 -11  101.99    5.20
   0   0  11    4.30    2.80
   0   0  11   -0.40    1.30
   0   0 -11    5.90    1.50
   0   0 -11    1.60    2.20
  -1   0  11   43.50    5.40
  -1   0  11   56.39    3.60
   1   0 -11   54.59    5.80
   1   0 -11   51.69    5.70
   1   0 -11   57.39    3.60
  -2   0  11   -0.30    1.60
  -2   0  11   -0.30    3.00
  -2   0  11    2.10    1.40
   2   0 -11    1.60    1.30
   2   0 -11   -2.10    2.40
   2   0 -11    1.50    2.10
  -3   0  11  727.23   24.10
  -3   0  11  700.33   24.80
  -3   0  11  727.43   25.10
  -3   0  11  728.73   25.10
  -3   0  11  754.82   24.40
  -3   0  11  708.33   24.60
  -3   0  11  728.53   25.40
  -3   0  11  720.63   24.60
   3   0 -11  716.83   26.80
  -4   0  11   -0.80    1.40
  -4   0  11    0.30    1.60
  -4   0  11    1.20    1.40
  -4   0  11    1.90    1.80
  -4   0  11   -0.50    1.60
  -4   0  11   -0.10    1.70
  -4   0  11   -0.10    2.00
   4   0 -11    0.50    2.50
  -5   0  11   11.70    2.40
  -5   0  11   11.60    2.40
  -5   0  11   15.40    2.00
  -5   0  11   15.40    2.60
  -5   0  11   16.00    2.40
  -5   0  11   13.10    2.10
  -5   0  11    5.10    1.90
  -6   0  11   -1.00    1.00
  -6   0  11    0.30    1.00
  -6   0  11   -0.40    1.20
  -6   0  11   -1.40    1.10
   6   0 -11    0.90    1.10
   5   0  12   -2.10    1.20
   5   0  12   -1.20    1.20
  -5   0 -12   -0.40    1.00
  -5   0 -12   -0.30    1.00
  -5   0 -12   -1.80    1.00
  -5   0 -12   -1.70    1.10
   4   0  12  130.79    6.10
   4   0  12  133.69    6.00
  -4   0 -12  135.89    5.80
  -4   0 -12  134.49    6.00
  -4   0 -12  147.99    6.20
   3   0  12   -1.50    1.70
   3   0  12    1.30    1.50
   3   0  12   -0.60    1.40
  -3   0 -12    0.10    1.40
  -3   0 -12    2.20    1.50
  -3   0 -12    0.20    1.30
   2   0  12  103.09    5.40
   2   0  12  113.89    5.50
   2   0  12  101.59    5.60
  -2   0 -12  110.19    4.90
  -2   0 -12   96.99    5.20
  -2   0 -12  104.39    5.40
   1   0  12   -1.60    1.80
   1   0  12    1.00    1.30
   1   0  12    1.10    1.80
   1   0  12   -0.30    1.40
   1   0  12   -2.50    1.50
  -1   0 -12   -1.20    1.10
  -1   0 -12   -2.20    1.30
  -1   0 -12   -2.00    1.30
  -1   0 -12    0.30    2.80
   0   0  12   40.10    4.00
   0   0  12   45.30    4.10
   0   0  12   34.30    3.30
   0   0  12   43.60    5.50
   0   0 -12   38.30    4.90
   0   0 -12   43.10    3.80
   0   0 -12   43.20    3.40
  -1   0  12   -0.40    1.30
  -1   0  12    3.30    3.30
  -1   0  12    1.20    2.30
  -1   0  12    3.10    2.90
  -1   0  12   -2.50    1.70
  -1   0  12   -0.20    1.30
   1   0 -12    0.80    1.30
   1   0 -12   -0.60    2.20
  -2   0  12    1.30    1.30
  -2   0  12   -0.30    2.00
  -2   0  12    0.00    1.30
  -2   0  12    4.60    2.10
  -2   0  12   -2.30    1.60
   2   0 -12    1.40    2.50
   2   0 -12    0.00    1.30
  -3   0  12   -2.80    1.50
  -3   0  12    0.70    1.50
  -3   0  12   -1.40    1.90
  -3   0  12   -3.00    1.70
  -3   0  12   -0.30    1.70
  -3   0  12    3.10    2.10
  -3   0  12    0.80    1.70
  -3   0  12    1.20    1.40
   3   0 -12    2.20    2.40
   3   0 -12    0.40    1.40
  -4   0  12   23.90    3.00
  -4   0  12   20.10    2.60
  -4   0  12   25.10    3.40
  -4   0  12   26.40    3.20
  -4   0  12   25.70    2.60
  -4   0  12   22.90    2.90
  -4   0  12   23.10    2.30
   4   0 -12   25.70    2.60
  -5   0  12    0.70    1.20
  -5   0  12    0.30    1.20
  -5   0  12   -1.60    1.30
  -5   0  12   -2.20    1.30
  -5   0  12   -1.30    1.30
  -5   0  12   -0.80    1.60
   5   0 -12    1.00    1.20
  -6   0  12  219.98    8.30
  -6   0  12  237.28    8.20
  -6   0  12  219.68    7.90
  -6   0  12  230.08    8.30
   4   0  13    0.00    1.30
   4   0  13    0.80    1.40
  -4   0 -13   -2.40    1.30
  -4   0 -13    0.70    1.30
  -4   0 -13   -0.70    1.00
   3   0  13   49.00    3.80
   3   0  13   50.19    3.50
   3   0  13   56.79    3.80
  -3   0 -13   49.60    3.60
  -3   0 -13   57.59    3.20
  -3   0 -13   51.99    3.70
   2   0  13    0.70    1.70
   2   0  13    0.80    1.70
   2   0  13   -0.90    1.50
  -2   0 -13   -1.70    1.10
  -2   0 -13   -1.70    1.40
  -2   0 -13   -2.20    1.40
   1   0  13  127.59    6.50
   1   0  13  142.09    6.70
  -1   0 -13  135.69    6.30
  -1   0 -13  145.09    6.40
   0   0  13   -1.30    1.20
   0   0  13    1.00    1.80
   0   0  13    0.20    1.40
   0   0  13    0.00    1.70
   0   0 -13    0.80    1.40
   0   0 -13    0.10    1.50
   0   0 -13    0.30    2.70
  -1   0  13    6.40    1.80
  -1   0  13    6.80    1.80
  -1   0  13    7.50    1.70
  -1   0  13    5.40    2.30
  -1   0  13    5.10    2.00
   1   0 -13    9.00    2.00
   1   0 -13    9.70    3.10
   1   0 -13    6.30    1.70
  -2   0  13    0.00    1.90
  -2   0  13    2.00    2.10
  -2   0  13    1.00    1.30
  -2   0  13    1.60    1.40
   2   0 -13   -1.20    1.30
   2   0 -13    1.80    2.60
  -3   0  13   42.30    3.20
  -3   0  13   38.50    3.40
  -3   0  13   36.40    3.60
  -3   0  13   34.40    2.90
  -3   0  13   41.10    3.90
  -3   0  13   38.20    3.40
  -3   0  13   41.20    4.10
   3   0 -13   38.30    3.10
  -4   0  13   -0.70    1.30
  -4   0  13    0.00    1.30
  -4   0  13   -2.90    1.40
  -4   0  13    2.30    1.70
  -4   0  13    1.80    1.20
  -4   0  13   -1.60    1.20
  -4   0  13   -0.20    1.50
  -4   0  13   -0.80    1.70
   4   0 -13    1.00    1.20
  -5   0  13   41.80    3.00
  -5   0  13   41.40    2.60
  -5   0  13   39.40    2.70
  -5   0  13   42.80    2.90
  -5   0  13   40.50    2.90
  -5   0  13   40.40    3.20
   5   0 -13   42.20    2.70
   4   0  14   14.80    1.60
   3   0  14   -1.30    1.30
   3   0  14    2.20    1.40
  -3   0 -14   -0.10    0.90
   2   0  14   19.80    2.60
   1   0  14   -1.20    1.60
   1   0  14    1.30    1.80
   0   0  14   51.39    3.50
   0   0  14   54.29    4.10
   0   0  14   56.29    3.20
   0   0  14   49.90    4.10
   0   0 -14   54.79    3.70
   0   0 -14   60.69    3.60
  -1   0  14   -0.80    1.80
  -1   0  14   -3.00    1.60
  -1   0  14   -1.60    1.30
  -1   0  14    0.70    1.30
   1   0 -14    0.00    1.30
   1   0 -14   -0.20    1.30
  -2   0  14   44.90    4.00
  -2   0  14   38.50    3.10
  -2   0  14   34.60    3.10
  -2   0  14   36.90    3.70
  -2   0  14   42.20    3.00
   2   0 -14   33.50    3.00
   2   0 -14   36.60    3.00
  -3   0  14    0.30    1.20
  -3   0  14   -0.30    1.30
  -3   0  14    1.80    1.70
  -3   0  14    2.50    1.80
  -3   0  14   -1.00    1.40
   3   0 -14    0.30    1.10
   3   0 -14    1.20    1.30
  -4   0  14  253.47    9.10
  -4   0  14  262.77    9.30
  -4   0  14  258.07    9.50
  -4   0  14  247.98    9.30
  -4   0  14  263.07    9.20
  -4   0  14  248.28    9.40
  -4   0  14  243.08    9.80
   4   0 -14  255.87    9.20
  -5   0  14   -0.70    0.90
  -5   0  14    0.70    1.10
  -5   0  14    0.70    1.00
  -5   0  14    0.00    0.90
  -5   0  14    1.20    0.90
   5   0 -14   -0.50    0.80
   3   0  15   12.30    1.60
   3   0  15   20.10    1.90
   2   0  15   -2.80    1.30
   1   0  15  212.78    8.40
   1   0  15  221.58    8.40
   0   0  15    0.40    1.60
   0   0  15    0.80    1.60
   0   0 -15    1.40    1.30
   0   0 -15    0.30    1.20
  -1   0  15   13.00    2.20
  -1   0  15    8.30    1.60
  -1   0  15   14.50    1.90
  -1   0  15   12.10    2.30
   1   0 -15   12.50    1.90
   1   0 -15   10.40    1.70
  -2   0  15   -0.30    1.30
  -2   0  15   -1.40    1.50
  -2   0  15    0.70    1.20
  -2   0  15   -0.60    1.70
   2   0 -15    0.40    1.20
   2   0 -15    0.00    1.10
  -3   0  15    0.30    1.10
  -3   0  15    2.10    1.30
  -3   0  15   -0.70    1.50
  -3   0  15    0.80    1.40
  -3   0  15    0.10    1.20
   3   0 -15   -1.40    1.00
   3   0 -15   -0.60    1.00
  -4   0  15   -1.40    1.30
  -4   0  15    0.60    1.20
  -4   0  15   -0.10    1.10
  -4   0  15    0.90    0.90
  -4   0  15    1.10    1.00
   4   0 -15   -0.70    0.90
   2   0  16    8.70    1.50
   1   0  16   -0.50    1.30
   0   0  16    5.30    1.50
   0   0  16    3.00    1.50
   0   0 -16    3.10    1.20
  -1   0  16    0.00    1.30
  -1   0  16    2.40    1.00
  -1   0  16    0.10    1.40
   1   0 -16    1.10    1.00
  -2   0  16   33.60    2.90
  -2   0  16   38.40    2.40
  -2   0  16   36.20    2.90
  -2   0  16   36.20    2.40
   2   0 -16   32.40    2.30
  -3   0  16    0.80    1.20
  -3   0  16   -1.90    1.10
  -3   0  16   -0.10    0.90
  -3   0  16    1.40    1.00
   3   0 -16    0.10    0.90
  -1   0  17    9.00    1.40
  -1   1  17   15.50    1.70
   3  -1 -16   16.00    1.50
  -3   1  16   12.50    1.40
  -3   1  16   14.10    1.40
  -3   1  16   13.30    1.70
  -3   1  16   13.80    1.80
   2  -1 -16    1.60    1.00
  -2   1  16    1.80    1.10
  -2   1  16    0.40    1.40
  -2   1  16    2.80    1.40
  -2   1  16    2.80    1.10
   1  -1 -16    1.20    1.00
  -1   1  16    0.30    1.40
  -1   1  16    1.40    1.00
   0   1  16    0.90    1.50
   0   1  16    1.10    1.30
   1   1  16   25.00    2.50
   1   1  16   21.80    2.10
   2   1  16    1.20    1.20
   4  -1 -15    0.30    0.90
  -4   1  15    0.00    0.90
  -4   1  15   -1.10    1.10
  -4   1  15   -1.30    1.00
   3  -1 -15    9.00    1.50
   3  -1 -15    8.90    1.50
  -3   1  15    4.50    1.70
  -3   1  15    5.00    1.80
  -3   1  15    5.30    1.50
  -3   1  15    5.60    1.30
  -3   1  15   10.10    1.70
   2  -1 -15    0.10    1.20
   2  -1 -15    2.60    1.30
  -2   1  15    0.90    1.60
  -2   1  15    0.30    1.50
  -2   1  15    1.00    1.30
  -2   1  15    0.60    1.10
   1  -1 -15   70.29    3.70
   1  -1 -15   68.99    3.80
  -1   1  15   73.89    3.80
  -1   1  15   72.79    3.60
  -1   1  15   69.39    4.40
  -1   1  15   56.39    4.90
   0  -1 -15   27.80    2.60
   0   1  15   27.10    2.80
   0   1  15   31.40    3.20
   1   1  15    3.40    1.60
   1   1  15    3.20    1.60
   2   1  15   46.80    3.30
   3   1  15   81.39    3.80
  -5   1  14    1.10    1.10
  -5   1  14    2.00    1.00
  -5   1  14    0.70    0.90
  -5   1  14    0.30    1.00
  -5   1  14   -0.20    1.00
   4  -1 -14    0.80    1.10
  -4   1  14   -2.30    1.40
  -4   1  14   -0.60    1.20
  -4   1  14    2.90    2.30
  -4   1  14    1.50    1.20
  -4   1  14    1.40    1.30
  -4   1  14    0.10    1.30
  -4   1  14    2.00    1.10
   3  -1 -14   30.40    2.70
  -3   1  14   32.40    3.40
  -3   1  14   28.80    2.50
  -3   1  14   28.00    2.90
  -3   1  14   28.80    2.70
  -3   1  14   30.80    3.10
   2  -1 -14   21.30    2.40
   2  -1 -14   20.70    2.30
  -2   1  14   17.30    2.30
  -2   1  14   22.50    2.90
  -2   1  14   21.70    2.30
  -2   1  14   17.50    2.70
  -2   1  14   22.40    2.50
   1  -1 -14    2.20    1.40
   1  -1 -14    0.10    1.30
  -1   1  14    0.60    1.80
  -1   1  14    0.60    1.80
  -1   1  14   -0.20    1.30
  -1   1  14    1.30    1.30
   0  -1 -14   42.80    3.20
   0  -1 -14   51.79    3.50
   0   1  14   49.20    3.00
   0   1  14   44.80    3.90
   0   1  14   47.90    3.30
   0   1  14   49.99    3.90
   1   1  14   86.29    4.90
   1   1  14   96.59    5.10
  -2  -1 -14   23.90    2.60
   2   1  14   28.10    2.80
  -3  -1 -14   19.70    1.60
  -3  -1 -14   20.90    2.20
   3   1  14   17.70    2.10
   3   1  14   18.20    2.10
  -4  -1 -14   15.70    1.60
   4   1  14   15.50    1.60
   4   1  14   16.70    2.00
   5  -1 -13   23.00    2.20
  -5   1  13   24.70    2.30
  -5   1  13   17.90    2.00
  -5   1  13   22.80    2.40
  -5   1  13   28.60    2.50
  -5   1  13   22.60    2.60
  -5   1  13   22.30    2.10
   4  -1 -13    8.00    1.70
  -4   1  13    2.60    1.30
  -4   1  13    8.70    2.00
  -4   1  13    4.40    1.80
  -4   1  13    6.80    2.00
  -4   1  13    3.60    1.50
  -4   1  13    4.40    1.50
  -4   1  13    6.30    1.80
   3  -1 -13   22.80    2.50
  -3   1  13   20.80    2.80
  -3   1  13   24.40    3.00
  -3   1  13   21.00    2.30
  -3   1  13   25.20    3.40
  -3   1  13   25.30    2.60
  -3   1  13   17.90    2.70
   2  -1 -13    6.00    2.90
  -2   1  13    3.40    2.10
  -2   1  13    0.50    1.30
  -2   1  13    1.30    1.50
  -2   1  13    0.30    2.00
   1  -1 -13  189.08    7.90
   1  -1 -13  195.28   10.30
   1  -1 -13  202.78    8.20
  -1   1  13  198.18    8.00
  -1   1  13  197.48    8.40
  -1   1  13  202.88    7.90
  -1   1  13  190.18    8.90
  -1   1  13  203.78    8.70
  -1   1  13  204.18    8.20
   0  -1 -13  391.16   13.90
   0  -1 -13  349.47   16.00
   0  -1 -13  377.46   13.50
   0   1  13  395.66   14.00
   0   1  13  386.56   13.30
   0   1  13  379.46   13.50
   0   1  13  385.76   14.20
  -1  -1 -13    3.00    1.70
  -1  -1 -13    1.70    1.00
   1   1  13    1.00    1.70
   1   1  13    3.80    1.90
  -2  -1 -13   10.00    2.00
  -2  -1 -13   10.60    2.20
   2   1  13    8.30    1.90
   2   1  13   13.60    2.30
   2   1  13   10.10    2.60
  -3  -1 -13    2.80    1.40
  -3  -1 -13   -2.90    1.30
  -3  -1 -13    2.30    1.30
   3   1  13    0.60    1.60
   3   1  13   -0.70    1.50
  -4  -1 -13   97.59    4.60
  -4  -1 -13  103.49    4.80
  -4  -1 -13  102.99    4.30
   4   1  13   95.89    4.70
   4   1  13  104.39    4.70
  -6   1  12   78.99    3.90
  -6   1  12   81.79    3.50
  -6   1  12   78.99    3.80
  -6   1  12   87.49    3.90
   5  -1 -12   19.90    2.20
  -5   1  12   23.60    2.30
  -5   1  12   22.00    2.10
  -5   1  12   16.10    2.40
  -5   1  12   23.10    2.80
  -5   1  12   20.90    2.40
  -5   1  12   26.50    2.80
   4  -1 -12   85.29    4.70
  -4   1  12   96.49    5.70
  -4   1  12   97.09    5.40
  -4   1  12   95.79    4.60
  -4   1  12   89.09    5.00
  -4   1  12   85.09    4.70
  -4   1  12   87.69    5.20
  -4   1  12   86.69    4.80
   3  -1 -12   40.30    3.30
   3  -1 -12   40.10    5.00
  -3   1  12   38.50    3.50
  -3   1  12   38.10    3.10
  -3   1  12   32.70    3.60
  -3   1  12   39.30    3.90
  -3   1  12   46.00    4.20
  -3   1  12   40.60    3.40
  -3   1  12   37.80    4.20
  -3   1  12   39.90    3.90
   2  -1 -12   80.09    6.30
   2  -1 -12   75.39    4.40
  -2   1  12   75.79    5.20
  -2   1  12   77.09    4.40
  -2   1  12   66.69    5.20
  -2   1  12   83.69    4.90
  -2   1  12   77.79    4.20
   1  -1 -12  145.79    6.30
   1  -1 -12  138.49    8.30
   1  -1 -12  121.69    8.90
  -1   1  12  130.39    9.00
  -1   1  12  141.39    6.10
  -1   1  12  151.08    6.40
  -1   1  12  134.89    8.40
  -1   1  12  134.49    6.90
  -1   1  12  141.49    8.10
   0  -1 -12  102.19    5.10
   0  -1 -12   97.29    5.10
   0  -1 -12   98.89    7.20
   0   1  12   97.89    5.60
   0   1  12   99.29    4.90
   0   1  12   98.79    7.90
   0   1  12  100.89    5.70
  -1  -1 -12  228.68    8.30
  -1  -1 -12  217.18    8.90
   1   1  12  220.48    9.00
   1   1  12  218.18    9.00
   1   1  12  223.58    9.30
   1   1  12  229.78    8.10
  -2  -1 -12   96.79    4.60
  -2  -1 -12   85.19    5.00
  -2  -1 -12   97.39    5.10
   2   1  12   94.59    5.30
   2   1  12   94.39    5.10
   2   1  12   97.49    5.00
  -3  -1 -12  118.39    5.90
  -3  -1 -12  121.69    5.90
  -3  -1 -12  120.99    5.50
   3   1  12  119.89    5.70
   3   1  12  124.49    5.70
   3   1  12  122.09    6.00
  -4  -1 -12   11.10    1.90
  -4  -1 -12    6.80    1.80
  -4  -1 -12    8.10    1.70
   4   1  12    9.30    2.00
   4   1  12    9.40    1.90
  -5  -1 -12    3.00    1.20
  -5  -1 -12    0.90    1.20
  -5  -1 -12    2.80    1.20
   5   1  12    4.50    1.40
  -6   1  11    8.30    1.40
  -6   1  11    9.50    1.70
  -6   1  11    5.00    1.50
  -6   1  11    6.60    1.60
  -6   1  11    6.50    1.40
  -5   1  11    7.90    2.20
  -5   1  11    4.60    1.80
  -5   1  11    5.50    2.10
  -5   1  11    3.00    1.70
  -5   1  11    4.20    2.00
  -5   1  11    5.30    1.60
  -5   1  11    4.90    1.60
   4  -1 -11   27.30    4.40
  -4   1  11   19.40    2.80
  -4   1  11   23.90    2.90
  -4   1  11   21.50    3.30
  -4   1  11   17.90    2.90
  -4   1  11   23.10    2.70
  -4   1  11   21.20    3.10
  -4   1  11   14.30    3.90
  -4   1  11   17.90    2.30
   3  -1 -11    5.20    2.80
  -3   1  11    6.30    2.10
  -3   1  11    7.60    1.80
  -3   1  11    3.30    2.20
  -3   1  11    7.70    1.90
  -3   1  11    4.80    2.00
  -3   1  11    2.20    2.60
  -3   1  11    3.20    2.30
  -3   1  11    6.10    2.20
   2  -1 -11  465.85   18.80
   2  -1 -11  474.45   19.30
   2  -1 -11  497.35   16.70
  -2   1  11  481.45   20.10
  -2   1  11  465.95   16.50
  -2   1  11  473.55   17.20
   1  -1 -11  279.47   12.70
   1  -1 -11  278.07   10.40
   1  -1 -11  272.77   12.30
  -1   1  11  279.27   13.30
  -1   1  11  281.47   10.40
   0  -1 -11  130.39    7.60
   0  -1 -11  122.69    5.70
   0   1  11  113.49    5.50
   0   1  11  122.69    7.90
  -1  -1 -11   12.00    3.10
   1   1  11    5.90    1.70
   1   1  11   11.20    3.40
  -2  -1 -11   37.20    3.60
  -2  -1 -11   38.00    3.60
  -2  -1 -11   39.50    3.40
   2   1  11   61.09    9.20
   2   1  11   39.50    3.70
   2   1  11   39.30    3.60
   2   1  11   48.60    3.60
  -3  -1 -11    2.80    1.70
  -3  -1 -11    3.20    1.50
  -3  -1 -11    5.90    1.90
  -3  -1 -11    3.20    1.70
   3   1  11    6.90    1.90
   3   1  11    5.90    1.90
   3   1  11    7.40    2.00
  -4  -1 -11   19.00    2.60
  -4  -1 -11   11.50    2.80
  -4  -1 -11   18.30    2.30
  -4  -1 -11   11.30    2.20
   4   1  11   21.30    2.60
   4   1  11   16.90    2.20
   4   1  11   14.30    2.10
  -5  -1 -11    7.50    1.70
  -5  -1 -11    5.50    1.60
  -5  -1 -11    5.20    1.50
  -5  -1 -11    6.00    1.70
   5   1  11    8.40    1.90
  -7   1  10   17.50    1.80
  -6   1  10   15.30    2.20
  -6   1  10   13.80    2.00
  -6   1  10   15.80    1.90
  -6   1  10   16.40    2.30
  -6   1  10   12.60    2.10
  -5   1  10  397.36   14.50
  -5   1  10  387.16   14.80
  -5   1  10  399.86   14.50
  -5   1  10  387.06   13.80
  -5   1  10  377.76   14.10
  -5   1  10  388.66   14.60
  -5   1  10  400.86   14.80
   4  -1 -10   46.20    5.30
  -4   1  10   43.40    4.50
  -4   1  10   45.10    4.10
  -4   1  10   41.60    3.90
  -4   1  10   42.50    3.30
  -4   1  10   41.70    3.90
  -4   1  10   45.50    3.50
  -4   1  10   37.10    3.90
  -4   1  10   36.20    5.00
   3  -1 -10   12.20    3.10
   3  -1 -10    8.30    2.80
  -3   1  10    9.00    3.60
  -3   1  10   12.30    2.50
  -3   1  10   12.20    2.10
  -3   1  10   11.60    3.70
  -3   1  10    8.00    3.10
   2  -1 -10   85.99    6.30
   2  -1 -10   84.49    6.00
  -2   1  10   78.39    6.50
  -2   1  10   96.49    7.10
  -2   1  10   85.29    4.50
  -2   1  10   74.59    4.80
   1  -1 -10   81.09    5.90
   1  -1 -10   91.19    5.90
  -1   1  10   87.09    6.50
   0  -1 -10  112.19    6.80
   0   1  10  127.79    7.50
  -1  -1 -10    3.50    2.40
   1   1  10    5.80    1.50
   1   1  10    4.90    2.60
   2   1  10  111.09    5.40
   2   1  10  102.59    7.10
  -3  -1 -10  598.14   20.80
  -3  -1 -10  618.24   20.90
  -3  -1 -10  587.84   20.40
   3   1  10  590.64   20.50
   3   1  10  608.44   20.70
  -4  -1 -10   37.20    3.30
  -4  -1 -10   40.30    3.60
  -4  -1 -10   24.60    2.90
  -4  -1 -10   33.40    3.40
  -4  -1 -10   37.30    4.80
   4   1  10   25.60    2.70
   4   1  10   38.40    3.30
   4   1  10   33.70    3.40
  -5  -1 -10   49.90    3.60
  -5  -1 -10   48.90    3.60
  -5  -1 -10   52.59    3.70
  -5  -1 -10   46.80    3.30
   5   1  10   43.30    3.20
   5   1  10   47.10    3.60
  -6  -1 -10    4.20    1.30
  -6  -1 -10    5.40    1.40
  -6  -1 -10    4.20    1.70
  -6  -1 -10    2.30    1.20
  -6  -1 -10    3.30    1.20
   6   1  10    4.40    1.40
  -7   1   9   13.30    1.80
  -7   1   9   12.40    1.60
  -7   1   9   12.70    1.40
  -6   1   9   11.70    2.20
  -6   1   9   17.90    2.50
  -6   1   9   13.60    1.90
  -6   1   9   12.60    2.20
  -6   1   9   13.50    2.00
   5  -1  -9  134.49    8.30
  -5   1   9  141.89    6.70
  -5   1   9  128.19    6.70
  -5   1   9  128.89    6.20
  -5   1   9  128.19    6.80
  -5   1   9  132.49    6.70
  -5   1   9  129.19    6.00
  -5   1   9  130.29    8.50
   4  -1  -9   -0.30    2.10
   4  -1  -9    0.50    2.50
  -4   1   9   -1.50    1.40
  -4   1   9    0.40    2.60
  -4   1   9    0.00    1.60
  -4   1   9   -1.80    2.70
   3  -1  -9   24.10    3.90
   3  -1  -9   22.30    3.80
  -3   1   9   25.00    4.40
  -3   1   9   21.00    3.80
  -3   1   9   23.60    4.30
  -3   1   9   27.20    3.30
  -3   1   9   23.20    2.60
   2  -1  -9  201.98    9.60
   2  -1  -9  190.68    9.30
  -2   1   9  225.78   10.50
  -2   1   9  197.78    9.50
  -2   1   9  160.38    9.40
  -2   1   9  188.48    8.00
   1  -1  -9  609.94   21.80
   1  -1  -9  626.24   22.10
  -1   1   9  567.24   20.30
  -1   1   9  615.24   22.50
   0  -1  -9  271.07   11.50
   0  -1  -9  275.27   11.60
   0   1   9  295.37   12.10
  -1  -1  -9    7.40    2.30
   1   1   9   11.40    2.70
   1   1   9   16.00    1.90
   2   1   9   -0.80    1.20
   2   1   9    4.60    2.50
   3   1   9   46.20    5.20
   3   1   9   45.00    5.30
   3   1   9   51.39    3.70
  -4  -1  -9    2.60    1.70
  -4  -1  -9   -1.50    1.60
  -4  -1  -9    2.30    1.80
  -4  -1  -9    0.40    1.40
  -4  -1  -9   -0.70    1.40
   4   1   9   -2.40    1.50
   4   1   9    2.40    1.60
  -5  -1  -9    3.00    1.60
  -5  -1  -9    0.30    1.50
  -5  -1  -9    2.60    1.70
  -5  -1  -9    1.90    1.90
  -5  -1  -9    2.10    1.60
  -5  -1  -9    3.10    1.70
  -5  -1  -9    2.80    1.70
   5   1   9    2.20    1.70
   5   1   9    2.80    1.60
  -6  -1  -9   42.20    3.10
  -6  -1  -9   36.50    2.90
  -6  -1  -9   31.10    2.90
  -6  -1  -9   31.30    2.90
  -6  -1  -9   36.80    2.90
  -6  -1  -9   38.90    3.00
   6   1   9   37.40    3.00
  -7   1   8    7.20    1.30
  -7   1   8    8.80    1.60
  -7   1   8    7.80    2.00
  -6   1   8   23.30    2.80
  -6   1   8   22.30    2.70
  -6   1   8   21.50    2.50
  -6   1   8   19.20    2.30
   5  -1  -8  169.38    9.60
  -5   1   8  165.78    7.70
  -5   1   8  165.68    8.00
  -5   1   8  165.38    7.70
  -5   1   8  172.88    7.40
  -5   1   8  160.88    9.50
  -5   1   8  162.98    7.80
  -5   1   8  163.28    7.10
   4  -1  -8  140.29    8.50
   4  -1  -8  151.38    8.70
  -4   1   8  142.19    8.90
  -4   1   8  144.99    8.60
  -4   1   8  146.59    7.10
  -4   1   8  148.99    6.60
  -4   1   8  145.29    9.20
   3  -1  -8   27.40    3.90
   3  -1  -8   25.50    3.80
  -3   1   8   28.40    4.40
  -3   1   8   20.50    4.00
  -3   1   8   23.90    3.60
  -3   1   8   28.10    2.90
   2  -1  -8  106.09    6.30
   2  -1  -8  106.39    6.20
  -2   1   8   89.89    6.20
  -2   1   8  115.49    6.40
  -2   1   8  110.29    5.20
  -2   1   8  102.99    6.70
   1  -1  -8    3.50    1.60
   1  -1  -8    1.80    1.60
  -1   1   8    6.00    2.00
  -1   1   8    3.30    2.00
  -1   1   8    3.50    1.90
   0  -1  -8  255.57   10.20
   0  -1  -8  243.88   10.10
   0   1   8  238.88   10.40
  -1  -1  -8  295.57   12.20
   1   1   8  299.27   10.70
   1   1   8  291.57   11.90
   1   1   8  328.37   12.50
  -2  -1  -8   31.10    2.60
   2   1   8   33.50    2.80
   2   1   8   39.00    4.10
   2   1   8   31.60    4.00
  -3  -1  -8   93.39    4.80
   3   1   8   82.59    6.20
   3   1   8   99.09    6.50
   3   1   8   89.79    4.70
  -4  -1  -8   81.99    6.40
  -4  -1  -8   74.59    4.60
  -4  -1  -8   75.09    4.40
  -4  -1  -8   87.79    6.20
   4   1   8   72.69    6.40
   4   1   8   80.19    4.70
   4   1   8   70.09    6.30
  -5  -1  -8   22.20    2.80
  -5  -1  -8   20.30    2.60
  -5  -1  -8   22.70    2.80
  -5  -1  -8   23.20    3.00
  -5  -1  -8   15.40    2.60
  -5  -1  -8   17.60    2.60
  -5  -1  -8   21.00    2.90
   5   1   8   21.30    2.60
  -6  -1  -8    4.10    1.70
  -6  -1  -8    4.80    1.60
  -6  -1  -8    3.30    1.50
  -6  -1  -8    3.30    1.60
  -6  -1  -8    3.50    1.60
  -6  -1  -8    4.80    1.70
   6   1   8    5.80    1.70
  -7  -1  -8    1.40    1.10
  -7  -1  -8    5.20    1.20
  -7  -1  -8    3.70    1.10
  -7  -1  -8    4.20    1.30
   7   1   8    5.10    1.20
  -7   1   7    0.20    1.20
  -7   1   7    0.70    1.10
  -7   1   7   -0.70    1.10
  -6   1   7   98.19    4.70
  -6   1   7   91.89    5.20
  -6   1   7   95.89    5.40
  -6   1   7   82.49    4.80
   5  -1  -7   53.69    6.10
   5  -1  -7   57.19    6.90
  -5   1   7   59.29    5.90
  -5   1   7   45.20    5.50
  -5   1   7   50.39    4.60
  -5   1   7   54.39    5.00
  -5   1   7   52.59    4.20
  -5   1   7   38.50    5.80
  -5   1   7   49.60    3.60
   4  -1  -7   11.70    2.90
  -4   1   7   19.50    3.80
  -4   1   7   12.60    3.10
  -4   1   7   16.00    2.20
  -4   1   7   17.60    3.80
  -4   1   7   15.90    2.50
   3  -1  -7   85.69    5.80
   3  -1  -7   95.09    6.00
  -3   1   7   95.39    5.90
  -3   1   7   90.59    6.50
  -3   1   7   91.99    4.80
  -3   1   7   90.99    6.30
   2  -1  -7  763.12   26.00
   2  -1  -7  762.72   26.30
  -2   1   7  746.13   26.50
  -2   1   7  721.23   25.90
  -2   1   7  764.72   26.50
   1  -1  -7   26.80    3.00
   1  -1  -7   37.40    3.30
  -1   1   7   33.70    3.40
  -1   1   7   36.90    3.40
  -1   1   7   30.50    3.20
   0  -1  -7   37.60    3.20
   0  -1  -7   43.60    3.30
   0   1   7   40.00    3.20
   0   1   7   44.60    3.50
  -1  -1  -7  135.89    6.60
   1   1   7  139.89    6.50
   1   1   7  134.09    6.70
  -2  -1  -7  478.65   17.50
  -2  -1  -7  449.86   15.80
   2   1   7  478.55   17.30
   2   1   7  463.65   15.80
   2   1   7  478.75   17.50
  -3  -1  -7   63.99    5.10
  -3  -1  -7   57.69    3.70
  -3  -1  -7   61.89    3.50
   3   1   7   67.49    5.10
   3   1   7   62.09    4.90
   3   1   7   58.59    3.60
  -4  -1  -7  134.79    8.30
  -4  -1  -7  136.69    6.20
  -4  -1  -7  133.89    6.20
   4   1   7  133.89    8.00
   4   1   7  133.99    6.20
   4   1   7  145.09    8.30
  -5  -1  -7    2.20    1.70
  -5  -1  -7    2.00    1.60
  -5  -1  -7   -1.00    1.50
  -5  -1  -7    4.60    1.80
  -5  -1  -7   -0.10    1.70
  -5  -1  -7    4.60    2.00
  -5  -1  -7    1.40    1.70
  -5  -1  -7    4.30    1.80
   5   1   7   -0.10    1.60
  -6  -1  -7   18.40    2.40
  -6  -1  -7   20.00    2.60
  -6  -1  -7   17.50    2.50
  -6  -1  -7   19.90    2.70
  -6  -1  -7   18.70    2.50
  -6  -1  -7   17.00    2.40
  -6  -1  -7   18.50    2.40
  -7  -1  -7    0.50    1.20
  -7  -1  -7    0.40    1.10
  -7  -1  -7   -1.10    1.10
  -7  -1  -7    0.30    1.20
  -7  -1  -7   -0.20    1.30
  -7   1   6   40.70    2.80
   6  -1  -6   13.40    3.70
  -6   1   6    3.70    3.00
  -6   1   6    9.20    1.80
  -6   1   6    7.60    2.10
  -6   1   6    7.00    1.90
   5  -1  -6    3.60    2.80
  -5   1   6    3.10    3.00
  -5   1   6    0.20    2.50
  -5   1   6    1.10    1.40
  -5   1   6    1.30    2.90
   4  -1  -6    1.90    2.10
  -4   1   6    6.20    2.50
  -4   1   6    5.80    1.80
  -4   1   6    9.10    3.00
  -4   1   6    8.40    2.60
   3  -1  -6   11.20    2.30
  -3   1   6   15.50    2.90
  -3   1   6   14.50    2.00
  -3   1   6   10.20    2.20
  -3   1   6   14.10    2.60
  -3   1   6   16.20    3.10
   2  -1  -6  138.49    6.70
   2  -1  -6  132.79    6.60
  -2   1   6  143.79    6.70
  -2   1   6  136.99    6.90
  -2   1   6  127.69    6.40
  -2   1   6  134.39    6.80
   1  -1  -6    0.90    1.10
   1  -1  -6    2.30    1.30
  -1   1   6    1.90    1.30
  -1   1   6    1.80    1.30
  -1   1   6    1.40    1.40
  -1   1   6    2.80    1.40
   0  -1  -6    2.20    1.20
   0  -1  -6    2.00    2.30
   0   1   6    1.50    1.20
   0   1   6    1.40    1.20
   0   1   6    3.20    1.50
  -1  -1  -6  973.10   35.00
  -1  -1  -6  988.20   32.60
   1   1   6  996.30   32.80
   1   1   6 1001.90   32.50
  -2  -1  -6    9.50    2.10
  -2  -1  -6    8.80    2.10
   2   1   6    5.30    1.80
   2   1   6    7.80    2.00
  -3  -1  -6   -0.30    1.10
  -3  -1  -6    0.50    0.90
  -3  -1  -6    2.90    1.80
  -3  -1  -6    2.50    1.80
   3   1   6    1.80    1.80
   3   1   6   -1.40    1.40
   3   1   6    3.00    1.10
  -4  -1  -6   -0.80    2.00
  -4  -1  -6    2.60    1.30
  -4  -1  -6    4.10    2.50
  -4  -1  -6    0.90    1.20
   4   1   6   -0.30    2.20
   4   1   6    4.40    2.50
   4   1   6    0.50    1.20
  -5  -1  -6    3.20    1.80
  -5  -1  -6    4.50    1.80
  -5  -1  -6    6.40    2.20
  -5  -1  -6    4.10    1.90
  -5  -1  -6    3.20    1.60
  -5  -1  -6    3.40    1.80
  -5  -1  -6    2.50    1.80
  -5  -1  -6    2.20    1.80
   5   1   6    0.60    1.50
  -6  -1  -6    3.80    1.70
  -6  -1  -6    2.00    1.60
  -6  -1  -6    4.70    1.90
  -6  -1  -6    3.60    1.90
  -6  -1  -6    3.00    1.80
  -6  -1  -6    1.70    1.80
  -6  -1  -6    2.40    1.80
  -7  -1  -6   19.30    2.20
  -7  -1  -6   18.40    2.10
  -7  -1  -6   19.50    2.20
  -7  -1  -6   20.50    2.20
  -7  -1  -6   21.70    2.40
  -6   1   5   39.00    5.20
  -6   1   5   47.50    3.30
  -6   1   5   44.00    4.20
   5  -1  -5   26.60    4.80
  -5   1   5   39.20    5.40
  -5   1   5   37.60    3.10
  -5   1   5   33.90    5.00
  -5   1   5   33.50    4.60
   4  -1  -5 1668.73   54.69
  -4   1   5 1627.14   54.69
  -4   1   5 1615.94   54.99
  -4   1   5 1627.54   54.59
  -4   1   5 1643.94   54.19
  -4   1   5 1628.14   52.49
   3  -1  -5    7.00    1.90
  -3   1   5    8.10    2.40
  -3   1   5    7.90    2.10
  -3   1   5    9.50    2.10
  -3   1   5    8.30    2.20
   2  -1  -5 1190.18   37.60
  -2   1   5 1167.08   37.70
  -2   1   5 1126.49   37.30
  -2   1   5 1154.28   37.80
  -2   1   5 1145.99   37.30
  -2   1   5 1073.49   37.00
   1  -1  -5   99.69    4.90
  -1   1   5  116.39    5.00
  -1   1   5  105.49    5.10
  -1   1   5  107.59    5.20
  -1   1   5   97.59    4.60
   0  -1  -5  205.88   10.20
   0  -1  -5  243.68   10.80
   0  -1  -5  228.18    8.40
   0  -1  -5  226.28    8.60
   0   1   5  214.38    8.40
   0   1   5  227.48    8.30
   0   1   5  206.78   10.40
   0   1   5  222.78    8.10
   0   1   5  198.68    8.50
   0   1   5  230.78   10.60
  -1  -1  -5  415.66   14.20
  -1  -1  -5  415.26   15.80
  -1  -1  -5  438.66   17.30
  -1  -1  -5  399.16   14.10
   1   1   5  411.66   14.30
   1   1   5  427.76   14.50
   1   1   5  374.66   16.70
  -2  -1  -5 1335.27   44.50
  -2  -1  -5 1409.76   44.20
  -2  -1  -5 1309.07   46.40
   2   1   5 1377.26   44.30
   2   1   5 1380.46   44.30
  -3  -1  -5   32.00    2.40
  -3  -1  -5   36.80    3.40
  -3  -1  -5   29.40    3.70
  -3  -1  -5   31.70    2.60
   3   1   5   29.90    2.40
   3   1   5   38.30    3.60
   3   1   5   37.30    3.50
  -4  -1  -5  121.69    7.10
  -4  -1  -5  112.59    7.60
  -4  -1  -5  126.09    5.50
  -4  -1  -5  124.29    5.70
   4   1   5  138.79    7.60
   4   1   5  121.59    5.50
   4   1   5  117.89    7.00
  -5  -1  -5  111.49    5.40
  -5  -1  -5  115.29    7.50
  -5  -1  -5  111.49    5.90
  -5  -1  -5  109.59    8.00
   5   1   5  102.89    7.60
   5   1   5  122.09    7.40
   5   1   5  107.59    5.40
  -6  -1  -5   42.00    3.80
  -6  -1  -5   38.50    3.80
  -6  -1  -5   42.70    4.20
  -6  -1  -5   48.60    3.90
  -6  -1  -5   44.10    3.80
  -6  -1  -5   40.20    3.80
  -7  -1  -5   22.20    2.50
  -7  -1  -5   18.60    2.30
  -7  -1  -5   20.40    2.40
  -7  -1  -5   23.50    2.60
  -7  -1  -5   23.50    2.50
  -6   1   4   49.70    5.90
  -6   1   4   56.19    3.60
  -6   1   4   61.49    3.80
   5  -1  -4   58.49    6.70
  -5   1   4   67.39    6.90
  -5   1   4   60.49    3.90
  -5   1   4   64.49    6.00
  -5   1   4   64.79    5.60
  -4   1   4    4.30    2.10
  -4   1   4    8.70    2.50
  -4   1   4    6.60    2.40
   3  -1  -4   54.39    3.70
  -3   1   4   50.49    3.90
  -3   1   4   50.69    3.80
  -3   1   4   43.70    3.60
  -3   1   4   54.39    3.70
  -3   1   4   45.10    3.90
   2  -1  -4  127.69    5.60
  -2   1   4  117.79    5.40
  -2   1   4  127.49    5.90
  -2   1   4  122.29    5.70
  -2   1   4  111.29    5.30
   1  -1  -4    0.40    1.30
   1  -1  -4    0.80    1.30
   1  -1  -4    1.90    1.00
  -1   1   4    1.20    1.20
  -1   1   4    2.00    1.50
  -1   1   4    0.20    1.30
  -1   1   4    0.50    0.90
   0  -1  -4   20.70    2.90
   0  -1  -4   20.40    2.10
   0  -1  -4   20.90    3.10
   0  -1  -4   21.70    2.00
   0   1   4   21.70    2.00
   0   1   4   18.00    2.90
   0   1   4   16.30    2.70
   0   1   4   18.60    1.90
  -1  -1  -4  199.78    7.50
  -1  -1  -4  199.58    9.40
  -1  -1  -4  197.98    8.80
  -1  -1  -4  194.08    9.40
  -1  -1  -4  199.28    7.50
   1   1   4  190.98    7.50
   1   1   4  203.78    7.60
   1   1   4  209.38    9.50
   1   1   4  196.58    9.30
  -2  -1  -4  372.16   13.40
  -2  -1  -4  365.36   13.70
   2   1   4  386.66   13.60
   2   1   4  381.56   13.60
  -3  -1  -4  869.31   29.40
  -3  -1  -4  873.01   30.10
   3   1   4  891.51   29.60
   3   1   4  845.52   29.50
  -4  -1  -4   13.50    1.90
  -4  -1  -4   12.10    2.60
  -4  -1  -4   15.40    1.90
  -4  -1  -4   18.30    3.50
   4   1   4   18.10    3.10
   4   1   4   12.40    2.70
   4   1   4   16.70    2.00
  -5  -1  -4   10.30    3.30
  -5  -1  -4   11.00    3.00
  -5  -1  -4   11.40    1.90
  -5  -1  -4   14.40    2.50
   5   1   4   12.50    2.00
   5   1   4   17.10    3.60
  -6  -1  -4   21.70    2.90
  -6  -1  -4   19.90    2.80
  -6  -1  -4   21.80    2.80
  -6  -1  -4   23.80    3.00
  -6  -1  -4   27.70    3.10
  -6  -1  -4   22.90    3.10
  -7  -1  -4   72.59    4.40
  -7  -1  -4   77.49    4.20
  -7  -1  -4   73.59    4.30
  -7  -1  -4   67.99    4.10
  -7  -1  -4   72.39    4.40
  -6   1   3    2.50    1.60
   5  -1  -3    4.10    2.80
  -5   1   3    1.00    1.40
  -5   1   3    6.00    2.60
  -5   1   3    4.40    2.50
  -5   1   3   -1.00    2.30
   4  -1  -3   71.69    5.20
  -4   1   3   71.99    5.10
  -4   1   3   74.19    5.30
  -4   1   3   79.29    5.30
  -4   1   3   73.39    5.10
   3  -1  -3   35.80    3.00
  -3   1   3   40.90    3.50
  -3   1   3   43.20    3.40
  -3   1   3   39.80    3.10
  -3   1   3   45.90    3.60
  -3   1   3   43.50    3.60
   2  -1  -3    0.80    1.00
  -2   1   3    3.40    1.20
  -2   1   3    3.10    1.30
  -2   1   3   -0.20    0.90
  -2   1   3   -0.20    1.00
  -2   1   3    1.50    1.00
   1  -1  -3   -0.50    1.00
   1  -1  -3    0.50    1.00
  -1   1   3    0.50    1.20
  -1   1   3   -1.20    1.10
   0  -1  -3  486.35   17.30
   0  -1  -3  487.85   16.10
   0  -1  -3  495.45   17.30
   0   1   3  465.15   16.00
   0   1   3  489.15   17.40
   0   1   3  487.55   17.30
  -1  -1  -3  782.32   26.40
  -1  -1  -3  770.22   26.30
  -1  -1  -3  802.02   26.10
   1   1   3  809.02   26.40
   1   1   3  692.03   24.50
   1   1   3  770.22   26.30
   1   1   3  711.43   25.70
  -2  -1  -3   70.99    3.70
  -2  -1  -3   67.99    5.00
  -2  -1  -3   70.19    4.10
  -2  -1  -3   65.99    3.70
   2   1   3   67.69    3.70
   2   1   3   69.09    3.90
  -3  -1  -3    4.10    1.60
  -3  -1  -3    3.30    1.70
  -3  -1  -3    3.70    1.50
   3   1   3    5.30    1.60
   3   1   3    5.50    1.80
  -4  -1  -3   29.10    2.40
  -4  -1  -3   35.90    4.40
  -4  -1  -3   38.40    3.70
  -4  -1  -3   30.80    3.70
  -4  -1  -3   28.10    2.60
   4   1   3   27.00    3.60
   4   1   3   34.80    3.90
  -5  -1  -3  409.66   17.30
  -5  -1  -3  379.16   16.00
  -5  -1  -3  407.16   14.30
   5   1   3  377.06   16.20
   5   1   3  367.66   15.90
  -6  -1  -3  115.99    6.40
  -6  -1  -3  118.69    6.10
  -6  -1  -3  128.49    6.20
  -6  -1  -3  120.19    6.20
  -6  -1  -3  108.39    6.00
  -6  -1  -3  121.09    6.10
  -7  -1  -3   65.69    4.30
  -7  -1  -3   67.19    3.90
  -7  -1  -3   52.99    4.00
  -7  -1  -3   65.79    4.20
  -7  -1  -3   69.59    4.20
  -6   1   2  431.46   15.40
  -5   1   2    8.60    3.00
  -5   1   2   10.60    2.90
  -5   1   2   11.60    3.00
  -5   1   2    8.00    2.00
  -5   1   2    8.60    2.70
   4  -1  -2  326.17   12.80
  -4   1   2  303.57   12.60
  -4   1   2  284.47   12.50
  -4   1   2  309.17   12.70
  -4   1   2  299.37   12.50
  -4   1   2  313.77   12.40
   3  -1  -2  382.96   16.00
  -3   1   2  386.96   14.40
  -3   1   2  400.96   14.50
  -3   1   2  400.86   14.50
  -3   1   2  388.96   14.50
  -3   1   2  409.96   14.40
   2  -1  -2   96.19    4.50
   2  -1  -2   97.79    4.60
  -2   1   2   99.79    4.60
  -2   1   2   97.19    4.40
  -2   1   2   93.79    4.50
  -2   1   2   85.89    4.30
   1  -1  -2 4011.30  127.19
   1  -1  -2 4162.18  127.29
  -1   1   2 4105.09  127.29
  -1   1   2 4036.10  127.39
   0  -1  -2 2626.74   81.69
   0  -1  -2 2640.34   82.59
   0  -1  -2 2632.14   82.59
   0   1   2 2485.45   81.69
   0   1   2 2659.63   82.59
   0   1   2 2701.53   82.69
  -1  -1  -2 1609.24   51.99
  -1  -1  -2 1599.24   51.99
  -1  -1  -2 1722.23   52.09
   1   1   2 1702.83   51.99
   1   1   2 1557.34   51.79
   1   1   2 1534.35   51.89
  -2  -1  -2  706.23   25.80
  -2  -1  -2  753.72   24.80
  -2  -1  -2  823.52   25.40
  -2  -1  -2  766.12   26.70
  -2  -1  -2  762.42   24.80
   2   1   2  769.62   25.40
   2   1   2  771.02   27.10
   2   1   2  763.12   24.80
   2   1   2  704.03   25.20
  -3  -1  -2  258.27    9.90
  -3  -1  -2  245.98   10.40
  -3  -1  -2  236.08    9.80
   3   1   2  261.37   10.00
  -4  -1  -2   18.10    2.80
  -4  -1  -2   20.90    2.20
  -4  -1  -2   21.30    3.50
  -4  -1  -2   15.10    2.70
  -4  -1  -2   26.00    3.40
   4   1   2   22.20    3.10
  -5  -1  -2   41.00    3.30
  -5  -1  -2   28.00    4.00
  -5  -1  -2   35.00    4.40
  -5  -1  -2   31.20    4.50
   5   1   2   35.90    4.70
   5   1   2   48.90    5.20
  -6  -1  -2   44.00    3.90
  -6  -1  -2   44.60    4.10
  -6  -1  -2   52.29    4.30
  -6  -1  -2   52.49    4.00
  -6  -1  -2   45.90    4.00
  -7  -1  -2   74.09    4.60
  -7  -1  -2   84.99    4.40
  -7  -1  -2   71.49    4.50
  -7  -1  -2   88.09    4.70
  -7  -1  -2   76.89    4.60
  -8  -1  -2    8.30    1.40
  -8  -1  -2    6.90    1.30
  -7   1   1   -0.50    1.40
  -7   1   1    2.00    1.60
  -6   1   1   18.60    2.50
  -6   1   1   18.80    2.60
  -6   1   1   22.90    2.70
  -5   1   1   23.00    3.80
  -5   1   1   24.50    3.90
  -5   1   1   25.70    3.80
  -5   1   1   19.70    3.70
  -5   1   1   21.50    2.60
   4  -1  -1  248.48   10.30
  -4   1   1  244.08   10.30
  -4   1   1  226.68   10.50
  -4   1   1  227.88    9.90
  -4   1   1  215.18   10.10
  -4   1   1  223.28   10.00
   3  -1  -1   73.99    5.10
   3  -1  -1   78.39    4.50
  -3   1   1   78.99    4.50
  -3   1   1   76.59    4.40
  -3   1   1   75.09    4.60
  -3   1   1   77.09    4.30
  -3   1   1   75.09    4.40
  -3   1   1   69.79    5.00
   2  -1  -1   11.30    1.80
  -2   1   1    8.10    1.40
  -2   1   1   10.90    1.60
  -2   1   1   11.50    2.00
  -2   1   1   13.80    1.80
   1  -1  -1  381.76   12.20
  -1   1   1  373.26   12.10
  -1   1   1  338.37   12.20
   0  -1  -1  276.87    9.50
   0  -1  -1  290.07    9.60
   0  -1  -1  277.07    9.10
   0  -1  -1  291.17    9.10
   0   1   1  288.87    9.60
   0   1   1  267.57    9.10
   0   1   1  268.57    9.10
   0   1   1  278.87    9.50
  -1  -1  -1  271.27    9.90
  -1  -1  -1  269.27    9.50
   1   1   1  274.47   10.10
   1   1   1  263.07    9.30
   1   1   1  263.97    9.30
  -2  -1  -1  389.66   14.10
  -2  -1  -1  416.96   14.20
  -2  -1  -1  426.06   14.60
  -2  -1  -1  410.86   15.60
   2   1   1  439.86   16.10
  -3  -1  -1   40.80    3.10
  -3  -1  -1   33.90    3.30
  -3  -1  -1   37.90    3.10
   3   1   1   49.10    3.40
  -4  -1  -1  157.98    8.20
  -4  -1  -1  157.78    6.40
  -4  -1  -1  160.78    7.70
  -4  -1  -1  163.88    7.80
   4   1   1  161.18    7.80
  -5  -1  -1    8.30    2.60
  -5  -1  -1   11.10    2.90
  -5  -1  -1   10.50    3.10
  -5  -1  -1    6.60    1.80
   5   1   1   11.40    2.80
  -6  -1  -1  763.92   25.50
  -6  -1  -1  745.93   25.30
  -6  -1  -1  742.83   25.60
  -6  -1  -1  751.12   25.30
  -6  -1  -1  732.53   25.30
  -7  -1  -1    1.90    1.50
  -7  -1  -1    2.70    1.70
  -7  -1  -1    1.70    1.70
  -7  -1  -1    4.80    1.70
  -8   1   0    6.80    1.40
  -7   1   0   74.79    4.50
  -7   1   0   71.79    4.30
  -7   1   0   67.99    4.20
  -7   1   0   62.49    4.20
  -6   1   0   10.60    2.60
  -6   1   0   10.00    2.20
  -6   1   0   10.10    2.20
  -6   1   0   15.20    2.40
   5  -1   0   72.79    5.70
  -5   1   0   67.19    5.70
  -5   1   0   64.39    4.00
  -5   1   0   79.49    6.40
  -5   1   0   70.59    5.80
  -5   1   0   75.19    5.90
  -4   1   0    9.40    1.70
  -4   1   0    6.90    2.10
  -4   1   0    9.20    2.50
  -4   1   0    7.00    2.00
  -4   1   0    7.60    2.30
   3  -1   0  423.46   15.20
  -3   1   0  437.46   15.50
  -3   1   0  410.66   16.60
  -3   1   0  444.46   15.40
  -3   1   0  438.06   15.80
  -3   1   0  405.46   15.00
   2  -1   0  355.46   13.90
  -2   1   0  384.26   13.00
  -2   1   0  391.86   14.00
  -2   1   0  381.76   13.10
  -2   1   0  363.46   13.20
   1  -1   0 8165.68  255.07
   1  -1   0 8357.56  254.37
   1  -1   0 8035.30  253.97
  -1   1   0 8380.06  256.57
  -1   1   0 7923.11  254.37
   0  -1   0   -7.30    0.50
   0  -1   0   -7.80    0.40
   0   1   0   -7.60    0.40
   0   1   0   -7.40    0.40
   0   1   0   -7.60    0.40
  -1  -1   0 8317.77  256.27
   1   1   0 8163.28  256.57
   1   1   0 8105.09  257.07
  -2  -1   0  333.67   12.10
  -2  -1   0  344.17   12.40
  -2  -1   0  376.46   13.30
  -2  -1   0  329.17   12.50
   2   1   0  321.77   13.10
   2   1   0  404.76   13.70
  -3  -1   0  438.86   15.10
  -3  -1   0  412.26   15.50
  -3  -1   0  393.96   14.90
  -3  -1   0  420.86   15.10
   3   1   0  454.55   15.00
  -4  -1   0   10.40    2.20
  -4  -1   0   10.50    2.50
  -4  -1   0    8.90    2.10
  -4  -1   0   13.60    3.70
  -5  -1   0   75.09    5.70
  -5  -1   0   72.49    5.90
  -5  -1   0   63.59    3.90
  -5  -1   0   69.29    5.50
   5   1   0   67.89    5.40
  -6  -1   0    9.00    2.20
  -6  -1   0   13.50    2.40
  -6  -1   0   12.20    2.60
  -7  -1   0   69.09    4.20
  -8   1  -1    4.70    1.20
  -8   1  -1    4.20    1.30
  -8   1  -1    5.20    1.40
  -7   1  -1    1.10    1.60
  -7   1  -1    1.80    1.50
  -7   1  -1    1.60    1.80
  -7   1  -1    3.20    1.60
  -6   1  -1  781.12   26.60
  -6   1  -1  786.22   26.50
  -6   1  -1  795.02   26.30
  -6   1  -1  755.42   26.30
  -6   1  -1  778.22   26.30
   5  -1   1    3.60    2.10
  -5   1  -1   13.00    3.30
  -5   1  -1   11.00    3.00
  -5   1  -1    7.90    3.00
  -5   1  -1    6.30    1.90
  -5   1  -1    6.80    2.60
   4  -1   1  172.58    8.20
  -4   1  -1  154.78    8.40
  -4   1  -1  158.88    8.10
  -4   1  -1  153.48    7.90
  -4   1  -1  160.88    6.50
  -4   1  -1  161.58    7.80
   3  -1   1   39.40    2.90
  -3   1  -1   39.70    3.20
  -3   1  -1   34.20    2.80
  -3   1  -1   35.40    3.40
  -3   1  -1   41.70    3.30
  -3   1  -1   37.00    3.20
  -2   1  -1  368.86   14.20
  -2   1  -1  410.46   14.00
  -2   1  -1  410.66   15.10
  -2   1  -1  396.76   13.70
  -2   1  -1  400.16   13.70
   1  -1   1  252.87    9.40
   1  -1   1  265.27    9.40
   1  -1   1  268.97    9.70
  -1   1  -1  246.28    9.40
  -1   1  -1  257.67    9.40
  -1   1  -1  268.67    9.70
   0  -1   1  292.27    9.80
   0  -1   1  288.77    9.80
   0  -1   1  281.27    9.50
   0   1  -1  287.17    9.50
   0   1  -1  289.97    9.80
   0   1  -1  286.97    9.70
  -1  -1   1  364.06   12.20
   1   1  -1  354.66   12.10
   1   1  -1  352.26   12.10
  -2  -1   1   10.30    1.90
   2   1  -1   10.90    1.90
   2   1  -1   12.10    1.90
  -3  -1   1   73.19    4.30
  -3  -1   1   77.49    4.30
  -3  -1   1   69.39    4.10
  -3  -1   1   77.89    4.20
  -3  -1   1   73.89    5.10
   3   1  -1   69.19    5.00
  -4  -1   1  225.88    9.60
  -4  -1   1  225.08   10.00
  -4  -1   1  213.18    9.60
  -4  -1   1  233.18    9.80
  -5  -1   1   19.60    3.40
  -5  -1   1   20.30    3.50
  -5  -1   1   21.90    2.50
  -5  -1   1   30.70    6.90
   5   1  -1   24.70    3.90
  -8   1  -2   11.10    1.50
  -8   1  -2   11.00    1.40
  -8   1  -2   10.30    1.50
  -7   1  -2   73.69    4.30
  -7   1  -2   78.89    4.50
  -7   1  -2   72.59    4.40
  -7   1  -2   74.79    4.60
  -7   1  -2   76.49    4.60
  -6   1  -2   52.39    4.10
  -6   1  -2   44.50    4.10
  -6   1  -2   42.40    3.90
  -6   1  -2   45.60    3.90
  -6   1  -2   46.50    4.30
   5  -1   2   31.40    4.50
  -5   1  -2   41.50    4.90
  -5   1  -2   35.70    4.80
  -5   1  -2   38.60    5.30
  -5   1  -2   43.50    3.50
   4  -1   2   25.10    3.50
  -4   1  -2   21.90    2.20
  -4   1  -2   20.60    3.20
  -4   1  -2   18.00    3.20
  -4   1  -2   24.80    3.50
  -4   1  -2   28.70    4.10
   3  -1   2  259.57   10.10
  -3   1  -2  232.88   10.30
  -3   1  -2  257.07   10.00
  -3   1  -2  238.18   10.10
  -3   1  -2  255.77   10.00
   2  -1   2  775.22   26.60
   2  -1   2  706.43   26.40
   2  -1   2  844.82   25.90
  -2   1  -2  788.32   27.50
  -2   1  -2  775.52   25.60
  -2   1  -2  784.12   25.70
  -2   1  -2  804.42   26.10
   1  -1   2 1619.74   52.09
   1  -1   2 1652.73   52.19
   1  -1   2 1584.04   52.09
  -1   1  -2 1610.04   52.19
  -1   1  -2 1625.34   52.29
  -1   1  -2 1646.94   52.19
   0  -1   2 2579.24   82.89
   0  -1   2 2647.83   83.49
   0  -1   2 2635.84   83.49
   0   1  -2 2719.03   83.49
   0   1  -2 2658.43   83.49
   0   1  -2 2685.83   82.89
  -1  -1   2 4027.90  124.59
  -1  -1   2 4139.99  124.79
   1   1  -2 3840.92  124.39
  -2  -1   2   88.39    4.30
  -2  -1   2   92.19    4.20
  -2  -1   2   89.89    4.40
   2   1  -2   95.99    4.70
   2   1  -2  101.69    4.80
  -3  -1   2  364.46   13.80
  -3  -1   2  391.96   14.00
  -3  -1   2  403.76   14.20
  -3  -1   2  387.16   13.70
  -3  -1   2  376.06   13.50
  -4  -1   2  303.77   12.30
  -4  -1   2  294.87   12.10
  -4  -1   2  297.97   12.20
  -4  -1   2  303.97   12.00
  -5  -1   2   11.00    3.00
  -8   1  -3   15.60    1.80
  -8   1  -3   24.30    2.00
  -7   1  -3   65.79    4.10
  -7   1  -3   62.09    4.10
  -7   1  -3   61.89    4.10
  -7   1  -3   72.99    4.30
  -7   1  -3   69.89    4.40
  -6   1  -3  113.19    6.10
  -6   1  -3  128.69    6.30
  -6   1  -3  122.49    6.30
  -6   1  -3  121.99    6.20
  -6   1  -3  121.79    6.60
  -6   1  -3  131.09    6.30
   5  -1   3  398.16   16.40
   5  -1   3  411.76   16.70
  -5   1  -3  374.56   17.10
  -5   1  -3  397.76   14.30
  -5   1  -3  385.86   16.20
  -5   1  -3  381.66   16.20
   4  -1   3   39.10    4.40
  -4   1  -3   36.30    4.40
  -4   1  -3   32.20    2.80
  -4   1  -3   36.90    4.20
  -4   1  -3   33.10    4.40
  -4   1  -3   27.50    3.60
   3  -1   3    3.10    1.60
  -3   1  -3    4.20    1.80
  -3   1  -3    3.60    1.60
  -3   1  -3    2.30    1.50
  -3   1  -3    3.70    1.80
   2  -1   3   68.79    3.80
  -2   1  -3   65.19    4.00
  -2   1  -3   67.59    5.00
  -2   1  -3   76.49    3.80
  -2   1  -3   66.29    3.70
   1  -1   3  673.83   24.50
   1  -1   3  794.42   26.40
   1  -1   3  785.82   26.30
   1  -1   3  703.53   25.70
  -1   1  -3  774.22   26.40
  -1   1  -3  815.22   26.10
  -1   1  -3  774.02   26.30
   0  -1   3  514.15   17.90
   0  -1   3  502.05   17.80
   0  -1   3  479.85   16.80
   0   1  -3  496.85   16.80
   0   1  -3  512.95   17.80
   0   1  -3  497.55   17.80
  -1  -1   3    1.10    0.80
  -1  -1   3    0.30    1.10
  -1  -1   3   -0.60    1.00
   1   1  -3    0.10    0.70
   1   1  -3    0.80    1.00
   1   1  -3    0.40    0.90
  -2  -1   3    0.90    1.00
  -2  -1   3   -0.10    1.10
  -2  -1   3    0.60    1.10
   2   1  -3    1.50    0.90
   2   1  -3    0.10    0.90
  -3  -1   3   40.70    3.30
  -3  -1   3   39.40    3.30
  -3  -1   3   34.90    3.00
  -3  -1   3   41.30    3.50
  -3  -1   3   35.80    3.10
  -4  -1   3   71.39    5.10
  -4  -1   3   72.79    5.00
  -4  -1   3   73.09    5.10
  -5  -1   3    1.70    2.20
  -7   1  -4   72.19    4.20
  -7   1  -4   67.19    4.20
  -7   1  -4   73.59    4.40
  -7   1  -4   77.09    4.20
  -7   1  -4   69.49    4.10
  -6   1  -4   23.70    2.90
  -6   1  -4   22.70    2.90
  -6   1  -4   20.40    2.80
  -6   1  -4   21.90    2.90
  -6   1  -4   22.30    2.80
  -6   1  -4   24.80    3.20
   5  -1   4   10.50    3.30
   5  -1   4   14.30    3.40
  -5   1  -4    8.70    3.20
  -5   1  -4   14.80    2.40
  -5   1  -4    8.00    2.80
   4  -1   4   11.30    2.70
   4  -1   4   15.30    2.00
   4  -1   4   12.80    2.70
  -4   1  -4   11.60    1.70
  -4   1  -4   15.80    3.20
  -4   1  -4   18.30    2.30
  -4   1  -4   21.80    3.80
  -4   1  -4   14.70    2.90
   3  -1   4  906.61   29.50
  -3   1  -4  843.52   29.50
  -3   1  -4  872.21   30.00
  -3   1  -4  868.71   29.20
  -3   1  -4  821.52   29.20
   2  -1   4  371.46   13.40
   2  -1   4  379.76   13.50
  -2   1  -4  366.26   13.70
  -2   1  -4  371.96   13.30
   1  -1   4  197.38    7.50
   1  -1   4  188.48    9.30
   1  -1   4  177.58    7.30
   1  -1   4  210.98    9.70
  -1   1  -4  200.28    9.50
  -1   1  -4  207.68    9.60
  -1   1  -4  219.38    9.10
  -1   1  -4  200.78    7.40
   0  -1   4   22.90    2.20
   0  -1   4   18.40    2.90
   0  -1   4   20.10    2.00
   0  -1   4   24.40    3.10
   0   1  -4   16.80    2.70
   0   1  -4   20.90    2.20
   0   1  -4   24.60    3.10
  -1  -1   4    0.80    0.80
  -1  -1   4    0.00    0.90
  -1  -1   4    0.30    1.40
  -1  -1   4    3.00    1.00
  -1  -1   4    0.10    1.00
  -1  -1   4    0.30    1.30
   1   1  -4    1.30    1.20
   1   1  -4    1.80    0.80
   1   1  -4    1.00    1.00
   1   1  -4   -0.40    1.00
  -2  -1   4  116.69    5.30
  -2  -1   4  112.79    5.20
  -2  -1   4  107.89    5.50
   2   1  -4  119.79    5.50
  -3  -1   4   49.50    3.70
  -3  -1   4   47.40    3.90
  -3  -1   4   43.90    3.70
  -3  -1   4   51.89    3.70
   3   1  -4   55.29    3.90
  -4  -1   4    8.30    2.40
  -4  -1   4    8.80    2.20
  -4  -1   4    5.50    2.10
  -4  -1   4    6.30    1.60
  -4  -1   4    5.50    2.30
   4   1  -4    4.10    2.00
  -5  -1   4   69.39    6.00
  -5  -1   4   62.49    5.50
   5   1  -4   49.40    5.70
  -7   1  -5   30.20    2.80
  -7   1  -5   23.40    2.60
  -7   1  -5   24.10    2.50
  -7   1  -5   21.90    2.40
  -7   1  -5   22.40    2.50
  -6   1  -5   53.39    3.90
  -6   1  -5   40.80    3.60
  -6   1  -5   38.80    3.80
  -6   1  -5   42.80    3.70
  -6   1  -5   40.10    4.00
  -6   1  -5   40.60    3.80
   5  -1   5  115.69    7.50
   5  -1   5  109.09    7.80
  -5   1  -5  122.99    8.30
  -5   1  -5  111.79    5.80
  -5   1  -5  109.39    7.40
   4  -1   5  121.99    5.40
   4  -1   5  123.19    7.40
   4  -1   5  124.59    7.40
  -4   1  -5  116.19    8.30
  -4   1  -5  112.29    7.50
  -4   1  -5  120.59    5.60
  -4   1  -5  117.09    5.30
  -4   1  -5  134.99    7.30
   3  -1   5   36.30    3.90
   3  -1   5   31.70    2.40
   3  -1   5   33.50    3.70
  -3   1  -5   28.40    2.30
  -3   1  -5   31.10    3.90
  -3   1  -5   31.70    3.40
  -3   1  -5   33.80    3.90
   2  -1   5 1328.37   44.10
   2  -1   5 1360.26   44.00
  -2   1  -5 1362.46   44.40
  -2   1  -5 1358.56   43.90
  -2   1  -5 1384.16   44.50
   1  -1   5  426.36   14.40
   1  -1   5  418.26   14.20
   1  -1   5  425.56   14.70
   1  -1   5  393.76   17.10
  -1   1  -5  411.66   16.20
  -1   1  -5  437.26   14.50
  -1   1  -5  421.26   14.30
  -1   1  -5  410.16   17.30
   0  -1   5  237.58   10.90
   0  -1   5  211.98   10.60
   0  -1   5  230.38    8.50
   0  -1   5  215.88    9.00
   0  -1   5  235.48    8.50
   0  -1   5  237.38    8.40
   0   1  -5  222.98    8.40
   0   1  -5  207.18   10.30
   0   1  -5  229.58    9.10
  -1  -1   5  104.39    5.20
  -1  -1   5  109.69    5.10
  -1  -1   5  112.59    5.10
   1   1  -5  112.79    5.20
  -2  -1   5 1106.89   37.80
  -2  -1   5 1158.38   38.00
  -2  -1   5 1187.58   38.40
  -2  -1   5 1166.68   37.90
   2   1  -5 1178.38   38.10
  -3  -1   5    6.90    2.30
  -3  -1   5   11.80    2.50
  -3  -1   5    8.30    2.00
  -3  -1   5    6.50    1.90
   3   1  -5    9.20    2.20
  -4  -1   5 1631.74   52.79
  -4  -1   5 1547.95   52.09
  -4  -1   5 1562.84   51.79
  -4  -1   5 1558.84   51.59
  -4  -1   5 1592.74   50.29
   4   1  -5 1511.55   51.69
  -5  -1   5   33.00    4.60
  -5  -1   5   30.70    4.80
  -5  -1   5   35.90    2.90
  -7   1  -6   19.60    2.30
  -7   1  -6   19.60    2.10
  -7   1  -6   22.20    2.30
  -7   1  -6   16.00    2.10
  -7   1  -6   24.20    2.40
  -6   1  -6    0.80    1.70
  -6   1  -6    5.20    1.80
  -6   1  -6    5.70    2.00
  -6   1  -6    3.30    1.90
  -6   1  -6    2.00    1.70
  -6   1  -6    5.60    1.80
   5  -1   6    2.80    1.60
  -5   1  -6    4.20    1.90
  -5   1  -6    4.80    2.00
  -5   1  -6    2.40    1.80
  -5   1  -6    4.30    2.00
  -5   1  -6    2.30    2.00
  -5   1  -6    4.10    1.80
  -5   1  -6    4.60    1.90
   4  -1   6   -0.50    2.30
   4  -1   6    0.70    1.90
   4  -1   6   -1.20    1.20
  -4   1  -6   -0.60    2.20
  -4   1  -6    0.30    1.20
  -4   1  -6    3.70    2.30
  -4   1  -6   -0.80    1.20
   3  -1   6   -0.70    1.70
   3  -1   6    1.10    1.70
   3  -1   6   -0.50    1.00
  -3   1  -6    2.60    2.00
  -3   1  -6    0.20    1.60
  -3   1  -6    0.20    1.60
  -3   1  -6    2.00    1.00
  -3   1  -6    4.30    1.30
   2  -1   6    5.10    1.80
  -2   1  -6    6.40    1.90
  -2   1  -6    6.40    2.00
  -2   1  -6    6.70    1.80
   1  -1   6  983.60   33.00
   1  -1   6 1037.70   33.40
  -1   1  -6 1020.90   33.50
   0  -1   6    2.10    1.40
   0  -1   6    1.90    1.20
   0   1  -6    2.30    1.20
   0   1  -6    1.00    1.20
  -1  -1   6   -0.90    1.20
  -1  -1   6    1.40    1.30
  -1  -1   6   -1.60    1.10
  -1  -1   6    1.10    1.20
   1   1  -6    2.70    1.30
   1   1  -6    2.00    1.30
  -2  -1   6  137.79    6.80
  -2  -1   6  107.29    6.00
  -2  -1   6  128.99    6.20
  -2  -1   6  131.39    6.50
   2   1  -6  141.59    6.60
   2   1  -6  127.49    6.30
  -3  -1   6   15.40    2.20
  -3  -1   6   13.60    2.40
  -3  -1   6   18.00    3.10
  -3  -1   6   13.80    3.10
  -3  -1   6   11.30    2.40
   3   1  -6   11.50    2.50
  -4  -1   6    1.90    2.10
  -4  -1   6    6.00    2.40
  -4  -1   6    5.40    1.70
  -4  -1   6    5.40    2.90
   4   1  -6    5.50    2.10
  -5  -1   6   -1.00    2.60
  -5  -1   6    2.90    1.50
  -5  -1   6    0.40    2.50
  -5  -1   6    0.60    1.60
  -6  -1   6    4.30    2.00
   7  -1   7    2.20    1.30
  -7   1  -7    2.00    1.20
  -7   1  -7   -1.40    1.20
  -7   1  -7    1.20    1.20
  -7   1  -7   -0.80    1.00
  -7   1  -7   -1.00    1.20
   6  -1   7   17.70    2.20
  -6   1  -7   25.00    2.90
  -6   1  -7   19.10    2.40
  -6   1  -7   19.10    2.50
  -6   1  -7   18.50    2.50
  -6   1  -7   20.80    2.70
  -6   1  -7   23.20    2.70
  -6   1  -7   17.80    2.40
   5  -1   7    2.90    1.60
  -5   1  -7    4.70    1.90
  -5   1  -7    0.70    1.50
  -5   1  -7    3.00    1.70
  -5   1  -7    2.30    1.70
  -5   1  -7    0.00    1.50
  -5   1  -7    2.80    1.80
  -5   1  -7    3.90    2.00
   4  -1   7  143.99    8.30
   4  -1   7  141.79    8.30
   4  -1   7  138.79    6.30
  -4   1  -7  137.29    8.10
  -4   1  -7  139.19    8.60
  -4   1  -7  130.39    6.20
   3  -1   7   72.49    5.30
   3  -1   7   64.79    3.80
   3  -1   7   66.59    5.20
  -3   1  -7   65.19    3.70
  -3   1  -7   66.79    5.30
  -3   1  -7   53.89    4.60
  -3   1  -7   58.99    4.90
  -3   1  -7   59.79    5.60
   2  -1   7  487.65   17.90
   2  -1   7  482.75   17.50
   2  -1   7  470.45   16.30
  -2   1  -7  489.85   16.30
  -2   1  -7  492.65   18.30
   1  -1   7  142.49    6.90
  -1   1  -7  143.79    7.00
   0  -1   7   48.70    3.50
   0  -1   7   44.00    3.40
   0   1  -7   39.40    3.20
   0   1  -7   46.20    3.50
  -1  -1   7   32.60    3.20
  -1  -1   7   32.90    3.10
  -1  -1   7   33.80    3.30
  -1  -1   7   36.20    3.30
   1   1  -7   30.00    3.00
   1   1  -7   28.10    3.10
  -2  -1   7  749.82   25.80
  -2  -1   7  736.93   25.70
  -2  -1   7  765.22   26.10
  -2  -1   7  727.43   26.30
   2   1  -7  765.82   25.70
   2   1  -7  708.33   25.80
  -3  -1   7   88.29    5.80
  -3  -1   7   87.09    4.70
  -3  -1   7   85.39    5.70
  -3  -1   7   93.59    6.40
  -3  -1   7   91.49    6.00
   3   1  -7   91.09    5.90
   3   1  -7   79.19    5.60
  -4  -1   7   15.20    3.30
  -4  -1   7   14.30    2.00
  -4  -1   7   17.10    2.50
  -4  -1   7   12.90    3.10
  -4  -1   7   13.10    3.80
   4   1  -7   16.50    3.40
   4   1  -7   11.20    3.00
  -5  -1   7   45.10    5.40
  -5  -1   7   58.79    4.30
  -5  -1   7   56.09    6.60
  -5  -1   7   60.29    6.50
  -5  -1   7   47.50    3.60
   5   1  -7   55.09    5.90
  -6  -1   7   79.19    4.50
  -6  -1   7   80.99    4.90
  -6  -1   7   86.79    4.90
  -6  -1   7   81.99    4.40
   7  -1   8    2.40    1.20
  -7   1  -8    3.70    1.20
  -7   1  -8    3.10    1.30
  -7   1  -8    4.00    1.10
   6  -1   8    4.90    1.70
  -6   1  -8    1.70    1.40
  -6   1  -8    4.00    1.60
  -6   1  -8    3.80    1.60
  -6   1  -8    4.20    1.50
  -6   1  -8    4.60    1.60
  -6   1  -8    5.80    1.70
   5  -1   8   20.90    2.60
  -5   1  -8   23.90    3.00
  -5   1  -8   18.60    2.50
  -5   1  -8   21.70    2.70
  -5   1  -8   20.10    2.70
  -5   1  -8   20.50    2.80
  -5   1  -8   23.00    2.70
  -5   1  -8   22.80    2.70
   4  -1   8   75.79    4.60
   4  -1   8   74.59    6.30
   4  -1   8   77.39    6.40
  -4   1  -8   82.79    5.00
   3  -1   8   92.19    6.30
   3  -1   8   97.39    6.50
   3  -1   8   89.29    4.70
  -3   1  -8   76.89    6.60
   2  -1   8   35.10    4.10
   2  -1   8   36.60    2.70
  -2   1  -8   30.70    4.10
   1  -1   8  319.77   12.70
   1  -1   8  301.67   10.90
  -1   1  -8  316.07   12.60
   0  -1   8  244.88   10.40
   0   1  -8  234.68   10.00
   0   1  -8  264.87   10.40
  -1  -1   8    3.90    2.00
  -1  -1   8    0.40    1.60
   1   1  -8    6.20    1.90
   1   1  -8    3.90    1.60
  -2  -1   8  100.59    6.10
  -2  -1   8  110.09    6.20
  -2  -1   8   95.79    6.40
  -2  -1   8  109.89    5.20
  -2  -1   8   90.29    6.40
   2   1  -8  110.09    6.40
   2   1  -8  108.29    6.10
  -3  -1   8   31.50    4.10
  -3  -1   8   23.80    2.70
  -3  -1   8   24.30    4.20
  -3  -1   8   23.10    4.20
  -3  -1   8   24.70    3.60
   3   1  -8   30.90    3.80
   3   1  -8   30.80    4.10
  -4  -1   8  147.49    6.90
  -4  -1   8  135.89    8.30
  -4  -1   8  144.19    6.40
  -4  -1   8  131.99    8.90
   4   1  -8  143.59    8.30
   4   1  -8  127.99    8.20
  -5  -1   8  160.38    7.50
  -5  -1   8  162.48    7.50
  -5  -1   8  158.68    7.00
  -5  -1   8  156.68    9.30
  -5  -1   8  167.98    7.60
  -5  -1   8  153.98    6.80
  -5  -1   8  150.78    7.50
   5   1  -8  162.08    9.20
  -6  -1   8   19.80    2.70
  -6  -1   8   23.20    2.80
  -6  -1   8   22.60    2.20
  -6  -1   8   21.30    2.40
  -6  -1   8   19.10    2.60
  -7  -1   8    8.20    1.70
   6  -1   9   37.20    3.00
  -6   1  -9   34.10    2.80
  -6   1  -9   34.30    2.90
  -6   1  -9   31.70    2.80
  -6   1  -9   28.60    2.80
  -6   1  -9   34.30    2.90
  -6   1  -9   32.60    2.80
   5  -1   9    3.50    1.60
   5  -1   9    3.50    1.70
  -5   1  -9    4.30    1.70
  -5   1  -9    1.10    1.60
  -5   1  -9   -0.10    1.50
  -5   1  -9    0.20    1.70
  -5   1  -9   -2.00    1.40
   4  -1   9   -0.10    1.60
   4  -1   9    0.40    1.50
  -4   1  -9    3.20    1.70
  -4   1  -9    1.40    1.60
  -4   1  -9   -1.00    1.60
   3  -1   9   49.00    3.70
   3  -1   9   48.50    5.80
   2  -1   9    7.40    2.60
   2  -1   9    2.80    1.40
  -2   1  -9    3.10    2.30
   1  -1   9   13.50    1.90
   1  -1   9    9.00    2.70
  -1   1  -9   15.00    2.90
   0  -1   9  251.47    9.60
   0  -1   9  284.67   11.60
   0   1  -9  276.87   11.40
  -1  -1   9  568.24   21.70
  -1  -1   9  606.74   21.90
   1   1  -9  586.04   21.60
   1   1  -9  603.84   21.50
  -2  -1   9  180.48    9.70
  -2  -1   9  203.28    8.20
  -2  -1   9  195.38    9.40
  -2  -1   9  192.38    9.90
   2   1  -9  195.98    9.60
   2   1  -9  199.38    9.40
  -3  -1   9   15.00    3.70
  -3  -1   9   18.20    2.30
  -3  -1   9   24.70    3.00
   3   1  -9   20.90    3.60
   3   1  -9   23.30    3.80
  -4  -1   9    0.10    2.80
  -4  -1   9   -1.10    1.60
  -4  -1   9   -0.10    2.60
  -4  -1   9   -0.90    1.30
   4   1  -9    1.30    2.30
   4   1  -9    1.90    2.50
  -5  -1   9  125.79    6.40
  -5  -1   9  121.19    6.80
  -5  -1   9  124.19    5.60
  -5  -1   9  117.79    6.40
  -5  -1   9  130.99    8.30
  -5  -1   9  127.19    6.50
  -5  -1   9  124.59    5.90
  -5  -1   9  129.59    6.40
   5   1  -9  131.69    8.20
  -6  -1   9   13.60    1.80
  -6  -1   9   13.20    2.00
  -6  -1   9   14.30    2.30
  -6  -1   9    8.70    2.00
  -6  -1   9   17.10    2.40
  -6  -1   9   12.70    2.40
  -7  -1   9   12.50    1.60
  -7  -1   9   11.00    1.50
   6  -1  10    3.20    1.40
   6  -1  10    3.40    1.30
  -6   1 -10    2.80    1.30
  -6   1 -10    1.00    1.10
  -6   1 -10    3.10    1.30
  -6   1 -10    3.20    1.20
  -6   1 -10    3.60    1.30
   5  -1  10   54.89    3.80
   5  -1  10   49.10    3.60
  -5   1 -10   42.90    3.50
  -5   1 -10   49.00    3.50
  -5   1 -10   46.30    3.60
   4  -1  10   34.30    3.20
   4  -1  10   33.20    3.30
  -4   1 -10   34.60    3.30
  -4   1 -10   35.10    3.30
  -4   1 -10   26.60    3.10
   3  -1  10  603.34   20.20
   3  -1  10  596.04   20.30
   3  -1  10  573.04   20.00
  -3   1 -10  570.44   20.30
  -3   1 -10  595.74   20.40
  -3   1 -10  585.24   20.00
   2  -1  10  108.19    7.40
   2  -1  10  107.99    5.30
  -2   1 -10  107.59    5.50
  -2   1 -10  101.29    7.50
   1  -1  10    4.00    1.40
   1  -1  10    4.70    2.50
  -1   1 -10    6.60    2.50
  -1   1 -10    2.50    1.40
   0  -1  10  110.89    5.10
   0  -1  10  110.59    7.00
   0   1 -10  109.69    6.70
  -1  -1  10   93.19    6.50
  -1  -1  10   76.09    5.90
   1   1 -10   81.99    5.70
   1   1 -10   81.99    5.90
   1   1 -10   85.19    5.50
  -2  -1  10   93.59    6.90
  -2  -1  10   81.79    4.30
  -2  -1  10   75.19    4.60
  -2  -1  10   69.49    6.30
   2   1 -10   79.59    5.90
   2   1 -10   95.19    6.50
  -3  -1  10    9.50    3.40
  -3  -1  10    8.80    3.10
  -3  -1  10   11.70    2.00
  -3  -1  10   10.70    2.20
   3   1 -10    7.90    3.00
   3   1 -10    7.90    2.80
  -4  -1  10   42.40    3.70
  -4  -1  10   38.60    3.90
  -4  -1  10   45.10    3.50
  -4  -1  10   42.30    4.30
  -4  -1  10   31.40    3.50
  -4  -1  10   47.60    3.30
  -4  -1  10   43.70    5.30
  -4  -1  10   37.30    3.80
   4   1 -10   38.90    4.90
  -5  -1  10  394.56   14.70
  -5  -1  10  382.86   14.30
  -5  -1  10  385.46   13.90
  -5  -1  10  393.46   14.30
  -5  -1  10  376.46   14.70
  -5  -1  10  396.36   14.60
  -5  -1  10  391.36   13.70
  -6  -1  10   15.50    2.10
  -6  -1  10   13.60    1.90
  -6  -1  10   15.40    1.80
  -6  -1  10   18.80    2.40
  -6  -1  10   13.10    2.20
   5  -1  11    7.40    1.90
   5  -1  11    5.90    1.80
  -5   1 -11    8.30    1.60
  -5   1 -11    9.20    1.80
  -5   1 -11    5.20    1.60
  -5   1 -11    6.60    1.50
   4  -1  11   17.00    2.60
   4  -1  11   12.30    2.10
   4  -1  11   15.30    2.20
  -4   1 -11   17.60    2.40
  -4   1 -11   20.70    2.60
  -4   1 -11    9.70    2.00
  -4   1 -11   18.80    2.20
   3  -1  11    4.60    1.80
   3  -1  11    3.20    1.60
   3  -1  11    2.50    1.80
  -3   1 -11    4.40    1.80
  -3   1 -11    3.20    1.80
  -3   1 -11    2.30    1.50
   2  -1  11   36.20    3.50
   2  -1  11   43.60    6.80
   2  -1  11   38.40    3.80
   2  -1  11   41.90    3.40
  -2   1 -11   38.60    4.50
  -2   1 -11   40.90    5.30
  -2   1 -11   37.30    3.60
  -2   1 -11   41.60    3.60
  -2   1 -11   38.70    3.60
   1  -1  11   11.20    3.20
   1  -1  11   10.40    2.00
  -1   1 -11   10.50    2.00
  -1   1 -11   10.40    3.10
   0  -1  11  123.19    8.00
   0  -1  11  121.19    5.80
   0   1 -11  126.49    5.80
   0   1 -11  119.79    7.50
  -1  -1  11  284.27   13.00
  -1  -1  11  261.07   10.10
   1   1 -11  251.57   12.10
   1   1 -11  280.37   10.20
   1   1 -11  267.27   12.30
  -2  -1  11  427.76   19.00
  -2  -1  11  485.95   16.20
  -2  -1  11  457.75   16.60
   2   1 -11  465.75   16.10
   2   1 -11  446.46   18.30
   2   1 -11  477.65   18.90
  -3  -1  11    6.70    1.70
  -3  -1  11    7.80    1.80
  -3  -1  11    2.60    1.90
  -3  -1  11    5.40    2.30
  -3  -1  11    4.00    2.50
  -3  -1  11    5.50    2.00
  -3  -1  11    7.70    2.30
  -3  -1  11   13.50    2.40
   3   1 -11    9.90    3.00
  -4  -1  11   21.10    3.20
  -4  -1  11   23.60    3.00
  -4  -1  11   14.60    2.60
  -4  -1  11   19.30    2.40
  -4  -1  11   18.40    2.60
  -4  -1  11   23.70    3.00
  -4  -1  11   19.10    2.40
   4   1 -11   21.60    4.10
  -5  -1  11    2.30    2.00
  -5  -1  11    3.40    1.90
  -5  -1  11    4.60    1.80
  -5  -1  11    5.50    1.90
  -5  -1  11    2.50    1.70
  -5  -1  11    5.10    1.60
  -5  -1  11    2.10    1.40
  -6  -1  11   10.10    1.80
  -6  -1  11    5.00    1.20
  -6  -1  11    7.60    1.30
  -6  -1  11    9.50    1.70
  -6  -1  11    8.80    1.70
   6   1 -11    9.20    1.50
   5  -1  12    2.10    1.30
   5  -1  12    5.70    1.40
  -5   1 -12    1.50    1.10
  -5   1 -12    0.50    1.10
  -5   1 -12    1.90    1.30
  -5   1 -12    1.60    1.00
   4  -1  12   12.00    2.20
   4  -1  12    8.80    1.80
  -4   1 -12   11.60    2.00
  -4   1 -12    9.50    1.90
  -4   1 -12    8.40    1.70
   3  -1  12  127.39    5.90
   3  -1  12  136.29    6.20
   3  -1  12  126.79    6.00
  -3   1 -12  132.29    5.60
  -3   1 -12  117.39    5.90
  -3   1 -12  114.39    5.80
   2  -1  12   98.29    5.30
   2  -1  12   99.59    5.40
   2  -1  12   96.19    5.40
  -2   1 -12  101.59    5.40
  -2   1 -12   91.29    5.20
  -2   1 -12  103.29    4.70
   1  -1  12  211.38   10.60
   1  -1  12  218.98    8.80
   1  -1  12  227.18    8.40
   1  -1  12  239.18    9.20
   1  -1  12  221.28    9.30
  -1   1 -12  231.28   11.70
  -1   1 -12  240.58    9.30
  -1   1 -12  228.48    9.00
  -1   1 -12  233.78    8.30
   0  -1  12   94.49    4.70
   0  -1  12   95.19    7.70
   0  -1  12   97.39    5.40
   0  -1  12   90.49    5.40
   0   1 -12   96.09    4.90
   0   1 -12  106.39    5.10
   0   1 -12   98.99    7.20
  -1  -1  12  145.39    7.00
  -1  -1  12  144.69    6.90
  -1  -1  12  138.69    6.30
  -1  -1  12  137.79    6.10
   1   1 -12  143.99    6.40
   1   1 -12  136.89    6.20
   1   1 -12  146.79    8.50
  -2  -1  12   77.29    5.20
  -2  -1  12   71.59    4.10
  -2  -1  12   77.79    4.50
  -2  -1  12   83.09    4.90
  -2  -1  12   77.99    5.40
   2   1 -12   71.09    6.10
   2   1 -12   72.59    4.40
  -3  -1  12   38.20    3.30
  -3  -1  12   40.70    3.90
  -3  -1  12   33.80    3.30
  -3  -1  12   33.80    3.40
  -3  -1  12   35.60    3.50
  -3  -1  12   36.90    3.00
  -3  -1  12   33.40    3.90
  -3  -1  12   38.50    3.80
   3   1 -12   40.20    5.00
   3   1 -12   42.80    3.20
  -4  -1  12   88.49    4.40
  -4  -1  12   87.99    5.70
  -4  -1  12   88.59    5.10
  -4  -1  12   95.59    4.90
  -4  -1  12   86.59    4.60
  -4  -1  12   86.49    5.20
  -4  -1  12   79.39    5.20
  -4  -1  12   90.29    5.00
   4   1 -12   88.29    4.60
  -5  -1  12   21.10    2.10
  -5  -1  12   19.50    2.20
  -5  -1  12   24.10    2.70
  -5  -1  12   19.50    2.80
  -5  -1  12   21.30    2.50
  -5  -1  12   21.90    2.50
   5   1 -12   22.40    2.20
  -6  -1  12   87.09    3.50
  -6  -1  12   76.09    3.90
  -6  -1  12   87.99    4.70
  -6  -1  12   82.99    3.90
  -6  -1  12   85.79    4.00
   4  -1  13   92.99    4.70
   4  -1  13  106.59    4.60
  -4   1 -13  106.89    4.70
  -4   1 -13  100.79    4.30
  -4   1 -13  105.09    4.90
   3  -1  13    1.80    1.50
   3  -1  13   -1.70    1.30
   3  -1  13   -3.50    1.40
  -3   1 -13   -1.00    1.10
  -3   1 -13    2.00    1.60
  -3   1 -13   -0.70    1.40
   2  -1  13    8.40    1.90
   2  -1  13   12.20    2.40
   2  -1  13    9.30    2.20
  -2   1 -13   10.50    1.50
  -2   1 -13   11.50    2.10
   1  -1  13    0.00    1.70
   1  -1  13    2.60    1.80
   1  -1  13    0.80    1.60
  -1   1 -13    2.70    1.50
  -1   1 -13    3.90    3.20
  -1   1 -13    2.40    1.50
   0  -1  13  398.76   14.30
   0  -1  13  379.26   13.80
   0  -1  13  379.26   14.40
   0  -1  13  384.56   13.60
   0   1 -13  417.36   14.30
   0   1 -13  390.96   16.70
   0   1 -13  387.36   13.90
  -1  -1  13  204.88    8.30
  -1  -1  13  191.98    7.90
  -1  -1  13  190.48    8.40
  -1  -1  13  201.98    7.90
  -1  -1  13  198.98    8.70
   1   1 -13  182.68   10.20
   1   1 -13  208.58    8.30
   1   1 -13  197.78    7.90
  -2  -1  13    2.80    1.50
  -2  -1  13    0.80    1.40
  -2  -1  13    2.30    2.10
  -2  -1  13    2.50    2.10
   2   1 -13    2.40    1.50
   2   1 -13    4.00    2.60
  -3  -1  13   22.80    2.90
  -3  -1  13   25.90    3.30
  -3  -1  13   22.60    2.50
  -3  -1  13   20.60    2.70
  -3  -1  13   23.60    2.40
  -3  -1  13   23.30    2.70
  -3  -1  13   24.60    3.00
   3   1 -13   21.60    2.40
  -4  -1  13    4.30    1.40
  -4  -1  13    6.70    1.70
  -4  -1  13    7.20    1.90
  -4  -1  13    3.20    1.80
  -4  -1  13    4.00    1.50
  -4  -1  13    4.00    2.00
  -4  -1  13    5.80    1.80
  -4  -1  13    3.90    1.50
   4   1 -13    4.80    1.50
  -5  -1  13   24.30    2.10
  -5  -1  13   21.30    2.00
  -5  -1  13   23.40    2.30
  -5  -1  13   27.50    2.70
  -5  -1  13   24.40    2.50
  -5  -1  13   23.30    2.40
   5   1 -13   22.60    2.10
   4  -1  14   19.20    2.00
   3  -1  14   16.90    2.10
   3  -1  14   15.30    2.00
   2  -1  14   23.40    2.50
   2  -1  14   19.10    2.50
   1  -1  14   89.29    5.00
   1  -1  14   86.59    5.30
  -1   1 -14   87.49    4.80
  -1   1 -14   88.29    4.50
   0  -1  14   52.19    3.20
   0  -1  14   52.79    4.00
   0  -1  14   51.09    3.40
   0  -1  14   54.39    4.10
   0   1 -14   50.19    3.40
   0   1 -14   49.60    3.60
  -1  -1  14    2.10    1.90
  -1  -1  14    0.40    1.80
  -1  -1  14    3.30    1.50
  -1  -1  14    3.40    1.40
   1   1 -14    3.40    1.60
   1   1 -14    1.70    1.40
  -2  -1  14   23.00    2.70
  -2  -1  14   21.80    3.60
  -2  -1  14   19.90    2.80
  -2  -1  14   22.40    2.30
  -2  -1  14   21.80    2.90
   2   1 -14   21.10    2.40
   2   1 -14   25.70    2.50
  -3  -1  14   31.30    2.90
  -3  -1  14   26.70    3.00
  -3  -1  14   27.10    3.20
  -3  -1  14   31.60    2.70
  -3  -1  14   31.80    2.80
  -3  -1  14   30.10    3.00
   3   1 -14   35.40    2.70
   3   1 -14   29.50    2.80
  -4  -1  14    1.90    1.30
  -4  -1  14    0.20    1.50
  -4  -1  14    1.90    1.60
  -4  -1  14   -1.60    1.20
  -4  -1  14   -2.30    1.20
  -4  -1  14   -0.10    1.10
  -4  -1  14    1.70    1.30
   4   1 -14    3.30    1.20
   4   1 -14    0.00    1.10
  -5  -1  14    1.20    1.00
  -5  -1  14    1.20    1.10
  -5  -1  14    0.40    1.00
  -5  -1  14    1.70    0.90
  -5  -1  14    1.20    1.00
   5   1 -14    1.20    0.90
   3  -1  15   62.89    3.20
   3  -1  15   70.79    3.40
   2  -1  15   55.79    3.50
   1  -1  15    5.80    1.70
  -1   1 -15    5.50    1.50
   0  -1  15   30.10    3.00
   0  -1  15   30.00    3.00
   0   1 -15   26.20    2.60
   0   1 -15   28.90    2.50
  -1  -1  15   75.79    4.50
  -1  -1  15   68.89    3.70
  -1  -1  15   71.19    3.80
  -1  -1  15   69.59    4.20
   1   1 -15   67.89    3.90
   1   1 -15   68.99    3.70
  -2  -1  15    0.50    1.60
  -2  -1  15    0.00    1.20
  -2  -1  15    1.00    1.60
  -2  -1  15    1.30    1.20
   2   1 -15    2.60    1.40
   2   1 -15    1.50    1.30
  -3  -1  15    5.40    1.50
  -3  -1  15    7.20    1.80
  -3  -1  15    4.50    1.30
  -3  -1  15    2.80    1.60
  -3  -1  15    7.90    1.70
   3   1 -15    5.80    1.30
   3   1 -15    5.10    1.30
  -4  -1  15   -0.60    1.10
  -4  -1  15    1.00    1.20
  -4  -1  15   -1.10    1.00
  -4  -1  15    0.70    1.00
  -4  -1  15    0.30    0.90
   4   1 -15   -0.50    0.90
   2  -1  16    2.80    1.20
   1  -1  16   19.20    2.00
   0  -1  16    1.30    1.30
   0  -1  16    1.00    1.40
   0   1 -16    1.60    1.10
  -1  -1  16    2.30    1.10
  -1  -1  16    1.50    1.30
   1   1 -16    0.20    1.00
   1   1 -16    0.50    1.00
  -2  -1  16    0.90    1.10
  -2  -1  16    2.90    1.40
  -2  -1  16    1.80    1.10
   2   1 -16    4.20    1.10
  -3  -1  16   10.40    1.30
  -3  -1  16   11.50    1.60
  -3  -1  16   13.40    1.50
  -3  -1  16   12.60    1.60
   3   1 -16   13.20    1.40
  -1  -1  17   13.10    2.10
  -1   2  17    4.50    1.30
   3  -2 -16    1.40    0.90
  -3   2  16    2.20    1.10
  -3   2  16    1.50    0.90
  -3   2  16   -0.70    1.10
   2  -2 -16    0.40    1.00
  -2   2  16    1.40    1.10
  -2   2  16    1.20    1.40
  -2   2  16    2.80    1.00
  -2   2  16    1.60    1.40
  -1   2  16   15.00    1.30
  -1   2  16   11.50    1.90
   0   2  16   -1.20    1.40
   0   2  16    2.40    1.30
   1   2  16    0.00    1.30
   1   2  16   -0.80    1.20
   2   2  16    1.10    1.10
   4  -2 -15    3.00    1.00
  -4   2  15    4.40    1.10
  -4   2  15    3.30    1.30
  -4   2  15    2.30    1.20
   3  -2 -15   -1.00    1.00
   3  -2 -15    0.20    1.10
  -3   2  15   -0.90    1.00
  -3   2  15    0.30    1.40
  -3   2  15   -0.10    1.20
  -3   2  15   -1.40    1.10
  -3   2  15    1.10    1.50
   2  -2 -15   27.50    2.60
   2  -2 -15   27.60    2.50
  -2   2  15   31.30    3.20
  -2   2  15   31.00    3.10
  -2   2  15   33.10    2.60
  -2   2  15   30.10    2.40
   1  -2 -15   13.30    1.90
   1  -2 -15   16.90    2.00
  -1   2  15   15.90    1.80
  -1   2  15   14.30    1.90
  -1   2  15   16.30    2.50
   0   2  15   38.10    3.40
   0   2  15   34.90    3.30
   1   2  15    3.10    1.70
   1   2  15    0.30    1.50
  -2  -2 -15    2.10    1.20
   2   2  15    2.20    1.40
  -3  -2 -15    0.30    1.10
   3   2  15    0.40    1.10
  -5   2  14   24.00    1.90
  -5   2  14   30.50    2.00
  -5   2  14   27.50    2.30
  -5   2  14   28.20    2.20
  -5   2  14   30.40    2.10
   4  -2 -14   11.00    1.70
  -4   2  14   10.70    1.90
  -4   2  14   10.10    1.50
  -4   2  14   11.20    1.70
  -4   2  14   12.00    2.10
  -4   2  14   11.90    1.70
  -4   2  14    9.80    1.70
   3  -2 -14    1.40    1.30
  -3   2  14    0.60    1.70
  -3   2  14    1.90    1.20
  -3   2  14    2.60    1.80
  -3   2  14    2.90    1.60
  -3   2  14    2.20    1.40
   2  -2 -14    0.90    1.30
   2  -2 -14    2.50    1.40
  -2   2  14   -2.70    1.60
  -2   2  14   -1.60    1.20
  -2   2  14   -1.20    1.40
  -2   2  14   -1.40    1.20
  -2   2  14    0.50    1.80
   1  -2 -14   44.20    3.30
   1  -2 -14   52.09    3.40
  -1   2  14   47.80    4.20
  -1   2  14   48.00    3.30
  -1   2  14   53.19    3.30
  -1   2  14   53.79    4.20
   0   2  14    7.70    2.10
   0   2  14    8.70    2.10
   0   2  14    7.30    1.40
  -1  -2 -14    7.20    1.70
   1   2  14    6.60    2.10
   1   2  14    8.40    2.10
  -2  -2 -14   23.80    2.60
   2   2  14   20.00    2.50
  -3  -2 -14   34.70    2.00
  -3  -2 -14   36.00    2.90
   3   2  14   32.60    3.00
   3   2  14   35.10    2.80
  -4  -2 -14    0.30    0.90
   4   2  14   -1.70    1.00
   4   2  14    0.40    1.00
   5  -2 -13    1.80    1.10
  -5   2  13   -0.60    1.20
  -5   2  13    0.30    1.10
  -5   2  13    0.00    1.20
  -5   2  13    0.40    1.10
  -5   2  13   -0.70    1.30
  -5   2  13    0.20    1.00
   4  -2 -13   37.00    2.90
  -4   2  13   35.90    3.10
  -4   2  13   39.60    3.00
  -4   2  13   35.80    3.10
  -4   2  13   37.00    3.00
  -4   2  13   37.90    2.80
  -4   2  13   38.80    3.40
  -4   2  13   39.70    3.70
   3  -2 -13    0.30    1.30
  -3   2  13    2.20    2.10
  -3   2  13    2.40    1.80
  -3   2  13    1.20    1.50
  -3   2  13   -1.40    1.20
  -3   2  13    2.20    1.80
  -3   2  13   -1.40    1.70
   2  -2 -13   72.19    6.30
   2  -2 -13   70.49    4.10
  -2   2  13   70.19    4.20
  -2   2  13   69.99    5.10
  -2   2  13   72.09    4.00
  -2   2  13   76.49    4.90
   1  -2 -13  101.99    4.90
   1  -2 -13   86.69    6.90
   1  -2 -13  104.79    5.10
  -1   2  13  100.19    5.00
  -1   2  13   90.29    5.80
  -1   2  13   96.29    5.60
  -1   2  13   96.69    4.80
  -1   2  13   95.39    4.90
   0   2  13  111.49    5.20
   0   2  13  116.09    5.90
   0   2  13  121.79    6.10
  -1  -2 -13   24.50    2.80
  -1  -2 -13   22.00    2.00
   1   2  13   32.40    3.30
   1   2  13   26.40    3.10
  -2  -2 -13   -0.30    1.40
  -2  -2 -13    0.20    1.20
   2   2  13    1.50    1.70
   2   2  13    0.10    1.60
  -3  -2 -13   -0.20    1.30
  -3  -2 -13    0.40    1.20
  -3  -2 -13    2.70    1.40
   3   2  13    0.50    1.40
   3   2  13   -0.90    1.40
   3   2  13    0.60    1.60
  -4  -2 -13   -1.00    1.30
  -4  -2 -13    1.60    1.10
  -4  -2 -13    2.50    1.30
   4   2  13    1.50    1.40
   4   2  13    1.40    1.40
  -6   2  12   46.00    2.80
  -6   2  12   45.80    2.50
  -6   2  12   45.70    2.90
  -6   2  12   55.29    3.00
   5  -2 -12   75.59    3.90
  -5   2  12   71.59    4.30
  -5   2  12   72.39    4.10
  -5   2  12   68.49    4.20
  -5   2  12   65.89    3.60
  -5   2  12   72.39    3.90
  -4   2  12   45.40    4.20
  -4   2  12   47.10    3.50
  -4   2  12   51.89    3.80
  -4   2  12   47.40    4.00
  -4   2  12   48.90    3.40
  -4   2  12   47.90    3.70
  -4   2  12   48.10    4.00
   3  -2 -12  246.08   12.20
   3  -2 -12  260.37   10.10
  -3   2  12  271.77   10.70
  -3   2  12  253.87   10.10
  -3   2  12  264.57   10.90
  -3   2  12  266.37   10.80
  -3   2  12  268.67    9.90
  -3   2  12  272.77   11.30
  -3   2  12  266.77   10.60
   2  -2 -12   43.90    5.10
   2  -2 -12   40.30    3.30
  -2   2  12   39.00    4.20
  -2   2  12   49.70    3.50
  -2   2  12   38.80    3.80
  -2   2  12   43.90    4.20
  -2   2  12   41.80    3.20
   1  -2 -12   51.19    5.60
   1  -2 -12   58.09    3.50
   1  -2 -12   43.70    6.00
  -1   2  12   43.00    4.20
  -1   2  12   45.60    3.30
  -1   2  12   44.80    8.60
  -1   2  12   45.30    3.40
  -1   2  12   40.10    4.30
   0  -2 -12   33.30    4.70
   0  -2 -12   25.90    2.70
   0  -2 -12   30.70    2.90
   0   2  12   33.00    3.30
   0   2  12   31.40    8.00
   0   2  12   26.70    2.70
   0   2  12   25.10    3.20
   0   2  12   25.50    3.20
  -1  -2 -12   38.70    3.50
  -1  -2 -12   42.50    2.80
   1   2  12   42.60    3.90
   1   2  12   41.10    2.60
   1   2  12   44.50    3.70
  -2  -2 -12    4.90    1.90
  -2  -2 -12    2.40    1.60
  -2  -2 -12    3.50    1.70
  -2  -2 -12    6.30    1.60
   2   2  12    6.90    2.70
   2   2  12    5.70    1.90
   2   2  12    7.10    1.90
  -3  -2 -12   39.70    3.40
  -3  -2 -12   41.10    3.10
  -3  -2 -12   34.90    3.30
  -3  -2 -12   33.90    3.30
   3   2  12   35.90    3.50
   3   2  12   35.60    3.30
   3   2  12   37.20    3.30
  -4  -2 -12   37.10    2.90
  -4  -2 -12   39.70    3.20
  -4  -2 -12   40.40    3.40
   4   2  12   38.90    3.30
   4   2  12   46.00    3.10
  -5  -2 -12   10.10    1.40
  -5  -2 -12    8.90    1.50
  -5  -2 -12    8.20    1.50
   5   2  12    8.80    1.60
  -6   2  11   28.90    2.30
  -6   2  11   31.80    2.60
  -6   2  11   26.10    2.60
  -6   2  11   26.60    2.60
  -6   2  11   20.50    2.10
  -5   2  11   95.29    5.00
  -5   2  11   94.39    5.10
  -5   2  11   79.99    5.00
  -5   2  11   87.59    5.30
  -5   2  11   85.89    4.40
  -5   2  11   83.79    4.70
  -5   2  11   86.19    4.60
   4  -2 -11   28.50    4.50
  -4   2  11   25.20    2.60
  -4   2  11   19.80    4.10
  -4   2  11   28.70    3.50
  -4   2  11   21.90    2.70
  -4   2  11   25.70    3.50
  -4   2  11   22.40    2.90
  -4   2  11   20.80    3.10
  -4   2  11   19.30    2.80
   3  -2 -11   40.00    5.10
  -3   2  11   34.30    3.50
  -3   2  11   39.20    4.00
  -3   2  11   45.50    4.10
  -3   2  11   38.70    4.30
  -3   2  11   40.00    3.40
  -3   2  11   37.20    3.90
  -3   2  11   37.00    3.60
  -3   2  11   38.90    3.20
   2  -2 -11   74.89    6.10
   2  -2 -11   76.69    4.30
   2  -2 -11   86.29    6.50
  -2   2  11   77.89    7.10
  -2   2  11   71.09    4.10
  -2   2  11   67.39    4.70
   1  -2 -11   55.29    5.70
   1  -2 -11   50.49    3.50
   1  -2 -11   48.40    5.30
  -1   2  11   46.20    5.80
  -1   2  11   46.80    3.50
   0  -2 -11   49.99    3.50
   0  -2 -11   60.89    5.30
   0   2  11   49.99    3.50
   0   2  11   53.49    6.00
   1   2  11  303.37   13.80
   1   2  11  303.57   11.20
  -2  -2 -11   54.09    3.90
  -2  -2 -11   48.00    3.80
  -2  -2 -11   53.89    3.90
  -2  -2 -11   56.69    3.60
   2   2  11   62.19    3.90
   2   2  11   52.39    4.00
   2   2  11   61.39    4.30
  -3  -2 -11    4.30    1.80
  -3  -2 -11    6.40    1.70
  -3  -2 -11    4.70    1.70
  -3  -2 -11    5.00    2.00
   3   2  11    4.30    1.90
   3   2  11    3.60    1.80
   3   2  11    5.40    1.80
  -4  -2 -11   17.90    2.50
  -4  -2 -11   19.50    2.30
  -4  -2 -11   19.70    2.50
   4   2  11   25.00    2.70
   4   2  11   16.40    2.20
   4   2  11   19.00    2.40
  -5  -2 -11    0.20    1.20
  -5  -2 -11   -0.10    1.30
  -5  -2 -11    0.30    1.30
  -5  -2 -11    2.40    1.40
   5   2  11    1.10    1.50
  -7   2  10   17.00    1.80
  -7   2  10   27.20    2.00
  -6   2  10  211.78    8.30
  -6   2  10  200.28    8.10
  -6   2  10  209.58    7.90
  -6   2  10  213.48    8.30
  -6   2  10  219.38    8.50
  -5   2  10    3.80    2.30
  -5   2  10    4.10    1.50
  -5   2  10    7.50    2.40
  -5   2  10    5.00    1.70
  -5   2  10    4.80    2.00
  -5   2  10    5.30    2.20
  -5   2  10    5.10    2.10
   4  -2 -10   37.00    5.10
  -4   2  10   37.80    3.70
  -4   2  10   35.50    3.20
  -4   2  10   34.90    4.00
  -4   2  10   33.70    3.70
  -4   2  10   35.00    4.80
  -4   2  10   38.70    3.70
  -4   2  10   40.70    3.50
  -4   2  10   42.20    4.20
   3  -2 -10   26.60    4.10
   3  -2 -10   27.30    4.40
  -3   2  10   42.90    6.30
  -3   2  10   25.60    3.30
  -3   2  10   25.00    2.80
  -3   2  10   24.50    4.20
  -3   2  10   26.10    4.70
   2  -2 -10   36.80    4.60
   2  -2 -10   34.00    4.80
  -2   2  10   34.90    3.30
  -2   2  10   29.70    4.90
  -2   2  10   40.20    5.30
  -2   2  10   34.20    4.40
  -2   2  10   32.20    3.00
   1  -2 -10    7.80    2.30
   1  -2 -10    5.30    2.20
  -1   2  10    4.10    2.50
   0  -2 -10   14.70    3.00
   0  -2 -10    8.20    2.60
   0   2  10   12.40    3.30
   1   2  10   16.10    2.10
   1   2  10   18.90    4.00
   2   2  10   17.50    3.50
   2   2  10   14.20    2.20
  -3  -2 -10    1.90    1.50
  -3  -2 -10    2.10    1.50
  -3  -2 -10    2.10    1.70
   3   2  10    1.60    1.70
   3   2  10   -0.70    1.80
  -4  -2 -10   19.00    2.70
  -4  -2 -10   16.30    2.20
  -4  -2 -10   16.10    2.40
  -4  -2 -10   19.00    2.60
  -4  -2 -10   15.30    2.40
   4   2  10   17.70    2.40
   4   2  10   18.80    2.30
  -5  -2 -10    4.60    1.50
  -5  -2 -10    1.80    1.50
  -5  -2 -10    3.80    1.50
  -5  -2 -10    5.20    1.70
   5   2  10    4.10    1.50
   5   2  10    4.10    1.80
  -6  -2 -10    0.80    1.10
  -6  -2 -10    4.10    1.30
  -6  -2 -10    2.30    1.20
  -6  -2 -10    4.20    1.30
   6   2  10    2.30    1.30
  -7   2   9   12.90    1.60
  -7   2   9   12.90    1.70
  -7   2   9    8.60    1.30
  -6   2   9   97.19    4.60
  -6   2   9   95.69    5.20
  -6   2   9   93.89    4.90
  -6   2   9  100.59    5.20
  -6   2   9  102.89    5.30
   5  -2  -9   10.10    3.20
  -5   2   9   10.70    2.10
  -5   2   9   11.70    3.70
  -5   2   9    8.80    2.30
  -5   2   9    7.80    2.30
  -5   2   9    5.80    2.10
  -5   2   9   14.60    2.90
  -5   2   9    7.70    1.90
   4  -2  -9    6.00    3.00
   4  -2  -9   11.10    3.10
  -4   2   9   12.60    2.20
  -4   2   9   15.60    4.30
  -4   2   9    8.90    3.40
  -4   2   9   13.40    2.70
  -4   2   9    4.90    3.50
   3  -2  -9   63.89    5.60
   3  -2  -9   65.59    5.50
  -3   2   9   64.29    6.00
  -3   2   9   70.19    4.10
  -3   2   9   62.49    4.30
  -3   2   9   58.59    5.50
  -3   2   9   59.09    6.70
   2  -2  -9  121.29    7.20
   2  -2  -9  135.59    7.20
  -2   2   9  132.39    8.00
  -2   2   9  116.29    5.90
  -2   2   9  111.89    7.30
  -2   2   9  131.19    7.30
   1  -2  -9  103.09    6.30
   1  -2  -9  111.79    6.30
  -1   2   9   99.89    5.10
   0  -2  -9  229.78   10.00
   0  -2  -9  213.08    9.80
   0   2   9  234.98   10.50
  -1  -2  -9    1.80    1.90
   1   2   9   -0.50    1.10
   1   2   9    2.10    1.90
   2   2   9    1.00    1.30
   2   2   9    0.10    1.90
   2   2   9    1.20    2.20
   3   2   9   -0.20    2.60
   3   2   9    2.00    1.70
   3   2   9    9.20    3.30
  -4  -2  -9   48.80    3.90
  -4  -2  -9   43.20    4.00
  -4  -2  -9   42.60    3.50
  -4  -2  -9   47.70    3.60
  -4  -2  -9   40.20    3.60
  -4  -2  -9   48.60    4.00
   4   2   9   41.80    3.70
   4   2   9   45.00    3.70
  -5  -2  -9   19.00    2.80
  -5  -2  -9   23.90    2.80
  -5  -2  -9   18.90    2.60
  -5  -2  -9   19.10    2.50
  -5  -2  -9   19.30    2.70
  -5  -2  -9   19.70    2.50
  -5  -2  -9   19.30    2.50
   5   2   9   22.70    2.60
  -6  -2  -9   45.60    3.10
  -6  -2  -9   43.60    3.20
  -6  -2  -9   43.30    3.20
  -6  -2  -9   51.99    3.20
  -6  -2  -9   41.20    3.10
  -6  -2  -9   40.30    3.10
   6   2   9   45.50    3.20
  -7   2   8   30.90    2.60
  -7   2   8   20.00    2.10
  -7   2   8   27.50    2.20
  -7   2   8   28.30    3.00
  -6   2   8    2.30    1.40
  -6   2   8    2.60    1.80
  -6   2   8    0.30    1.40
  -6   2   8    2.10    1.80
   5  -2  -8   56.69    6.30
  -5   2   8   63.79    4.30
  -5   2   8   71.39    4.90
  -5   2   8   67.49    4.80
  -5   2   8   67.09    4.10
  -5   2   8   67.89    4.80
  -5   2   8   68.49    5.00
  -5   2   8   73.29    6.60
   4  -2  -8    0.50    2.10
   4  -2  -8    2.30    2.30
  -4   2   8   -3.70    2.20
  -4   2   8   -1.20    2.60
  -4   2   8    1.20    1.80
  -4   2   8   -0.90    1.30
  -4   2   8    2.20    2.50
   3  -2  -8   97.99    6.50
   3  -2  -8   94.39    6.40
  -3   2   8   99.89    6.60
  -3   2   8   97.69    5.20
  -3   2   8  106.39    7.20
  -3   2   8   90.49    6.70
   2  -2  -8  181.68    8.90
   2  -2  -8  192.48    8.80
  -2   2   8  183.08    9.20
  -2   2   8  193.28    7.80
  -2   2   8  187.98    9.50
  -2   2   8  185.58    8.90
   1  -2  -8  803.12   28.60
   1  -2  -8  845.22   28.40
  -1   2   8  840.22   29.10
  -1   2   8  864.21   28.70
  -1   2   8  811.42   28.40
   0  -2  -8  166.68    7.60
   0  -2  -8  173.98    7.90
   0   2   8  172.38    8.10
  -1  -2  -8  482.55   17.40
   1   2   8  457.45   15.80
   1   2   8  466.45   17.20
   1   2   8  485.05   17.70
  -2  -2  -8   58.29    3.40
   2   2   8   58.69    4.80
   2   2   8   56.49    3.40
   2   2   8   55.79    4.80
  -3  -2  -8 1078.99   36.40
  -3  -2  -8 1137.19   36.50
   3   2   8 1141.59   36.40
   3   2   8 1114.29   38.60
   3   2   8 1133.99   38.80
  -4  -2  -8   16.90    2.90
  -4  -2  -8   16.60    2.70
  -4  -2  -8   18.20    2.80
  -4  -2  -8   17.00    2.50
  -4  -2  -8   17.40    2.40
  -4  -2  -8   11.50    2.50
   4   2   8   19.90    2.50
   4   2   8   14.30    3.70
   4   2   8   20.60    4.00
  -5  -2  -8    3.00    1.90
  -5  -2  -8    0.80    1.50
  -5  -2  -8   -0.10    1.50
  -5  -2  -8   -1.60    1.40
  -5  -2  -8    3.80    1.80
  -5  -2  -8    2.80    1.70
  -5  -2  -8    2.30    1.70
   5   2   8    0.00    1.50
  -6  -2  -8    1.20    1.40
  -6  -2  -8   -0.60    1.40
  -6  -2  -8    1.00    1.40
  -6  -2  -8    0.60    1.30
  -6  -2  -8   -0.40    1.50
  -6  -2  -8    2.80    1.50
   6   2   8    0.80    1.60
  -7  -2  -8   17.80    1.80
  -7  -2  -8   22.10    2.20
  -7   2   7   -0.30    1.10
  -7   2   7    1.60    1.30
  -7   2   7    2.40    1.40
  -6   2   7  104.09    5.10
  -6   2   7  106.89    5.70
  -6   2   7  107.59    5.40
  -6   2   7  112.19    5.90
   5  -2  -7    4.00    3.30
  -5   2   7    1.40    1.40
  -5   2   7   -0.90    2.10
  -5   2   7   -0.20    1.70
  -5   2   7    0.60    2.00
  -5   2   7   -2.30    1.80
  -5   2   7    2.80    2.90
  -5   2   7   -1.40    2.90
  -5   2   7    3.10    2.70
  -5   2   7   -0.20    1.30
   4  -2  -7   95.39    6.50
  -4   2   7   87.09    6.90
  -4   2   7   95.79    5.30
  -4   2   7   98.79    4.80
  -4   2   7   84.59    6.50
  -4   2   7   89.49    7.10
   3  -2  -7    2.40    1.90
  -3   2   7    2.00    1.80
  -3   2   7    1.30    1.90
  -3   2   7    3.00    1.50
  -3   2   7    2.20    1.90
   2  -2  -7 2362.86   73.79
   2  -2  -7 2318.87   73.99
  -2   2   7 2308.97   73.69
  -2   2   7 2229.68   74.29
  -2   2   7 2253.97   74.19
   1  -2  -7   36.10    3.40
   1  -2  -7   41.20    3.40
  -1   2   7   43.80    3.70
  -1   2   7   37.00    3.60
  -1   2   7   37.40    3.40
   0  -2  -7 1144.89   36.60
   0  -2  -7 1092.69   36.30
   0   2   7 1089.39   36.80
   0   2   7 1109.99   36.30
  -1  -2  -7   35.50    3.30
   1   2   7   35.90    3.50
   1   2   7   36.80    3.40
  -2  -2  -7   -0.10    0.90
   2   2   7    1.10    1.50
   2   2   7   -0.20    1.60
   2   2   7   -0.30    1.00
  -3  -2  -7    3.90    1.30
  -3  -2  -7    3.70    1.50
  -3  -2  -7    5.80    2.30
   3   2   7    4.10    1.40
   3   2   7    8.20    2.40
   3   2   7    8.90    2.40
  -4  -2  -7    3.30    1.50
  -4  -2  -7    7.50    1.70
  -4  -2  -7    0.10    2.50
   4   2   7    5.50    2.80
   4   2   7    5.30    3.30
   4   2   7    2.50    2.50
   4   2   7    0.00    1.40
  -5  -2  -7   10.10    2.30
  -5  -2  -7   11.80    2.20
  -5  -2  -7   10.90    2.40
  -5  -2  -7   11.40    2.20
  -5  -2  -7   11.40    2.20
  -5  -2  -7    9.90    2.20
  -5  -2  -7   13.10    2.40
  -5  -2  -7   13.80    2.40
   5   2   7   13.00    2.20
  -6  -2  -7   35.90    3.30
  -6  -2  -7   33.20    3.30
  -6  -2  -7   34.00    3.40
  -6  -2  -7   33.40    3.40
  -6  -2  -7   31.40    3.10
  -6  -2  -7   35.50    3.40
  -6  -2  -7   30.10    3.10
   6   2   7   34.40    3.00
  -7  -2  -7    5.50    1.40
  -7  -2  -7    5.30    1.40
  -7  -2  -7    6.80    1.50
  -7  -2  -7    5.90    1.40
  -7  -2  -7    5.40    1.40
  -7   2   6    0.70    1.30
  -7   2   6    3.00    1.70
  -7   2   6   -0.50    1.20
  -6   2   6   17.40    2.80
  -6   2   6   22.50    4.20
  -6   2   6   21.90    2.40
  -6   2   6   20.80    2.50
  -6   2   6   25.60    3.10
   5  -2  -6   90.59    7.60
  -5   2   6  103.79    5.20
  -5   2   6  107.39    8.00
  -5   2   6   94.29    7.50
  -5   2   6   94.59    7.00
   4  -2  -6   92.09    6.00
  -4   2   6   91.99    6.80
  -4   2   6   84.49    6.10
  -4   2   6   88.29    6.60
  -4   2   6   93.19    5.00
   3  -2  -6  433.26   16.40
  -3   2   6  429.16   17.00
  -3   2   6  447.86   15.30
  -3   2   6  415.96   17.00
  -3   2   6  443.26   16.50
   2  -2  -6   71.99    4.50
  -2   2   6   71.99    4.50
  -2   2   6   68.99    4.80
  -2   2   6   66.69    4.30
  -2   2   6   76.59    4.80
   1  -2  -6  290.97   11.20
   1  -2  -6  301.67   11.20
  -1   2   6  281.97   10.90
  -1   2   6  294.47   11.30
  -1   2   6  291.17   11.10
  -1   2   6  298.67   11.50
   0  -2  -6    4.10    2.30
   0  -2  -6    6.40    1.50
   0   2   6    3.80    1.50
  -1  -2  -6  763.62   26.60
   1   2   6  837.62   27.10
   1   2   6  811.22   26.90
  -2  -2  -6  318.27   12.50
   2   2   6  330.17   12.60
   2   2   6  325.97   12.60
  -3  -2  -6   11.30    2.50
  -3  -2  -6    9.60    1.70
  -3  -2  -6    9.10    1.60
  -3  -2  -6   13.60    2.70
   3   2   6   12.10    1.70
   3   2   6   14.10    2.80
   3   2   6   18.10    3.20
  -4  -2  -6  195.58    8.00
  -4  -2  -6  197.38    7.80
  -4  -2  -6  189.08    9.70
  -4  -2  -6  199.38   10.20
   4   2   6  193.18    9.80
   4   2   6  182.68    7.70
   4   2   6  182.28    9.40
  -5  -2  -6   25.20    3.10
  -5  -2  -6   24.10    3.00
  -5  -2  -6   22.00    2.90
  -5  -2  -6   19.70    2.90
  -5  -2  -6   26.20    3.00
  -5  -2  -6   22.10    2.80
  -5  -2  -6   22.70    2.50
  -5  -2  -6   25.70    3.30
   5   2   6   18.00    2.40
  -6  -2  -6    3.60    1.90
  -6  -2  -6    6.50    2.00
  -6  -2  -6    3.80    1.80
  -6  -2  -6    2.70    1.80
  -6  -2  -6    1.40    1.60
  -6  -2  -6    0.10    1.60
  -6  -2  -6    7.30    2.00
  -7  -2  -6   -0.70    1.30
  -7  -2  -6    1.10    1.30
  -7  -2  -6   -0.20    1.20
  -7  -2  -6    0.50    1.30
  -7  -2  -6    0.00    1.30
  -7   2   5    6.10    1.60
  -7   2   5    6.50    1.50
  -6   2   5   26.10    2.90
  -6   2   5   20.90    4.20
  -6   2   5   32.10    3.00
  -6   2   5   27.00    3.30
   5  -2  -5   50.19    6.30
  -5   2   5   49.70    6.00
  -5   2   5   49.00    5.60
  -5   2   5   43.10    5.60
  -5   2   5   46.70    3.50
  -4   2   5   19.40    3.50
  -4   2   5   23.50    3.80
  -4   2   5   24.40    2.80
  -4   2   5   18.80    3.30
   3  -2  -5   33.50    3.30
  -3   2   5   38.00    3.60
  -3   2   5   39.00    3.90
  -3   2   5   37.30    4.20
  -3   2   5   36.80    4.20
   2  -2  -5    0.10    1.00
  -2   2   5   -1.50    1.30
  -2   2   5   -0.40    1.30
  -2   2   5    0.60    1.30
  -2   2   5    1.30    1.30
   1  -2  -5  133.39    5.90
  -1   2   5  137.19    5.80
  -1   2   5  142.49    6.20
  -1   2   5  131.79    6.10
   0  -2  -5  476.85   15.90
   0  -2  -5  477.65   15.80
   0  -2  -5  429.56   17.90
   0   2   5  469.25   18.30
   0   2   5  470.75   15.70
   0   2   5  426.96   18.00
   0   2   5  446.26   16.00
   0   2   5  459.95   15.90
  -1  -2  -5  119.19    6.40
  -1  -2  -5  122.69    5.30
  -1  -2  -5  133.49    5.50
   1   2   5  122.29    5.60
   1   2   5  121.49    5.50
   1   2   5  110.09    6.60
   1   2   5  125.29    5.60
  -2  -2  -5   39.10    3.20
  -2  -2  -5   45.20    3.50
   2   2   5   49.60    3.50
   2   2   5   40.60    3.40
  -3  -2  -5   20.90    2.20
  -3  -2  -5   19.30    1.90
  -3  -2  -5   19.80    3.10
  -3  -2  -5   17.40    2.60
   3   2   5   16.00    2.50
   3   2   5   15.70    2.80
   3   2   5   20.10    2.00
  -4  -2  -5   11.00    3.00
  -4  -2  -5    8.90    2.60
  -4  -2  -5    7.50    1.80
  -4  -2  -5   10.40    1.80
   4   2   5    8.70    1.70
   4   2   5   11.20    2.40
   4   2   5   10.80    3.10
  -5  -2  -5    1.20    1.70
  -5  -2  -5    0.40    1.40
  -5  -2  -5    3.90    2.80
  -5  -2  -5    0.00    2.30
   5   2   5    0.80    2.90
   5   2   5    2.20    1.50
   5   2   5    2.00    2.50
  -6  -2  -5   79.99    4.90
  -6  -2  -5   79.79    4.70
  -6  -2  -5   85.29    4.90
  -6  -2  -5   83.99    5.00
  -6  -2  -5   75.29    4.80
  -6  -2  -5   82.29    5.00
  -6  -2  -5   76.29    5.20
  -7  -2  -5    6.00    1.70
  -7  -2  -5    5.60    1.70
  -7  -2  -5    6.50    1.80
  -7  -2  -5    6.50    1.70
  -7  -2  -5    6.00    1.70
  -7   2   4   55.69    3.40
  -7   2   4   51.39    3.50
  -6   2   4   37.40    3.20
  -6   2   4   38.30    4.30
  -6   2   4   45.80    3.50
  -6   2   4   35.80    5.20
   5  -2  -4   24.00    4.50
  -5   2   4   12.40    2.20
  -5   2   4   15.60    3.60
  -5   2   4   16.70    3.70
  -5   2   4   25.60    4.60
  -4   2   4   58.69    4.80
  -4   2   4   60.99    5.00
  -4   2   4   56.79    4.80
  -4   2   4   53.79    5.00
   3  -2  -4   12.90    2.20
  -3   2   4    8.20    2.10
  -3   2   4    8.10    2.10
  -3   2   4    6.20    1.90
  -3   2   4    8.30    1.90
  -3   2   4   10.90    2.40
   2  -2  -4  420.16   14.60
  -2   2   4  407.96   14.50
  -2   2   4  415.06   15.00
  -2   2   4  413.56   14.90
  -2   2   4  403.66   14.50
   1  -2  -4  739.63   26.80
   1  -2  -4  812.82   27.00
   1  -2  -4  838.12   25.60
  -1   2   4  747.23   27.20
  -1   2   4  724.73   25.30
  -1   2   4  788.62   25.60
  -1   2   4  767.72   27.10
  -1   2   4  800.72   25.60
   0  -2  -4  183.18    7.20
   0  -2  -4  179.58    7.10
   0  -2  -4  201.68    8.90
   0  -2  -4  197.18    8.90
   0   2   4  199.18    9.10
   0   2   4  179.58    7.20
   0   2   4  203.48    9.10
   0   2   4  196.88    7.50
   0   2   4  168.18    7.00
   0   2   4  211.18    7.40
  -1  -2  -4  628.34   20.60
  -1  -2  -4  611.94   22.70
  -1  -2  -4  549.35   20.30
  -1  -2  -4  639.44   22.00
  -1  -2  -4  666.23   23.10
   1   2   4  591.54   23.90
   1   2   4  639.44   20.60
   1   2   4  619.44   22.70
   1   2   4  649.83   20.70
   1   2   4  617.14   22.20
  -2  -2  -4   40.20    3.10
  -2  -2  -4   43.30    3.20
   2   2   4   37.70    2.90
   2   2   4   42.20    3.10
  -3  -2  -4    1.90    1.40
  -3  -2  -4    5.00    1.50
   3   2   4    1.50    1.60
   3   2   4    0.30    1.50
  -4  -2  -4    2.20    2.10
  -4  -2  -4    0.60    1.20
  -4  -2  -4    0.30    1.00
  -4  -2  -4    3.20    2.10
   4   2   4    0.90    1.00
   4   2   4    3.10    2.00
   4   2   4    0.00    1.80
  -5  -2  -4   22.80    2.80
  -5  -2  -4   20.30    3.80
  -5  -2  -4   25.40    4.40
  -5  -2  -4   19.80    2.30
   5   2   4   28.90    4.40
   5   2   4   38.60    4.60
   5   2   4   26.00    2.60
  -6  -2  -4    7.00    2.30
  -6  -2  -4    4.10    1.80
  -6  -2  -4    7.60    2.00
  -6  -2  -4    9.00    2.10
  -6  -2  -4    8.30    2.20
  -6  -2  -4    9.40    2.20
  -7  -2  -4   -2.10    1.40
  -7  -2  -4   -1.80    1.40
  -7  -2  -4   -1.10    1.40
  -7  -2  -4    1.80    1.60
  -7  -2  -4    1.70    1.50
  -7   2   3   16.10    2.10
  -6   2   3  268.37   10.50
  -6   2   3  274.27   13.20
  -6   2   3  292.27   10.80
  -6   2   3  269.27   10.40
   5  -2  -3  174.28    9.90
  -5   2   3  189.58    9.70
  -5   2   3  188.88    7.80
  -5   2   3  184.38    9.70
  -5   2   3  175.38    9.60
  -5   2   3  188.68   10.00
   4  -2  -3  149.09    8.00
  -4   2   3  150.88    7.90
  -4   2   3  138.39    7.60
  -4   2   3  150.58    7.90
  -4   2   3  157.58    7.90
   3  -2  -3  203.48    7.80
  -3   2   3  189.78    8.30
  -3   2   3  182.98    8.30
  -3   2   3  193.28    8.10
  -3   2   3  181.98    8.20
  -3   2   3  176.58    7.60
   2  -2  -3  186.38    7.40
  -2   2   3  183.38    7.70
  -2   2   3  184.38    7.30
  -2   2   3  208.78    7.70
  -2   2   3  188.78    7.80
   1  -2  -3  561.04   19.00
  -1   2   3  549.45   19.10
  -1   2   3  547.85   19.20
  -1   2   3  509.85   18.30
   0  -2  -3  754.02   25.10
   0  -2  -3  762.92   26.40
   0  -2  -3  772.82   26.40
   0   2   3  788.02   26.60
   0   2   3  794.62   25.20
   0   2   3  757.92   25.10
   0   2   3  794.82   26.50
  -1  -2  -3 1100.49   35.00
  -1  -2  -3 1046.20   33.60
  -1  -2  -3 1060.59   35.30
  -1  -2  -3 1066.39   35.30
   1   2   3 1098.39   35.30
   1   2   3 1004.80   33.60
   1   2   3  990.40   34.80
   1   2   3 1007.60   33.60
   1   2   3 1098.09   35.40
   1   2   3 1050.99   35.30
  -2  -2  -3  512.45   17.30
  -2  -2  -3  502.95   17.70
  -2  -2  -3  496.75   19.30
   2   2   3  504.95   17.40
   2   2   3  543.95   17.40
   2   2   3  480.35   19.50
  -3  -2  -3   35.80    3.50
  -3  -2  -3   34.30    3.00
  -3  -2  -3   33.30    3.00
   3   2   3   29.80    3.20
   3   2   3   27.50    3.10
  -4  -2  -3 1871.61   61.79
  -4  -2  -3 1867.31   59.39
  -4  -2  -3 1824.62   59.09
  -4  -2  -3 1880.21   60.89
   4   2   3 1846.52   60.89
   4   2   3 1925.31   61.29
  -5  -2  -3   15.60    3.70
  -5  -2  -3   19.30    3.70
  -5  -2  -3   15.30    2.80
  -5  -2  -3   18.40    2.50
   5   2   3   12.00    3.20
   5   2   3   17.70    2.40
   5   2   3   17.10    3.70
  -6  -2  -3   19.60    2.70
  -6  -2  -3   18.10    2.80
  -6  -2  -3   23.10    3.10
  -6  -2  -3   18.40    2.80
  -6  -2  -3   25.20    2.90
  -6  -2  -3   24.20    2.90
  -7  -2  -3   25.00    2.70
  -7  -2  -3   19.70    3.50
  -7  -2  -3   27.20    2.90
  -7  -2  -3   27.70    3.00
  -7  -2  -3   28.40    2.70
  -7  -2  -3   27.50    2.80
  -7   2   2   15.70    2.10
  -6   2   2   -0.20    1.60
  -6   2   2   -0.60    1.40
  -6   2   2    0.30    1.50
  -6   2   2   -2.10    2.70
  -6   2   2    0.40    1.60
   5  -2  -2   57.29    7.30
  -5   2   2   64.99    3.80
  -5   2   2   59.39    5.70
  -5   2   2   86.89   10.00
  -5   2   2   62.29    3.90
  -5   2   2   64.49    5.50
  -5   2   2   67.19    5.80
   4  -2  -2  107.49    6.30
  -4   2   2   90.59    5.80
  -4   2   2   94.19    6.00
  -4   2   2   97.49    6.00
  -4   2   2  101.39    6.20
  -4   2   2  103.89    6.10
  -3   2   2   63.29    4.00
  -3   2   2   49.99    3.90
  -3   2   2   59.89    4.00
  -3   2   2   64.09    4.20
  -3   2   2   59.89    4.10
   2  -2  -2 1352.16   43.10
  -2   2   2 1351.86   43.10
  -2   2   2 1345.77   43.10
  -2   2   2 1359.76   43.30
  -2   2   2 1315.47   43.20
   1  -2  -2 3970.60  125.89
   1  -2  -2 4174.68  125.99
  -1   2   2 3977.70  125.99
  -1   2   2 3979.70  126.09
   0  -2  -2  446.66   15.10
   0  -2  -2  455.35   15.20
   0   2   2  447.96   15.10
   0   2   2  398.76   14.10
   0   2   2  396.56   14.10
   0   2   2  439.16   15.00
  -1  -2  -2 1655.13   53.19
  -1  -2  -2 1720.83   53.19
  -1  -2  -2 1632.34   53.19
   1   2   2 1714.53   53.19
   1   2   2 1730.03   53.39
   1   2   2 1663.53   53.19
   1   2   2 1483.45   52.99
  -2  -2  -2  338.77   13.90
  -2  -2  -2  341.17   12.30
  -2  -2  -2  376.46   12.80
  -2  -2  -2  355.76   12.30
   2   2   2  365.66   12.40
   2   2   2  348.97   12.40
   2   2   2  340.77   14.20
  -3  -2  -2 2850.81   91.59
  -3  -2  -2 2878.61   90.99
  -3  -2  -2 2881.11   90.89
   3   2   2 2895.51   90.89
  -4  -2  -2   14.90    1.70
  -4  -2  -2   15.20    2.60
  -4  -2  -2   13.60    1.80
  -4  -2  -2   16.80    2.80
  -4  -2  -2   12.30    2.80
   4   2   2   14.90    2.70
   4   2   2   11.70    2.40
  -5  -2  -2   46.30    5.00
  -5  -2  -2   54.29    3.70
  -5  -2  -2   56.19    5.10
  -5  -2  -2   52.89    6.20
   5   2   2   48.00    5.20
   5   2   2   54.09    5.20
  -6  -2  -2   24.10    3.00
  -6  -2  -2   28.70    3.10
  -6  -2  -2   32.90    3.70
  -6  -2  -2   23.70    3.00
  -6  -2  -2   33.10    3.40
  -6  -2  -2   26.80    3.20
  -7  -2  -2   23.50    2.60
  -7  -2  -2   25.50    2.90
  -7  -2  -2   19.20    2.40
  -7  -2  -2   19.60    2.50
  -7  -2  -2   22.40    2.70
  -8   2   1    3.80    1.30
  -7   2   1   27.90    2.80
  -7   2   1   26.20    2.80
  -6   2   1    1.50    1.70
  -6   2   1    0.10    1.50
  -6   2   1   -2.60    2.60
  -6   2   1    1.30    1.70
  -6   2   1   -0.90    1.40
  -5   2   1  127.49    8.30
  -5   2   1  139.99    6.00
  -5   2   1  136.99    8.30
  -5   2   1  126.69    6.20
  -5   2   1  136.59    8.00
  -5   2   1  134.89    8.00
   4  -2  -1  143.69    7.30
  -4   2   1  138.09    7.50
  -4   2   1  131.59    6.80
  -4   2   1  119.79    6.80
  -4   2   1  121.19    7.00
  -4   2   1  138.59    6.90
  -4   2   1  145.49    7.40
   3  -2  -1  251.27   11.40
   3  -2  -1  271.37   10.40
  -3   2   1  270.97   10.40
  -3   2   1  266.57   10.30
  -3   2   1  261.17   10.30
  -3   2   1  264.77   10.50
  -3   2   1  250.37   10.10
  -3   2   1  244.68   11.10
   2  -2  -1 2952.10   89.79
  -2   2   1 2865.31   89.09
  -2   2   1 2885.91   89.09
  -2   2   1 2922.11   89.69
  -2   2   1 2589.44   89.09
  -2   2   1 2872.21   89.19
  -2   2   1 2677.13   89.49
  -2   2   1 2944.81   89.69
   1  -2  -1  404.26   13.50
   1  -2  -1  377.66   13.80
   1  -2  -1  429.16   14.00
  -1   2   1  389.86   14.00
  -1   2   1  421.96   13.60
  -1   2   1  408.86   14.00
   0  -2  -1   89.99    3.60
   0  -2  -1   92.09    4.00
   0   2   1   93.69    4.00
   0   2   1   94.59    4.00
   0   2   1   87.39    3.50
  -1  -2  -1  210.98    7.90
  -1  -2  -1  227.18    8.40
  -1  -2  -1  195.38    8.60
   1   2   1  215.78    8.40
   1   2   1  223.08    7.90
   1   2   1  205.38    7.80
  -2  -2  -1  242.88    9.90
  -2  -2  -1  228.58    8.70
  -2  -2  -1  207.78    8.20
  -2  -2  -1  239.68    8.40
   2   2   1  214.48    8.30
   2   2   1  233.58   10.10
  -3  -2  -1  285.77   10.90
  -3  -2  -1  289.27   10.90
  -3  -2  -1  290.37   11.40
   3   2   1  290.07   10.90
  -4  -2  -1   19.80    2.90
  -4  -2  -1   16.50    3.20
  -4  -2  -1   13.80    2.50
  -4  -2  -1   17.20    2.00
   4   2   1   16.10    2.70
  -5  -2  -1   26.50    2.70
  -5  -2  -1   19.00    3.40
  -5  -2  -1   26.50    4.00
  -5  -2  -1   30.10    4.60
   5   2   1   29.50    4.20
   5   2   1   26.20    4.00
  -6  -2  -1   11.70    2.40
  -6  -2  -1   11.90    2.30
  -6  -2  -1    9.40    2.20
  -6  -2  -1   10.70    2.30
  -7  -2  -1    5.90    1.80
  -7  -2  -1    5.60    2.00
  -7  -2  -1    8.00    1.90
  -8   2   0   54.89    3.00
  -8   2   0   59.49    3.00
  -7   2   0    7.90    1.90
  -7   2   0    1.90    1.60
  -7   2   0    1.60    1.90
  -7   2   0    2.80    1.70
  -6   2   0   62.09    4.40
  -6   2   0   57.49    4.30
  -6   2   0   63.79    4.30
  -6   2   0   63.29    4.60
   5  -2   0   33.20    4.90
  -5   2   0   23.00    2.60
  -5   2   0   30.10    4.50
  -5   2   0   25.40    3.00
  -5   2   0   31.40    4.40
  -5   2   0   26.50    4.30
  -5   2   0   31.30    4.80
   4  -2   0   16.60    2.90
  -4   2   0   18.90    3.10
  -4   2   0   15.50    2.80
  -4   2   0   17.60    3.10
  -4   2   0   16.00    3.00
  -4   2   0   22.70    3.30
  -4   2   0   15.20    2.00
   3  -2   0   40.00    3.20
  -3   2   0   38.50    3.40
  -3   2   0   37.00    3.00
  -3   2   0   42.00    3.50
  -3   2   0   43.80    3.40
  -3   2   0   34.00    3.20
   2  -2   0  584.44   19.90
   2  -2   0  562.94   20.80
  -2   2   0  613.04   20.20
  -2   2   0  602.44   20.60
  -2   2   0  634.34   20.00
  -2   2   0  531.45   19.70
  -2   2   0  639.74   21.00
  -2   2   0  604.54   20.00
   1  -2   0  153.48    6.00
   1  -2   0  143.69    6.00
   1  -2   0  145.29    5.90
  -1   2   0  149.49    6.10
  -1   2   0  144.79    6.00
  -1   2   0  156.98    6.00
   0  -2   0 6462.25  204.58
   0  -2   0 6536.05  204.68
   0  -2   0 6579.44  204.88
   0   2   0 6381.46  204.58
   0   2   0 6578.14  204.98
   0   2   0 6562.04  204.58
   1   2   0  134.59    5.60
   1   2   0  138.79    5.70
  -2  -2   0  528.45   19.30
  -2  -2   0  574.24   19.70
  -2  -2   0  630.84   20.90
   2   2   0  622.14   21.10
  -3  -2   0   43.50    3.10
  -3  -2   0   44.70    3.40
  -3  -2   0   40.40    3.10
  -4  -2   0   17.90    2.70
  -4  -2   0   16.70    2.70
  -4  -2   0   20.70    3.20
   4   2   0   16.10    2.80
  -5  -2   0   19.70    3.40
  -5  -2   0   22.30    4.10
  -5  -2   0   23.90    2.60
  -6  -2   0   55.79    4.10
  -8   2  -1   43.70    2.60
  -8   2  -1   43.30    2.60
  -8   2  -1   41.20    2.80
  -7   2  -1    5.70    1.70
  -7   2  -1    4.90    2.00
  -7   2  -1    7.90    2.00
  -7   2  -1    4.80    1.80
  -6   2  -1    8.90    2.20
  -6   2  -1   12.80    2.50
  -6   2  -1    7.80    2.20
  -6   2  -1   14.70    2.40
  -6   2  -1   13.20    2.70
   5  -2   1   25.40    3.90
  -5   2  -1   27.50    4.20
  -5   2  -1   27.20    4.20
  -5   2  -1   26.00    2.70
  -5   2  -1   31.80    4.90
  -5   2  -1   27.30    3.10
  -5   2  -1   25.00    4.20
   4  -2   1   12.50    2.90
  -4   2  -1   13.80    2.90
  -4   2  -1   16.80    3.00
  -4   2  -1   16.50    2.00
  -4   2  -1   15.10    3.00
  -4   2  -1   15.60    2.90
   3  -2   1  291.97   11.00
  -3   2  -1  291.07   11.30
  -3   2  -1  280.57   11.10
  -3   2  -1  292.17   11.30
   2  -2   1  222.68    9.00
   2  -2   1  235.38    9.10
   2  -2   1  221.88    8.50
  -2   2  -1  213.18    9.30
  -2   2  -1  238.88   10.00
  -2   2  -1  247.28    8.70
  -2   2  -1  226.38    8.90
  -2   2  -1  226.18    9.50
  -2   2  -1  230.58    8.60
   1  -2   1  226.18    8.70
   1  -2   1  226.68    8.60
   1  -2   1  219.88    8.60
  -1   2  -1  226.58    8.70
  -1   2  -1  226.78    8.70
  -1   2  -1  214.08    8.70
   0  -2   1   98.09    4.00
   0  -2   1   98.29    4.20
   0  -2   1   97.99    4.20
   0   2  -1  102.89    4.00
   0   2  -1   97.39    4.20
   0   2  -1   98.19    4.20
  -1  -2   1  402.56   13.80
   1   2  -1  388.06   13.60
   1   2  -1  403.46   13.70
  -2  -2   1 2440.96   83.19
   2   2  -1 2713.63   84.19
   2   2  -1 2779.32   84.19
  -3  -2   1  234.28    9.20
  -3  -2   1  237.48    9.40
  -3  -2   1  259.17    9.60
  -3  -2   1  252.77    9.50
  -3  -2   1  247.98    9.70
  -4  -2   1  128.89    6.60
  -4  -2   1  124.69    6.40
  -4  -2   1  126.39    6.80
  -5  -2   1  122.59    7.70
  -5  -2   1  119.19    8.00
  -8   2  -2   46.60    2.60
  -8   2  -2   45.70    2.70
  -7   2  -2   18.30    2.50
  -7   2  -2   21.10    2.70
  -7   2  -2   21.70    2.50
  -7   2  -2   22.10    2.60
  -7   2  -2   22.70    2.60
  -6   2  -2   39.80    3.70
  -6   2  -2   32.00    3.60
  -6   2  -2   27.20    3.10
  -6   2  -2   28.20    3.20
  -6   2  -2   27.40    3.30
   5  -2   2   60.79    5.30
  -5   2  -2   62.29    5.30
  -5   2  -2   54.99    3.90
  -5   2  -2   47.60    5.80
  -5   2  -2   51.19    3.90
  -5   2  -2   60.49    5.80
  -5   2  -2   56.69    6.00
   4  -2   2   15.20    3.00
  -4   2  -2   16.50    2.00
  -4   2  -2   14.60    3.00
  -4   2  -2   12.80    3.10
  -4   2  -2   16.40    3.00
  -4   2  -2   13.90    2.70
   3  -2   2 3209.98   96.99
   3  -2   2 2952.80   97.39
  -3   2  -2 3012.40   96.79
  -3   2  -2 3117.69   96.79
  -3   2  -2 3004.60   96.99
  -3   2  -2 3039.50   97.39
   2  -2   2  357.66   12.40
   2  -2   2  356.06   12.70
   2  -2   2  315.87   14.40
  -2   2  -2  367.56   12.70
  -2   2  -2  367.16   13.00
  -2   2  -2  368.26   12.60
  -2   2  -2  360.26   14.30
   1  -2   2 1719.73   54.39
   1  -2   2 1704.83   54.49
   1  -2   2 1669.23   54.39
  -1   2  -2 1680.93   54.49
  -1   2  -2 1606.44   54.39
  -1   2  -2 1751.72   54.39
   0  -2   2  440.96   15.30
   0  -2   2  434.36   15.20
   0  -2   2  439.26   14.80
   0   2  -2  438.96   15.20
   0   2  -2  438.86   15.20
   0   2  -2  427.96   14.70
  -1  -2   2 3920.51  121.19
  -1  -2   2 3944.41  121.29
   1   2  -2 3794.12  121.19
  -2  -2   2 1319.07   42.60
  -2  -2   2 1307.97   42.40
   2   2  -2 1359.56   43.30
   2   2  -2 1331.87   43.20
  -3  -2   2   63.69    3.80
  -3  -2   2   56.69    3.60
  -3  -2   2   61.69    3.70
  -3  -2   2   57.49    3.70
  -3  -2   2   62.29    4.00
  -4  -2   2   96.39    6.20
  -4  -2   2  100.29    5.60
  -8   2  -3   58.99    3.90
  -8   2  -3   61.19    3.00
  -7   2  -3   28.10    3.00
  -7   2  -3   34.10    3.30
  -7   2  -3   25.20    2.70
  -7   2  -3   19.20    2.50
  -7   2  -3   25.60    2.70
  -6   2  -3   19.40    2.90
  -6   2  -3   16.00    3.20
  -6   2  -3   19.30    2.70
  -6   2  -3   24.00    3.00
  -6   2  -3   27.20    3.40
  -6   2  -3   23.80    3.00
   5  -2   3   19.80    3.80
   5  -2   3   21.10    3.90
  -5   2  -3   12.20    2.20
  -5   2  -3   14.60    3.20
  -5   2  -3   14.20    3.90
  -5   2  -3   25.30    4.70
  -5   2  -3   15.90    3.80
   4  -2   3 1921.61   62.39
  -4   2  -3 1935.91   63.29
  -4   2  -3 1880.61   62.59
  -4   2  -3 1862.91   60.39
  -4   2  -3 1947.81   62.39
  -4   2  -3 1879.41   62.19
   3  -2   3   33.00    3.40
  -3   2  -3   33.50    3.60
  -3   2  -3   26.10    3.10
  -3   2  -3   24.80    3.30
  -3   2  -3   30.50    3.30
   2  -2   3  508.95   17.90
   2  -2   3  560.54   17.70
  -2   2  -3  521.55   17.90
  -2   2  -3  517.85   18.40
  -2   2  -3  519.65   17.90
  -2   2  -3  521.45   20.20
   1  -2   3 1066.99   34.70
   1  -2   3 1126.39   36.60
   1  -2   3  992.70   35.90
   1  -2   3 1099.49   36.50
  -1   2  -3 1130.19   36.20
  -1   2  -3 1072.39   36.60
  -1   2  -3 1104.49   36.50
   0  -2   3  818.42   27.40
   0  -2   3  774.12   27.10
   0   2  -3  814.42   26.50
   0   2  -3  796.52   27.20
   0   2  -3  797.02   27.20
  -1  -2   3  523.85   17.50
  -1  -2   3  524.45   17.60
  -1  -2   3  521.35   18.10
  -1  -2   3  455.35   17.60
   1   2  -3  528.55   17.90
   1   2  -3  532.65   17.90
   1   2  -3  549.85   17.50
  -2  -2   3  173.38    7.80
  -2  -2   3  163.08    7.00
  -2  -2   3  182.68    7.20
  -2  -2   3  193.68    7.50
   2   2  -3  182.48    7.40
   2   2  -3  192.18    7.70
  -3  -2   3  175.38    7.60
  -3  -2   3  186.48    7.60
  -3  -2   3  175.18    7.60
  -3  -2   3  178.88    7.90
  -4  -2   3  142.19    7.30
  -4  -2   3  134.79    7.10
  -7   2  -4    0.90    1.60
  -7   2  -4    0.10    1.50
  -7   2  -4   -1.90    1.40
  -7   2  -4    3.60    1.50
  -6   2  -4    7.20    2.00
  -6   2  -4    5.90    2.00
  -6   2  -4   11.10    2.30
  -6   2  -4    5.80    2.20
  -6   2  -4    6.70    2.00
  -6   2  -4    6.70    1.90
   5  -2   4   28.40    4.60
   5  -2   4   26.50    4.50
  -5   2  -4   25.10    2.90
  -5   2  -4   31.80    4.90
  -5   2  -4   35.90    4.80
   4  -2   4   -0.50    1.80
   4  -2   4    1.40    1.70
  -4   2  -4    4.80    2.30
  -4   2  -4   -0.10    2.10
  -4   2  -4    2.10    2.10
  -4   2  -4    0.40    1.20
  -4   2  -4    1.60    1.70
   3  -2   4    1.00    1.40
  -3   2  -4    2.40    1.50
  -3   2  -4    4.10    1.80
  -3   2  -4    1.70    1.70
  -3   2  -4    0.90    1.40
   2  -2   4   40.60    3.10
  -2   2  -4   42.00    3.40
  -2   2  -4   44.60    3.40
  -2   2  -4   45.20    3.10
   1  -2   4  629.14   23.60
   1  -2   4  568.24   21.00
   1  -2   4  648.74   21.30
   1  -2   4  675.73   23.90
   1  -2   4  656.23   21.20
  -1   2  -4  660.53   23.90
  -1   2  -4  627.94   23.60
  -1   2  -4  672.53   23.10
  -1   2  -4  672.73   21.10
   0  -2   4  197.08    9.20
   0  -2   4  198.88    8.10
   0  -2   4  201.38    9.30
   0  -2   4  177.78    7.40
   0   2  -4  202.88    9.10
   0   2  -4  197.88    8.10
   0   2  -4  213.58    9.30
  -1  -2   4  803.12   25.40
  -1  -2   4  793.62   25.20
  -1  -2   4  709.93   26.50
   1   2  -4  758.82   25.20
   1   2  -4  746.43   26.20
   1   2  -4  793.32   26.30
  -2  -2   4  397.96   14.30
  -2  -2   4  400.86   13.90
  -2  -2   4  379.76   13.90
  -3  -2   4   11.50    2.10
  -3  -2   4   11.90    2.20
  -3  -2   4    9.80    2.20
  -3  -2   4    7.30    2.00
  -4  -2   4   55.29    4.30
  -4  -2   4   54.69    3.40
  -4  -2   4   45.60    4.20
  -4  -2   4   51.89    4.70
   4   2  -4   55.69    4.50
  -7   2  -5    6.90    1.70
  -7   2  -5    3.80    1.70
  -7   2  -5    2.30    1.50
  -7   2  -5    4.40    1.50
  -7   2  -5    5.20    1.70
  -6   2  -5   79.39    4.80
  -6   2  -5   72.79    5.00
  -6   2  -5   84.79    5.00
  -6   2  -5   83.89    5.00
  -6   2  -5   83.29    5.00
  -6   2  -5   85.99    4.90
   5  -2   5   -0.80    2.50
   5  -2   5    2.80    3.00
  -5   2  -5   -0.90    1.40
  -5   2  -5    0.20    2.80
  -5   2  -5    4.60    2.70
   4  -2   5   12.10    2.90
   4  -2   5   14.70    3.00
   4  -2   5    6.20    1.50
  -4   2  -5   13.80    3.20
  -4   2  -5   10.10    3.20
  -4   2  -5    7.60    1.50
  -4   2  -5   15.60    3.10
  -4   2  -5   11.00    2.10
   3  -2   5   19.30    2.90
   3  -2   5   21.50    2.20
   3  -2   5   21.80    3.10
  -3   2  -5   18.70    3.20
  -3   2  -5   19.20    3.10
  -3   2  -5   21.10    2.90
  -3   2  -5   21.60    3.30
  -3   2  -5   22.00    2.10
   2  -2   5   48.80    3.60
   2  -2   5   45.00    3.40
  -2   2  -5   51.89    3.80
  -2   2  -5   47.10    3.30
  -2   2  -5   54.89    4.00
   1  -2   5  115.99    7.50
   1  -2   5  125.49    5.40
   1  -2   5  128.39    5.70
   1  -2   5  141.79    5.60
  -1   2  -5  141.89    5.70
  -1   2  -5  127.09    7.00
  -1   2  -5  130.39    8.00
  -1   2  -5  125.29    5.30
   0  -2   5  487.05   15.90
   0  -2   5  420.66   16.70
   0  -2   5  495.75   18.90
   0  -2   5  473.95   16.00
   0  -2   5  468.45   16.10
   0   2  -5  469.15   16.00
   0   2  -5  456.85   18.30
   0   2  -5  478.85   16.90
  -1  -2   5  138.99    5.90
  -1  -2   5  141.19    6.20
  -1  -2   5  133.59    5.90
   1   2  -5  137.99    6.10
  -2  -2   5    1.60    1.40
  -2  -2   5    0.30    1.20
  -2  -2   5    1.50    1.30
  -2  -2   5    2.20    1.30
   2   2  -5    0.10    1.40
   2   2  -5   -0.40    1.20
  -3  -2   5   31.10    3.40
  -3  -2   5   40.70    3.50
  -3  -2   5   37.20    3.80
  -3  -2   5   35.10    3.50
   3   2  -5   38.30    3.60
  -4  -2   5   23.70    3.80
  -4  -2   5   21.10    3.20
  -4  -2   5   25.90    2.70
  -4  -2   5   21.20    3.20
   4   2  -5   17.80    3.20
  -5  -2   5   56.09    6.30
  -7   2  -6    2.60    1.40
  -7   2  -6    0.30    1.30
  -7   2  -6    0.20    1.20
  -7   2  -6    0.70    1.30
  -7   2  -6   -0.10    1.40
  -6   2  -6    5.90    1.90
  -6   2  -6    4.80    1.80
  -6   2  -6    4.40    1.80
  -6   2  -6    1.70    1.60
  -6   2  -6    2.70    1.70
  -6   2  -6    6.20    2.10
  -5   2  -6   26.90    3.10
  -5   2  -6   20.80    2.90
  -5   2  -6   25.60    3.40
  -5   2  -6   16.20    2.50
  -5   2  -6   23.50    2.90
  -5   2  -6   32.60    3.20
   4  -2   6  188.88    7.80
   4  -2   6  193.28    9.90
   4  -2   6  205.98    9.90
  -4   2  -6  194.48   10.60
  -4   2  -6  193.18    7.80
  -4   2  -6  193.08    7.90
  -4   2  -6  189.68   10.30
  -4   2  -6  198.08    9.60
   3  -2   6    9.30    2.40
   3  -2   6   12.90    2.70
   3  -2   6   11.60    1.60
  -3   2  -6   12.40    1.70
  -3   2  -6   12.10    2.90
  -3   2  -6   12.20    3.10
  -3   2  -6    9.00    1.50
  -3   2  -6   10.60    2.40
   2  -2   6  329.27   12.80
   2  -2   6  314.77   12.40
  -2   2  -6  323.07   13.10
  -2   2  -6  340.57   12.90
  -2   2  -6  351.86   12.50
   1  -2   6  775.52   27.00
   1  -2   6  830.72   26.90
  -1   2  -6  819.72   27.30
   0  -2   6    3.10    1.40
   0  -2   6    3.00    1.30
   0  -2   6    4.90    1.50
   0   2  -6    1.70    1.20
   0   2  -6    4.60    1.30
  -1  -2   6  288.97   11.20
  -1  -2   6  289.67   11.00
  -1  -2   6  280.57   10.90
  -1  -2   6  284.67   10.90
   1   2  -6  294.57   10.90
   1   2  -6  293.37   11.10
  -2  -2   6   70.39    4.40
  -2  -2   6   66.19    4.40
  -2  -2   6   75.59    4.60
  -2  -2   6   76.19    4.90
   2   2  -6   67.39    4.60
   2   2  -6   67.69    4.40
  -3  -2   6  418.06   16.10
  -3  -2   6  417.46   15.90
  -3  -2   6  442.96   15.00
  -3  -2   6  421.26   16.70
   3   2  -6  412.56   16.00
   3   2  -6  429.36   16.40
  -4  -2   6   83.99    6.70
  -4  -2   6   88.49    4.80
  -4  -2   6   86.09    6.10
  -4  -2   6   93.89    6.20
   4   2  -6   86.09    6.00
   4   2  -6   94.29    6.30
  -5  -2   6   96.99    5.10
  -5  -2   6   87.79    7.80
  -5  -2   6  112.09    7.20
  -5  -2   6  104.59    5.50
   5   2  -6  115.69    7.40
   7  -2   7    4.80    1.40
  -7   2  -7    3.80    1.30
  -7   2  -7    4.70    1.40
  -7   2  -7    4.70    1.40
  -7   2  -7    4.20    1.30
  -7   2  -7    6.50    1.40
  -6   2  -7   26.20    2.80
  -6   2  -7   34.40    3.30
  -6   2  -7   31.20    3.20
  -6   2  -7   25.20    2.80
  -6   2  -7   45.40    3.50
  -6   2  -7   32.70    3.20
   5  -2   7   12.60    2.20
  -5   2  -7    8.10    2.10
  -5   2  -7   11.60    2.20
  -5   2  -7   13.00    2.30
  -5   2  -7   10.30    2.20
  -5   2  -7    8.30    2.20
  -5   2  -7   11.40    2.30
  -5   2  -7   11.30    2.40
   4  -2   7    2.40    1.50
   4  -2   7    5.10    2.50
   4  -2   7    1.20    2.60
  -4   2  -7   -0.90    2.90
  -4   2  -7    5.70    1.70
  -4   2  -7    2.10    2.40
  -4   2  -7    1.70    2.70
   3  -2   7    8.60    2.40
   3  -2   7    7.40    2.40
   3  -2   7    7.00    1.60
  -3   2  -7    3.70    2.50
  -3   2  -7    7.10    2.70
  -3   2  -7    3.40    2.10
   2  -2   7    0.60    1.80
   2  -2   7    0.10    1.00
   2  -2   7    2.30    1.70
  -2   2  -7    0.60    1.70
  -2   2  -7    2.00    1.80
   1  -2   7   34.20    3.20
  -1   2  -7   37.60    3.60
   0  -2   7 1131.39   37.50
   0  -2   7 1194.98   37.70
   0   2  -7 1151.48   37.60
   0   2  -7 1083.19   37.20
  -1  -2   7   41.80    3.50
  -1  -2   7   45.70    3.40
  -1  -2   7   35.10    3.40
   1   2  -7   48.60    3.60
   1   2  -7   35.50    3.30
  -2  -2   7 2222.98   71.59
  -2  -2   7 2151.48   71.49
  -2  -2   7 2214.68   71.29
  -2  -2   7 2224.88   71.99
   2   2  -7 2190.48   71.69
   2   2  -7 2328.77   71.49
  -3  -2   7    0.50    1.90
  -3  -2   7    2.60    1.80
  -3  -2   7    3.10    1.40
  -3  -2   7    4.50    2.00
   3   2  -7    2.80    1.80
   3   2  -7    4.30    2.00
  -4  -2   7   83.79    6.10
  -4  -2   7   85.99    7.10
  -4  -2   7   83.89    4.50
  -4  -2   7   94.69    5.10
  -4  -2   7   82.79    6.10
   4   2  -7   85.89    6.30
   4   2  -7   83.29    6.10
  -5  -2   7    3.70    2.60
  -5  -2   7   -3.60    1.60
  -5  -2   7    2.50    2.50
  -5  -2   7    0.70    2.20
  -5  -2   7   -1.50    3.10
  -5  -2   7   -0.20    1.30
  -5  -2   7   -0.50    1.50
  -5  -2   7    0.00    1.80
   5   2  -7    5.90    2.90
  -6  -2   7   97.39    5.20
  -6  -2   7   95.39    5.20
  -7   2  -8   19.50    1.90
   6  -2   8   -1.30    1.60
  -6   2  -8    1.10    1.40
  -6   2  -8    2.10    1.40
  -6   2  -8    3.40    1.50
  -6   2  -8    0.00    1.30
  -6   2  -8    0.60    1.30
  -6   2  -8    1.70    1.50
   5  -2   8    0.50    1.50
   5  -2   8    0.90    1.50
  -5   2  -8    1.10    1.70
  -5   2  -8    1.30    1.60
  -5   2  -8    0.90    1.70
  -5   2  -8    1.00    1.60
  -5   2  -8    1.20    1.70
  -5   2  -8    0.50    1.50
  -5   2  -8    0.10    1.60
   4  -2   8   19.90    4.60
   4  -2   8   16.50    3.90
   4  -2   8   20.10    2.60
  -4   2  -8   21.50    2.90
  -4   2  -8   19.60    2.80
  -4   2  -8   20.00    2.80
   3  -2   8 1126.39   36.30
   3  -2   8 1102.59   38.60
  -3   2  -8 1096.59   36.70
  -3   2  -8 1146.29   39.50
   2  -2   8   55.39    3.40
   2  -2   8   62.79    4.90
  -2   2  -8   60.39    5.10
   1  -2   8  467.55   16.10
   1  -2   8  475.15   17.80
  -1   2  -8  496.05   17.90
   0  -2   8  169.88    8.10
   0  -2   8  185.38    8.30
   0   2  -8  171.68    8.40
   0   2  -8  178.58    8.20
  -1  -2   8  848.52   29.60
  -1  -2   8  846.62   29.80
  -1  -2   8  871.21   29.40
   1   2  -8  882.51   29.40
   1   2  -8  847.92   29.50
  -2  -2   8  171.48    8.90
  -2  -2   8  177.48    9.20
  -2  -2   8  194.08    8.80
  -2  -2   8  190.98    8.90
  -2  -2   8  196.78    7.70
   2   2  -8  185.18    9.00
   2   2  -8  180.38    8.60
  -3  -2   8   96.39    6.90
  -3  -2   8   95.99    6.30
  -3  -2   8   94.19    6.40
  -3  -2   8   99.49    5.20
   3   2  -8   97.59    6.30
   3   2  -8   96.09    6.50
  -4  -2   8    0.50    2.40
  -4  -2   8   -1.30    2.40
  -4  -2   8    0.10    1.60
  -4  -2   8   -3.30    2.40
  -4  -2   8    0.20    1.30
   4   2  -8    1.20    2.30
   4   2  -8    1.30    2.20
  -5  -2   8   53.99    4.40
  -5  -2   8   63.69    4.60
  -5  -2   8   57.69    3.80
  -5  -2   8   59.09    6.10
  -5  -2   8   67.79    4.50
  -5  -2   8   60.89    4.00
  -5  -2   8   65.29    5.10
  -5  -2   8   61.49    4.50
   5   2  -8   70.79    6.10
  -6  -2   8   -0.20    1.50
  -6  -2   8    0.40    1.70
  -6  -2   8    5.10    1.80
   6  -2   9   51.29    3.40
   6  -2   9   41.80    3.20
  -6   2  -9   51.79    3.30
  -6   2  -9   45.40    3.10
  -6   2  -9   48.50    3.20
  -6   2  -9   45.50    3.20
   5  -2   9   22.10    2.60
   5  -2   9   18.40    2.50
  -5   2  -9   22.80    2.70
  -5   2  -9   22.90    2.60
  -5   2  -9   18.50    2.50
  -5   2  -9   22.20    2.60
  -5   2  -9   18.70    2.40
   4  -2   9   48.60    3.60
   4  -2   9   43.10    3.70
  -4   2  -9   46.40    4.00
  -4   2  -9   47.80    4.00
  -4   2  -9   40.40    3.60
   3  -2   9    5.60    2.70
   3  -2   9   -0.40    1.40
  -3   2  -9    2.30    2.90
  -3   2  -9    2.40    1.60
   2  -2   9    1.30    2.10
   2  -2   9    0.30    1.20
  -2   2  -9    0.00    1.40
  -2   2  -9    1.00    2.30
   1  -2   9    0.50    2.00
   1  -2   9    3.30    1.20
  -1   2  -9    6.50    2.40
   0  -2   9  230.88   10.00
   0  -2   9  215.48    8.20
   0   2  -9  207.18    9.70
  -1  -2   9   99.89    6.50
  -1  -2   9  107.89    6.50
   1   2  -9  108.29    6.30
   1   2  -9  110.29    6.20
  -2  -2   9  123.09    7.70
  -2  -2   9  125.59    5.90
   2   2  -9  124.19    7.10
   2   2  -9  132.39    7.50
  -3  -2   9   65.19    4.00
  -3  -2   9   60.09    6.90
  -3  -2   9   58.99    5.80
  -3  -2   9   62.69    4.30
  -3  -2   9   61.29    5.50
   3   2  -9   63.09    5.60
   3   2  -9   72.99    5.60
  -4  -2   9   11.80    2.40
  -4  -2   9   11.30    2.00
  -4  -2   9    9.90    3.60
  -4  -2   9   14.50    3.50
   4   2  -9   11.60    3.30
   4   2  -9   13.60    3.30
  -5  -2   9    9.00    2.40
  -5  -2   9    8.80    2.20
  -5  -2   9    4.50    3.10
  -5  -2   9    8.80    2.40
  -5  -2   9    9.10    2.00
  -5  -2   9    5.30    2.40
  -5  -2   9    9.60    2.00
  -5  -2   9    8.50    1.80
   5   2  -9    8.50    3.10
  -6  -2   9   95.69    4.80
  -6  -2   9   92.29    4.90
  -6  -2   9   94.89    5.00
  -6  -2   9   90.39    5.00
  -6  -2   9   90.59    4.30
  -7  -2   9   10.40    1.50
   6  -2  10    1.00    1.30
   6  -2  10    2.20    1.30
  -6   2 -10    2.10    1.20
  -6   2 -10    1.90    1.30
  -6   2 -10    1.20    1.10
  -6   2 -10    2.00    1.20
   5  -2  10    3.10    1.80
  -5   2 -10    2.90    1.50
  -5   2 -10    2.90    1.50
  -5   2 -10    1.50    1.40
   4  -2  10   22.20    2.70
   4  -2  10   19.90    2.70
  -4   2 -10   18.10    2.50
  -4   2 -10   20.40    2.70
  -4   2 -10   17.90    2.50
   3  -2  10   -2.10    1.50
   3  -2  10    1.10    1.70
   3  -2  10    1.90    1.60
  -3   2 -10    2.60    1.60
  -3   2 -10    0.10    1.60
  -3   2 -10    5.50    3.30
  -3   2 -10   -1.20    1.60
   2  -2  10   13.40    3.40
   2  -2  10   21.90    2.70
  -2   2 -10   21.00    4.30
  -2   2 -10   18.80    2.60
   1  -2  10   18.30    2.10
   1  -2  10   11.60    3.30
  -1   2 -10   13.80    3.10
  -1   2 -10   11.00    1.90
   0  -2  10   11.50    2.90
   0  -2  10   11.80    1.80
   0   2 -10   16.10    3.10
  -1  -2  10    7.70    1.60
  -1  -2  10    4.00    2.60
  -1  -2  10    7.80    2.80
   1   2 -10    8.40    2.60
   1   2 -10    6.00    2.60
   1   2 -10    6.90    1.60
  -2  -2  10   32.70    2.80
  -2  -2  10   30.90    3.10
  -2  -2  10   37.10    5.20
   2   2 -10   33.10    4.10
   2   2 -10   33.50    4.70
   2   2 -10   31.60    2.80
  -3  -2  10   18.40    4.30
  -3  -2  10   32.10    3.00
  -3  -2  10   29.10    3.40
   3   2 -10   26.50    4.30
   3   2 -10   32.40    4.40
  -4  -2  10   46.80    5.50
  -4  -2  10   39.70    3.80
  -4  -2  10   44.30    3.90
  -4  -2  10   37.30    3.30
  -4  -2  10   40.40    4.00
  -4  -2  10   33.00    4.00
  -4  -2  10   38.80    3.70
  -4  -2  10   36.20    3.60
  -4  -2  10   34.10    3.00
   4   2 -10   38.00    5.10
  -5  -2  10    5.10    1.60
  -5  -2  10    7.80    2.40
  -5  -2  10    4.00    2.00
  -5  -2  10    5.40    1.90
  -5  -2  10    4.90    1.90
  -5  -2  10    4.30    2.10
  -5  -2  10    4.00    1.60
  -6  -2  10  217.58    8.30
  -6  -2  10  206.48    8.30
  -6  -2  10  193.48    7.80
  -6  -2  10  222.88    8.40
  -6  -2  10  211.28    7.70
   5  -2  11   -0.40    1.40
   5  -2  11    1.80    1.50
  -5   2 -11    0.70    1.20
  -5   2 -11    0.30    1.30
  -5   2 -11   -0.40    1.40
  -5   2 -11    0.50    1.20
   4  -2  11   18.70    2.40
   4  -2  11   21.20    2.70
  -4   2 -11   18.90    2.40
  -4   2 -11   20.40    2.60
  -4   2 -11   20.80    2.50
  -4   2 -11   19.30    2.30
   3  -2  11    5.80    1.70
   3  -2  11    4.20    1.70
   3  -2  11    3.80    1.80
  -3   2 -11    5.20    1.70
  -3   2 -11    5.50    1.90
  -3   2 -11    2.10    1.50
   2  -2  11   57.89    3.90
   2  -2  11   53.19    4.10
   2  -2  11   52.19    4.10
  -2   2 -11   57.39    4.10
  -2   2 -11   52.39    3.80
  -2   2 -11   58.99    3.60
  -2   2 -11   56.79    4.20
  -2   2 -11   62.99    6.20
   1  -2  11  314.87   14.30
   1  -2  11  330.97   12.00
  -1   2 -11  323.57   14.50
  -1   2 -11  318.47   12.00
   0  -2  11   49.60    3.60
   0  -2  11   49.10    3.60
   0  -2  11   57.19    6.00
   0   2 -11   61.19    3.80
   0   2 -11   62.39    5.60
  -1  -2  11   42.90    3.30
   1   2 -11   40.90    5.60
   1   2 -11   45.60    3.30
   1   2 -11   52.49    5.60
  -2  -2  11   71.59    4.70
  -2  -2  11   79.39    4.40
  -2  -2  11   66.89    6.60
   2   2 -11   89.09    6.20
   2   2 -11   75.49    6.40
   2   2 -11   81.59    4.40
  -3  -2  11   37.30    4.00
  -3  -2  11   34.90    3.10
  -3  -2  11   33.10    3.70
  -3  -2  11   31.30    3.60
  -3  -2  11   32.50    3.30
  -3  -2  11   35.10    3.70
  -3  -2  11   31.10    2.90
  -3  -2  11   38.90    3.60
   3   2 -11   41.20    5.10
   3   2 -11   32.30    3.10
  -4  -2  11   17.40    2.80
  -4  -2  11   18.20    2.20
  -4  -2  11   25.60    3.10
  -4  -2  11   24.10    2.60
  -4  -2  11   20.10    2.80
  -4  -2  11   18.40    3.10
  -4  -2  11   23.00    2.90
  -4  -2  11   19.60    2.60
   4   2 -11   23.60    4.20
  -5  -2  11   82.39    5.00
  -5  -2  11   83.59    5.20
  -5  -2  11   84.99    4.40
  -5  -2  11   94.19    5.00
  -5  -2  11   87.09    4.90
  -5  -2  11   85.19    4.30
  -5  -2  11   96.69    4.90
   5   2 -11   78.89    4.30
  -6  -2  11   24.90    2.50
  -6  -2  11   31.70    2.20
  -6  -2  11   26.20    2.70
  -6  -2  11   27.20    2.50
  -6  -2  11   18.00    2.50
  -6  -2  11   26.10    2.50
   6   2 -11   31.20    3.40
   5  -2  12    8.70    1.50
   5  -2  12   10.30    1.60
  -5   2 -12    8.70    1.40
  -5   2 -12    7.10    1.40
  -5   2 -12    6.70    1.30
   4  -2  12   40.80    3.50
  -4   2 -12   44.20    3.50
  -4   2 -12   41.40    3.20
  -4   2 -12   39.80    2.90
   3  -2  12   34.50    3.30
   3  -2  12   37.10    3.50
   3  -2  12   36.50    3.80
  -3   2 -12   37.70    3.40
  -3   2 -12   38.30    3.00
  -3   2 -12   34.10    3.40
   2  -2  12    4.80    2.00
   2  -2  12    3.60    1.80
  -2   2 -12    5.60    1.60
  -2   2 -12    6.70    1.90
  -2   2 -12    4.50    3.30
  -2   2 -12    8.70    1.90
  -2   2 -12    7.00    1.90
   1  -2  12   47.80    3.60
   1  -2  12   38.00    3.90
   1  -2  12   42.20    3.30
   1  -2  12   40.50    2.90
   1  -2  12   43.30    4.20
  -1   2 -12   44.30    3.40
  -1   2 -12   40.30    2.70
  -1   2 -12   45.60    3.60
  -1   2 -12   38.70    5.40
   0  -2  12   31.20    3.70
   0  -2  12   24.50    2.90
   0  -2  12   29.10    5.70
   0  -2  12   25.80    2.60
   0  -2  12   21.10    2.90
   0   2 -12   27.00    4.40
   0   2 -12   29.40    2.80
   0   2 -12   24.50    2.70
  -1  -2  12   53.39    4.40
  -1  -2  12   44.00    3.40
  -1  -2  12   49.00    4.10
  -1  -2  12   55.19    3.70
   1   2 -12   55.29    3.70
   1   2 -12   46.90    3.40
   1   2 -12   48.70    5.70
  -2  -2  12   41.80    4.30
  -2  -2  12   40.30    3.40
  -2  -2  12   40.60    3.80
  -2  -2  12   40.90    3.20
  -2  -2  12   46.10    4.30
   2   2 -12   42.70    3.30
   2   2 -12   46.20    5.40
  -3  -2  12  263.47   10.60
  -3  -2  12  245.88   10.00
  -3  -2  12  248.38   10.50
  -3  -2  12  267.87   10.70
  -3  -2  12  269.97   10.10
  -3  -2  12  262.97    9.80
  -3  -2  12  268.57   11.00
  -3  -2  12  259.47   10.30
   3   2 -12  261.47   10.10
   3   2 -12  273.77   12.30
  -4  -2  12   40.70    3.70
  -4  -2  12   39.70    3.40
  -4  -2  12   44.90    3.60
  -4  -2  12   41.60    3.60
  -4  -2  12   43.60    4.20
  -4  -2  12   45.50    3.30
  -4  -2  12   44.80    3.10
   4   2 -12   46.90    3.20
  -5  -2  12   66.79    4.00
  -5  -2  12   72.39    4.40
  -5  -2  12   63.59    3.70
  -5  -2  12   65.69    4.10
  -5  -2  12   71.39    3.60
  -5  -2  12   72.49    4.10
   5   2 -12   67.99    3.70
  -6  -2  12   46.00    2.80
  -6  -2  12   47.20    2.40
  -6  -2  12   43.50    2.90
  -6  -2  12   44.10    2.70
  -6  -2  12   43.80    2.80
   4  -2  13    0.20    1.30
  -4   2 -13    1.50    1.20
  -4   2 -13    0.90    1.00
   3  -2  13    2.20    1.60
   3  -2  13   -1.10    1.50
   3  -2  13   -0.70    1.30
  -3   2 -13   -0.50    1.10
  -3   2 -13    0.00    1.50
   2  -2  13   -0.40    1.70
   2  -2  13    0.60    1.80
   2  -2  13    1.20    1.60
  -2   2 -13    0.40    1.60
  -2   2 -13    0.60    1.50
  -2   2 -13    0.60    1.00
   1  -2  13   20.00    2.60
   1  -2  13   24.20    2.90
  -1   2 -13   25.60    2.80
  -1   2 -13   22.80    2.60
  -1   2 -13   19.20    3.90
   0  -2  13  113.39    5.90
   0  -2  13  110.29    5.90
   0  -2  13  111.49    5.10
   0  -2  13  111.89    5.40
   0   2 -13  112.19    5.40
   0   2 -13  110.99    5.60
   0   2 -13  112.99    7.90
  -1  -2  13  102.09    5.00
  -1  -2  13   96.29    5.70
  -1  -2  13   97.69    5.00
  -1  -2  13  108.79    5.30
  -1  -2  13   93.09    5.50
   1   2 -13   99.59    5.00
   1   2 -13   97.19    7.20
   1   2 -13   96.09    5.10
  -2  -2  13   68.19    4.90
  -2  -2  13   69.49    5.00
  -2  -2  13   65.99    5.20
  -2  -2  13   76.39    4.20
  -2  -2  13   70.79    4.30
   2   2 -13   81.39    4.20
   2   2 -13   77.29    6.40
   2   2 -13   71.39    4.30
  -3  -2  13   -0.20    1.90
  -3  -2  13    1.20    1.90
  -3  -2  13    0.10    1.60
  -3  -2  13    1.80    1.40
  -3  -2  13    0.10    1.50
  -3  -2  13   -1.10    1.20
  -3  -2  13    0.10    1.70
   3   2 -13    0.10    1.20
  -4  -2  13   39.00    2.80
  -4  -2  13   41.30    3.00
  -4  -2  13   32.00    3.20
  -4  -2  13   38.80    3.20
  -4  -2  13   39.80    3.00
  -4  -2  13   36.10    3.70
  -4  -2  13   35.40    3.10
  -4  -2  13   32.00    3.20
   4   2 -13   38.00    2.90
  -5  -2  13    0.20    1.10
  -5  -2  13   -2.20    1.10
  -5  -2  13    0.10    1.00
  -5  -2  13    0.80    1.30
  -5  -2  13    0.30    1.00
   5   2 -13    0.30    1.00
   4  -2  14    2.60    1.10
   3  -2  14   32.00    2.90
   3  -2  14   35.20    2.90
   2  -2  14   19.20    2.40
   2  -2  14   23.00    2.60
  -2   2 -14   19.90    2.20
   1  -2  14   14.90    2.50
  -1   2 -14    8.00    1.70
  -1   2 -14    9.60    2.00
   0  -2  14   11.10    1.70
   0  -2  14    6.00    1.70
   0  -2  14    8.00    2.10
   0  -2  14    8.20    2.10
   0   2 -14    8.50    1.80
   0   2 -14    8.20    1.70
  -1  -2  14   48.70    4.20
  -1  -2  14   56.29    3.50
  -1  -2  14   54.49    3.50
  -1  -2  14   57.69    4.10
   1   2 -14   51.89    3.50
   1   2 -14   53.19    3.60
  -2  -2  14   -1.30    1.70
  -2  -2  14   -0.50    1.70
  -2  -2  14   -0.50    1.20
  -2  -2  14    0.70    2.20
  -2  -2  14    3.70    1.60
   2   2 -14   -0.10    1.30
   2   2 -14   -0.70    1.20
  -3  -2  14    2.60    1.40
  -3  -2  14    0.60    1.30
  -3  -2  14    1.50    2.40
  -3  -2  14   -0.30    1.30
  -3  -2  14    1.70    1.70
  -3  -2  14    1.60    1.80
   3   2 -14    5.00    1.50
   3   2 -14    0.70    1.20
  -4  -2  14   10.30    2.00
  -4  -2  14   11.30    1.70
  -4  -2  14    9.90    1.60
  -4  -2  14   10.80    1.70
  -4  -2  14    8.60    1.70
  -4  -2  14    8.70    1.90
   4   2 -14    9.80    1.50
   4   2 -14   11.20    1.60
  -5  -2  14   26.60    2.00
  -5  -2  14   26.50    1.90
  -5  -2  14   29.60    2.20
  -5  -2  14   26.00    2.30
  -5  -2  14   26.20    2.10
   5   2 -14   28.60    1.90
   3  -2  15    1.40    1.20
   3  -2  15    1.80    1.10
   2  -2  15    3.30    1.50
   2  -2  15    1.00    1.50
   1  -2  15    3.10    1.60
  -1   2 -15    2.30    1.50
  -1   2 -15    2.00    1.30
   0  -2  15   34.40    3.30
   0  -2  15   30.80    2.90
   0   2 -15   38.80    3.00
   0   2 -15   32.50    2.70
  -1  -2  15   14.50    2.00
  -1  -2  15   16.60    2.30
  -1  -2  15   15.60    1.90
  -1  -2  15   15.10    2.20
   1   2 -15   10.30    1.70
   1   2 -15   15.70    2.20
  -2  -2  15   27.10    2.80
  -2  -2  15   26.60    2.50
  -2  -2  15   32.20    2.60
  -2  -2  15   31.90    3.20
   2   2 -15   29.60    2.60
   2   2 -15   28.60    2.50
  -3  -2  15    0.50    1.80
  -3  -2  15   -1.00    1.30
  -3  -2  15    0.20    1.10
  -3  -2  15   -0.50    1.30
   3   2 -15   -2.00    1.00
   3   2 -15   -0.90    1.00
  -4  -2  15    2.60    1.00
  -4  -2  15    5.70    1.40
  -4  -2  15    3.30    1.10
  -4  -2  15    6.30    1.20
  -4  -2  15    4.00    1.30
   4   2 -15    3.70    1.10
   2  -2  16    1.20    1.10
   1  -2  16    0.30    1.30
  -1   2 -16    1.10    1.00
   0  -2  16   -0.50    1.30
   0  -2  16    1.50    1.30
   0   2 -16    0.20    1.10
  -1  -2  16   11.30    1.70
  -1  -2  16    8.20    1.70
   1   2 -16   19.30    2.00
   1   2 -16   15.20    1.70
  -2  -2  16    0.70    1.30
  -2  -2  16    3.20    1.10
  -2  -2  16    2.50    1.10
   2   2 -16    1.30    1.10
  -3  -2  16    0.60    0.90
  -3  -2  16    1.40    1.10
  -3  -2  16    0.70    1.10
  -3  -2  16    2.60    1.00
   3   2 -16    0.40    0.80
   3  -3 -16   -0.60    0.80
  -3   3  16   -1.40    0.90
  -3   3  16    0.50    0.90
  -3   3  16   -1.10    1.10
  -3   3  16    0.30    1.30
   2  -3 -16    0.20    0.90
  -2   3  16    0.70    1.30
  -2   3  16    0.70    1.40
  -2   3  16    1.50    1.00
  -2   3  16   -0.40    0.90
  -1   3  16   -0.40    1.40
   0   3  16   29.10    2.80
   0   3  16   25.80    2.40
   1   3  16   13.30    1.70
   1   3  16   11.10    1.70
   2   3  16    2.70    1.20
   4  -3 -15    4.50    1.00
  -4   3  15    3.70    1.00
  -4   3  15    2.20    1.10
  -4   3  15    3.70    1.10
  -4   3  15    2.30    1.30
   3  -3 -15    2.10    1.20
   3  -3 -15    3.40    1.20
  -3   3  15    2.50    1.10
  -3   3  15    0.90    1.50
  -3   3  15    3.00    1.50
  -3   3  15    1.90    1.20
  -3   3  15    2.80    1.30
   2  -3 -15    2.80    1.30
   2  -3 -15    1.10    1.30
  -2   3  15    1.30    1.70
  -2   3  15    5.60    1.30
  -2   3  15    2.80    1.30
  -2   3  15    2.20    1.70
  -1   3  15   68.79    3.30
  -1   3  15   61.99    4.20
   0   3  15   52.69    3.60
   0   3  15   56.89    4.00
  -1  -3 -15    2.50    1.40
   1   3  15    1.20    1.60
   1   3  15    3.30    1.60
  -2  -3 -15    3.20    1.40
   2   3  15    5.20    1.60
  -3  -3 -15   45.60    2.60
   3   3  15   48.70    2.80
  -5   3  14    0.60    1.00
  -5   3  14   -0.30    0.80
  -5   3  14    0.60    1.00
  -5   3  14   -0.30    1.00
   4  -3 -14    4.60    1.30
  -4   3  14    2.40    1.20
  -4   3  14    3.00    1.30
  -4   3  14    4.00    1.50
  -4   3  14    4.10    1.70
   3  -3 -14   11.90    1.80
  -3   3  14   13.70    1.80
  -3   3  14   10.50    2.10
  -3   3  14   10.20    1.90
  -3   3  14   11.10    1.70
  -3   3  14   10.20    2.30
   2  -3 -14   23.20    2.50
   2  -3 -14   31.10    2.70
  -2   3  14   30.20    2.80
  -2   3  14   25.10    3.20
  -2   3  14   24.20    2.60
  -2   3  14   26.00    3.10
  -2   3  14   25.80    2.50
   1  -3 -14    1.90    1.50
   1  -3 -14    2.00    1.40
  -1   3  14    3.30    1.90
  -1   3  14    3.00    1.40
  -1   3  14    4.20    2.00
  -1   3  14    3.40    1.50
   0  -3 -14   21.00    2.50
   0   3  14   19.00    2.70
   0   3  14   18.70    2.50
   0   3  14   18.10    1.80
  -1  -3 -14   32.00    3.00
   1   3  14   37.90    3.50
   1   3  14   44.20    3.60
  -2  -3 -14   45.00    3.40
   2   3  14   41.10    4.30
   2   3  14   52.09    3.70
  -3  -3 -14    7.20    1.10
  -3  -3 -14    7.60    1.60
   3   3  14    7.40    1.80
  -4  -3 -14    3.40    1.00
   4   3  14    2.60    1.20
   5  -3 -13   -0.70    1.00
  -5   3  13   -1.60    1.00
  -5   3  13   -1.40    1.10
  -5   3  13    0.10    1.10
  -5   3  13   -1.20    1.20
  -5   3  13    0.60    1.00
   4  -3 -13    8.40    1.70
  -4   3  13   10.60    1.90
  -4   3  13   12.30    2.20
  -4   3  13   10.30    1.90
  -4   3  13    9.60    2.00
  -4   3  13    9.60    1.60
  -4   3  13   13.00    2.40
  -4   3  13    9.10    1.70
   3  -3 -13  273.57   10.30
  -3   3  13  268.07   10.90
  -3   3  13  283.77   10.80
  -3   3  13  272.57   10.30
  -3   3  13  271.87   11.30
  -3   3  13  269.37   10.00
  -3   3  13  275.87   10.90
   2  -3 -13   55.59    3.60
   2  -3 -13   38.90    5.00
  -2   3  13   52.09    3.40
  -2   3  13   61.19    4.80
  -2   3  13   52.39    4.30
  -2   3  13   47.20    3.50
   1  -3 -13  513.55   17.80
   1  -3 -13  494.15   17.50
   1  -3 -13  521.85   23.50
  -1   3  13  516.55   17.60
  -1   3  13  524.65   17.80
  -1   3  13  527.15   18.30
  -1   3  13  505.85   17.50
  -1   3  13  510.85   18.60
   0  -3 -13   13.70    2.20
   0   3  13   12.60    2.60
   0   3  13   10.50    2.30
  -1  -3 -13   38.60    3.40
  -1  -3 -13   40.60    2.40
   1   3  13   38.20    3.80
   1   3  13   35.40    3.60
  -2  -3 -13  105.79    4.60
  -2  -3 -13   92.29    5.20
   2   3  13  116.89    5.40
   2   3  13  103.99    5.50
  -3  -3 -13    4.30    1.50
  -3  -3 -13    1.20    1.40
   3   3  13    5.20    1.70
   3   3  13    4.20    1.70
  -4  -3 -13   21.80    2.20
  -4  -3 -13   22.10    2.10
  -4  -3 -13   25.50    2.50
   4   3  13   20.40    2.20
   4   3  13   22.30    2.20
  -6   3  12  139.39    5.30
  -6   3  12  131.49    5.00
  -6   3  12  127.89    5.30
  -6   3  12  133.69    5.30
  -5   3  12  116.99    5.40
  -5   3  12  115.49    5.30
  -5   3  12   99.39    5.30
  -5   3  12  112.79    5.10
  -5   3  12  113.99    5.70
  -5   3  12  115.59    5.00
  -4   3  12    3.60    1.70
  -4   3  12    0.40    1.40
  -4   3  12    4.80    2.00
  -4   3  12    4.00    1.80
  -4   3  12    2.30    2.00
  -4   3  12    2.20    1.80
  -4   3  12    2.90    1.50
   3  -3 -12   21.50    4.10
   3  -3 -12   27.90    2.80
  -3   3  12   24.40    2.50
  -3   3  12   24.60    3.30
  -3   3  12   21.80    3.40
  -3   3  12   25.80    3.10
  -3   3  12   27.80    2.80
  -3   3  12   24.30    3.10
   2  -3 -12    5.60    1.70
   2  -3 -12    4.90    2.60
  -2   3  12    7.10    1.60
  -2   3  12    4.20    1.60
  -2   3  12    5.60    2.10
  -2   3  12    4.90    2.10
  -2   3  12    3.80    2.10
   1  -3 -12    9.70    1.80
   1  -3 -12    9.30    2.00
   1  -3 -12    8.30    3.00
  -1   3  12    5.70    1.70
  -1   3  12    5.30    1.70
  -1   3  12    6.60    2.40
  -1   3  12    8.30    2.30
  -1   3  12   10.10    1.80
   0  -3 -12   40.90    3.40
   0   3  12   44.40    3.10
   0   3  12   48.20    4.00
   0   3  12   45.90    4.00
  -1  -3 -12  124.29    6.10
  -1  -3 -12  131.59    5.30
   1   3  12  128.19    6.30
   1   3  12  124.99    5.00
   1   3  12  127.19    6.10
  -2  -3 -12   83.99    4.70
  -2  -3 -12   79.09    4.60
  -2  -3 -12   81.89    4.20
   2   3  12   86.29    4.60
   2   3  12   74.59    4.70
   2   3  12   77.29    4.70
  -3  -3 -12  191.68    7.60
  -3  -3 -12  177.68    7.30
  -3  -3 -12  181.68    7.80
  -3  -3 -12  183.08    7.60
   3   3  12  175.88    7.70
   3   3  12  183.48    7.60
   3   3  12  179.18    7.60
  -4  -3 -12   64.99    3.90
  -4  -3 -12   54.89    3.40
  -4  -3 -12   59.09    3.70
   4   3  12   55.59    3.80
   4   3  12   59.19    3.60
  -5  -3 -12    6.80    1.40
  -5  -3 -12    5.80    1.20
  -5  -3 -12    8.20    1.50
   5   3  12    6.10    1.40
   5   3  12    4.40    1.30
  -6   3  11   16.30    2.10
  -6   3  11   22.70    2.00
  -6   3  11   18.70    2.10
  -6   3  11   22.50    2.30
  -6   3  11   16.60    1.90
  -5   3  11   44.60    3.70
  -5   3  11   46.50    3.40
  -5   3  11   35.30    3.20
  -5   3  11   31.80    3.50
  -5   3  11   36.70    3.50
  -5   3  11   44.80    3.10
  -5   3  11   34.00    3.50
   4  -3 -11    7.50    3.00
  -4   3  11   13.30    2.60
  -4   3  11   17.10    3.90
  -4   3  11    5.90    2.10
  -4   3  11   11.30    2.30
  -4   3  11    9.50    1.90
  -4   3  11    8.90    2.40
  -4   3  11   15.30    2.90
  -4   3  11   11.20    2.20
   3  -3 -11   17.00    3.70
  -3   3  11   15.40    3.80
  -3   3  11   13.70    2.70
  -3   3  11   16.70    2.60
  -3   3  11   17.80    4.20
  -3   3  11    9.30    2.70
  -3   3  11   21.10    2.40
  -3   3  11   12.90    2.20
  -3   3  11   16.90    2.80
  -3   3  11   20.30    3.10
   2  -3 -11   21.80    3.70
   2  -3 -11   23.20    4.10
  -2   3  11   14.70    3.80
  -2   3  11   15.80    2.60
  -2   3  11   21.80    2.50
   1  -3 -11   12.60    3.40
   1  -3 -11   11.20    1.90
   1  -3 -11   12.30    3.10
  -1   3  11   12.30    2.00
  -1   3  11   12.60    3.60
   0   3  11  288.27   13.70
   1   3  11   38.50    5.20
  -2  -3 -11   51.09    3.70
  -2  -3 -11   42.90    3.30
  -2  -3 -11   47.80    3.80
   2   3  11   44.30    3.60
   2   3  11   45.50    3.70
  -3  -3 -11  116.29    5.90
  -3  -3 -11  125.39    5.90
  -3  -3 -11  126.69    6.10
   3   3  11  123.09    6.00
   3   3  11  119.89    5.90
   3   3  11  119.99    6.00
  -4  -3 -11    0.10    1.40
  -4  -3 -11    1.40    1.50
  -4  -3 -11    2.00    1.40
  -4  -3 -11   -0.70    1.40
   4   3  11    1.10    1.50
   4   3  11    1.10    1.40
   4   3  11   -0.40    1.50
  -5  -3 -11    4.60    1.40
  -5  -3 -11    1.80    1.40
  -5  -3 -11    4.60    1.30
  -5  -3 -11    2.80    1.40
   5   3  11    1.60    1.20
   5   3  11    4.10    1.50
  -7   3  10   -0.60    0.90
  -7   3  10    1.50    1.00
  -6   3  10   19.50    2.30
  -6   3  10   21.60    2.40
  -6   3  10   21.10    2.10
  -6   3  10   25.50    2.80
  -6   3  10   18.30    2.10
  -5   3  10   10.50    2.10
  -5   3  10    7.40    2.10
  -5   3  10   12.20    2.40
  -5   3  10    9.60    2.30
  -5   3  10   12.90    3.70
  -5   3  10    6.10    2.10
  -5   3  10    9.70    1.90
   4  -3 -10   12.80    3.60
  -4   3  10   17.80    3.90
  -4   3  10   12.80    2.80
  -4   3  10   12.90    2.30
  -4   3  10   19.10    3.10
  -4   3  10   16.50    2.70
  -4   3  10   12.70    2.60
  -4   3  10   11.10    2.10
  -4   3  10   12.60    2.60
   3  -3 -10    3.50    2.60
   3  -3 -10    3.80    2.50
  -3   3  10    3.50    2.80
  -3   3  10    4.10    2.00
  -3   3  10    3.70    1.70
  -3   3  10    2.90    3.00
  -3   3  10    0.30    2.90
   2  -3 -10    0.10    2.00
   2  -3 -10   -0.40    2.00
  -2   3  10    1.20    2.20
  -2   3  10    0.00    2.50
  -2   3  10    0.70    1.50
  -2   3  10   -1.10    1.20
   1  -3 -10    6.30    2.30
   1  -3 -10    4.40    2.10
  -1   3  10    9.10    2.80
  -1   3  10    9.30    2.10
   0  -3 -10   78.89    5.80
   0  -3 -10   77.39    5.40
   0   3  10   76.69    6.20
   1   3  10   17.40    3.40
   1   3  10    8.80    1.70
   2   3  10    5.80    1.70
   2   3  10    5.70    2.70
  -3  -3 -10    4.80    1.90
  -3  -3 -10    7.50    1.90
  -3  -3 -10    5.70    1.80
   3   3  10    8.00    2.20
   3   3  10    6.30    1.80
  -4  -3 -10    6.80    1.70
  -4  -3 -10    7.40    1.90
  -4  -3 -10    8.10    2.10
  -4  -3 -10    5.20    1.70
  -4  -3 -10    5.20    1.80
   4   3  10    6.50    1.90
   4   3  10    6.00    1.80
  -5  -3 -10    1.70    1.40
  -5  -3 -10    3.30    1.60
  -5  -3 -10    4.40    1.60
  -5  -3 -10    3.90    1.60
  -5  -3 -10    4.10    1.50
   5   3  10    6.20    1.60
   5   3  10    6.80    1.80
   5   3  10    1.30    2.20
  -6  -3 -10    2.20    1.10
  -6  -3 -10    0.30    1.10
  -6  -3 -10    2.70    1.30
  -6  -3 -10    0.50    1.00
   6   3  10    1.70    1.30
  -7   3   9    2.10    0.90
  -7   3   9    0.90    1.10
  -7   3   9    2.20    1.10
  -6   3   9   18.10    2.10
  -6   3   9   18.80    2.30
  -6   3   9   14.80    2.40
  -6   3   9   16.60    2.40
  -6   3   9   21.20    2.70
   5  -3  -9   15.30    3.80
  -5   3   9   12.90    2.70
  -5   3   9   14.30    2.70
  -5   3   9   18.30    2.80
  -5   3   9   13.70    2.30
  -5   3   9   13.00    2.30
  -5   3   9   19.20    4.30
  -5   3   9   11.50    2.50
   4  -3  -9  160.88    9.50
   4  -3  -9  166.58    9.50
  -4   3   9  176.48    8.20
  -4   3   9  156.58   10.40
  -4   3   9  179.08    9.90
  -4   3   9  186.98    7.70
  -4   3   9  164.48   10.20
   3  -3  -9   13.90    3.20
   3  -3  -9   13.10    3.20
  -3   3   9   11.50    2.00
  -3   3   9    8.20    3.20
  -3   3   9   12.30    2.40
  -3   3   9   14.00    3.40
  -3   3   9   12.30    3.30
   2  -3  -9    1.80    1.80
   2  -3  -9   -0.50    1.80
  -2   3   9   -0.30    1.20
  -2   3   9   -0.10    2.10
  -2   3   9    0.60    1.90
  -2   3   9    1.00    2.30
   1  -3  -9  112.89    6.40
   1  -3  -9  118.89    6.70
  -1   3   9  113.59    7.00
  -1   3   9  111.49    5.40
   0  -3  -9  116.19    6.50
   0  -3  -9  121.99    6.80
   0   3   9  132.49    7.30
   1   3   9   67.49    5.10
   1   3   9   62.39    3.50
  -2  -3  -9    2.70    1.30
   2   3   9    3.70    2.20
   2   3   9   -2.30    2.10
   2   3   9    2.20    1.50
  -3  -3  -9  212.38    8.50
   3   3   9  204.38   10.70
   3   3   9  203.48    8.40
   3   3   9  196.68   10.50
  -4  -3  -9  104.09    5.30
  -4  -3  -9  105.89    5.70
  -4  -3  -9   94.69    5.40
  -4  -3  -9  101.89    5.20
  -4  -3  -9  104.59    5.60
  -4  -3  -9  105.19    5.70
  -4  -3  -9  103.79    5.50
   4   3   9  107.79    5.50
   4   3   9   91.29    5.20
  -5  -3  -9   49.40    3.80
  -5  -3  -9   55.59    3.80
  -5  -3  -9   51.19    3.90
  -5  -3  -9   54.79    4.10
  -5  -3  -9   52.29    3.90
  -5  -3  -9   50.39    4.00
  -5  -3  -9   54.79    3.90
   5   3   9   53.79    3.70
  -6  -3  -9   13.80    2.00
  -6  -3  -9   15.40    2.00
  -6  -3  -9   15.30    1.90
  -6  -3  -9   11.10    1.80
  -6  -3  -9   12.70    1.90
  -6  -3  -9   15.20    2.10
   6   3   9   17.30    2.00
  -7   3   8    0.40    1.10
  -7   3   8    0.00    1.00
  -7   3   8   -0.20    1.00
  -7   3   8    0.40    1.20
  -6   3   8    8.70    2.20
  -6   3   8    4.90    1.80
  -6   3   8    6.00    1.70
  -6   3   8    9.40    2.10
   5  -3  -8   58.79    6.50
  -5   3   8   61.49    4.00
  -5   3   8   44.70    4.10
  -5   3   8   47.60    4.20
  -5   3   8   53.89    3.70
  -5   3   8   48.40    5.90
  -5   3   8   48.90    4.30
  -5   3   8   49.30    4.50
   4  -3  -8   62.49    5.60
   4  -3  -8   60.89    5.80
  -4   3   8   63.29    4.00
  -4   3   8   57.79    6.70
  -4   3   8   60.49    4.50
  -4   3   8   70.49    6.80
  -4   3   8   64.89    5.70
   3  -3  -8   33.80    4.40
   3  -3  -8   43.20    4.80
  -3   3   8   25.90    3.90
  -3   3   8   30.90    4.10
  -3   3   8   34.90    3.20
  -3   3   8   22.80    4.00
   2  -3  -8  107.89    6.30
   2  -3  -8  112.99    6.30
  -2   3   8   92.49    6.40
  -2   3   8  108.29    5.30
  -2   3   8  100.89    6.30
  -2   3   8  117.89    7.20
   1  -3  -8  260.67   10.50
   1  -3  -8  252.37   10.80
  -1   3   8  245.98   10.50
  -1   3   8  254.47   11.10
   0  -3  -8  997.90   33.00
   0  -3  -8  952.20   32.40
   0   3   8  974.20   32.60
   0   3   8  958.30   33.00
  -1  -3  -8  100.99    4.60
   1   3   8  108.49    6.00
   1   3   8  103.09    6.10
   1   3   8  104.59    4.70
  -2  -3  -8    8.80    1.50
   2   3   8    9.50    1.70
   2   3   8    8.20    2.70
   2   3   8    6.40    2.40
  -3  -3  -8   -0.70    1.20
  -3  -3  -8    3.00    1.40
   3   3   8    1.40    2.10
   3   3   8   -1.50    1.20
   3   3   8    2.80    2.60
  -4  -3  -8  111.09    8.70
  -4  -3  -8  112.69    5.60
  -4  -3  -8  122.29    5.90
  -4  -3  -8  121.99    6.20
  -4  -3  -8  114.59    6.00
  -4  -3  -8  109.09    6.10
  -4  -3  -8  119.49    6.60
  -4  -3  -8  119.59    6.20
  -4  -3  -8  125.59    5.90
  -4  -3  -8  121.19    6.10
   4   3   8  111.19    6.00
   4   3   8  123.79    5.90
   4   3   8  119.69    8.30
   4   3   8  116.29    9.90
  -5  -3  -8   18.10    2.80
  -5  -3  -8   20.40    2.60
  -5  -3  -8   21.20    2.80
  -5  -3  -8   16.50    2.40
  -5  -3  -8   21.80    2.80
  -5  -3  -8   17.10    2.50
  -5  -3  -8   17.50    2.50
  -5  -3  -8   20.30    2.70
   5   3   8   16.90    2.50
  -6  -3  -8    4.30    1.60
  -6  -3  -8    5.90    1.60
  -6  -3  -8    3.90    1.60
  -6  -3  -8    5.30    1.90
  -6  -3  -8    4.30    1.70
  -6  -3  -8    4.80    1.60
  -7   3   7    1.60    1.30
  -7   3   7   -0.20    1.20
  -7   3   7    1.20    1.20
  -6   3   7   61.59    4.00
  -6   3   7   63.79    4.40
  -6   3   7   63.69    4.40
  -6   3   7   65.29    3.90
  -5   3   7    5.90    3.20
  -5   3   7    1.00    1.90
  -5   3   7    3.30    1.90
  -5   3   7    1.00    3.60
  -5   3   7    1.20    1.70
  -5   3   7    4.50    1.70
  -5   3   7    1.80    1.40
  -5   3   7    0.60    1.90
   4  -3  -7  207.88   10.30
  -4   3   7  237.28   11.60
  -4   3   7  203.98   10.60
  -4   3   7  215.68    8.70
  -4   3   7  232.58   11.60
  -4   3   7  220.98    9.20
   3  -3  -7   58.49    4.70
  -3   3   7   54.89    3.80
  -3   3   7   61.59    5.20
  -3   3   7   68.89    5.20
  -3   3   7   59.99    5.30
   2  -3  -7  247.38   10.20
   2  -3  -7  234.08   10.10
  -2   3   7  238.58   10.70
  -2   3   7  226.48   10.00
  -2   3   7  237.98    9.50
  -2   3   7  238.38   10.60
   1  -3  -7  185.58    8.50
   1  -3  -7  197.88    8.40
  -1   3   7  196.18    8.40
  -1   3   7  191.98    8.80
  -1   3   7  200.38    8.50
  -1   3   7  204.98    8.70
   0  -3  -7    1.70    1.30
   0   3   7    2.90    1.60
   0   3   7    3.20    1.50
  -1  -3  -7    1.20    1.30
   1   3   7   -0.10    1.30
   1   3   7    1.90    1.50
  -2  -3  -7   12.80    1.80
  -2  -3  -7   18.20    2.90
  -2  -3  -7   13.60    1.80
   2   3   7   10.70    2.30
   2   3   7   14.00    2.80
   2   3   7   12.20    1.70
  -3  -3  -7   16.80    2.20
  -3  -3  -7   15.60    3.10
  -3  -3  -7   13.90    1.90
   3   3   7   15.50    3.20
   3   3   7   16.70    2.10
   3   3   7   14.30    3.10
   3   3   7   15.80    3.30
  -4  -3  -7  134.39    8.60
  -4  -3  -7  135.69    6.40
  -4  -3  -7  146.59    6.40
   4   3   7  136.79    6.30
   4   3   7  127.69    8.80
   4   3   7  139.79    8.20
   4   3   7  139.99    8.50
  -5  -3  -7   18.20    2.70
  -5  -3  -7   17.10    2.40
  -5  -3  -7   18.10    2.60
  -5  -3  -7   14.30    2.40
  -5  -3  -7   13.60    2.40
  -5  -3  -7   10.80    2.20
  -5  -3  -7   17.10    2.90
  -5  -3  -7   12.50    2.30
   5   3   7   14.40    2.30
  -6  -3  -7    0.70    1.50
  -6  -3  -7   -0.60    1.40
  -6  -3  -7    1.00    1.50
  -6  -3  -7    0.90    1.50
  -6  -3  -7    1.10    1.70
  -6  -3  -7   -2.30    1.40
  -6  -3  -7    1.70    1.60
   6   3   7    1.10    1.40
  -7  -3  -7   25.40    2.50
  -7  -3  -7   23.30    2.20
  -7  -3  -7   22.40    2.30
  -7  -3  -7   21.70    2.10
  -7  -3  -7   26.40    2.30
  -7   3   6    8.80    1.80
  -7   3   6    9.20    1.70
  -7   3   6    7.20    1.50
  -6   3   6   13.50    2.00
  -6   3   6   12.00    2.50
  -6   3   6    9.90    2.40
  -6   3   6   11.50    2.10
  -6   3   6    5.50    3.40
   5  -3  -6   83.99    7.40
  -5   3   6   79.99    6.50
  -5   3   6   74.39    7.00
  -5   3   6   73.79    4.50
  -5   3   6   81.19    7.00
  -4   3   6    8.90    2.90
  -4   3   6    6.40    1.90
  -4   3   6    8.30    2.80
  -4   3   6    7.10    2.80
   3  -3  -6    4.70    1.80
  -3   3   6    5.20    2.10
  -3   3   6    5.10    1.50
  -3   3   6    4.30    2.10
  -3   3   6    9.90    2.70
  -3   3   6    3.30    1.80
   2  -3  -6   14.00    2.30
  -2   3   6   16.90    2.60
  -2   3   6   16.60    2.70
  -2   3   6   19.10    3.00
  -2   3   6   14.60    2.60
   1  -3  -6  319.27   12.20
   1  -3  -6  330.27   12.10
  -1   3   6  311.47   12.40
  -1   3   6  335.77   12.30
  -1   3   6  320.37   12.10
  -1   3   6  334.97   12.10
   0  -3  -6  150.78    6.60
   0   3   6  148.69    6.60
   0   3   6  146.79    6.70
  -1  -3  -6    1.60    1.20
  -1  -3  -6    1.40    1.30
   1   3   6    2.00    1.50
   1   3   6    1.80    1.30
   1   3   6    1.60    1.30
  -2  -3  -6  299.27   11.70
   2   3   6  286.07   11.50
   2   3   6  286.37   11.60
   2   3   6  295.67   12.00
  -3  -3  -6  226.48    8.50
  -3  -3  -6  221.68   10.30
  -3  -3  -6  218.58    8.40
   3   3   6  212.98    9.80
   3   3   6  223.48    8.30
   3   3   6  227.48   10.10
  -4  -3  -6    1.10    1.50
  -4  -3  -6    3.00    2.30
  -4  -3  -6   -0.30    1.10
   4   3   6    1.20    2.50
   4   3   6   -0.30    2.50
   4   3   6   -0.60    1.90
   4   3   6    2.30    1.40
  -5  -3  -6  149.29    6.90
  -5  -3  -6  144.79    7.20
  -5  -3  -6  145.59    7.00
  -5  -3  -6  142.49    6.50
  -5  -3  -6  146.99    6.80
  -5  -3  -6  141.79    6.90
  -5  -3  -6  144.39    7.00
  -5  -3  -6  139.09    6.90
   5   3   6  150.58    6.60
  -6  -3  -6   -1.30    1.30
  -6  -3  -6    0.40    1.50
  -6  -3  -6    1.80    1.70
  -6  -3  -6   -0.20    1.50
  -6  -3  -6   -1.80    1.40
  -6  -3  -6    0.50    1.60
  -6  -3  -6   -0.40    1.70
  -6  -3  -6   -1.80    1.30
   6   3   6   -0.50    1.40
  -7  -3  -6    3.70    1.50
  -7  -3  -6    3.50    1.40
  -7  -3  -6    6.80    1.50
  -7  -3  -6    5.50    1.60
  -7  -3  -6    4.20    1.50
  -7   3   5    6.60    1.70
  -7   3   5   10.00    1.70
  -6   3   5   90.09    5.50
  -6   3   5   94.59    5.10
  -6   3   5   85.29    7.10
  -6   3   5   95.49    4.90
  -6   3   5   91.99    4.80
   5  -3  -5   16.70    4.00
  -5   3   5   12.20    3.30
  -5   3   5   18.70    2.40
  -5   3   5   13.60    3.80
  -5   3   5   17.50    4.10
   4  -3  -5   97.89    6.80
  -4   3   5  110.89    6.70
  -4   3   5   93.69    6.60
  -4   3   5   90.29    6.20
  -4   3   5   85.39    4.80
  -4   3   5   91.79    6.50
   3  -3  -5   20.90    2.80
  -3   3   5   21.30    3.10
  -3   3   5   23.90    3.20
  -3   3   5   20.30    3.20
  -3   3   5   19.90    3.20
   2  -3  -5  152.98    7.00
  -2   3   5  167.28    7.50
  -2   3   5  158.68    7.40
  -2   3   5  163.38    7.10
  -2   3   5  152.28    7.10
   1  -3  -5   69.99    3.90
  -1   3   5   72.89    4.10
  -1   3   5   78.39    4.10
  -1   3   5   72.19    4.10
   0  -3  -5  191.48   10.10
   0  -3  -5  216.38    8.10
   0   3   5  208.08   10.30
   0   3   5  210.18    8.10
   0   3   5  208.48    8.00
   0   3   5  192.28   10.20
  -1  -3  -5  509.25   17.60
  -1  -3  -5  523.45   17.70
  -1  -3  -5  514.05   19.20
   1   3   5  523.45   17.80
   1   3   5  506.85   17.80
   1   3   5  534.65   17.90
   1   3   5  505.15   19.40
  -2  -3  -5  364.76   13.40
   2   3   5  362.26   13.20
   2   3   5  339.27   13.20
  -3  -3  -5    4.70    1.20
  -3  -3  -5    3.50    1.20
  -3  -3  -5    2.60    1.60
  -3  -3  -5    4.50    1.80
   3   3   5    3.00    1.60
   3   3   5    4.50    1.90
  -4  -3  -5    0.50    1.10
  -4  -3  -5    2.40    2.10
  -4  -3  -5    1.60    2.00
  -4  -3  -5    1.20    1.40
   4   3   5    2.90    2.20
   4   3   5   -0.50    1.90
   4   3   5    6.40    1.60
  -5  -3  -5    1.50    1.60
  -5  -3  -5   -0.90    2.50
  -5  -3  -5    1.30    2.10
  -5  -3  -5    1.30    2.60
  -5  -3  -5   -0.40    1.20
  -5  -3  -5    0.20    2.40
   5   3   5    1.30    1.50
   5   3   5    4.20    2.50
   5   3   5   -1.70    2.50
   5   3   5    1.30    3.10
  -6  -3  -5   58.59    4.20
  -6  -3  -5   60.09    4.60
  -6  -3  -5   56.69    4.20
  -6  -3  -5   53.09    4.20
  -6  -3  -5   56.79    4.20
  -6  -3  -5   60.49    4.30
  -6  -3  -5   56.29    4.10
  -7  -3  -5   65.19    3.80
  -7  -3  -5   68.69    4.00
  -7  -3  -5   61.49    3.90
  -7  -3  -5   68.89    4.10
  -7  -3  -5   66.49    4.00
  -7   3   4   64.39    3.70
  -7   3   4   69.99    3.70
  -7   3   4   59.59    3.80
  -6   3   4   49.20    3.70
  -6   3   4   50.29    5.80
  -6   3   4   44.70    3.50
  -6   3   4   45.50    4.30
  -6   3   4   50.09    3.70
   5  -3  -4   13.30    3.60
  -5   3   4   19.90    3.80
  -5   3   4   11.10    3.20
  -5   3   4   14.30    3.50
  -5   3   4   14.20    2.30
  -5   3   4   18.20    3.80
   4  -3  -4  175.68    9.50
  -4   3   4  190.38    9.50
  -4   3   4  183.08    9.20
  -4   3   4  199.08    9.60
  -4   3   4  192.08    9.20
   3  -3  -4   30.50    3.10
  -3   3   4   29.50    3.50
  -3   3   4   27.70    3.40
  -3   3   4   37.60    3.50
  -3   3   4   32.40    3.80
   2  -3  -4    1.60    1.10
  -2   3   4    2.80    1.50
  -2   3   4   -0.20    1.30
  -2   3   4    2.70    1.40
   1  -3  -4   10.70    1.60
  -1   3   4    9.80    1.70
  -1   3   4    9.90    2.20
  -1   3   4   12.80    1.90
  -1   3   4   13.10    1.80
   0  -3  -4  759.62   25.80
   0  -3  -4  700.03   25.60
   0  -3  -4  702.93   23.60
   0   3   4  719.93   25.60
   0   3   4  704.63   25.70
   0   3   4  711.83   23.70
   0   3   4  727.23   23.60
   0   3   4  718.33   23.50
  -1  -3  -4  261.77    9.50
  -1  -3  -4  252.37   10.60
  -1  -3  -4  253.77    9.30
  -1  -3  -4  263.97   11.50
   1   3   4  260.37    9.70
   1   3   4  244.38   11.30
   1   3   4  248.48   10.80
   1   3   4  260.27    9.40
   1   3   4  253.27    9.50
  -2  -3  -4 1122.99   36.90
  -2  -3  -4 1149.39   36.70
   2   3   4 1135.79   36.60
   2   3   4 1081.49   36.70
  -3  -3  -4    2.80    1.40
  -3  -3  -4   -0.30    1.30
   3   3   4    1.50    1.60
   3   3   4    0.60    1.30
  -4  -3  -4    0.90    1.90
  -4  -3  -4    2.80    2.20
  -4  -3  -4   -1.20    1.10
  -4  -3  -4   -0.10    1.00
   4   3   4    3.60    1.80
   4   3   4   -2.00    1.60
  -5  -3  -4   20.20    4.00
  -5  -3  -4   12.20    3.40
  -5  -3  -4   16.00    2.50
  -5  -3  -4   23.60    2.60
   5   3   4   15.10    2.20
   5   3   4   11.70    3.40
   5   3   4   17.70    3.60
  -6  -3  -4    9.40    2.30
  -6  -3  -4   10.30    2.20
  -6  -3  -4   11.30    2.40
  -6  -3  -4    8.80    2.10
  -6  -3  -4   11.80    2.50
  -6  -3  -4   12.30    2.30
  -7  -3  -4    4.00    1.60
  -7  -3  -4    1.90    1.50
  -7  -3  -4    2.60    1.60
  -7  -3  -4    2.30    1.50
  -7  -3  -4    0.40    1.50
  -7   3   3    6.00    1.70
  -7   3   3   11.00    1.80
  -7   3   3    8.20    1.80
  -6   3   3    9.80    2.00
  -6   3   3    6.90    1.90
  -6   3   3    0.40    3.20
  -6   3   3    9.50    2.00
   5  -3  -3   76.69    6.60
  -5   3   3   78.49    6.30
  -5   3   3   75.09    6.20
  -5   3   3   77.79    6.40
  -5   3   3   80.99    6.30
  -5   3   3   73.69    4.40
   4  -3  -3   13.10    3.00
  -4   3   3   12.30    2.70
  -4   3   3   16.70    3.20
  -4   3   3   16.40    3.20
  -4   3   3   13.90    1.80
  -4   3   3   15.80    3.00
   3  -3  -3    8.80    1.60
  -3   3   3    6.50    1.80
  -3   3   3    8.90    2.00
  -3   3   3    5.80    1.80
  -3   3   3    4.40    1.70
  -3   3   3    5.90    1.80
   2  -3  -3  745.03   23.70
  -2   3   3  754.62   24.30
  -2   3   3  749.33   24.00
  -2   3   3  610.94   23.60
  -2   3   3  740.53   24.20
   1  -3  -3   54.39    2.90
   1  -3  -3   60.69    4.00
   1  -3  -3   49.50    3.90
  -1   3   3   58.19    3.20
  -1   3   3   52.09    4.00
  -1   3   3   48.80    2.90
  -1   3   3   57.79    4.10
   0  -3  -3 1079.79   35.10
   0  -3  -3 1048.80   35.10
   0   3   3 1039.40   35.00
   0   3   3 1063.69   35.20
   0   3   3  985.20   33.60
   0   3   3 1065.49   33.70
  -1  -3  -3   21.60    2.60
  -1  -3  -3   18.50    2.00
  -1  -3  -3   22.80    2.90
  -1  -3  -3   20.90    2.80
   1   3   3   20.50    2.80
   1   3   3   19.20    2.10
   1   3   3   20.00    2.70
   1   3   3   13.40    2.20
   1   3   3   22.60    2.90
   1   3   3   19.70    1.80
   1   3   3   18.80    2.00
  -2  -3  -3  337.37   12.20
  -2  -3  -3  302.87   12.00
  -2  -3  -3  356.46   12.70
   2   3   3  350.06   12.20
   2   3   3  356.66   12.30
  -3  -3  -3   67.39    4.70
  -3  -3  -3   64.29    4.20
   3   3   3   69.99    4.40
   3   3   3   66.09    4.20
  -4  -3  -3  697.73   25.30
  -4  -3  -3  711.03   23.10
  -4  -3  -3  677.23   22.90
  -4  -3  -3  694.03   24.60
   4   3   3  673.13   24.40
   4   3   3  681.13   24.70
  -5  -3  -3  724.43   23.90
  -5  -3  -3  712.43   25.90
  -5  -3  -3  702.03   26.70
  -5  -3  -3  714.73   23.60
   5   3   3  675.53   23.30
   5   3   3  692.93   26.00
  -6  -3  -3    1.10    1.80
  -6  -3  -3    3.90    1.80
  -6  -3  -3    5.60    2.10
  -6  -3  -3    3.10    1.90
  -6  -3  -3    5.80    1.90
  -6  -3  -3    1.60    1.70
  -7  -3  -3   25.20    2.70
  -7  -3  -3   23.80    2.60
  -7  -3  -3   31.10    3.10
  -7  -3  -3   23.00    2.70
  -8   3   2  135.59    5.20
  -7   3   2    0.10    1.40
  -7   3   2    2.70    1.50
  -7   3   2    0.20    1.30
  -7   3   2   -0.20    1.30
  -6   3   2  201.98    8.40
  -6   3   2  208.98    8.50
  -6   3   2  212.28    8.80
  -6   3   2  211.68    8.60
  -6   3   2  208.48   11.20
  -6   3   2  205.08    8.70
   5  -3  -2   31.10    4.60
  -5   3   2   36.70    4.90
  -5   3   2   31.80    3.10
  -5   3   2   31.60    4.60
  -5   3   2   38.50    3.20
  -5   3   2   36.90    5.00
  -5   3   2   26.80    4.30
   4  -3  -2  405.36   16.40
  -4   3   2  402.96   14.30
  -4   3   2  431.16   16.50
  -4   3   2  405.96   16.40
  -4   3   2  447.36   16.40
  -4   3   2  422.06   16.50
  -4   3   2  436.66   16.40
   3  -3  -2  184.18    8.20
  -3   3   2  189.68    8.20
  -3   3   2  172.68    8.00
  -3   3   2  196.68    8.20
  -3   3   2  174.48    7.80
  -3   3   2  174.98    7.90
   2  -3  -2  608.84   19.60
   2  -3  -2  584.44   20.30
   2  -3  -2  563.24   20.10
   2  -3  -2  612.84   19.80
  -2   3   2  596.84   20.00
  -2   3   2  581.94   19.90
  -2   3   2  557.34   19.80
  -2   3   2  621.14   20.10
  -2   3   2  587.44   19.90
   1  -3  -2    9.80    1.80
   1  -3  -2    9.20    1.20
   1  -3  -2    9.10    1.90
  -1   3   2   13.90    1.40
  -1   3   2    8.10    1.80
  -1   3   2    6.30    1.70
   0  -3  -2 2734.43   83.99
   0  -3  -2 2719.43   83.99
   0  -3  -2 2637.94   82.99
   0   3   2 2635.04   83.89
   0   3   2 2683.43   83.99
   0   3   2 2627.84   82.99
   0   3   2 2506.35   82.89
  -1  -3  -2  275.47   10.60
  -1  -3  -2  278.37   10.70
  -1  -3  -2  271.27   10.70
   1   3   2  269.57   10.60
   1   3   2  282.67   10.60
   1   3   2  290.07   10.90
   1   3   2  251.07   10.50
  -2  -3  -2 3285.07  103.19
  -2  -3  -2 2829.22  102.39
  -2  -3  -2 3393.86  102.69
  -2  -3  -2 3254.57  102.69
  -2  -3  -2 3499.25  105.19
   2   3   2 3379.76  102.89
   2   3   2 3165.88  104.99
   2   3   2 3446.26  102.69
  -3  -3  -2  103.19    5.40
  -3  -3  -2  110.49    5.90
  -3  -3  -2  109.59    5.30
   3   3   2  121.39    5.80
  -4  -3  -2  170.18    6.80
  -4  -3  -2  162.68    7.90
  -4  -3  -2  158.78    6.60
  -4  -3  -2  166.18    8.60
  -4  -3  -2  163.08    7.80
   4   3   2  163.08    7.80
   4   3   2  171.28    8.20
  -5  -3  -2  243.18   12.10
  -5  -3  -2  250.27    9.70
  -5  -3  -2  243.48   11.50
   5   3   2  263.57   11.80
  -6  -3  -2   35.60    3.50
  -6  -3  -2   36.60    3.70
  -6  -3  -2   39.40    3.90
  -6  -3  -2   42.10    3.60
  -6  -3  -2   35.80    3.70
  -7  -3  -2    1.40    1.60
  -7  -3  -2    3.30    1.70
  -7  -3  -2    3.30    1.80
  -7  -3  -2    2.90    1.70
  -8   3   1    2.00    1.10
  -8   3   1    1.20    1.10
   7  -3  -1   38.10    3.30
  -7   3   1   38.90    3.20
  -7   3   1   31.00    3.20
  -7   3   1   39.50    3.30
  -6   3   1   64.89    4.20
  -6   3   1   59.09    4.40
  -6   3   1   59.69    4.20
  -6   3   1   52.49    4.00
  -6   3   1   49.10    6.10
  -6   3   1   61.49    4.10
  -6   3   1   52.99    3.90
  -5   3   1  409.76   17.30
  -5   3   1  424.36   15.20
  -5   3   1  433.26   14.90
  -5   3   1  399.46   17.40
  -5   3   1  418.76   17.90
  -5   3   1  443.46   17.50
   4  -3  -1   33.40    3.90
  -4   3   1   39.20    2.70
  -4   3   1   34.20    4.20
  -4   3   1   33.00    4.00
  -4   3   1   39.00    4.20
  -4   3   1   35.00    4.40
  -4   3   1   34.10    4.10
   3  -3  -1  845.82   28.10
  -3   3   1  806.92   28.20
  -3   3   1  809.32   27.90
  -3   3   1  820.72   28.00
  -3   3   1  851.81   28.00
  -3   3   1  826.12   28.10
   2  -3  -1  954.80   32.10
   2  -3  -1  993.00   32.40
   2  -3  -1  987.20   32.00
  -2   3   1  960.70   31.80
  -2   3   1  957.80   32.80
  -2   3   1  951.20   31.90
  -2   3   1 1006.70   32.50
  -2   3   1 1011.70   32.00
  -2   3   1  983.30   31.80
   1  -3  -1   13.00    2.00
   1  -3  -1   11.90    1.50
   1  -3  -1    8.30    1.60
  -1   3   1   11.70    1.90
  -1   3   1    9.00    1.80
  -1   3   1   13.80    1.70
   0  -3  -1   69.59    3.70
   0  -3  -1   69.19    3.20
   0  -3  -1   66.09    3.70
   0   3   1   69.29    3.20
   0   3   1   66.19    3.70
   0   3   1   68.79    3.70
  -1  -3  -1  232.08    8.90
  -1  -3  -1  221.88    8.30
  -1  -3  -1  215.98    8.30
   1   3   1  208.88    8.10
   1   3   1  202.58    8.50
   1   3   1  223.38    8.70
  -2  -3  -1  215.28    8.20
  -2  -3  -1  187.78    7.60
  -2  -3  -1  222.58    9.50
  -2  -3  -1  213.28    7.90
  -2  -3  -1  203.98    8.30
   2   3   1  210.78    9.60
   2   3   1  222.98    7.80
   2   3   1  208.68    7.90
  -3  -3  -1  192.48    7.80
  -3  -3  -1  177.28    7.60
  -3  -3  -1  180.98    8.20
   3   3   1  198.18    7.70
  -4  -3  -1  468.85   16.20
  -4  -3  -1  490.05   18.50
  -4  -3  -1  461.45   17.50
  -4  -3  -1  499.65   16.40
  -4  -3  -1  488.75   17.70
   4   3   1  502.15   17.60
   4   3   1  455.05   17.70
  -5  -3  -1   97.29    4.90
  -5  -3  -1   91.29    6.70
  -5  -3  -1   90.59    6.30
   5   3   1  106.29    6.80
  -6  -3  -1  155.38    7.30
  -6  -3  -1  161.48    7.10
  -6  -3  -1  145.69    7.10
  -6  -3  -1  147.69    7.00
  -7  -3  -1    1.70    1.60
  -7  -3  -1    1.40    1.70
  -8   3   0    7.50    1.30
  -8   3   0    5.10    1.30
  -7   3   0    6.70    2.10
  -7   3   0    4.60    1.80
  -7   3   0    4.00    1.70
  -6   3   0   82.89    4.80
  -6   3   0   77.59    4.80
  -6   3   0   85.69    5.00
  -6   3   0   89.99    5.10
  -6   3   0   85.99    5.00
  -6   3   0   83.09    5.20
  -6   3   0   74.49    7.00
   5  -3   0  394.26   16.70
  -5   3   0  404.66   16.60
  -5   3   0  391.16   16.70
  -5   3   0  383.66   16.30
  -5   3   0  389.06   14.40
  -5   3   0  408.46   14.20
  -5   3   0  397.46   17.20
   4  -3   0   36.30    4.00
  -4   3   0   32.40    4.10
  -4   3   0   37.60    4.60
  -4   3   0   30.40    4.00
  -4   3   0   26.90    2.50
  -4   3   0   26.60    3.50
   3  -3   0 1454.15   47.40
  -3   3   0 1456.55   47.60
  -3   3   0 1431.66   47.20
  -3   3   0 1444.76   47.40
  -3   3   0 1450.15   47.50
  -3   3   0 1511.15   48.00
   2  -3   0  386.26   14.40
   2  -3   0  404.56   14.00
   2  -3   0  393.86   15.50
  -2   3   0  391.76   15.00
  -2   3   0  421.56   15.10
  -2   3   0  402.46   14.30
  -2   3   0  407.46   14.00
  -2   3   0  385.66   15.60
  -2   3   0  432.16   14.10
  -2   3   0  390.56   13.90
   1  -3   0 5405.16  162.98
   1  -3   0 5188.78  162.88
   1  -3   0 5125.39  162.48
  -1   3   0 5123.69  162.98
  -1   3   0 5264.07  163.38
  -1   3   0 5192.78  162.98
   0  -3   0    1.40    1.00
   0  -3   0    1.90    1.10
   0  -3   0    1.70    0.70
   0   3   0    0.90    0.70
   0   3   0    1.40    1.00
   0   3   0    0.50    0.90
  -1  -3   0 4879.91  152.78
  -1  -3   0 4837.02  153.48
   1   3   0 5047.10  154.38
   1   3   0 4890.71  153.38
  -2  -3   0  317.27   12.20
  -2  -3   0  346.37   12.20
  -2  -3   0  377.66   12.70
   2   3   0  397.96   14.10
  -3  -3   0 1422.06   45.10
  -3  -3   0 1298.57   45.30
  -3  -3   0 1457.15   45.20
  -3  -3   0 1421.86   45.70
  -4  -3   0   28.20    3.30
  -4  -3   0   29.30    3.10
  -4  -3   0   31.40    3.50
  -4  -3   0   27.40    3.60
   4   3   0   30.00    3.30
  -5  -3   0  369.26   13.00
  -5  -3   0  367.06   15.40
  -5  -3   0  357.96   14.70
   5   3   0  349.87   14.80
  -6  -3   0   75.69    4.60
  -8   3  -1    0.50    1.10
  -8   3  -1   -1.00    1.20
  -8   3  -1    1.10    1.10
  -7   3  -1    0.40    1.60
  -7   3  -1   -1.20    1.70
  -7   3  -1    3.20    1.60
  -7   3  -1    1.40    1.60
  -6   3  -1  151.38    7.10
  -6   3  -1  141.09    6.90
  -6   3  -1  132.09    9.30
  -6   3  -1  142.09    6.80
  -6   3  -1  157.58    7.00
  -6   3  -1  144.89    7.10
  -6   3  -1  160.88    7.10
  -6   3  -1  143.19    6.90
   5  -3   1   93.89    6.80
  -5   3  -1   94.39    6.70
  -5   3  -1   97.99    7.50
  -5   3  -1   99.19    5.20
  -5   3  -1   96.69    5.20
  -5   3  -1   96.29    7.30
  -5   3  -1  105.69    7.00
  -4   3  -1  527.45   19.50
  -4   3  -1  515.95   19.90
  -4   3  -1  509.65   19.20
  -4   3  -1  499.65   17.30
   3  -3   1  194.08    7.90
  -3   3  -1  180.78    8.00
  -3   3  -1  175.18    8.10
  -3   3  -1  173.18    8.30
  -3   3  -1  195.78    8.10
   2  -3   1  222.48    9.20
   2  -3   1  196.38    8.90
   2  -3   1  223.48    8.40
  -2   3  -1  222.08    8.40
  -2   3  -1  229.28    8.80
  -2   3  -1  217.88    9.70
  -2   3  -1  229.38    8.50
   1  -3   1  227.58    8.90
   1  -3   1  218.38    9.10
   1  -3   1  228.38    9.10
  -1   3  -1  225.48    9.20
  -1   3  -1  249.78    9.20
  -1   3  -1  219.28    9.20
   0  -3   1   70.79    3.90
   0  -3   1   71.89    3.90
   0   3  -1   79.49    3.70
   0   3  -1   68.79    3.80
   0   3  -1   79.39    4.00
  -1  -3   1    8.70    1.50
  -1  -3   1   10.90    1.70
   1   3  -1   13.20    1.90
  -2  -3   1  796.52   28.20
  -2  -3   1  886.51   28.40
   2   3  -1  940.51   29.80
  -3  -3   1  764.62   25.40
  -3  -3   1  771.92   25.30
  -3  -3   1  746.83   25.70
  -3  -3   1  758.22   26.20
  -3  -3   1  770.22   25.30
  -4  -3   1   37.10    3.80
  -4  -3   1   29.60    3.30
  -8   3  -2   14.20    1.60
  -8   3  -2   13.90    1.60
  -8   3  -2   15.30    1.70
  -7   3  -2    2.00    1.70
  -7   3  -2    3.30    1.70
  -7   3  -2    3.60    1.70
  -7   3  -2    2.50    1.50
  -7   3  -2    4.80    1.90
  -6   3  -2   36.00    3.50
  -6   3  -2   36.60    3.60
  -6   3  -2   45.00    4.10
  -6   3  -2   39.80    4.00
  -6   3  -2   35.00    3.70
  -6   3  -2   38.80    3.80
   5  -3   2  260.67   12.20
  -5   3  -2  278.77   10.40
  -5   3  -2  262.47   13.20
  -5   3  -2  258.07   12.30
  -5   3  -2  257.57   10.40
  -5   3  -2  259.77   12.20
  -5   3  -2  265.97   12.80
   4  -3   2  160.58    8.40
  -4   3  -2  175.18    8.50
  -4   3  -2  170.98    8.80
  -4   3  -2  166.78    6.90
  -4   3  -2  182.98    9.30
  -4   3  -2  173.68    8.50
   3  -3   2  114.69    6.00
   3  -3   2  117.69    5.60
  -3   3  -2  117.29    6.00
  -3   3  -2  124.59    6.50
  -3   3  -2  112.89    6.00
  -3   3  -2  118.69    6.30
   2  -3   2 3500.55  107.39
   2  -3   2 3491.85  107.69
  -2   3  -2 3369.66  107.39
  -2   3  -2 3438.76  107.49
  -2   3  -2 3344.17  109.49
  -2   3  -2 3426.86  107.99
   1  -3   2  298.47   11.60
   1  -3   2  295.47   11.70
  -1   3  -2  281.47   11.50
  -1   3  -2  282.47   11.60
  -1   3  -2  300.97   11.40
   0  -3   2 2712.13   86.79
   0  -3   2 2729.43   86.69
   0   3  -2 2801.52   86.79
   0   3  -2 2734.13   86.29
   0   3  -2 2723.03   86.79
  -1  -3   2    8.80    1.60
  -1  -3   2    9.60    1.70
   1   3  -2    9.70    1.50
   1   3  -2    8.40    1.40
   1   3  -2    9.50    1.60
  -2  -3   2  566.44   18.80
  -2  -3   2  572.74   18.90
  -2  -3   2  486.75   19.80
   2   3  -2  588.04   19.80
   2   3  -2  589.14   19.90
  -3  -3   2  152.08    7.00
  -3  -3   2  162.88    7.00
  -3  -3   2  179.58    7.40
  -3  -3   2  175.58    7.20
  -8   3  -3    6.60    1.40
  -7   3  -3   32.20    3.20
  -7   3  -3   24.20    2.70
  -7   3  -3   28.90    3.00
  -7   3  -3   27.00    2.80
  -6   3  -3    2.70    2.00
  -6   3  -3    4.70    2.10
  -6   3  -3    4.30    2.00
  -6   3  -3    2.40    1.70
  -6   3  -3    0.90    1.60
   5  -3   3  782.82   27.70
  -5   3  -3  752.52   25.00
  -5   3  -3  732.33   27.20
  -5   3  -3  725.63   28.30
  -5   3  -3  710.23   25.10
  -5   3  -3  751.02   27.30
  -5   3  -3  719.33   27.80
   4  -3   3  702.33   25.30
  -4   3  -3  680.23   23.30
  -4   3  -3  667.13   25.50
  -4   3  -3  735.53   25.40
  -4   3  -3  726.73   26.30
  -4   3  -3  712.13   25.20
   3  -3   3   63.49    4.40
  -3   3  -3   72.99    4.50
  -3   3  -3   71.69    4.80
  -3   3  -3   74.49    4.60
  -3   3  -3   69.49    4.90
   2  -3   3  359.26   12.50
   2  -3   3  345.97   12.70
  -2   3  -3  362.86   12.80
  -2   3  -3  350.66   12.60
  -2   3  -3  348.17   13.10
   1  -3   3   18.40    1.80
   1  -3   3   30.70    3.50
   1  -3   3   18.50    1.90
   1  -3   3   18.50    2.80
  -1   3  -3   24.70    2.80
  -1   3  -3   16.90    2.80
  -1   3  -3   20.90    1.90
  -1   3  -3   21.10    3.00
   0  -3   3 1098.49   36.90
   0  -3   3 1079.19   36.00
   0  -3   3 1137.59   36.90
   0   3  -3 1131.79   36.80
   0   3  -3 1080.09   36.00
   0   3  -3 1092.49   36.80
  -1  -3   3   53.49    3.00
  -1  -3   3   48.80    3.00
  -1  -3   3   55.39    3.40
  -1  -3   3   56.59    3.80
  -1  -3   3   57.89    3.70
   1   3  -3   57.99    3.40
   1   3  -3   53.89    3.50
   1   3  -3   51.79    3.40
  -2  -3   3  706.83   23.20
  -2  -3   3  701.13   23.00
  -2  -3   3  616.74   23.60
  -2  -3   3  668.33   23.10
   2   3  -3  727.63   23.70
   2   3  -3  712.83   23.50
  -3  -3   3    6.00    1.70
  -3  -3   3    5.80    1.70
  -3  -3   3    7.50    1.90
  -4  -3   3   14.10    2.60
  -4  -3   3   14.70    2.90
  -7   3  -4    1.90    1.40
  -7   3  -4    1.80    1.60
  -7   3  -4    3.70    1.70
  -7   3  -4    2.60    1.70
  -6   3  -4   10.80    2.40
  -6   3  -4   11.30    2.60
  -6   3  -4    9.30    2.20
  -6   3  -4    9.30    2.30
  -6   3  -4    8.60    2.10
  -6   3  -4    6.50    2.10
   5  -3   4   17.10    3.90
   5  -3   4   17.60    4.00
  -5   3  -4   14.60    2.40
  -5   3  -4   19.90    4.40
  -5   3  -4   16.70    3.80
  -5   3  -4   19.20    2.70
  -5   3  -4   11.60    3.10
   4  -3   4   -0.60    2.00
  -4   3  -4    0.20    1.70
  -4   3  -4   -0.90    2.10
  -4   3  -4    4.00    2.00
  -4   3  -4    1.10    2.10
  -4   3  -4    0.40    1.20
   3  -3   4   -0.10    1.30
  -3   3  -4    0.40    1.50
  -3   3  -4    0.40    1.50
  -3   3  -4    0.20    1.40
  -3   3  -4   -0.70    1.30
   2  -3   4 1159.08   37.30
   2  -3   4 1142.09   37.60
  -2   3  -4 1172.48   37.60
  -2   3  -4 1141.69   37.40
  -2   3  -4 1145.79   38.00
  -2   3  -4 1156.98   38.00
   1  -3   4  243.48   11.70
   1  -3   4  253.97   14.90
   1  -3   4  262.37    9.70
   1  -3   4  271.97    9.80
  -1   3  -4  258.67   12.10
  -1   3  -4  273.47   12.10
  -1   3  -4  281.87    9.90
  -1   3  -4  277.47   11.40
  -1   3  -4  288.87    9.70
   0  -3   4  709.93   25.90
   0  -3   4  732.83   23.90
   0  -3   4  746.53   26.10
   0  -3   4  663.53   24.70
   0   3  -4  725.63   25.80
   0   3  -4  767.62   26.00
   0   3  -4  754.02   24.90
  -1  -3   4    9.50    1.50
  -1  -3   4   12.80    1.90
  -1  -3   4    8.50    1.70
   1   3  -4    8.70    1.70
   1   3  -4    8.60    1.90
   1   3  -4    9.90    2.10
  -2  -3   4    3.50    1.50
  -2  -3   4    3.40    1.30
  -2  -3   4    1.40    1.10
  -3  -3   4   34.80    3.40
  -3  -3   4   31.50    3.20
  -3  -3   4   30.70    3.20
  -4  -3   4  178.28    9.00
  -4  -3   4  176.98    8.40
  -4  -3   4  176.78    7.20
  -4  -3   4  175.18    9.00
   4   3  -4  175.58    8.70
  -7   3  -5   63.29    3.70
  -7   3  -5   69.49    4.00
  -7   3  -5   66.49    3.90
  -7   3  -5   69.39    4.10
  -7   3  -5   68.29    3.90
  -6   3  -5   56.49    4.20
  -6   3  -5   56.79    4.20
  -6   3  -5   56.29    4.30
  -6   3  -5   58.59    4.20
  -6   3  -5   60.29    4.20
  -6   3  -5   65.19    4.40
   5  -3   5    0.00    2.60
   5  -3   5    0.00    2.80
  -5   3  -5    0.70    2.50
  -5   3  -5   -0.30    1.60
  -5   3  -5    1.20    2.30
  -5   3  -5    3.00    2.50
  -5   3  -5    0.50    3.00
  -5   3  -5   -0.40    1.40
   4  -3   5   -2.80    2.00
   4  -3   5   -0.70    1.30
   4  -3   5    0.20    2.10
  -4   3  -5    0.10    1.90
  -4   3  -5    1.20    2.50
  -4   3  -5    1.00    2.40
  -4   3  -5    0.30    1.30
  -4   3  -5    4.10    1.30
   3  -3   5    2.20    1.60
   3  -3   5    3.50    1.20
   3  -3   5    5.00    2.00
  -3   3  -5    5.20    1.30
  -3   3  -5    2.40    1.00
  -3   3  -5    1.60    1.70
  -3   3  -5    4.60    2.00
  -3   3  -5    1.10    1.70
   2  -3   5  363.86   13.60
   2  -3   5  369.66   13.80
  -2   3  -5  386.96   14.20
  -2   3  -5  375.66   13.50
  -2   3  -5  373.36   14.20
   1  -3   5  490.65   21.10
   1  -3   5  531.65   18.30
   1  -3   5  544.25   18.40
   1  -3   5  523.75   18.20
  -1   3  -5  561.84   17.90
  -1   3  -5  565.94   19.00
  -1   3  -5  550.84   20.40
   0  -3   5  222.78   10.70
   0  -3   5  213.68    7.90
   0  -3   5  211.28    8.00
   0  -3   5  210.08    8.20
   0   3  -5  198.58   10.00
   0   3  -5  194.78    7.90
   0   3  -5  210.98    9.10
  -1  -3   5   73.79    4.00
  -1  -3   5   77.09    3.90
  -1  -3   5   69.79    4.20
  -2  -3   5  153.78    7.10
  -2  -3   5  158.38    6.70
  -2  -3   5  143.89    6.70
  -2  -3   5  141.59    7.30
   2   3  -5  142.59    6.60
  -3  -3   5   25.10    3.10
  -3  -3   5   21.40    2.80
  -3  -3   5   27.30    3.70
   3   3  -5   24.80    3.10
  -4  -3   5  104.99    6.10
  -4  -3   5   92.09    4.90
  -4  -3   5   89.99    6.60
  -4  -3   5  109.29    6.30
   4   3  -5   97.59    6.30
   7  -3   6    2.90    1.40
  -7   3  -6    3.60    1.60
  -7   3  -6    2.90    1.30
  -7   3  -6    6.80    1.60
  -7   3  -6    4.80    1.40
  -7   3  -6    3.40    1.40
  -6   3  -6    0.60    1.60
  -6   3  -6   -1.30    1.50
  -6   3  -6    2.10    1.60
  -6   3  -6   -2.80    1.30
  -6   3  -6    4.50    1.80
  -6   3  -6   -0.30    1.40
  -5   3  -6  148.39    7.00
  -5   3  -6  147.69    7.00
  -5   3  -6  151.78    7.20
  -5   3  -6  144.89    7.00
  -5   3  -6  161.58    7.00
  -5   3  -6  138.99    7.10
   4  -3   6    2.60    2.10
   4  -3   6    0.90    2.30
   4  -3   6    2.20    1.30
  -4   3  -6    4.90    2.90
  -4   3  -6    1.80    2.40
  -4   3  -6   -1.80    1.40
  -4   3  -6    1.90    2.20
  -4   3  -6    0.60    1.40
   3  -3   6  230.58    8.50
   3  -3   6  235.78   10.20
   3  -3   6  224.68    9.90
  -3   3  -6  243.18   10.90
  -3   3  -6  205.48    8.40
  -3   3  -6  224.28    9.80
  -3   3  -6  214.68   10.40
   2  -3   6  293.97   11.90
   2  -3   6  285.77   11.60
  -2   3  -6  319.17   12.60
  -2   3  -6  314.97   11.50
  -2   3  -6  307.67   12.30
   1  -3   6    2.40    1.30
   1  -3   6    2.80    1.50
  -1   3  -6    1.30    1.30
   0  -3   6  145.09    6.40
   0  -3   6  140.79    6.00
   0  -3   6  133.59    6.10
   0   3  -6  139.59    6.10
   0   3  -6  138.09    6.20
  -1  -3   6  316.47   12.10
  -1  -3   6  313.37   11.70
  -1  -3   6  303.67   11.60
  -1  -3   6  333.17   11.90
   1   3  -6  316.37   11.70
   1   3  -6  301.07   11.90
  -2  -3   6   16.00    2.50
  -2  -3   6   12.90    2.20
   2   3  -6   11.70    2.40
   2   3  -6   19.60    2.60
  -3  -3   6    2.20    1.80
  -3  -3   6    4.10    2.00
  -3  -3   6    4.40    1.50
  -3  -3   6    3.00    1.90
   3   3  -6    6.60    2.20
   3   3  -6    3.70    1.90
  -4  -3   6    9.40    3.10
  -4  -3   6    7.40    1.80
  -4  -3   6    7.70    2.40
  -4  -3   6    6.40    2.40
   4   3  -6    6.50    2.40
   4   3  -6    9.80    2.70
  -5  -3   6   78.49    4.70
  -5  -3   6   71.19    7.10
   7  -3   7   22.00    2.00
  -7   3  -7   27.10    2.20
  -7   3  -7   25.70    2.40
  -7   3  -7   25.10    2.20
  -7   3  -7   26.10    2.30
  -7   3  -7   26.40    2.30
  -6   3  -7   -0.30    1.30
  -6   3  -7    2.30    1.70
  -6   3  -7    2.30    1.60
  -6   3  -7    0.30    1.50
  -6   3  -7    2.50    1.50
  -6   3  -7    0.30    1.40
   5  -3   7   11.20    2.10
  -5   3  -7   20.20    2.60
  -5   3  -7   18.50    2.70
  -5   3  -7   11.90    2.40
  -5   3  -7   15.40    2.40
  -5   3  -7   15.60    2.40
  -5   3  -7   11.10    2.20
  -5   3  -7   17.60    2.60
   4  -3   7  123.89    8.10
   4  -3   7  149.88    8.50
   4  -3   7  134.29    6.10
  -4   3  -7  133.79    6.60
  -4   3  -7  142.29    6.30
  -4   3  -7  126.59    8.50
  -4   3  -7  137.49    8.10
  -4   3  -7  142.19    9.10
   3  -3   7   17.30    3.20
   3  -3   7   17.40    2.10
   3  -3   7   17.70    3.50
  -3   3  -7   16.50    3.60
  -3   3  -7   17.00    3.10
   2  -3   7   14.90    2.70
   2  -3   7   11.40    1.60
  -2   3  -7   15.80    3.10
   1  -3   7    0.80    1.40
  -1   3  -7   -0.10    1.40
   0  -3   7    3.50    1.60
   0  -3   7    1.20    1.40
   0  -3   7    4.50    1.50
   0   3  -7    2.20    1.40
   0   3  -7    5.10    1.80
  -1  -3   7  181.38    8.10
  -1  -3   7  187.98    8.20
  -1  -3   7  179.68    8.40
   1   3  -7  193.58    8.40
   1   3  -7  193.88    8.20
  -2  -3   7  252.77   10.90
  -2  -3   7  239.38   10.10
  -2  -3   7  246.78   10.30
   2   3  -7  243.38   10.10
   2   3  -7  229.98   10.40
  -3  -3   7   63.19    5.40
  -3  -3   7   58.69    3.70
  -3  -3   7   60.29    4.80
  -3  -3   7   59.69    4.80
   3   3  -7   49.80    4.40
   3   3  -7   61.59    5.00
  -4  -3   7  213.98   10.30
  -4  -3   7  211.78   11.40
  -4  -3   7  229.58   10.70
  -4  -3   7  235.88    9.10
  -4  -3   7  201.98    8.30
   4   3  -7  208.38   10.20
   4   3  -7  194.78   10.40
  -5  -3   7    3.90    2.00
  -5  -3   7    1.30    1.60
  -5  -3   7   -1.00    1.90
  -5  -3   7    1.90    4.90
  -5  -3   7   -1.10    1.70
  -6  -3   7   56.59    4.00
  -6  -3   7   64.69    4.50
  -6   3  -8    4.20    1.60
  -6   3  -8    3.70    1.60
  -6   3  -8    2.50    1.50
  -6   3  -8    1.20    1.40
  -6   3  -8    6.10    1.70
   5  -3   8   26.90    2.80
   5  -3   8   23.70    2.70
  -5   3  -8   24.90    2.80
  -5   3  -8   16.70    2.60
  -5   3  -8   15.70    3.60
  -5   3  -8   20.30    2.70
  -5   3  -8   18.70    2.60
  -5   3  -8   23.70    2.70
   4  -3   8  120.79    5.90
   4  -3   8  121.29    5.70
  -4   3  -8  117.29    6.10
  -4   3  -8  113.49    6.10
  -4   3  -8  107.39    6.00
  -4   3  -8  117.39    6.00
  -4   3  -8  115.59    5.90
  -4   3  -8  113.99    8.60
   3  -3   8   -0.10    1.20
   3  -3   8    0.60    2.20
  -3   3  -8    3.80    2.60
  -3   3  -8    3.00    1.70
   2  -3   8    6.30    1.50
   2  -3   8    6.80    2.50
  -2   3  -8    6.10    2.50
   1  -3   8  108.09    6.10
   1  -3   8  107.89    4.80
  -1   3  -8  105.99    6.30
   0  -3   8 1021.30   34.10
   0  -3   8  985.70   33.80
   0  -3   8 1007.00   33.20
   0   3  -8 1013.30   34.00
  -1  -3   8  257.97   10.50
  -1  -3   8  255.47   10.90
  -1  -3   8  229.58   10.40
   1   3  -8  258.57   10.40
   1   3  -8  237.68   10.40
  -2  -3   8  110.99    6.40
  -2  -3   8  101.49    6.10
  -2  -3   8   95.29    6.50
  -2  -3   8  109.09    5.20
   2   3  -8  106.19    6.10
   2   3  -8  117.59    6.60
  -3  -3   8   31.40    3.10
  -3  -3   8   36.60    5.00
  -3  -3   8   31.80    4.10
  -3  -3   8   31.30    4.00
   3   3  -8   33.00    4.20
   3   3  -8   36.30    4.20
  -4  -3   8   65.89    7.40
  -4  -3   8   59.19    5.60
  -4  -3   8   72.29    6.20
  -4  -3   8   62.69    3.90
  -4  -3   8   62.09    4.40
   4   3  -8   64.29    5.60
   4   3  -8   60.29    5.90
  -5  -3   8   49.80    4.10
  -5  -3   8   49.30    4.60
  -5  -3   8   58.59    4.20
  -5  -3   8   51.09    4.00
  -5  -3   8   50.59    3.60
  -5  -3   8   42.30    4.10
   5   3  -8   53.59    5.80
  -6  -3   8    8.10    2.10
  -6  -3   8    7.80    1.90
  -6  -3   8    4.60    1.70
   6  -3   9   18.40    2.00
   6  -3   9   17.50    2.10
  -6   3  -9   11.40    1.70
  -6   3  -9   17.90    1.90
  -6   3  -9   17.90    2.00
  -6   3  -9   12.70    1.90
  -6   3  -9   16.00    2.00
   5  -3   9   61.19    3.60
   5  -3   9   45.40    3.80
  -5   3  -9   45.40    3.60
  -5   3  -9   49.99    3.80
  -5   3  -9   45.80    3.70
  -5   3  -9   52.89    3.80
   4  -3   9  102.19    5.30
   4  -3   9   90.69    5.20
  -4   3  -9  107.59    5.70
  -4   3  -9  109.09    5.70
  -4   3  -9  102.89    5.60
  -4   3  -9   96.89    5.30
   3  -3   9  227.98    8.70
   3  -3   9  215.08   10.80
  -3   3  -9  194.58    8.80
  -3   3  -9  212.28   11.50
   2  -3   9    1.30    2.10
   2  -3   9    1.30    1.30
  -2   3  -9    5.30    2.70
  -2   3  -9    2.60    1.60
   1  -3   9   60.99    3.50
   1  -3   9   64.39    5.10
  -1   3  -9   66.39    5.30
   0  -3   9  114.59    8.00
   0  -3   9  121.39    5.20
   0  -3   9  116.89    6.60
   0   3  -9  120.19    6.70
  -1  -3   9  110.69    6.80
  -1  -3   9  103.29    5.30
   1   3  -9  110.59    6.30
   1   3  -9  114.09    6.60
  -2  -3   9   -0.90    1.90
  -2  -3   9    0.30    1.40
  -2  -3   9    0.00    1.90
   2   3  -9    1.60    1.90
   2   3  -9    1.40    2.00
  -3  -3   9    9.30    2.90
  -3  -3   9    7.30    1.90
  -3  -3   9   12.60    1.90
  -3  -3   9   10.00    3.10
  -3  -3   9   13.40    3.40
   3   3  -9   14.80    3.40
   3   3  -9   11.00    2.90
  -4  -3   9  166.88    9.90
  -4  -3   9  184.48    9.60
  -4  -3   9  171.68    7.90
  -4  -3   9  160.38   10.50
  -4  -3   9  175.58    7.30
   4   3  -9  166.68    9.80
   4   3  -9  164.28    9.10
  -5  -3   9   13.60    2.50
  -5  -3   9   10.60    3.40
  -5  -3   9   12.00    2.00
  -5  -3   9   14.60    2.90
  -5  -3   9   10.60    2.30
  -5  -3   9   15.70    2.70
  -5  -3   9   13.00    2.50
  -5  -3   9   13.00    2.10
   5   3  -9   14.30    3.40
  -6  -3   9   19.80    2.40
  -6  -3   9   25.60    2.80
  -6  -3   9   15.50    2.40
  -6  -3   9   20.90    2.40
   6  -3  10   -0.50    1.10
   6  -3  10    1.60    1.30
  -6   3 -10   -0.10    1.10
  -6   3 -10    1.20    1.10
  -6   3 -10    1.90    1.40
  -6   3 -10   -0.90    1.00
   5  -3  10    4.90    1.80
   5  -3  10    3.50    1.70
  -5   3 -10    4.20    1.60
  -5   3 -10    2.90    1.60
  -5   3 -10    3.70    1.60
   4  -3  10    4.70    1.60
   4  -3  10    8.60    2.10
  -4   3 -10    6.90    1.90
  -4   3 -10    5.10    1.90
  -4   3 -10    8.00    1.90
   3  -3  10    8.80    2.00
   3  -3  10   10.50    2.40
   3  -3  10    6.70    1.80
  -3   3 -10    5.30    1.80
  -3   3 -10    7.00    2.00
  -3   3 -10    7.50    1.90
  -3   3 -10    5.70    1.90
  -3   3 -10    6.60    1.90
  -3   3 -10    4.40    3.20
   2  -3  10    5.60    2.90
   2  -3  10    5.60    1.70
  -2   3 -10    7.70    3.30
  -2   3 -10    1.60    1.70
   1  -3  10    6.30    2.80
   1  -3  10    9.50    1.90
  -1   3 -10    7.70    2.70
  -1   3 -10   11.20    1.90
   0  -3  10   67.49    4.00
   0  -3  10   79.49    5.80
   0   3 -10   76.39    4.10
   0   3 -10   74.49    5.70
  -1  -3  10    8.00    2.90
  -1  -3  10    7.90    1.60
   1   3 -10    9.10    1.70
   1   3 -10    6.40    2.50
   1   3 -10    6.80    2.40
  -2  -3  10   -0.50    1.40
  -2  -3  10    4.50    2.90
  -2  -3  10    0.10    1.20
   2   3 -10   -0.80    1.20
   2   3 -10    3.80    2.30
   2   3 -10    0.20    1.90
  -3  -3  10    3.80    1.50
  -3  -3  10    3.70    1.70
  -3  -3  10    1.30    2.90
   3   3 -10    0.90    2.60
   3   3 -10    2.40    2.30
  -4  -3  10   12.80    2.50
  -4  -3  10   19.20    2.80
  -4  -3  10   14.20    2.40
  -4  -3  10   14.30    3.00
  -4  -3  10   14.00    2.60
  -4  -3  10   17.60    2.70
  -4  -3  10   13.90    2.10
  -4  -3  10   13.10    2.10
   4   3 -10   11.20    3.30
  -5  -3  10    9.30    1.80
  -5  -3  10    9.80    1.80
  -5  -3  10    9.80    2.30
  -5  -3  10    9.70    2.20
  -5  -3  10   10.30    2.30
  -5  -3  10   13.50    2.30
  -5  -3  10   10.20    2.50
  -6  -3  10   23.00    2.60
  -6  -3  10   18.50    2.30
  -6  -3  10   21.70    2.40
   5  -3  11    0.50    1.40
   5  -3  11    1.60    1.50
  -5   3 -11    3.10    1.30
  -5   3 -11    2.50    1.40
  -5   3 -11   -0.60    1.30
  -5   3 -11    0.70    1.20
   4  -3  11    0.40    1.50
   4  -3  11   -1.00    1.70
   4  -3  11   -1.00    1.70
  -4   3 -11    0.10    1.40
  -4   3 -11    1.00    1.50
  -4   3 -11    1.00    1.60
  -4   3 -11   -0.80    1.30
   3  -3  11  140.29    6.20
   3  -3  11  128.19    6.30
   3  -3  11  122.79    6.00
  -3   3 -11  119.69    6.10
  -3   3 -11  126.99    6.30
  -3   3 -11  118.39    5.90
  -3   3 -11  131.49    5.80
  -3   3 -11  116.89    8.70
   2  -3  11   51.39    4.00
   2  -3  11   46.00    4.10
   2  -3  11   49.70    3.80
  -2   3 -11   56.99    4.10
  -2   3 -11   50.39    3.40
  -2   3 -11   51.69    3.90
  -2   3 -11   56.29    6.50
  -2   3 -11   52.99    3.80
   1  -3  11   35.00    3.20
   1  -3  11   25.70    4.50
  -1   3 -11   38.10    3.30
  -1   3 -11   36.40    4.90
   0  -3  11  282.97   10.30
   0   3 -11  275.97   10.30
   0   3 -11  235.98   12.20
  -1  -3  11    9.20    1.80
   1   3 -11   12.10    3.10
   1   3 -11   11.40    1.90
  -2  -3  11   19.80    4.10
  -2  -3  11   20.00    2.50
  -2  -3  11   14.30    2.50
   2   3 -11   25.90    4.00
   2   3 -11   22.60    2.50
   2   3 -11   22.10    4.20
  -3  -3  11   15.50    2.50
  -3  -3  11   12.40    2.50
  -3  -3  11   15.70    2.90
  -3  -3  11   15.50    2.40
  -3  -3  11   17.90    2.30
  -3  -3  11   20.00    3.00
  -3  -3  11   20.60    2.30
  -3  -3  11   21.60    2.90
   3   3 -11   10.40    1.90
   3   3 -11   13.70    3.30
  -4  -3  11    5.60    1.60
  -4  -3  11    6.60    1.90
  -4  -3  11    9.50    2.30
  -4  -3  11   10.50    1.90
  -4  -3  11    8.10    2.50
  -4  -3  11   10.30    2.20
  -4  -3  11   10.10    2.40
  -4  -3  11    8.80    2.30
   4   3 -11    4.00    2.70
   4   3 -11    7.00    1.70
  -5  -3  11   34.90    3.30
  -5  -3  11   38.30    2.90
  -5  -3  11   39.60    3.30
  -5  -3  11   37.90    3.50
  -5  -3  11   33.00    3.50
  -5  -3  11   35.70    3.20
  -5  -3  11   40.30    2.80
   5   3 -11   35.20    2.80
  -6  -3  11   20.10    2.20
  -6  -3  11   21.20    2.10
  -6  -3  11   18.40    2.10
  -6  -3  11   17.00    2.20
   5  -3  12    4.90    1.30
   5  -3  12    5.40    1.30
  -5   3 -12    5.40    1.20
  -5   3 -12    6.40    1.20
  -5   3 -12    6.70    1.30
   4  -3  12   67.09    4.10
   4  -3  12   64.69    4.40
  -4   3 -12   61.19    3.70
  -4   3 -12   57.99    3.40
  -4   3 -12   60.09    4.00
  -4   3 -12   67.29    3.80
   3  -3  12  197.08    8.10
   3  -3  12  179.98    7.80
   3  -3  12  184.38    7.70
  -3   3 -12  189.58    7.40
  -3   3 -12  191.28    8.00
  -3   3 -12  172.68    7.60
  -3   3 -12  184.18    7.90
   2  -3  12   80.79    4.90
   2  -3  12   84.39    5.00
   2  -3  12   82.59    4.80
  -2   3 -12   69.79    6.90
  -2   3 -12   88.29    5.00
  -2   3 -12   88.59    4.70
  -2   3 -12   89.09    4.30
  -2   3 -12   88.89    5.00
   1  -3  12  130.39    6.50
   1  -3  12  130.49    5.40
   1  -3  12  129.39    6.50
   1  -3  12  134.19    6.20
  -1   3 -12  132.09    5.20
  -1   3 -12  131.29    6.00
  -1   3 -12  131.39    8.70
  -1   3 -12  141.09    6.40
   0  -3  12   36.40    3.00
   0  -3  12   37.80    3.60
   0  -3  12   35.60    3.50
   0  -3  12   38.30    3.10
   0  -3  12   41.70    3.50
   0   3 -12   42.70    3.40
   0   3 -12   40.10    3.20
   0   3 -12   37.00    4.90
  -1  -3  12    9.50    2.40
  -1  -3  12    6.00    1.80
  -1  -3  12   10.50    2.30
  -1  -3  12    9.10    1.80
   1   3 -12    7.70    2.90
   1   3 -12    8.20    2.00
   1   3 -12   11.00    2.00
  -2  -3  12    3.40    1.90
  -2  -3  12    6.60    2.10
  -2  -3  12    5.40    2.30
  -2  -3  12    6.20    2.20
  -2  -3  12    4.70    1.60
  -2  -3  12    2.70    1.60
   2   3 -12    3.90    2.60
   2   3 -12    2.40    1.40
  -3  -3  12   23.60    3.00
  -3  -3  12   23.20    2.70
  -3  -3  12   26.00    3.20
  -3  -3  12   25.50    2.60
  -3  -3  12   28.50    3.60
  -3  -3  12   25.20    3.20
  -3  -3  12   25.80    2.70
  -3  -3  12   26.10    3.00
   3   3 -12   29.00    4.40
   3   3 -12   27.60    2.80
  -4  -3  12    1.40    1.60
  -4  -3  12    4.70    1.50
  -4  -3  12    2.50    1.60
  -4  -3  12    5.80    2.30
  -4  -3  12    2.90    1.50
  -4  -3  12    4.20    1.80
  -4  -3  12    7.10    2.00
   4   3 -12    2.80    1.50
  -5  -3  12  110.89    5.60
  -5  -3  12  110.39    5.20
  -5  -3  12  110.99    5.30
  -5  -3  12   95.49    4.80
  -5  -3  12  127.59    4.80
  -5  -3  12  110.79    5.20
   5   3 -12  109.09    4.90
  -6  -3  12  125.19    5.20
  -6  -3  12  126.89    5.10
  -6  -3  12  127.39    5.20
  -6  -3  12  133.39    5.10
   4  -3  13   20.90    2.10
  -4   3 -13   20.20    1.90
   3  -3  13    1.80    1.60
   3  -3  13    3.80    1.80
   3  -3  13    4.40    1.60
  -3   3 -13    3.60    1.80
  -3   3 -13    5.20    1.30
   2  -3  13   95.69    5.30
   2  -3  13  100.49    5.20
   2  -3  13  112.69    5.60
  -2   3 -13  100.29    5.20
  -2   3 -13  102.79    4.30
  -2   3 -13  109.39    5.50
   1  -3  13   42.10    3.80
   1  -3  13   39.60    3.50
   1  -3  13   41.00    3.70
  -1   3 -13   33.50    5.10
  -1   3 -13   46.70    3.60
  -1   3 -13   35.00    3.20
   0  -3  13   11.30    2.00
   0  -3  13    9.20    2.30
   0  -3  13   13.20    2.40
   0  -3  13   10.10    2.00
   0   3 -13   12.70    2.00
   0   3 -13   13.10    3.60
   0   3 -13   12.00    2.10
  -1  -3  13  495.55   17.80
  -1  -3  13  536.65   18.50
  -1  -3  13  522.35   18.10
  -1  -3  13  519.65   17.70
  -1  -3  13  513.55   18.30
   1   3 -13  533.95   17.80
   1   3 -13  519.15   18.10
   1   3 -13  498.45   20.60
  -2  -3  13   54.39    4.40
  -2  -3  13   52.19    4.30
  -2  -3  13   50.79    4.00
  -2  -3  13   47.40    4.20
  -2  -3  13   50.39    3.50
  -2  -3  13   54.59    3.70
   2   3 -13   51.09    3.60
   2   3 -13   58.19    3.50
   2   3 -13   51.39    5.60
  -3  -3  13  253.67    9.90
  -3  -3  13  251.37   10.00
  -3  -3  13  273.87    9.70
  -3  -3  13  268.57   10.50
  -3  -3  13  271.77   10.90
  -3  -3  13  259.37   10.20
  -3  -3  13  250.77   10.10
  -3  -3  13  255.17    9.90
   3   3 -13  261.47    9.80
  -4  -3  13   13.80    2.40
  -4  -3  13    8.40    1.80
  -4  -3  13    8.50    2.20
  -4  -3  13    7.50    2.20
  -4  -3  13    9.40    1.70
  -4  -3  13    8.50    1.70
  -4  -3  13    8.50    2.00
  -4  -3  13   11.60    1.70
   4   3 -13   10.00    1.70
  -5  -3  13   -0.20    1.00
  -5  -3  13   -0.10    1.20
  -5  -3  13   -1.00    1.20
  -5  -3  13   -0.80    1.20
  -5  -3  13   -0.40    1.50
  -5  -3  13    1.60    1.40
   4  -3  14    2.80    1.20
   3  -3  14    9.30    1.70
   3  -3  14    9.30    1.70
   2  -3  14   49.70    3.40
   2  -3  14   51.79    3.70
  -2   3 -14   51.69    3.50
  -2   3 -14   40.90    3.10
   1  -3  14   45.40    3.70
   1  -3  14   39.20    3.30
  -1   3 -14   41.20    3.40
  -1   3 -14   45.80    3.20
   0  -3  14   23.90    2.30
   0  -3  14   19.60    2.70
   0  -3  14   23.80    2.50
   0  -3  14   20.30    2.80
   0   3 -14   21.20    2.40
   0   3 -14   16.60    2.40
  -1  -3  14    3.60    1.90
  -1  -3  14    5.10    2.00
  -1  -3  14    2.30    1.40
  -1  -3  14    2.70    1.50
   1   3 -14    4.50    1.60
   1   3 -14    4.90    1.70
  -2  -3  14   26.90    3.00
  -2  -3  14   18.10    2.50
  -2  -3  14   25.10    2.60
  -2  -3  14   22.10    2.90
  -2  -3  14   24.70    2.40
   2   3 -14   23.30    2.50
   2   3 -14   22.40    2.50
  -3  -3  14   13.50    2.30
  -3  -3  14   13.70    2.40
  -3  -3  14   13.20    1.80
  -3  -3  14   15.30    2.10
  -3  -3  14   12.40    2.00
   3   3 -14    9.10    1.70
   3   3 -14   11.90    1.80
  -4  -3  14    3.90    1.30
  -4  -3  14    5.20    1.40
  -4  -3  14    3.60    1.60
  -4  -3  14    3.00    1.40
  -4  -3  14    4.40    1.70
  -4  -3  14    4.20    1.30
  -4  -3  14    7.10    1.50
   4   3 -14    4.20    1.30
   4   3 -14    2.00    1.10
  -5  -3  14    1.50    1.00
  -5  -3  14    0.00    1.00
  -5  -3  14    0.80    0.80
  -5  -3  14    0.80    1.00
   5   3 -14    0.50    0.80
   3  -3  15   38.30    2.40
   3  -3  15   48.80    3.00
   2  -3  15    3.60    1.50
   2  -3  15    4.70    1.40
  -2   3 -15    6.30    1.40
   1  -3  15    2.50    1.60
  -1   3 -15    0.90    1.50
  -1   3 -15    1.00    1.30
   0  -3  15   57.59    3.80
   0  -3  15   56.29    3.80
   0   3 -15   54.19    3.30
   0   3 -15   51.79    3.50
  -1  -3  15   64.09    3.50
  -1  -3  15   68.59    4.20
  -1  -3  15   68.89    4.20
  -1  -3  15   66.99    3.70
   1   3 -15   68.29    3.70
   1   3 -15   63.49    3.90
  -2  -3  15    4.50    1.50
  -2  -3  15    2.60    1.30
  -2  -3  15    1.10    1.50
  -2  -3  15    3.70    1.70
   2   3 -15    3.70    1.50
   2   3 -15    3.90    1.30
  -3  -3  15    2.30    1.50
  -3  -3  15    2.10    1.10
  -3  -3  15    0.60    1.40
  -3  -3  15    5.20    1.40
   3   3 -15    1.00    1.20
   3   3 -15    2.50    1.20
  -4  -3  15    6.10    1.20
  -4  -3  15    6.40    1.10
  -4  -3  15    5.90    1.30
  -4  -3  15    5.30    1.40
  -4  -3  15    5.00    1.30
   4   3 -15    4.50    1.10
   2  -3  16    4.90    1.20
   1  -3  16   11.50    1.70
  -1   3 -16   13.30    1.50
   0  -3  16   22.40    2.20
   0  -3  16   21.80    2.20
   0   3 -16   28.20    2.20
  -1  -3  16   -0.20    1.20
  -1  -3  16    1.60    1.40
   1   3 -16    0.50    1.00
   1   3 -16    0.80    1.20
  -2  -3  16   -1.00    1.10
  -2  -3  16    0.80    1.00
  -2  -3  16    1.90    1.20
   2   3 -16   -1.30    1.00
  -3  -3  16    0.50    0.90
  -3  -3  16   -0.50    1.00
  -3  -3  16   -1.30    1.10
   3   3 -16    0.10    0.90
  -3   4  16    2.00    1.20
  -3   4  16    3.50    1.00
  -2   4  16   59.29    3.40
  -2   4  16   59.59    3.50
  -2   4  16   63.59    2.80
  -1   4  16    1.90    1.40
   0   4  16   20.10    2.20
  -1  -4 -16    2.60    1.20
   1   4  16    1.10    1.30
   1   4  16    3.60    1.20
   4  -4 -15    5.80    1.10
  -4   4  15    4.10    1.10
  -4   4  15    5.30    1.10
  -4   4  15    6.80    1.00
  -4   4  15    5.80    1.40
   3  -4 -15    0.20    1.00
  -3   4  15   -0.20    1.30
  -3   4  15    2.50    1.00
  -3   4  15    1.10    1.40
  -3   4  15    7.30    1.50
   2  -4 -15   68.99    3.50
  -2   4  15   68.19    4.20
  -2   4  15   72.09    3.50
  -2   4  15   64.89    4.20
  -2   4  15   67.29    3.50
  -1   4  15   67.59    4.30
  -1   4  15   69.19    3.30
  -1   4  15   73.09    4.30
   0  -4 -15   41.70    3.00
   0   4  15   37.40    3.40
   0   4  15   40.10    3.20
  -1  -4 -15  149.79    6.30
   1   4  15  155.48    6.50
   1   4  15  163.08    6.70
  -2  -4 -15    2.70    1.30
   2   4  15    6.10    1.50
   2   4  15    8.30    2.00
  -3  -4 -15   16.30    1.60
   3   4  15   13.00    1.50
  -5   4  14    8.10    1.10
  -5   4  14    4.10    1.10
   4  -4 -14    4.80    1.30
  -4   4  14    1.80    1.00
  -4   4  14    2.50    1.20
  -4   4  14    1.30    1.30
  -4   4  14    2.90    1.60
   3  -4 -14   16.50    1.90
  -3   4  14   16.30    2.40
  -3   4  14   18.80    1.90
  -3   4  14   15.40    2.30
  -3   4  14   21.10    3.00
  -3   4  14   17.20    2.00
   2  -4 -14    0.10    1.20
   2  -4 -14   -0.20    1.20
  -2   4  14    0.70    1.30
  -2   4  14    1.70    1.80
  -2   4  14   -1.30    1.20
  -2   4  14   -0.30    1.70
  -2   4  14    1.30    1.50
   1  -4 -14   96.09    4.90
  -1   4  14  106.69    4.80
  -1   4  14  101.79    5.70
  -1   4  14  104.79    5.50
   0  -4 -14   -0.20    1.30
   0   4  14   -0.80    1.70
   0   4  14   -1.70    1.60
   0   4  14    0.10    1.00
  -1  -4 -14    3.30    1.50
   1   4  14    2.30    1.90
   1   4  14    3.90    1.80
  -2  -4 -14   90.89    4.70
   2   4  14   91.19    4.80
   2   4  14   98.79    4.90
  -3  -4 -14   37.50    2.10
  -3  -4 -14   38.10    2.90
   3   4  14   39.80    3.00
  -4  -4 -14    0.90    0.90
   5  -4 -13    9.70    1.50
  -5   4  13    6.80    1.70
  -5   4  13    9.20    1.60
  -5   4  13    6.90    1.40
  -5   4  13   12.20    1.50
  -5   4  13    7.40    1.60
  -5   4  13    7.40    1.50
   4  -4 -13    5.40    1.50
  -4   4  13    4.50    1.80
  -4   4  13    9.20    1.60
  -4   4  13    6.60    1.50
  -4   4  13    5.00    1.60
  -4   4  13    7.70    1.90
  -4   4  13    6.70    1.70
   3  -4 -13    0.30    1.30
  -3   4  13    0.40    1.90
  -3   4  13    1.30    1.40
  -3   4  13    0.80    1.30
  -3   4  13   -5.00    1.40
  -3   4  13    0.90    2.00
  -3   4  13   -0.80    1.60
   2  -4 -13    1.10    1.40
  -2   4  13   -0.60    1.30
  -2   4  13   -0.50    1.80
  -2   4  13   -1.70    1.70
  -2   4  13    1.80    1.40
   1  -4 -13    0.90    1.40
  -1   4  13    0.50    1.40
  -1   4  13   -2.20    1.70
  -1   4  13    2.40    1.90
   0  -4 -13   55.39    3.80
   0   4  13   56.99    3.20
   0   4  13   55.79    4.30
   0   4  13   48.50    4.10
  -1  -4 -13  218.08    7.60
  -1  -4 -13  213.18    8.80
   1   4  13  212.88    8.70
   1   4  13  227.48    9.10
  -2  -4 -13    1.50    1.20
  -2  -4 -13    0.30    1.50
   2   4  13   -0.50    1.50
   2   4  13    0.50    1.60
  -3  -4 -13   19.30    2.20
  -3  -4 -13   19.20    2.00
  -3  -4 -13   17.20    2.30
   3   4  13   16.20    2.20
   3   4  13   13.90    2.00
  -4  -4 -13   53.39    3.00
  -4  -4 -13   63.19    3.40
  -4  -4 -13   70.89    3.50
   4   4  13   62.59    3.40
   4   4  13   55.49    3.40
  -6   4  12    0.80    1.00
  -6   4  12   -0.80    0.80
  -6   4  12    0.90    1.00
  -6   4  12    0.80    1.00
  -5   4  12    3.60    1.50
  -5   4  12    5.30    1.60
  -5   4  12    4.00    1.50
  -5   4  12    3.00    1.40
  -5   4  12    0.10    1.50
  -5   4  12    3.30    1.30
  -4   4  12  103.09    5.80
  -4   4  12   93.09    4.60
  -4   4  12   94.49    5.40
  -4   4  12   93.29    5.40
  -4   4  12   93.49    5.00
  -4   4  12   90.39    5.00
  -4   4  12   92.19    4.80
   3  -4 -12   48.40    3.50
   3  -4 -12   40.60    5.20
  -3   4  12   47.90    3.50
  -3   4  12   35.40    4.10
  -3   4  12   41.80    4.20
  -3   4  12   44.10    3.20
  -3   4  12   43.40    4.00
  -3   4  12   42.80    4.30
   2  -4 -12   34.10    4.60
   2  -4 -12   28.60    2.90
   2  -4 -12   27.80    2.80
  -2   4  12   29.90    3.60
  -2   4  12   26.80    3.20
  -2   4  12   26.00    2.50
  -2   4  12   31.20    3.30
  -2   4  12   26.50    2.70
  -2   4  12   26.90    2.70
   1  -4 -12   52.09    3.80
  -1   4  12   51.89    3.60
  -1   4  12   56.69    4.40
  -1   4  12   46.70    4.50
  -1   4  12   57.19    4.80
   0  -4 -12   17.50    2.50
   0   4  12   15.30    2.40
   0   4  12   24.80    2.30
   0   4  12   18.00    2.80
  -1  -4 -12  351.06   12.00
  -1  -4 -12  348.97   12.80
  -1  -4 -12  337.27   12.60
   1   4  12  341.47   12.60
   1   4  12  335.87   12.80
  -2  -4 -12  132.29    6.30
  -2  -4 -12  134.09    5.80
  -2  -4 -12  139.59    6.30
   2   4  12  129.09    6.30
   2   4  12  144.79    6.50
   2   4  12  136.29    6.20
  -3  -4 -12   65.89    4.40
  -3  -4 -12   70.49    4.20
  -3  -4 -12   64.39    4.20
  -3  -4 -12   72.79    3.90
   3   4  12   73.79    4.30
   3   4  12   68.29    4.30
   3   4  12   65.89    4.10
  -4  -4 -12   -2.80    1.10
  -4  -4 -12    0.70    1.40
  -4  -4 -12    1.00    1.30
  -4  -4 -12    2.20    1.40
   4   4  12    1.60    1.50
   4   4  12   -0.50    1.30
  -5  -4 -12    1.90    1.20
  -5  -4 -12    0.40    1.00
  -5  -4 -12   -0.20    1.00
  -5  -4 -12    1.00    1.20
   5   4  12   -0.90    1.00
   5   4  12    0.20    1.20
  -6   4  11   14.60    1.80
  -6   4  11   13.00    1.90
  -6   4  11   13.20    1.90
  -6   4  11   12.30    1.50
  -6   4  11   13.40    2.00
  -5   4  11  145.49    6.90
  -5   4  11  159.58    6.60
  -5   4  11  142.49    6.60
  -5   4  11  156.58    6.80
  -5   4  11  139.89    6.90
  -5   4  11  138.39    6.80
   4  -4 -11   86.59    6.70
  -4   4  11   89.69    5.60
  -4   4  11   94.79    5.70
  -4   4  11   97.29    7.40
  -4   4  11   93.99    5.10
  -4   4  11   93.79    5.90
  -4   4  11   91.19    4.70
  -4   4  11   93.09    5.30
  -4   4  11   90.49    5.20
   3  -4 -11  254.77   12.10
  -3   4  11  263.07    9.70
  -3   4  11  256.67   11.00
  -3   4  11  266.57   12.50
  -3   4  11  252.37   10.70
  -3   4  11  262.47   10.00
  -3   4  11  251.17   10.70
  -3   4  11  238.98   10.20
   2  -4 -11  384.26   16.60
   2  -4 -11  378.96   15.90
  -2   4  11  389.56   13.80
  -2   4  11  381.56   14.40
  -2   4  11  385.36   17.40
   1  -4 -11    3.50    1.50
   1  -4 -11    3.20    2.40
   1  -4 -11    3.40    2.40
  -1   4  11    4.50    2.90
  -1   4  11    5.20    1.60
   0   4  11  137.79    8.80
   1   4  11    1.70    2.90
  -2  -4 -11  153.98    7.10
  -2  -4 -11  165.18    6.80
  -2  -4 -11  159.08    7.00
   2   4  11  143.69    7.00
   2   4  11  163.68    7.00
   2   4  11  165.48    7.30
  -3  -4 -11   36.40    3.40
  -3  -4 -11   32.80    3.10
  -3  -4 -11   40.60    3.50
  -3  -4 -11   37.80    3.50
   3   4  11   34.10    3.40
   3   4  11   42.50    3.80
  -4  -4 -11    3.00    1.50
  -4  -4 -11    1.70    1.40
  -4  -4 -11    2.80    1.60
  -4  -4 -11    3.60    1.80
   4   4  11    3.90    1.70
   4   4  11    2.00    1.60
   4   4  11    3.80    1.60
  -5  -4 -11   24.60    2.50
  -5  -4 -11   30.00    2.60
  -5  -4 -11   21.30    2.30
  -5  -4 -11   21.20    2.30
   5   4  11   26.20    2.40
   5   4  11   22.60    2.30
  -6   4  10   33.10    2.60
  -6   4  10   29.90    3.00
  -6   4  10   28.30    2.80
  -6   4  10   29.60    2.80
  -6   4  10   30.20    2.90
  -5   4  10    2.50    1.80
  -5   4  10   -0.40    1.70
  -5   4  10    1.00    1.80
  -5   4  10    1.20    1.80
  -5   4  10    0.20    1.30
  -5   4  10    0.30    1.50
   4  -4 -10  195.78   11.00
  -4   4  10  211.58    9.40
  -4   4  10  224.18    9.80
  -4   4  10  229.58    9.70
  -4   4  10  225.28    9.00
  -4   4  10  216.98    9.80
  -4   4  10  222.48   11.50
  -4   4  10  224.98    8.70
  -4   4  10  218.68    9.40
   3  -4 -10   77.09    6.20
   3  -4 -10   68.89    6.20
  -3   4  10   70.39    6.70
  -3   4  10   79.09    4.40
  -3   4  10   73.49    6.40
  -3   4  10   75.79    5.00
  -3   4  10   62.69    7.20
   2  -4 -10   12.30    3.00
   2  -4 -10    4.30    2.40
  -2   4  10    7.10    3.20
  -2   4  10    5.70    1.80
  -2   4  10   10.50    2.80
  -2   4  10   11.20    1.80
   1  -4 -10    5.70    1.90
   1  -4 -10    2.10    2.00
   1  -4 -10    7.40    2.50
  -1   4  10    3.60    1.70
  -1   4  10    7.60    2.80
  -1   4  10    5.10    1.60
   0  -4 -10  188.88    9.30
   0   4  10  178.38    9.70
   1   4  10  327.47   14.20
   2   4  10   65.59    5.90
   2   4  10   64.99    4.10
   2   4  10   57.49    6.10
  -3  -4 -10   18.00    2.50
  -3  -4 -10   20.00    2.50
  -3  -4 -10   22.00    2.80
  -3  -4 -10   16.50    2.60
   3   4  10   22.00    2.70
   3   4  10   19.70    2.60
  -4  -4 -10    4.00    1.90
  -4  -4 -10    2.50    1.60
  -4  -4 -10    2.60    1.70
  -4  -4 -10    0.90    1.80
  -4  -4 -10    3.30    1.50
   4   4  10    2.80    1.70
   4   4  10    8.00    1.80
  -5  -4 -10    7.50    1.80
  -5  -4 -10    4.30    1.60
  -5  -4 -10    5.20    1.60
  -5  -4 -10    3.40    1.40
  -5  -4 -10    4.90    1.70
   5   4  10    4.20    1.50
   5   4  10    5.50    1.80
  -6  -4 -10    1.50    1.10
  -6  -4 -10    1.10    1.00
  -6  -4 -10    1.20    1.10
  -6  -4 -10    2.00    1.10
   6   4  10    1.00    1.20
  -7   4   9   -0.80    1.00
  -7   4   9   -0.40    0.90
  -7   4   9    0.30    1.10
  -6   4   9   74.59    4.30
  -6   4   9   91.79    4.70
  -6   4   9   79.19    4.70
  -6   4   9   83.89    4.20
  -6   4   9   77.49    4.60
   5  -4  -9   -0.40    2.70
  -5   4   9    0.20    1.70
  -5   4   9   -1.90    1.70
  -5   4   9   -0.70    1.40
  -5   4   9   -0.50    1.70
  -5   4   9    0.10    2.90
  -5   4   9    1.30    1.50
  -5   4   9    0.50    1.70
   4  -4  -9  224.58   11.30
   4  -4  -9  235.78   11.50
   4  -4  -9  224.58   12.30
  -4   4   9  228.88   12.60
  -4   4   9  226.68    9.10
  -4   4   9  205.68   10.10
  -4   4   9  223.68   10.20
  -4   4   9  226.28   12.20
  -4   4   9  237.58    9.30
  -4   4   9  226.48    9.90
  -4   4   9  243.68   11.80
  -4   4   9  234.18    9.80
   3  -4  -9  112.59    7.30
   3  -4  -9  118.79    7.50
  -3   4   9  121.19    5.70
  -3   4   9  116.19    8.20
  -3   4   9   98.79    7.70
  -3   4   9  119.89    7.70
  -3   4   9  121.99    6.20
   2  -4  -9   81.49    5.80
   2  -4  -9   80.39    5.70
  -2   4   9   62.89    5.70
  -2   4   9   75.69    4.50
  -2   4   9   75.59    6.30
  -2   4   9   71.69    5.70
   1  -4  -9   -0.20    1.70
   1  -4  -9    1.80    1.70
  -1   4   9   -2.40    1.60
  -1   4   9   -0.50    1.30
   0  -4  -9  130.69    7.10
   0   4   9  121.49    7.00
   0   4   9  130.09    7.40
   1   4   9   34.20    3.10
   1   4   9   27.70    3.70
   1   4   9   40.50    4.90
  -2  -4  -9    9.50    1.80
   2   4   9   12.60    3.00
   2   4   9   12.10    2.00
   2   4   9    8.10    2.80
  -3  -4  -9    5.70    1.80
  -3  -4  -9    3.40    1.70
   3   4   9    4.90    1.70
   3   4   9    0.30    2.70
   3   4   9    4.40    2.80
  -4  -4  -9   38.70    3.40
  -4  -4  -9   36.90    3.60
  -4  -4  -9   35.40    3.50
  -4  -4  -9   30.40    3.40
  -4  -4  -9   30.70    3.40
  -4  -4  -9   27.10    3.00
  -4  -4  -9   27.70    3.10
   4   4   9   32.10    3.10
   4   4   9   36.20    3.50
  -5  -4  -9    8.60    2.00
  -5  -4  -9   10.10    2.10
  -5  -4  -9    8.60    2.00
  -5  -4  -9   12.80    2.30
  -5  -4  -9    8.50    2.00
  -5  -4  -9   12.60    2.00
  -5  -4  -9    9.60    2.00
  -5  -4  -9   12.50    2.20
   5   4   9   10.40    1.90
   5   4   9   10.50    1.90
  -6  -4  -9   31.80    2.80
  -6  -4  -9   28.40    2.80
  -6  -4  -9   35.40    2.80
  -6  -4  -9   31.60    2.80
  -6  -4  -9   33.90    2.80
  -6  -4  -9   34.10    2.90
   6   4   9   37.40    2.80
  -7   4   8   58.79    3.50
  -7   4   8   60.99    3.40
  -7   4   8   55.19    3.50
  -7   4   8   64.39    3.10
  -6   4   8   51.39    3.90
  -6   4   8   45.60    3.50
  -6   4   8   48.30    3.40
  -6   4   8   51.09    3.90
   5  -4  -8  386.06   16.80
  -5   4   8  377.16   16.60
  -5   4   8  397.36   14.00
  -5   4   8  373.16   14.60
  -5   4   8  389.16   14.30
  -5   4   8  396.96   14.90
  -5   4   8  393.76   14.70
  -5   4   8  382.76   14.80
  -5   4   8  404.06   14.40
   4  -4  -8   41.50    4.90
   4  -4  -8   47.20    6.20
   4  -4  -8   48.60    5.40
  -4   4   8   44.00    3.50
  -4   4   8   44.00    5.90
  -4   4   8   34.00    5.30
  -4   4   8   46.20    5.40
  -4   4   8   47.10    4.00
   3  -4  -8    3.40    2.40
   3  -4  -8    1.90    1.80
  -3   4   8   -0.30    1.30
  -3   4   8   -0.60    2.20
  -3   4   8    0.40    2.10
  -3   4   8   -0.60    2.40
   2  -4  -8   73.39    5.30
   2  -4  -8   74.59    5.30
  -2   4   8   76.29    5.40
  -2   4   8   71.09    5.40
  -2   4   8   81.59    6.00
  -2   4   8   69.59    4.20
   1  -4  -8    6.50    2.00
   1  -4  -8    8.30    2.00
  -1   4   8    3.60    2.10
  -1   4   8    9.40    2.50
  -1   4   8    9.10    1.70
  -1   4   8    4.70    1.90
   0  -4  -8  103.79    5.90
   0  -4  -8   87.39    7.00
   0   4   8   97.59    5.70
   0   4   8  102.69    6.00
  -1  -4  -8  254.97    9.30
   1   4   8  270.87   11.10
   1   4   8  262.37   11.10
   1   4   8  252.97    9.30
  -2  -4  -8    0.80    1.20
  -2  -4  -8    1.20    1.10
   2   4   8    1.40    2.10
   2   4   8    1.10    2.10
   2   4   8   -0.60    1.20
  -3  -4  -8  270.47   10.20
  -3  -4  -8  255.17   10.10
   3   4   8  276.47   12.50
   3   4   8  255.17   12.10
   3   4   8  280.87   10.30
  -4  -4  -8    2.70    1.60
  -4  -4  -8    2.50    1.70
  -4  -4  -8    2.40    1.60
  -4  -4  -8    5.00    2.00
  -4  -4  -8    2.60    1.80
  -4  -4  -8    1.20    1.50
  -4  -4  -8    2.40    1.60
  -4  -4  -8    4.00    2.00
  -4  -4  -8    5.30    2.00
   4   4   8    2.10    1.80
  -5  -4  -8    2.20    1.70
  -5  -4  -8    3.20    1.70
  -5  -4  -8    1.10    1.60
  -5  -4  -8    1.10    1.50
  -5  -4  -8    2.80    1.90
  -5  -4  -8    3.40    1.80
  -5  -4  -8    3.20    1.80
  -5  -4  -8   -0.10    1.60
   5   4   8    0.40    1.50
   5   4   8    1.80    1.60
  -6  -4  -8   -0.50    1.20
  -6  -4  -8    0.70    1.40
  -6  -4  -8   -1.90    1.40
  -6  -4  -8   -0.30    1.30
  -6  -4  -8    0.00    1.40
  -6  -4  -8   -0.70    1.40
  -7   4   7   13.20    1.90
  -7   4   7   12.90    1.80
  -7   4   7   12.70    1.80
  -6   4   7    4.90    2.00
  -6   4   7    1.90    1.50
  -6   4   7    2.30    1.70
  -6   4   7    3.60    1.50
  -6   4   7    6.90    2.10
  -5   4   7   59.59    3.90
  -5   4   7   60.09    3.90
  -5   4   7   60.69    4.10
  -5   4   7   61.39    4.70
  -5   4   7   60.29    4.70
  -5   4   7   58.29    4.80
  -5   4   7   68.09    4.60
  -5   4   7   61.29    6.60
   4  -4  -7   21.00    4.50
   4  -4  -7   14.10    3.30
  -4   4   7   18.70    3.90
  -4   4   7   17.00    3.50
  -4   4   7   21.00    4.30
  -4   4   7   15.60    2.20
  -4   4   7   15.90    2.60
   3  -4  -7  382.46   15.50
  -3   4   7  384.66   16.10
  -3   4   7  388.06   14.30
  -3   4   7  385.96   15.70
  -3   4   7  431.16   16.70
   2  -4  -7   -1.80    1.40
   2  -4  -7    2.80    1.60
  -2   4   7   -0.10    1.40
  -2   4   7    1.70    1.30
  -2   4   7    1.40    1.80
  -2   4   7    1.60    1.60
  -2   4   7    0.90    1.80
   1  -4  -7  117.79    6.00
   1  -4  -7  109.29    6.00
  -1   4   7  115.39    5.90
  -1   4   7  136.99    6.50
  -1   4   7  110.09    6.30
  -1   4   7  125.69    8.10
   0  -4  -7  734.83   25.30
   0  -4  -7  778.32   26.00
   0   4   7  764.22   26.00
   0   4   7  737.73   25.70
  -1  -4  -7  185.68    8.40
   1   4   7  200.58    8.60
   1   4   7  191.68    8.50
  -2  -4  -7    4.10    1.20
  -2  -4  -7    1.20    1.10
  -2  -4  -7    2.80    1.90
   2   4   7    0.30    1.40
   2   4   7    4.50    2.00
   2   4   7    2.20    1.10
   2   4   7    3.10    2.00
  -3  -4  -7   53.09    4.90
  -3  -4  -7   53.49    3.50
  -3  -4  -7   45.30    3.20
   3   4   7   56.29    4.80
   3   4   7   46.30    5.00
   3   4   7   59.39    5.10
   3   4   7   55.69    3.40
  -4  -4  -7   94.19    5.20
  -4  -4  -7   95.19    5.00
  -4  -4  -7   93.59    7.20
   4   4   7   83.29    6.60
   4   4   7   96.39    5.00
   4   4   7   88.19    7.20
   4   4   7   89.79    6.90
  -5  -4  -7   21.40    3.00
  -5  -4  -7   23.00    3.10
  -5  -4  -7   24.80    3.00
  -5  -4  -7   22.50    2.80
  -5  -4  -7   22.00    3.00
  -5  -4  -7   19.60    2.50
  -5  -4  -7   27.50    3.10
  -5  -4  -7   21.40    2.90
   5   4   7   21.40    2.70
  -6  -4  -7   13.80    2.20
  -6  -4  -7    9.30    2.10
  -6  -4  -7   10.80    2.00
  -6  -4  -7   15.20    2.30
  -6  -4  -7   17.60    2.40
  -6  -4  -7   17.00    2.60
  -6  -4  -7    8.90    1.90
   6   4   7   17.30    3.10
  -7  -4  -7    1.70    1.10
  -7  -4  -7    3.10    1.30
  -7  -4  -7    2.50    1.30
  -7  -4  -7    1.10    1.10
  -7  -4  -7   -1.10    1.10
  -7  -4  -7    2.00    1.20
   7   4   7   -0.50    1.20
  -7   4   6    1.80    1.50
  -7   4   6    2.50    1.40
  -7   4   6    3.40    1.40
  -6   4   6    4.50    1.70
  -6   4   6    1.80    1.80
  -6   4   6    8.50    2.00
  -6   4   6    1.20    1.40
  -6   4   6    4.70    3.00
  -6   4   6    1.70    1.80
   5  -4  -6   25.60    5.30
  -5   4   6   16.00    3.90
  -5   4   6   16.30    3.90
  -5   4   6   22.60    2.70
  -5   4   6   26.60    4.90
   4  -4  -6  163.68    9.50
  -4   4   6  177.78    9.60
  -4   4   6  162.18    9.40
  -4   4   6  174.88    7.60
  -4   4   6  175.58    9.20
  -4   4   6  166.58    7.20
   3  -4  -6   11.50    2.50
  -3   4   6   13.70    2.80
  -3   4   6   14.90    2.20
  -3   4   6   11.30    2.80
  -3   4   6   13.40    2.80
  -3   4   6   14.80    3.20
   2  -4  -6  124.89    6.30
  -2   4   6  116.99    6.40
  -2   4   6  122.09    6.60
  -2   4   6  118.29    6.10
  -2   4   6  117.49    6.30
   1  -4  -6    1.20    1.30
   1  -4  -6    1.70    1.50
  -1   4   6    1.30    1.40
  -1   4   6    5.80    1.60
  -1   4   6    1.40    1.40
  -1   4   6    4.60    1.70
   0  -4  -6  839.22   28.10
   0   4   6  847.62   28.10
   0   4   6  822.22   27.90
  -1  -4  -6    1.40    1.40
  -1  -4  -6    0.50    1.10
   1   4   6   -0.30    1.20
   1   4   6   -0.10    1.20
   1   4   6   -0.60    1.40
  -2  -4  -6   12.10    2.40
   2   4   6    8.70    2.10
   2   4   6    8.60    2.20
   2   4   6    9.70    2.30
  -3  -4  -6   29.10    2.70
  -3  -4  -6   28.10    2.50
  -3  -4  -6   30.20    4.00
   3   4   6   27.00    3.60
   3   4   6   31.30    2.50
   3   4   6   30.50    3.60
   3   4   6   28.10    4.10
  -4  -4  -6   28.70    4.30
  -4  -4  -6   30.30    2.90
  -4  -4  -6   24.20    2.90
   4   4   6   29.20    4.50
   4   4   6   27.40    4.10
   4   4   6   23.70    4.40
   4   4   6   30.00    2.90
  -5  -4  -6   20.40    2.80
  -5  -4  -6   18.60    2.50
  -5  -4  -6   18.60    2.70
  -5  -4  -6   16.40    2.70
  -5  -4  -6   14.00    2.50
  -5  -4  -6   19.60    2.80
  -5  -4  -6   19.10    2.90
  -5  -4  -6   15.70    2.60
   5   4   6   17.90    2.40
  -6  -4  -6    2.20    1.70
  -6  -4  -6    2.90    1.60
  -6  -4  -6    1.80    1.50
  -6  -4  -6    2.80    1.90
  -6  -4  -6    0.70    1.60
  -6  -4  -6    0.70    1.60
  -6  -4  -6   -0.80    1.30
  -6  -4  -6    1.60    1.50
   6   4   6    2.50    1.60
  -7  -4  -6    3.70    1.40
  -7  -4  -6    3.50    1.40
  -7  -4  -6    2.20    1.40
  -7  -4  -6    3.00    1.50
  -7  -4  -6    4.90    1.60
  -7   4   5  122.19    5.40
  -7   4   5  127.09    5.40
  -7   4   5  125.39    5.80
  -7   4   5  130.59    5.70
  -6   4   5   13.90    2.20
  -6   4   5   11.50    3.70
  -6   4   5   11.40    2.10
  -6   4   5   14.30    2.70
  -6   4   5   15.20    2.40
   5  -4  -5  381.16   17.30
  -5   4   5  406.46   16.90
  -5   4   5  366.06   16.80
  -5   4   5  390.86   17.20
  -5   4   5  396.16   14.20
   4  -4  -5   97.89    7.00
  -4   4   5  104.39    6.80
  -4   4   5   97.29    6.60
  -4   4   5   94.29    6.90
  -4   4   5  104.19    7.00
  -4   4   5  104.59    5.30
   3  -4  -5  274.37   10.80
  -3   4   5  255.57   11.10
  -3   4   5  253.77   11.40
  -3   4   5  266.47   11.20
  -3   4   5  252.87   11.30
   2  -4  -5   84.49    4.60
  -2   4   5   79.09    4.90
  -2   4   5   78.19    4.80
  -2   4   5   73.09    4.60
  -2   4   5   81.29    4.90
   1  -4  -5 2067.69   64.69
  -1   4   5 2042.60   64.59
  -1   4   5 2013.00   64.79
  -1   4   5 1991.20   64.59
   0  -4  -5 1328.27   42.00
   0  -4  -5 1218.38   44.40
   0   4   5 1345.47   41.90
   0   4   5 1230.08   41.50
   0   4   5 1356.66   41.90
  -1  -4  -5  189.88    7.60
  -1  -4  -5  182.18    8.70
  -1  -4  -5  188.18    7.60
   1   4   5  177.98    8.90
   1   4   5  162.68    7.50
   1   4   5  195.78    7.80
   1   4   5  191.68    7.60
  -2  -4  -5 1460.95   46.60
   2   4   5 1413.86   46.10
   2   4   5 1421.46   46.40
   2   4   5 1385.46   46.70
  -3  -4  -5    4.60    2.10
  -3  -4  -5    6.20    1.50
  -3  -4  -5    2.30    1.10
   3   4   5    4.00    1.80
   3   4   5    4.40    2.30
   3   4   5    2.60    1.70
  -4  -4  -5   -0.30    1.90
  -4  -4  -5   -0.60    1.30
  -4  -4  -5   -1.20    1.00
  -4  -4  -5   -1.00    2.00
   4   4   5    1.80    2.00
   4   4   5   -1.70    1.80
   4   4   5    0.90    1.20
   4   4   5    0.90    2.40
  -5  -4  -5   28.20    3.10
  -5  -4  -5   28.50    4.80
  -5  -4  -5   27.30    3.10
  -5  -4  -5   31.30    3.20
  -5  -4  -5   31.00    3.60
  -5  -4  -5   37.50    3.70
  -5  -4  -5   24.00    3.00
  -5  -4  -5   26.00    2.70
  -5  -4  -5   31.20    3.20
   5   4   5   28.60    5.50
   5   4   5   29.70    5.00
   5   4   5   37.20    3.10
  -6  -4  -5   24.90    2.70
  -6  -4  -5   33.90    3.50
  -6  -4  -5   32.60    3.50
  -6  -4  -5   31.40    3.30
  -6  -4  -5   25.20    2.90
  -6  -4  -5   33.20    3.40
  -6  -4  -5   22.80    3.00
  -6  -4  -5   28.60    3.10
   6   4   5   27.10    2.80
  -7  -4  -5   29.20    2.90
  -7  -4  -5   30.00    2.90
  -7  -4  -5   26.60    2.60
  -7  -4  -5   33.00    2.90
  -7  -4  -5   31.70    3.00
  -7   4   4   52.79    3.50
  -7   4   4   51.69    3.30
  -6   4   4  582.94   22.60
  -6   4   4  566.04   19.70
  -6   4   4  571.14   19.40
  -6   4   4  564.54   19.40
  -6   4   4  536.65   20.10
   5  -4  -4    5.60    3.10
  -5   4   4    6.10    2.90
  -5   4   4    8.60    3.20
  -5   4   4    8.70    3.00
  -5   4   4    9.40    2.00
  -5   4   4    8.80    3.10
   4  -4  -4   82.49    6.20
  -4   4   4   88.19    6.10
  -4   4   4   82.69    6.00
  -4   4   4   85.99    6.00
  -4   4   4   84.09    6.10
   3  -4  -4   46.00    3.50
  -3   4   4   38.50    3.70
  -3   4   4   37.60    4.20
  -3   4   4   31.30    3.70
  -3   4   4   39.80    3.80
   2  -4  -4  122.09    5.60
  -2   4   4  126.39    6.00
  -2   4   4  113.39    5.70
  -2   4   4  116.59    5.80
  -2   4   4  129.69    6.10
   1  -4  -4    2.10    1.70
   1  -4  -4    3.20    1.10
  -1   4   4    1.80    1.10
  -1   4   4    0.60    1.10
  -1   4   4    3.70    1.30
  -1   4   4    1.60    1.50
   0  -4  -4  217.68    9.90
   0  -4  -4  219.28    9.90
   0  -4  -4  203.98    7.90
   0   4   4  189.78    8.00
   0   4   4  218.28    8.00
   0   4   4  212.08    9.90
   0   4   4  222.68   10.00
   0   4   4  212.78    8.10
   0   4   4  168.28    7.60
   0   4   4  214.38    7.90
  -1  -4  -4    0.70    0.90
  -1  -4  -4    0.70    1.40
  -1  -4  -4    2.10    1.10
   1   4   4    1.20    1.50
   1   4   4    1.10    1.70
   1   4   4    1.20    1.20
   1   4   4    0.60    1.10
   1   4   4    2.70    1.20
  -2  -4  -4  336.27   12.70
   2   4   4  339.47   12.50
   2   4   4  332.87   12.20
   2   4   4  334.07   13.00
  -3  -4  -4  326.27   13.20
  -3  -4  -4  326.87   12.40
  -3  -4  -4  309.07   12.60
  -3  -4  -4  335.77   11.80
   3   4   4  324.57   12.50
   3   4   4  341.67   13.00
  -4  -4  -4   56.09    5.10
  -4  -4  -4   52.99    3.60
  -4  -4  -4   56.39    4.80
  -4  -4  -4   55.99    3.50
   4   4   4   39.20    4.60
   4   4   4   51.59    4.30
  -5  -4  -4  460.95   16.30
  -5  -4  -4  467.05   16.10
  -5  -4  -4  466.85   19.30
  -5  -4  -4  441.56   18.30
   5   4   4  442.96   19.50
   5   4   4  451.65   18.30
   5   4   4  437.26   15.80
  -6  -4  -4   14.40    2.50
  -6  -4  -4   14.30    2.40
  -6  -4  -4   13.20    2.40
  -6  -4  -4   13.60    2.50
  -6  -4  -4   12.10    2.30
  -6  -4  -4   13.00    2.30
  -6  -4  -4   14.80    2.40
  -7  -4  -4    8.90    2.00
  -7  -4  -4   10.40    2.00
  -7  -4  -4   10.50    1.90
  -7  -4  -4    9.70    2.00
  -8   4   3   11.20    1.40
  -7   4   3   50.99    3.40
  -7   4   3   47.90    3.40
  -7   4   3   56.99    3.70
  -7   4   3   48.30    3.40
  -6   4   3  475.45   16.40
  -6   4   3  450.25   19.40
  -6   4   3  443.86   16.40
  -6   4   3  456.25   16.40
  -6   4   3  503.35   16.90
   5  -4  -3   14.90    3.70
  -5   4   3   16.30    3.80
  -5   4   3   17.00    2.40
  -5   4   3   18.30    3.80
  -5   4   3   15.00    2.20
  -5   4   3   15.80    3.40
  -5   4   3   16.80    3.50
   4  -4  -3  223.78   10.70
  -4   4   3  227.08   10.50
  -4   4   3  228.88   10.40
  -4   4   3  216.88   10.20
  -4   4   3  218.18    8.30
  -4   4   3  217.58   10.40
   3  -4  -3  194.08    8.90
  -3   4   3  198.58    8.70
  -3   4   3  195.28    8.80
  -3   4   3  187.48    8.60
  -3   4   3  206.88    8.80
  -3   4   3  192.38    8.80
   2  -4  -3  425.06   14.80
  -2   4   3  427.96   15.30
  -2   4   3  410.46   15.00
  -2   4   3  421.86   15.10
  -2   4   3  448.16   15.40
   1  -4  -3  293.77   10.30
   1  -4  -3  304.57   11.80
   1  -4  -3  282.37   11.80
  -1   4   3  279.27   10.30
  -1   4   3  280.07   11.90
  -1   4   3  293.87   10.40
  -1   4   3  281.77   12.00
  -1   4   3  284.17   10.30
   0  -4  -3 2013.80   63.89
   0  -4  -3 2055.89   65.39
   0  -4  -3 2000.60   65.29
   0  -4  -3 1906.71   63.39
   0   4   3 2052.19   65.29
   0   4   3 2029.00   63.79
   0   4   3 2124.89   65.59
   0   4   3 1938.51   63.39
  -1  -4  -3    0.10    1.30
  -1  -4  -3   -0.10    1.00
  -1  -4  -3   -0.50    1.20
  -1  -4  -3    0.20    0.90
   1   4   3    0.20    1.30
   1   4   3   -0.20    1.30
   1   4   3   -1.10    0.90
   1   4   3   -0.90    0.90
   1   4   3   -0.30    1.00
   1   4   3   -0.50    1.20
  -2  -4  -3  412.06   14.60
  -2  -4  -3  397.06   14.20
  -2  -4  -3  373.16   14.00
   2   4   3  408.56   14.00
   2   4   3  417.76   14.40
  -3  -4  -3   50.39    3.70
  -3  -4  -3   55.99    4.30
   3   4   3   53.19    3.70
   3   4   3   52.79    4.00
  -4  -4  -3   30.40    2.60
  -4  -4  -3   26.80    3.60
  -4  -4  -3   26.10    3.90
  -4  -4  -3   24.70    2.60
   4   4   3   31.20    3.70
   4   4   3   28.00    3.80
  -5  -4  -3   10.20    3.20
  -5  -4  -3   15.20    3.90
  -5  -4  -3   17.80    2.20
  -5  -4  -3   14.80    2.40
   5   4   3   14.70    3.90
   5   4   3    9.00    3.00
  -6  -4  -3   47.20    4.00
  -6  -4  -3   47.10    4.20
  -6  -4  -3   49.99    3.90
  -6  -4  -3   49.20    3.90
  -6  -4  -3   50.69    4.20
  -7  -4  -3   22.10    2.60
  -7  -4  -3   25.80    2.70
  -7  -4  -3   26.80    2.90
  -7  -4  -3   20.60    2.60
  -8   4   2    2.20    1.00
  -7   4   2    1.30    1.50
  -7   4   2    1.50    1.50
  -7   4   2    0.50    1.40
  -7   4   2    0.60    1.40
  -6   4   2   27.90    4.60
  -6   4   2   23.50    3.00
  -6   4   2   21.30    2.80
  -6   4   2   25.60    2.90
  -6   4   2   30.50    3.10
  -6   4   2   25.60    2.80
   5  -4  -2   20.50    3.90
  -5   4   2   10.40    3.20
  -5   4   2   12.70    3.10
  -5   4   2   15.60    2.40
  -5   4   2   18.70    2.30
  -5   4   2   16.00    3.40
   4  -4  -2   21.80    3.60
  -4   4   2   28.30    3.60
  -4   4   2   28.20    3.90
  -4   4   2   31.30    4.10
  -4   4   2   26.40    3.70
  -4   4   2   31.00    4.10
  -4   4   2   26.30    2.50
   3  -4  -2   94.69    5.40
  -3   4   2   82.89    5.20
  -3   4   2   87.29    5.10
  -3   4   2   90.19    5.20
  -3   4   2   80.19    4.90
  -3   4   2   79.69    5.00
   2  -4  -2 1102.69   36.40
   2  -4  -2 1155.58   35.70
   2  -4  -2 1121.09   36.20
  -2   4   2 1087.89   36.30
  -2   4   2 1153.98   36.40
  -2   4   2 1147.29   36.40
  -2   4   2 1077.59   36.30
  -2   4   2 1066.89   36.20
   1  -4  -2  111.39    5.90
   1  -4  -2  111.79    5.80
   1  -4  -2  109.29    4.60
  -1   4   2  117.09    4.80
  -1   4   2  113.29    6.00
  -1   4   2  121.69    6.10
  -1   4   2  103.69    4.70
   0  -4  -2  175.98    8.10
   0  -4  -2  177.98    7.90
   0  -4  -2  168.98    7.10
   0   4   2  181.28    7.00
   0   4   2  188.18    8.10
   0   4   2  182.88    8.10
  -1  -4  -2   90.09    4.20
  -1  -4  -2   97.89    5.20
  -1  -4  -2   82.89    5.10
  -1  -4  -2   96.59    5.20
   1   4   2   90.49    4.00
   1   4   2   82.39    4.80
   1   4   2   97.99    5.10
   1   4   2   92.59    5.10
   1   4   2   78.99    4.10
   1   4   2   96.49    5.10
  -2  -4  -2  456.65   15.80
  -2  -4  -2  458.65   15.80
  -2  -4  -2  463.85   17.90
  -2  -4  -2  447.36   16.20
   2   4   2  458.45   15.90
   2   4   2  457.85   18.10
   2   4   2  491.95   15.70
  -3  -4  -2  246.58   10.00
  -3  -4  -2  238.78   10.50
   3   4   2  266.37   10.30
   3   4   2  268.57   10.00
  -4  -4  -2  177.38    8.30
  -4  -4  -2  177.48    7.10
  -4  -4  -2  178.88    8.90
  -4  -4  -2  169.38    6.90
   4   4   2  172.88    9.30
   4   4   2  172.58    8.40
  -5  -4  -2  282.57   10.70
  -5  -4  -2  292.87   10.90
  -5  -4  -2  288.07   13.50
  -5  -4  -2  285.67   12.60
   5   4   2  279.07   12.70
  -6  -4  -2   10.80    2.20
  -6  -4  -2   15.00    2.60
  -6  -4  -2   11.50    2.30
  -6  -4  -2   11.80    2.50
  -6  -4  -2   16.70    2.50
  -7  -4  -2   21.90    2.60
  -7  -4  -2   23.00    2.80
  -7  -4  -2   24.80    2.70
  -8   4   1   24.00    2.00
  -8   4   1   22.40    2.10
   7  -4  -1    1.60    1.70
  -7   4   1    0.70    1.60
  -7   4   1    1.50    1.40
  -7   4   1    2.70    1.50
  -7   4   1    0.20    1.30
  -7   4   1    0.80    2.00
  -7   4   1    0.00    1.50
  -6   4   1   20.10    2.70
  -6   4   1   17.40    2.50
  -6   4   1   21.30    2.70
  -6   4   1   17.60    2.70
  -6   4   1   19.50    2.70
  -6   4   1   13.90    3.90
  -6   4   1   16.30    2.60
   5  -4  -1    7.30    2.80
  -5   4   1    2.20    2.50
  -5   4   1    9.10    2.00
  -5   4   1    3.30    2.70
  -5   4   1    7.10    1.80
  -5   4   1    3.80    2.60
  -5   4   1    3.00    2.50
   4  -4  -1    7.90    2.40
  -4   4   1    6.90    2.30
  -4   4   1    5.90    2.10
  -4   4   1   10.90    3.00
  -4   4   1    9.00    2.40
  -4   4   1    8.70    1.60
  -4   4   1    5.70    2.40
   3  -4  -1  478.25   16.80
  -3   4   1  472.95   17.00
  -3   4   1  442.26   16.70
  -3   4   1  477.75   16.70
  -3   4   1  439.26   16.50
  -3   4   1  423.36   16.30
   2  -4  -1  243.58    9.40
   2  -4  -1  258.87    9.70
   2  -4  -1  199.98   10.70
  -2   4   1  249.18    9.30
  -2   4   1  236.58    9.70
  -2   4   1  241.48    9.40
  -2   4   1  250.27    9.20
  -2   4   1  243.18    9.20
   1  -4  -1 1769.62   55.19
   1  -4  -1 1661.53   54.99
   1  -4  -1 1657.93   54.09
  -1   4   1 1671.33   55.19
  -1   4   1 1730.93   55.29
  -1   4   1 1750.62   54.29
   0  -4  -1  575.24   20.10
   0  -4  -1  604.84   20.30
   0  -4  -1  570.94   19.50
   0   4   1  582.04   20.20
   0   4   1  584.64   19.50
  -1  -4  -1    9.80    2.00
  -1  -4  -1    8.80    1.70
   1   4   1   10.10    2.00
   1   4   1    9.20    1.90
   1   4   1   10.60    1.90
   1   4   1    8.60    1.60
  -2  -4  -1   12.90    1.80
  -2  -4  -1   15.60    1.90
  -2  -4  -1   11.50    1.60
  -2  -4  -1   15.50    1.90
   2   4   1   16.00    2.00
   2   4   1   17.00    2.70
   2   4   1   20.10    2.20
  -3  -4  -1  137.49    6.00
  -3  -4  -1  137.29    6.70
  -3  -4  -1  136.79    6.20
   3   4   1  146.19    6.50
   3   4   1  140.69    6.10
  -4  -4  -1  429.76   14.60
  -4  -4  -1  428.96   16.50
  -4  -4  -1  447.16   15.90
  -4  -4  -1  398.56   14.40
   4   4   1  402.96   15.90
  -5  -4  -1  256.57   12.20
  -5  -4  -1  250.07   11.50
  -5  -4  -1  260.07    9.80
   5   4   1  251.57   11.60
  -6  -4  -1   50.09    3.90
  -6  -4  -1   56.79    4.30
  -6  -4  -1   52.29    4.20
  -7  -4  -1   20.20    2.70
  -8   4   0    5.40    1.30
  -8   4   0    7.30    1.40
   7  -4   0    2.90    1.80
  -7   4   0    2.40    1.50
  -7   4   0    3.20    1.60
  -7   4   0    0.80    1.60
  -7   4   0    3.70    1.80
  -7   4   0    3.20    1.60
  -7   4   0    2.30    1.40
  -6   4   0  121.49    6.10
  -6   4   0  122.29    6.10
  -6   4   0  124.19    6.30
  -6   4   0  131.59    6.40
  -6   4   0  127.19    6.20
  -6   4   0  137.79    8.80
  -6   4   0  119.19    6.20
   5  -4   0  432.86   17.70
  -5   4   0  438.46   17.80
  -5   4   0  438.76   15.00
  -5   4   0  401.66   17.20
  -5   4   0  396.76   15.20
  -5   4   0  421.96   18.20
  -5   4   0  426.06   17.50
   4  -4   0  505.75   18.80
  -4   4   0  520.65   19.40
  -4   4   0  495.95   19.50
  -4   4   0  510.05   19.00
  -4   4   0  496.45   18.90
  -4   4   0  489.95   17.00
   3  -4   0 1025.40   33.50
  -3   4   0  988.50   33.50
  -3   4   0 1063.69   33.70
  -3   4   0  959.60   33.80
  -3   4   0  966.80   33.60
  -3   4   0 1011.90   33.40
   2  -4   0    1.10    1.30
   2  -4   0    1.70    1.20
  -2   4   0    1.10    1.10
  -2   4   0    3.10    1.50
  -2   4   0    0.70    1.10
  -2   4   0    0.60    1.00
  -2   4   0    0.30    1.00
   1  -4   0 1992.70   64.99
   1  -4   0 2016.60   64.29
   1  -4   0 2035.40   64.89
  -1   4   0 1978.10   65.09
  -1   4   0 2031.40   65.09
  -1   4   0 2095.69   64.59
   0  -4   0 9544.45  302.87
   0  -4   0 9436.26  303.77
   0  -4   0 9785.82  303.67
   0   4   0 9999.00  304.47
   0   4   0 9712.93  302.07
   0   4   0 9681.13  304.07
  -1  -4   0 1875.21   61.09
  -1  -4   0 1965.30   60.49
   1   4   0 1824.72   60.09
   1   4   0 1921.51   60.19
   1   4   0 1926.61   60.79
  -2  -4   0    1.80    0.90
  -2  -4   0    1.30    1.00
  -2  -4   0    1.20    1.00
   2   4   0    1.30    1.30
   2   4   0   -0.30    0.90
  -3  -4   0  947.81   31.40
  -3  -4   0  922.81   30.80
  -3  -4   0  876.41   30.80
   3   4   0  977.10   31.00
   3   4   0  969.50   32.10
  -4  -4   0  451.75   16.00
  -4  -4   0  491.35   18.00
  -4  -4   0  478.95   17.30
  -4  -4   0  459.65   16.00
   4   4   0  499.75   17.60
  -5  -4   0  372.86   15.80
  -5  -4   0  375.46   13.40
  -8   4  -1    7.70    1.30
  -8   4  -1    8.70    1.40
  -8   4  -1    6.70    1.40
  -7   4  -1   15.50    2.30
  -7   4  -1   16.30    2.60
  -7   4  -1   18.30    2.40
  -7   4  -1   16.40    2.40
  -6   4  -1   52.29    4.10
  -6   4  -1   56.59    4.20
  -6   4  -1   59.39    4.50
  -6   4  -1   54.79    6.70
  -6   4  -1   55.09    4.20
  -6   4  -1   56.49    4.20
  -6   4  -1   52.69    4.10
  -6   4  -1   50.39    3.80
   5  -4   1  274.47   12.80
  -5   4  -1  277.87   13.20
  -5   4  -1  272.37   12.80
  -5   4  -1  287.27   12.80
  -5   4  -1  271.37   10.80
  -5   4  -1  276.27   13.60
  -5   4  -1  280.07   10.60
   4  -4   1  469.75   17.30
  -4   4  -1  445.56   15.70
  -4   4  -1  471.55   17.70
  -4   4  -1  438.66   18.20
  -4   4  -1  457.95   18.00
  -4   4  -1  472.85   17.70
   3  -4   1  143.69    6.80
  -3   4  -1  143.29    6.80
  -3   4  -1  147.19    7.10
  -3   4  -1  150.28    7.00
  -3   4  -1  141.49    7.30
   2  -4   1   16.40    2.10
  -2   4  -1   15.40    2.00
  -2   4  -1   15.50    2.70
  -2   4  -1   14.40    2.10
  -2   4  -1   13.20    1.90
   1  -4   1   10.00    2.10
   1  -4   1   11.90    2.20
   1  -4   1   10.00    1.80
  -1   4  -1   11.10    2.30
  -1   4  -1   12.70    2.20
  -1   4  -1   10.00    2.10
   0  -4   1  594.64   20.90
   0  -4   1  597.74   20.90
   0   4  -1  620.04   20.90
   0   4  -1  578.54   20.70
   0   4  -1  636.84   20.50
  -1  -4   1 1698.33   53.89
  -1  -4   1 1634.64   54.29
   1   4  -1 1724.73   54.19
   1   4  -1 1747.33   53.59
   1   4  -1 1643.04   53.59
  -2  -4   1  219.68    8.40
  -2  -4   1  230.28    8.60
   2   4  -1  234.38    9.80
  -3  -4   1  433.86   15.00
  -3  -4   1  403.46   14.60
  -3  -4   1  418.76   15.10
  -4  -4   1   11.60    2.50
  -8   4  -2   -0.30    1.00
  -8   4  -2   -0.90    1.10
  -8   4  -2    1.30    1.00
  -7   4  -2   26.60    2.90
  -7   4  -2   23.60    2.80
  -7   4  -2   23.00    2.60
  -7   4  -2   22.80    2.60
  -7   4  -2   20.00    2.40
  -6   4  -2   14.70    2.50
  -6   4  -2   17.00    2.80
  -6   4  -2   15.40    2.40
  -6   4  -2   13.20    2.40
  -6   4  -2   14.50    2.50
  -6   4  -2   11.80    2.30
  -6   4  -2   15.10    4.40
  -6   4  -2   17.10    2.50
   5  -4   2  321.97   13.70
  -5   4  -2  313.87   11.50
  -5   4  -2  288.77   11.60
  -5   4  -2  279.07   14.30
  -5   4  -2  309.67   13.70
  -5   4  -2  295.47   13.50
  -5   4  -2  301.27   14.30
   4  -4   2  189.58    9.10
  -4   4  -2  186.48    9.70
  -4   4  -2  172.88    8.80
  -4   4  -2  185.98    9.40
  -4   4  -2  188.68    7.40
  -4   4  -2  178.88    8.90
   3  -4   2  240.78   10.50
   3  -4   2  265.97   10.30
  -3   4  -2  255.87   10.40
  -3   4  -2  269.37   10.50
  -3   4  -2  254.27   11.00
  -3   4  -2  252.97   10.80
   2  -4   2  467.05   16.50
  -2   4  -2  484.05   18.60
  -2   4  -2  485.65   16.60
  -2   4  -2  493.85   17.10
  -2   4  -2  470.35   16.60
   1  -4   2   98.59    5.70
   1  -4   2   92.39    4.30
   1  -4   2   99.39    5.70
  -1   4  -2   96.99    5.70
  -1   4  -2  101.19    5.50
  -1   4  -2   97.49    5.70
   0  -4   2  182.58    8.10
   0  -4   2  195.68    8.30
   0  -4   2  177.08    7.60
   0   4  -2  182.48    8.00
   0   4  -2  176.58    8.00
   0   4  -2  187.18    7.70
  -1  -4   2  108.89    5.50
  -1  -4   2  116.49    4.90
  -1  -4   2  105.79    5.40
  -1  -4   2  122.79    5.70
   1   4  -2  119.89    5.50
   1   4  -2  118.99    5.40
   1   4  -2  117.49    5.20
  -2  -4   2 1070.19   34.70
  -2  -4   2 1070.39   34.80
   2   4  -2 1071.19   35.80
  -3  -4   2   73.99    4.40
  -3  -4   2   77.39    4.40
  -7   4  -3   21.50    2.50
  -7   4  -3   22.40    2.40
  -7   4  -3   17.90    2.60
  -7   4  -3   22.80    2.60
  -6   4  -3   54.69    4.40
  -6   4  -3   46.60    4.00
  -6   4  -3   52.29    4.10
  -6   4  -3   46.90    4.10
  -6   4  -3   45.00    3.80
  -6   4  -3   62.39    4.10
  -6   4  -3   45.20    7.50
  -6   4  -3   45.60    3.90
   5  -4   3   16.80    3.70
  -5   4  -3   17.70    4.10
  -5   4  -3   11.00    2.20
  -5   4  -3   13.50    3.10
  -5   4  -3   16.50    4.20
  -5   4  -3   17.60    2.50
  -5   4  -3   14.90    3.40
   4  -4   3   27.00    3.70
  -4   4  -3   25.20    3.60
  -4   4  -3   30.70    4.10
  -4   4  -3   33.90    4.60
  -4   4  -3   25.60    4.00
  -4   4  -3   27.10    2.70
   3  -4   3   52.89    4.10
   3  -4   3   60.49    3.90
  -3   4  -3   60.09    4.20
  -3   4  -3   57.59    4.10
  -3   4  -3   57.19    4.50
   2  -4   3  414.96   14.80
   2  -4   3  401.06   14.80
  -2   4  -3  431.46   14.90
  -2   4  -3  432.56   15.40
  -2   4  -3  415.66   14.80
  -2   4  -3  434.26   15.50
   1  -4   3    0.00    0.90
   1  -4   3    1.40    1.00
   1  -4   3   -0.40    1.40
   1  -4   3    0.90    1.60
  -1   4  -3   -1.20    1.30
  -1   4  -3   -0.80    0.80
  -1   4  -3   -0.50    1.00
  -1   4  -3   -0.60    1.40
  -1   4  -3   -0.90    1.10
   0  -4   3 2090.49   64.99
   0  -4   3 2121.29   66.89
   0  -4   3 2057.19   66.89
   0  -4   3 1941.61   65.89
   0   4  -3 2041.90   66.59
   0   4  -3 2122.89   66.89
   0   4  -3 2073.59   65.99
  -1  -4   3  274.67   11.10
  -1  -4   3  270.67   10.80
  -1  -4   3  273.87   10.10
  -1  -4   3  287.07   11.20
  -1  -4   3  283.67   10.00
   1   4  -3  285.97   10.90
   1   4  -3  278.17   10.80
   1   4  -3  282.87   10.70
  -2  -4   3  404.36   14.40
  -2  -4   3  394.06   14.20
   2   4  -3  406.76   15.00
  -3  -4   3  191.78    8.60
  -3  -4   3  206.78    8.50
  -4  -4   3  226.08    9.80
  -7   4  -4   11.00    2.00
  -7   4  -4   12.00    2.20
  -7   4  -4   12.80    2.10
  -7   4  -4    9.30    1.90
  -6   4  -4    9.90    2.30
  -6   4  -4   11.80    2.30
  -6   4  -4   14.40    2.70
  -6   4  -4   14.70    2.30
  -6   4  -4   14.60    2.60
  -6   4  -4    8.10    2.10
  -6   4  -4   13.70    2.60
  -6   4  -4   12.80    2.40
   5  -4   4  478.35   19.10
   5  -4   4  469.65   19.20
  -5   4  -4  465.85   18.90
  -5   4  -4  466.55   16.70
  -5   4  -4  452.15   19.90
  -5   4  -4  464.95   19.80
  -5   4  -4  471.75   16.90
   4  -4   4   54.79    5.10
  -4   4  -4   51.49    4.80
  -4   4  -4   59.29    5.50
  -4   4  -4   52.99    4.70
  -4   4  -4   51.89    5.40
  -4   4  -4   51.49    3.50
   3  -4   4  331.97   13.40
  -3   4  -4  346.37   13.20
  -3   4  -4  328.57   13.80
  -3   4  -4  348.97   13.90
  -3   4  -4  339.87   13.10
   2  -4   4  338.47   12.60
   2  -4   4  342.77   12.40
  -2   4  -4  327.47   13.00
  -2   4  -4  347.87   13.10
  -2   4  -4  343.37   12.40
  -2   4  -4  352.66   12.60
   1  -4   4    1.30    1.10
   1  -4   4    0.30    1.10
   1  -4   4    1.60    1.70
  -1   4  -4    1.40    1.40
  -1   4  -4    0.70    1.20
  -1   4  -4    1.10    1.60
  -1   4  -4    2.30    1.10
   0  -4   4  231.28    8.60
   0  -4   4  212.68   10.20
   0  -4   4  232.38   10.60
   0  -4   4  213.68    8.10
   0   4  -4  237.48   10.50
   0   4  -4  235.18    9.70
   0   4  -4  210.58   10.20
  -1  -4   4    1.60    1.20
  -1  -4   4    2.10    1.20
  -1  -4   4    1.40    1.10
   1   4  -4    2.30    1.40
  -2  -4   4  116.69    5.50
  -2  -4   4  115.29    5.80
  -3  -4   4   36.40    3.20
  -3  -4   4   43.80    3.90
  -3  -4   4   40.80    3.50
  -4  -4   4   80.59    5.80
  -4  -4   4   80.19    4.30
  -4  -4   4   81.89    5.60
   7  -4   5   31.90    2.70
  -7   4  -5   28.30    2.70
  -7   4  -5   27.70    2.70
  -7   4  -5   31.20    2.80
  -7   4  -5   28.80    2.80
  -7   4  -5   29.60    2.70
  -6   4  -5   26.90    3.00
  -6   4  -5   27.00    3.20
  -6   4  -5   30.80    3.10
  -6   4  -5   21.60    2.80
  -6   4  -5   32.70    3.40
  -6   4  -5   28.30    3.20
   5  -4   5   39.10    5.80
   5  -4   5   32.60    5.30
  -5   4  -5   34.40    3.50
  -5   4  -5   34.30    3.60
  -5   4  -5   35.80    4.80
  -5   4  -5   34.30    3.60
  -5   4  -5   25.20    3.10
  -5   4  -5   32.50    5.50
  -5   4  -5   28.00    3.00
  -5   4  -5   40.20    3.60
  -5   4  -5   35.60    3.70
  -5   4  -5   30.50    5.20
  -5   4  -5   29.80    3.20
   4  -4   5   -0.30    2.20
   4  -4   5   -4.30    1.90
  -4   4  -5    2.50    2.20
  -4   4  -5    0.40    2.20
  -4   4  -5   -0.60    2.30
  -4   4  -5    1.80    1.30
  -4   4  -5    0.40    1.40
   3  -4   5    3.60    1.10
   3  -4   5    4.10    2.00
  -3   4  -5    4.70    1.90
  -3   4  -5    6.00    2.20
  -3   4  -5    5.50    2.30
  -3   4  -5    2.60    1.20
   2  -4   5 1558.84   49.30
   2  -4   5 1485.45   49.60
  -2   4  -5 1506.55   49.20
  -2   4  -5 1515.65   50.09
  -2   4  -5 1586.04   50.09
   1  -4   5  182.88    7.50
   1  -4   5  191.38    7.50
  -1   4  -5  173.28    7.60
   0  -4   5 1380.96   43.90
   0  -4   5 1348.27   43.40
   0  -4   5 1398.96   43.40
   0  -4   5 1344.47   46.70
   0   4  -5 1353.76   45.10
   0   4  -5 1386.86   48.20
   0   4  -5 1293.57   43.50
  -1  -4   5 1923.81   61.29
  -1  -4   5 1974.90   61.69
   1   4  -5 1882.31   62.89
  -2  -4   5   84.19    4.70
  -2  -4   5   77.79    4.50
  -2  -4   5   82.09    5.00
   2   4  -5   79.29    4.50
  -3  -4   5  248.98   10.80
  -3  -4   5  248.58   10.00
  -3  -4   5  236.48   10.20
   3   4  -5  231.88    9.90
  -4  -4   5   92.89    6.20
  -4  -4   5  106.89    6.90
  -4  -4   5   98.29    5.00
   4   4  -5   98.79    6.60
   7  -4   6    6.00    1.50
  -7   4  -6    4.80    1.40
  -7   4  -6    5.20    1.40
  -7   4  -6    3.10    1.50
  -7   4  -6    2.90    1.40
  -7   4  -6    4.80    1.40
  -6   4  -6    0.60    1.60
  -6   4  -6    1.10    1.50
  -6   4  -6   -0.40    1.60
  -6   4  -6   -0.90    1.60
  -6   4  -6    2.70    1.60
  -6   4  -6    2.20    1.60
  -5   4  -6   15.20    2.60
  -5   4  -6   21.80    2.70
  -5   4  -6   18.00    2.60
  -5   4  -6   17.50    2.60
  -5   4  -6   19.00    2.80
  -5   4  -6   25.20    2.90
  -5   4  -6   25.90    5.00
  -5   4  -6   18.60    2.80
  -5   4  -6   18.80    2.70
   4  -4   6   25.60    4.10
   4  -4   6   30.00    2.90
   4  -4   6   27.30    4.00
  -4   4  -6   28.00    3.20
  -4   4  -6   20.70    2.60
  -4   4  -6   24.10    4.30
  -4   4  -6   25.80    3.80
  -4   4  -6   27.50    4.80
   3  -4   6   25.80    3.50
   3  -4   6   38.90    4.30
   3  -4   6   30.10    2.60
  -3   4  -6   27.70    4.20
  -3   4  -6   32.50    3.70
  -3   4  -6   34.20    4.40
   2  -4   6    7.30    2.00
  -2   4  -6    8.30    2.40
   1  -4   6    2.30    1.40
   1  -4   6    1.90    1.40
  -1   4  -6    0.30    1.20
   0  -4   6  806.12   27.40
   0  -4   6  860.81   27.50
   0  -4   6  868.81   28.00
   0   4  -6  824.02   27.80
   0   4  -6  800.22   27.50
  -1  -4   6    2.60    1.40
  -1  -4   6    1.40    1.50
   1   4  -6    3.00    1.50
   1   4  -6    4.00    1.60
  -2  -4   6  112.09    6.30
  -2  -4   6  114.19    5.90
  -2  -4   6  109.99    5.70
   2   4  -6  115.39    5.80
  -3  -4   6   15.50    2.10
  -3  -4   6   15.90    2.80
  -3  -4   6   15.30    3.20
  -3  -4   6   12.30    2.50
   3   4  -6   12.10    2.70
   3   4  -6   12.40    2.50
  -4  -4   6  177.78    9.70
  -4  -4   6  166.08    8.90
  -4  -4   6  178.68    7.50
  -4  -4   6  168.68    8.70
   4   4  -6  171.18    9.20
   4   4  -6  172.58    8.60
  -5  -4   6   21.40    2.80
  -5  -4   6   21.50    4.40
   7  -4   7   -0.20    1.10
  -7   4  -7    0.80    1.10
  -7   4  -7    1.90    1.00
  -7   4  -7   -1.20    1.10
  -7   4  -7    1.70    1.10
  -7   4  -7    2.00    1.10
  -6   4  -7   14.20    2.20
  -6   4  -7   12.00    2.10
  -6   4  -7   13.50    2.20
  -6   4  -7   12.90    2.10
  -6   4  -7   12.90    2.20
   5  -4   7   27.00    2.90
  -5   4  -7   24.10    3.20
  -5   4  -7   21.30    2.80
  -5   4  -7   21.80    2.80
  -5   4  -7   15.80    2.60
  -5   4  -7   21.60    2.80
  -5   4  -7   19.30    2.60
  -5   4  -7   23.70    2.80
  -5   4  -7   28.60    3.00
  -5   4  -7   22.40    2.90
   4  -4   7   81.19    6.60
   4  -4   7   89.89    4.70
  -4   4  -7   83.79    7.20
  -4   4  -7   92.09    5.30
  -4   4  -7   93.59    7.60
  -4   4  -7  102.89    8.00
   3  -4   7   51.99    4.80
   3  -4   7   49.00    3.30
  -3   4  -7   54.69    6.10
   2  -4   7    1.00    1.00
   2  -4   7    1.30    1.60
  -2   4  -7    1.50    1.90
   1  -4   7  195.38    8.60
   1  -4   7  204.48    8.80
  -1   4  -7  202.38    9.00
   0  -4   7  767.22   26.50
   0  -4   7  741.53   26.10
   0  -4   7  783.42   28.10
   0   4  -7  808.82   26.50
  -1  -4   7  121.79    6.50
  -1  -4   7  107.89    5.90
   1   4  -7  119.99    6.20
   1   4  -7  124.39    6.10
  -2  -4   7    1.90    1.30
  -2  -4   7    1.80    1.70
  -2  -4   7    1.50    1.60
  -2  -4   7   -0.20    1.30
   2   4  -7    4.70    1.80
   2   4  -7    0.20    1.40
  -3  -4   7  380.16   16.00
  -3  -4   7  391.36   15.30
  -3  -4   7  353.46   14.70
  -3  -4   7  384.96   13.70
   3   4  -7  358.66   14.70
   3   4  -7  402.26   15.70
  -4  -4   7   10.50    3.00
  -4  -4   7   10.80    2.90
  -4  -4   7   16.70    3.70
  -4  -4   7   16.90    2.70
   4   4  -7   16.30    3.30
   4   4  -7   15.40    3.10
  -5  -4   7   52.79    4.10
  -5  -4   7   57.59    4.00
  -5  -4   7   51.99    4.50
  -5  -4   7   55.49    4.20
  -5  -4   7   52.59    4.20
  -6  -4   7    4.10    2.40
   6  -4   8    2.60    1.60
  -6   4  -8   -2.10    1.30
  -6   4  -8   -0.30    1.40
  -6   4  -8    0.20    1.40
  -6   4  -8    1.80    1.30
  -6   4  -8   -1.60    1.30
   5  -4   8    0.90    1.70
  -5   4  -8    1.00    1.50
  -5   4  -8    2.60    1.70
  -5   4  -8    0.70    1.60
  -5   4  -8    2.30    2.00
  -5   4  -8    3.00    1.70
   4  -4   8    1.10    1.60
   4  -4   8    2.30    1.60
  -4   4  -8    3.10    1.90
  -4   4  -8    3.40    1.80
  -4   4  -8    0.90    3.30
  -4   4  -8    1.80    1.70
  -4   4  -8   -1.30    1.60
  -4   4  -8    3.30    1.80
  -4   4  -8    2.20    1.70
   3  -4   8  265.77   10.20
   3  -4   8  277.67   12.30
  -3   4  -8  265.07   13.20
  -3   4  -8  277.07   10.80
   2  -4   8    0.50    1.10
   2  -4   8    2.80    2.20
  -2   4  -8   -0.30    2.10
   1  -4   8  289.37   11.50
   1  -4   8  254.97    9.70
  -1   4  -8  282.67   11.80
   0  -4   8  100.29    5.60
   0  -4   8   95.49    5.80
   0  -4   8   90.99    4.30
   0   4  -8   93.99    5.60
  -1  -4   8    5.60    2.20
  -1  -4   8    5.60    1.40
  -1  -4   8    4.30    1.90
   1   4  -8    3.90    1.70
   1   4  -8    4.30    1.80
  -2  -4   8   79.09    5.80
  -2  -4   8   73.69    5.30
  -2  -4   8   74.69    4.20
   2   4  -8   68.59    5.00
   2   4  -8   73.29    5.40
  -3  -4   8    1.20    1.30
  -3  -4   8    0.00    2.00
  -3  -4   8    0.40    2.40
  -3  -4   8   -1.60    1.80
   3   4  -8    0.90    2.10
   3   4  -8    1.90    1.80
  -4  -4   8   36.50    4.60
  -4  -4   8   47.20    3.40
  -4  -4   8   38.10    5.20
  -4  -4   8   43.00    5.90
  -4  -4   8   46.20    3.80
   4   4  -8   41.90    5.20
   4   4  -8   49.10    5.10
  -5  -4   8  374.56   13.60
  -5  -4   8  372.26   13.80
  -5  -4   8  359.16   13.80
  -5  -4   8  358.56   14.00
  -5  -4   8  360.86   13.60
  -6  -4   8   48.80    3.50
  -6  -4   8   46.70    3.60
  -6  -4   8   47.20    3.40
   6  -4   9   33.80    2.80
  -6   4  -9   35.10    2.80
  -6   4  -9   33.80    2.70
  -6   4  -9   33.40    2.70
   5  -4   9    9.90    2.10
   5  -4   9   10.00    2.00
  -5   4  -9    7.30    2.00
  -5   4  -9    9.90    2.10
  -5   4  -9   12.40    2.00
  -5   4  -9   10.20    2.00
   4  -4   9   25.80    3.10
   4  -4   9   25.50    2.70
  -4   4  -9   27.10    3.10
  -4   4  -9   27.80    3.10
  -4   4  -9   26.90    5.10
  -4   4  -9   34.20    3.50
  -4   4  -9   31.00    3.20
  -4   4  -9   27.50    3.00
   3  -4   9   11.20    3.20
   3  -4   9    5.90    1.80
  -3   4  -9    5.60    3.00
  -3   4  -9    9.90    2.20
   2  -4   9   13.50    2.10
   2  -4   9   11.60    3.10
  -2   4  -9   11.10    2.20
  -2   4  -9   14.60    3.50
   1  -4   9   29.60    2.70
   1  -4   9   29.10    3.70
  -1   4  -9   38.30    4.50
   0  -4   9  134.79    7.40
   0  -4   9  121.39    5.40
   0  -4   9  128.29    7.80
   0   4  -9  123.39    7.00
  -1  -4   9    3.20    1.30
  -1  -4   9   -0.30    1.80
  -1  -4   9   -0.20    1.90
   1   4  -9    1.30    1.60
   1   4  -9    0.50    1.90
  -2  -4   9   67.99    5.90
  -2  -4   9   75.99    5.70
  -2  -4   9   63.79    4.00
   2   4  -9   75.79    5.70
   2   4  -9   73.39    5.30
  -3  -4   9  108.49    7.90
  -3  -4   9  111.09    5.80
  -3  -4   9  120.59    7.60
  -3  -4   9  109.69    5.30
   3   4  -9  111.99    7.60
   3   4  -9  120.19    7.10
  -4  -4   9  247.68   12.90
  -4  -4   9  233.98   12.00
  -4  -4   9  228.48    9.80
  -4  -4   9  233.98   10.10
  -4  -4   9  246.88   11.10
  -4  -4   9  221.58   11.20
  -4  -4   9  225.28   10.00
  -4  -4   9  232.38    9.20
  -4  -4   9  236.28    9.90
   4   4  -9  237.98   12.10
   4   4  -9  249.68   11.30
  -5  -4   9   -0.90    1.90
  -5  -4   9    0.70    1.70
  -5  -4   9   -0.70    1.60
  -5  -4   9   -2.40    1.50
  -5  -4   9    0.20    1.60
  -6  -4   9   74.99    4.40
  -6  -4   9   75.49    4.20
  -6  -4   9   74.79    4.20
   6  -4  10    1.80    1.20
  -6   4 -10    1.40    1.00
  -6   4 -10    1.80    1.10
  -6   4 -10    0.10    1.00
   5  -4  10    2.90    1.50
   5  -4  10    7.30    1.90
  -5   4 -10    4.90    1.70
  -5   4 -10    4.60    1.70
  -5   4 -10    5.40    1.70
   4  -4  10    2.10    1.60
   4  -4  10    2.20    1.70
  -4   4 -10    1.80    1.70
  -4   4 -10    2.60    1.70
  -4   4 -10    0.00    1.60
  -4   4 -10    4.90    1.90
   3  -4  10   14.90    2.60
   3  -4  10   25.80    2.80
  -3   4 -10   21.40    2.60
  -3   4 -10   23.40    2.90
  -3   4 -10   22.70    2.70
  -3   4 -10   24.80    2.90
  -3   4 -10   21.00    2.70
  -3   4 -10   18.10    4.50
   2  -4  10   54.39    5.70
   2  -4  10   62.29    4.10
  -2   4 -10   67.49    4.40
  -2   4 -10   57.09    6.40
   1  -4  10  318.57   14.00
   1  -4  10  346.17   12.30
  -1   4 -10  324.87   14.50
  -1   4 -10  331.67   12.20
   0  -4  10  182.68    7.20
   0  -4  10  161.88    6.90
   0   4 -10  168.38    8.90
   0   4 -10  162.18    7.00
  -1  -4  10    6.80    3.00
  -1  -4  10    4.70    1.50
  -1  -4  10    2.00    1.30
   1   4 -10    3.10    2.30
   1   4 -10    7.10    2.50
   1   4 -10    5.10    1.40
  -2  -4  10    6.20    1.70
  -2  -4  10   10.20    3.30
  -2  -4  10    8.20    1.90
   2   4 -10   11.90    2.70
   2   4 -10    7.80    1.70
   2   4 -10   14.40    3.30
  -3  -4  10   64.79    6.40
  -3  -4  10   64.79    6.70
  -3  -4  10   72.99    4.10
  -3  -4  10   67.69    4.50
   3   4 -10   67.59    4.00
   3   4 -10   69.09    6.30
   3   4 -10   71.19    5.90
  -4  -4  10  213.18    9.10
  -4  -4  10  216.48    9.00
  -4  -4  10  213.48    8.50
  -4  -4  10  209.58    9.10
  -4  -4  10  199.48    8.70
  -4  -4  10  222.78    9.30
  -4  -4  10  200.88    8.20
  -4  -4  10  217.18    9.70
   4   4 -10  220.18   10.70
  -5  -4  10    2.30    1.80
  -5  -4  10    4.00    1.70
  -5  -4  10    4.10    1.80
  -5  -4  10    1.20    1.70
  -5  -4  10    0.60    1.70
  -5  -4  10    2.70    1.40
  -5  -4  10    2.10    1.40
   5   4 -10    0.40    1.30
  -6  -4  10   30.80    2.90
  -6  -4  10   28.70    2.80
  -6  -4  10   30.70    2.80
  -6  -4  10   31.50    3.10
   5  -4  11   23.20    2.30
   5  -4  11   25.90    2.50
  -5   4 -11   27.70    2.40
  -5   4 -11   19.10    2.10
  -5   4 -11   28.90    2.40
   4  -4  11    5.50    2.00
   4  -4  11    2.10    1.80
   4  -4  11    3.60    1.60
  -4   4 -11    3.20    1.60
  -4   4 -11    3.00    1.60
  -4   4 -11    3.00    1.60
  -4   4 -11    2.10    1.70
  -4   4 -11    3.30    1.60
  -4   4 -11    2.00    1.50
   3  -4  11   36.70    3.40
   3  -4  11   34.60    3.40
   3  -4  11   38.50    3.80
  -3   4 -11   38.60    5.70
  -3   4 -11   35.40    3.30
  -3   4 -11   39.90    3.70
  -3   4 -11   31.40    3.00
  -3   4 -11   38.00    3.70
   2  -4  11  172.78    7.60
   2  -4  11  162.98    7.30
   2  -4  11  165.28    7.40
  -2   4 -11  162.88    6.90
  -2   4 -11  184.28   10.40
  -2   4 -11  162.18    7.20
  -2   4 -11  161.58    7.50
  -2   4 -11  173.98    7.60
   1  -4  11   -3.00    1.20
  -1   4 -11   -0.70    2.60
  -1   4 -11   -0.60    1.30
   0  -4  11  147.49    6.60
   0   4 -11  148.89    6.60
   0   4 -11  147.99    8.60
  -1  -4  11    3.70    1.50
  -1  -4  11    5.50    2.90
   1   4 -11    5.60    2.50
   1   4 -11    5.30    1.60
  -2  -4  11  406.36   14.70
  -2  -4  11  390.36   17.60
  -2  -4  11  406.66   14.40
   2   4 -11  380.16   16.80
   2   4 -11  404.56   16.70
   2   4 -11  411.16   14.40
  -3  -4  11  237.98    9.70
  -3  -4  11  248.08   10.10
  -3  -4  11  254.77   10.20
  -3  -4  11  247.78    9.60
  -3  -4  11  243.58   10.20
  -3  -4  11  252.87    9.40
  -3  -4  11  251.07   10.00
  -3  -4  11  248.88   10.70
   3   4 -11  254.27   11.70
   3   4 -11  234.98    9.50
  -4  -4  11   84.69    4.30
  -4  -4  11  100.69    5.90
  -4  -4  11   92.09    5.00
  -4  -4  11   81.39    5.30
  -4  -4  11   91.49    5.30
  -4  -4  11   96.49    5.20
  -4  -4  11   80.39    4.50
  -4  -4  11   80.09    5.00
   4   4 -11   96.09    6.70
   4   4 -11   76.69    4.40
  -5  -4  11  149.59    6.50
  -5  -4  11  144.49    5.90
  -5  -4  11  133.39    6.00
  -5  -4  11  141.19    6.60
  -5  -4  11  142.79    6.70
  -5  -4  11  144.59    6.90
  -5  -4  11  142.99    6.50
   5   4 -11  155.38    6.10
  -6  -4  11   15.60    2.00
  -6  -4  11   11.70    2.00
  -6  -4  11   12.40    1.70
  -6  -4  11   16.10    1.90
   5  -4  12    0.00    1.10
   5  -4  12   -0.10    1.10
  -5   4 -12    0.90    1.00
  -5   4 -12   -0.30    0.90
   4  -4  12   -0.10    1.50
   4  -4  12   -0.20    1.50
  -4   4 -12    1.50    1.20
  -4   4 -12    0.50    1.30
   3  -4  12   81.39    4.70
   3  -4  12   69.39    4.30
   3  -4  12   75.59    4.40
  -3   4 -12   76.29    3.90
  -3   4 -12   64.49    4.20
  -3   4 -12   72.79    4.50
  -3   4 -12   71.59    4.60
   2  -4  12  133.39    6.60
   2  -4  12  133.39    6.40
   2  -4  12  135.49    6.30
  -2   4 -12  130.79    6.50
  -2   4 -12  131.79    6.20
  -2   4 -12  139.99    9.00
  -2   4 -12  137.39    5.60
  -2   4 -12  134.29    6.50
   1  -4  12  356.36   12.50
   1  -4  12  356.46   13.40
   1  -4  12  362.26   13.40
   1  -4  12  350.06   13.20
  -1   4 -12  367.06   12.10
  -1   4 -12  375.76   13.50
  -1   4 -12  366.96   13.20
  -1   4 -12  356.86   16.10
   0  -4  12   17.90    2.60
   0  -4  12   22.60    2.70
   0  -4  12   20.40    2.40
   0  -4  12   24.70    3.00
   0  -4  12   20.80    2.40
   0   4 -12   21.20    2.70
   0   4 -12   20.40    2.40
   0   4 -12   26.20    4.40
  -1  -4  12   48.40    4.30
  -1  -4  12   54.29    3.50
  -1  -4  12   49.40    4.30
  -1  -4  12   51.29    3.80
   1   4 -12   47.80    3.60
   1   4 -12   48.60    3.40
   1   4 -12   45.60    5.50
  -2  -4  12   28.90    3.40
  -2  -4  12   28.60    3.00
  -2  -4  12   33.20    2.90
  -2  -4  12   29.40    2.90
  -2  -4  12   27.00    3.50
  -2  -4  12   29.70    3.30
   2   4 -12   28.30    2.80
   2   4 -12   25.30    4.20
  -3  -4  12   46.20    3.40
  -3  -4  12   41.60    4.10
  -3  -4  12   37.00    3.30
  -3  -4  12   40.10    3.10
  -3  -4  12   37.40    3.50
  -3  -4  12   36.60    3.60
  -3  -4  12   44.30    3.70
  -3  -4  12   47.90    4.30
   3   4 -12   41.70    5.20
   3   4 -12   43.80    3.30
  -4  -4  12   96.29    5.00
  -4  -4  12   91.39    5.60
  -4  -4  12   87.49    4.80
  -4  -4  12   89.59    4.40
  -4  -4  12   88.59    5.20
  -4  -4  12   91.19    4.60
  -4  -4  12   96.59    5.40
  -4  -4  12   91.69    5.00
   4   4 -12   88.99    4.60
  -5  -4  12    5.60    1.60
  -5  -4  12    3.60    1.90
  -5  -4  12    2.90    1.30
  -5  -4  12    1.10    1.50
  -5  -4  12    2.80    1.60
  -5  -4  12    3.10    1.20
  -5  -4  12    4.20    1.50
   5   4 -12    4.00    1.30
  -6  -4  12    0.50    1.00
  -6  -4  12   -0.30    1.10
  -6  -4  12    0.90    1.10
  -6  -4  12    1.60    1.10
   4  -4  13   53.89    3.40
  -4   4 -13   60.99    2.80
   3  -4  13   17.50    2.30
   3  -4  13   17.10    2.30
  -3   4 -13   19.10    2.50
  -3   4 -13   15.20    1.60
  -3   4 -13   19.30    2.30
   2  -4  13   -1.30    1.60
   2  -4  13    0.30    1.60
   2  -4  13    0.00    1.70
  -2   4 -13    1.60    1.50
  -2   4 -13   -0.60    1.40
  -2   4 -13    0.40    0.90
   1  -4  13  231.78    9.20
   1  -4  13  215.78    8.90
   1  -4  13  228.28    9.00
   1  -4  13  222.98    7.90
  -1   4 -13  212.88    9.00
  -1   4 -13  228.28    8.90
  -1   4 -13  210.08   14.90
   0  -4  13   62.79    4.40
   0  -4  13   52.09    3.70
   0  -4  13   56.79    4.30
   0  -4  13   53.39    3.50
   0  -4  13   54.39    3.80
   0   4 -13   46.00    5.80
   0   4 -13   60.89    4.00
   0   4 -13   53.89    3.70
  -1  -4  13   -1.20    1.80
  -1  -4  13    2.20    1.50
  -1  -4  13    4.20    1.70
  -1  -4  13    1.60    1.90
   1   4 -13    0.60    1.40
   1   4 -13    2.50    1.50
   1   4 -13    0.80    2.50
  -2  -4  13    0.60    1.80
  -2  -4  13    0.40    1.80
  -2  -4  13   -1.70    1.70
  -2  -4  13    2.10    1.50
  -2  -4  13   -0.30    1.60
  -2  -4  13   -1.30    1.20
   2   4 -13    0.30    1.40
   2   4 -13    1.50    1.40
   2   4 -13    2.40    2.90
  -3  -4  13    0.30    1.40
  -3  -4  13    1.60    1.40
  -3  -4  13   -1.80    1.60
  -3  -4  13   -0.60    1.50
  -3  -4  13   -1.00    1.70
  -3  -4  13   -0.60    1.60
  -3  -4  13    0.90    1.50
  -3  -4  13   -0.50    1.30
   3   4 -13   -0.90    1.30
   3   4 -13    0.90    1.40
  -4  -4  13    9.00    1.50
  -4  -4  13    7.30    2.10
  -4  -4  13    8.80    1.90
  -4  -4  13    9.40    1.80
  -4  -4  13    6.40    2.00
  -4  -4  13    7.60    1.60
  -4  -4  13    7.80    1.80
   4   4 -13   10.20    1.70
  -5  -4  13   10.00    1.40
  -5  -4  13    9.20    1.50
  -5  -4  13    9.50    1.60
  -5  -4  13   10.40    1.90
  -5  -4  13    7.00    1.50
  -5  -4  13    9.90    1.80
   5   4 -13   10.80    1.40
   3  -4  14   37.40    2.90
   3  -4  14   34.10    2.80
  -3   4 -14   32.20    2.40
   2  -4  14   84.79    4.60
   2  -4  14   92.69    4.70
  -2   4 -14   89.29    4.40
  -2   4 -14   85.99    4.60
   1  -4  14    2.10    1.70
   1  -4  14    2.70    1.90
   1  -4  14    4.40    1.70
  -1   4 -14    3.30    1.50
  -1   4 -14    1.90    1.50
   0  -4  14   -1.30    1.70
   0  -4  14   -0.30    1.70
   0  -4  14    1.00    1.30
   0   4 -14    1.50    1.40
   0   4 -14   -2.00    1.20
  -1  -4  14  103.39    5.00
  -1  -4  14  103.19    5.50
  -1  -4  14  103.79    5.50
  -1  -4  14  105.79    5.10
   1   4 -14   98.89    5.20
   1   4 -14  119.99    5.30
  -2  -4  14   -2.20    1.10
  -2  -4  14    3.00    1.80
  -2  -4  14   -0.20    1.70
  -2  -4  14    1.00    1.70
   2   4 -14   -1.30    1.10
   2   4 -14    1.20    1.30
  -3  -4  14   17.90    2.20
  -3  -4  14   19.20    2.60
  -3  -4  14   19.50    2.00
  -3  -4  14   19.40    2.30
  -3  -4  14   14.60    2.20
   3   4 -14   19.90    2.10
   3   4 -14   19.00    2.20
  -4  -4  14    2.90    1.30
  -4  -4  14    0.90    1.50
  -4  -4  14    2.90    1.10
  -4  -4  14    5.10    1.60
  -4  -4  14    5.50    1.50
  -4  -4  14    2.10    1.30
  -4  -4  14    1.80    1.20
   4   4 -14    2.80    1.10
   4   4 -14    0.50    1.00
  -5  -4  14    5.60    1.30
  -5  -4  14    9.40    1.30
  -5  -4  14    7.80    1.30
  -5  -4  14    8.90    1.30
   3  -4  15   13.20    1.40
   2  -4  15    4.80    1.50
   2  -4  15    4.00    1.40
  -2   4 -15    2.90    1.20
   1  -4  15  165.08    6.70
  -1   4 -15  156.28    6.30
  -1   4 -15  145.69    6.60
   0  -4  15   41.60    3.30
   0  -4  15   39.10    2.30
   0  -4  15   37.80    3.30
   0   4 -15   40.60    2.90
   0   4 -15   40.80    3.20
  -1  -4  15   70.99    3.70
  -1  -4  15   69.69    4.20
  -1  -4  15   62.59    4.10
  -1  -4  15   65.49    3.60
   1   4 -15   65.09    3.90
   1   4 -15   66.29    3.60
  -2  -4  15   66.69    3.60
  -2  -4  15   69.69    3.80
  -2  -4  15   74.29    4.20
  -2  -4  15   73.39    4.10
   2   4 -15   69.99    3.70
   2   4 -15   66.59    3.80
  -3  -4  15    2.40    1.10
  -3  -4  15    2.70    1.40
  -3  -4  15    5.10    1.60
  -3  -4  15    2.80    1.30
   3   4 -15    1.40    1.10
   3   4 -15    1.60    1.10
  -4  -4  15    3.30    1.30
  -4  -4  15    6.60    1.20
  -4  -4  15    3.80    1.30
  -4  -4  15    5.40    1.10
   4   4 -15    7.00    1.10
   1  -4  16    2.90    1.30
  -1   4 -16    3.70    1.10
   0  -4  16   16.70    2.00
   0   4 -16   18.60    1.80
  -1  -4  16    1.70    1.30
  -1  -4  16    1.40    0.90
  -1  -4  16    1.40    1.30
   1   4 -16    0.20    1.00
  -2  -4  16   55.99    2.80
  -2  -4  16   54.49    3.10
  -2  -4  16   56.29    3.30
  -2  -4  16   53.39    2.90
   2   4 -16   54.59    2.90
  -3  -4  16    2.80    1.10
  -3  -4  16    3.70    1.20
  -3  -4  16    3.30    1.00
   3   4 -16    3.10    0.90
  -3   5  16   16.00    1.90
  -3   5  16   24.00    1.50
  -2   5  16    6.30    1.10
  -2   5  16    5.20    1.40
  -2   5  16    4.80    1.40
  -1   5  16    5.00    1.50
   0  -5 -16    3.20    1.20
   0   5  16    1.50    1.40
  -1  -5 -16   -1.00    1.00
   1   5  16   -1.10    1.10
   1   5  16    0.50    1.00
   4  -5 -15   10.70    1.50
  -4   5  15   11.70    1.80
  -4   5  15    6.60    1.40
  -4   5  15    8.90    1.30
   3  -5 -15   37.10    2.30
  -3   5  15   37.80    3.00
  -3   5  15   33.90    2.30
  -3   5  15   38.70    3.00
  -3   5  15   35.70    2.50
  -2   5  15    0.70    1.20
  -2   5  15    0.40    1.60
  -2   5  15    2.20    1.60
   1  -5 -15    4.30    1.50
  -1   5  15    6.60    1.20
  -1   5  15    7.70    2.00
  -1   5  15    6.70    1.90
   0  -5 -15   16.80    2.10
   0   5  15   14.80    2.20
  -1  -5 -15   47.70    3.10
   1   5  15   49.40    3.40
   1   5  15   45.80    3.30
  -2  -5 -15    0.20    1.10
   2   5  15    2.20    1.30
   2   5  15   -0.40    1.30
  -3  -5 -15    8.90    1.80
   3   5  15   12.90    1.50
  -5   5  14    3.50    1.10
   4  -5 -14    0.80    1.10
  -4   5  14    2.60    1.30
  -4   5  14    2.00    1.20
  -4   5  14    0.40    1.30
  -4   5  14    0.60    1.00
   3  -5 -14   -0.20    1.10
  -3   5  14    1.60    1.60
  -3   5  14    4.10    1.70
  -3   5  14    4.20    1.40
  -3   5  14    0.60    1.70
  -3   5  14    5.30    1.90
   2  -5 -14    2.10    1.50
  -2   5  14    5.40    1.60
  -2   5  14    4.10    1.90
  -2   5  14    3.60    2.00
   1  -5 -14   29.30    2.90
  -1   5  14   37.30    2.70
  -1   5  14   31.70    3.30
  -1   5  14   26.50    3.20
   0  -5 -14   36.10    3.20
   0   5  14   42.40    2.40
   0   5  14   44.50    3.70
  -1  -5 -14    3.40    1.60
   1   5  14    4.00    1.70
   1   5  14    5.80    1.90
  -2  -5 -14    3.40    1.40
   2   5  14    0.90    1.50
   2   5  14    4.30    1.60
  -3  -5 -14   20.60    2.10
  -3  -5 -14   15.60    1.60
   3   5  14   17.10    2.10
  -5   5  13    1.00    1.20
  -5   5  13   -1.20    0.90
  -5   5  13   -1.10    1.20
  -5   5  13    0.30    1.10
  -5   5  13    1.90    1.10
   4  -5 -13   13.10    1.80
  -4   5  13    7.10    1.90
  -4   5  13   11.20    2.10
  -4   5  13   11.30    1.80
  -4   5  13   13.50    1.70
  -4   5  13   13.50    1.90
   3  -5 -13  277.57   10.50
  -3   5  13  286.87   11.20
  -3   5  13  280.37   10.30
  -3   5  13  283.97   10.50
  -3   5  13  300.97   11.70
  -3   5  13  277.27   11.10
   2  -5 -13  149.69    6.70
   2  -5 -13  151.88    6.60
  -2   5  13  151.18    8.10
  -2   5  13  158.98    7.80
  -2   5  13  161.28    7.40
  -2   5  13  161.28    6.80
  -2   5  13  172.88    6.80
  -2   5  13  159.48    6.50
   1  -5 -13   44.80    3.40
  -1   5  13   48.50    3.30
  -1   5  13   43.50    4.00
  -1   5  13   41.80    4.20
   0  -5 -13   20.90    2.50
   0   5  13   21.90    2.20
   0   5  13   16.20    2.70
  -1  -5 -13    2.70    1.10
  -1  -5 -13    2.80    1.70
   1   5  13    5.70    2.00
   1   5  13    2.50    1.80
  -2  -5 -13    0.30    1.40
  -2  -5 -13    0.40    1.10
   2   5  13    3.00    1.80
   2   5  13   -0.20    1.50
  -3  -5 -13    4.80    1.30
  -3  -5 -13    2.00    1.50
   3   5  13    2.70    1.50
  -4  -5 -13   28.80    2.40
  -4  -5 -13   26.90    2.10
  -4  -5 -13   27.80    2.50
   4   5  13   27.70    2.50
   4   5  13   23.10    2.20
  -6   5  12   -0.60    0.90
  -6   5  12    0.90    0.80
  -6   5  12    1.00    1.00
  -6   5  12    0.30    1.00
  -5   5  12   32.40    2.80
  -5   5  12   25.20    2.80
  -5   5  12   25.60    2.80
  -5   5  12   29.00    2.50
  -5   5  12   31.20    2.90
  -5   5  12   31.60    2.60
  -4   5  12   36.60    3.30
  -4   5  12   39.10    3.30
  -4   5  12   36.30    3.70
  -4   5  12   44.60    3.30
  -4   5  12   39.70    3.90
  -4   5  12   36.70    3.60
  -4   5  12   36.40    3.00
   3  -5 -12    8.70    1.90
   3  -5 -12    6.80    1.70
   3  -5 -12    3.10    2.70
  -3   5  12    9.70    2.40
  -3   5  12    4.60    2.40
  -3   5  12    7.80    1.70
  -3   5  12    5.60    1.70
  -3   5  12    5.20    1.60
  -3   5  12    4.60    2.00
   2  -5 -12   48.10    3.50
   2  -5 -12   47.10    3.50
   2  -5 -12   49.50    5.40
  -2   5  12   57.69    4.70
  -2   5  12   56.49    3.70
  -2   5  12   60.49    4.30
  -2   5  12   64.19    4.40
  -2   5  12   47.70    3.30
  -2   5  12   50.49    3.60
   1  -5 -12   89.59    4.80
  -1   5  12   89.29    5.40
  -1   5  12   83.39    4.50
  -1   5  12   91.69    5.60
   0  -5 -12  431.36   15.70
   0   5  12  454.05   16.10
   0   5  12  445.26   15.20
  -1  -5 -12   38.30    3.30
  -1  -5 -12   38.20    2.70
  -1  -5 -12   33.30    3.30
   1   5  12   37.70    3.50
   1   5  12   35.50    3.30
  -2  -5 -12   -1.10    1.40
  -2  -5 -12    0.00    1.20
  -2  -5 -12    1.20    1.50
   2   5  12   -0.50    1.60
   2   5  12   -0.80    1.50
  -3  -5 -12    5.30    1.90
  -3  -5 -12    8.20    1.90
  -3  -5 -12   10.90    2.00
  -3  -5 -12    9.90    1.80
   3   5  12   10.40    2.10
   3   5  12    8.70    1.90
   3   5  12    9.60    2.10
  -4  -5 -12   58.89    3.60
  -4  -5 -12   62.29    3.70
  -4  -5 -12   57.89    3.80
  -4  -5 -12   63.99    3.50
  -4  -5 -12   64.19    3.80
   4   5  12   67.79    3.70
   4   5  12   61.19    3.70
  -5  -5 -12   18.20    1.80
  -5  -5 -12   17.80    1.80
  -5  -5 -12   17.20    1.80
  -5  -5 -12   14.90    2.30
   5   5  12   15.00    1.70
   5   5  12   14.70    1.60
  -6   5  11    7.10    1.30
  -6   5  11    4.40    1.40
  -6   5  11    5.50    1.60
  -6   5  11    4.70    1.40
  -5   5  11   16.80    2.60
  -5   5  11   12.60    2.20
  -5   5  11   15.30    2.30
  -5   5  11   13.80    2.40
  -5   5  11   14.10    2.00
  -5   5  11   16.80    2.20
   4  -5 -11   10.10    1.90
   4  -5 -11   15.50    5.20
  -4   5  11   11.50    2.70
  -4   5  11   11.50    2.70
  -4   5  11   12.80    2.60
  -4   5  11    7.60    2.10
  -4   5  11   11.70    2.00
  -4   5  11   14.20    2.20
  -4   5  11   11.70    2.30
  -4   5  11   10.60    1.90
  -4   5  11    8.60    5.70
   3  -5 -11  111.79    7.60
   3  -5 -11  110.59    5.40
  -3   5  11  110.29    6.20
  -3   5  11  112.19    5.40
  -3   5  11  103.59    5.50
  -3   5  11  114.09    6.40
  -3   5  11  115.09    5.50
  -3   5  11  122.89    7.90
  -3   5  11  110.69    6.10
  -3   5  11  117.59    6.50
   2  -5 -11   34.40    4.70
   2  -5 -11   29.60    4.60
  -2   5  11   27.80    4.90
  -2   5  11   29.80    3.40
  -2   5  11   31.50    2.90
   1  -5 -11  104.59    7.30
  -1   5  11   96.09    7.60
   0  -5 -11    5.90    3.00
   0   5  11    3.80    3.00
   1   5  11    5.00    2.80
  -2  -5 -11   73.49    4.40
  -2  -5 -11   80.19    4.30
  -2  -5 -11   76.69    4.70
   2   5  11   80.89    4.50
   2   5  11   78.19    4.80
   2   5  11   70.59    4.80
  -3  -5 -11   66.99    4.10
  -3  -5 -11   69.29    4.40
  -3  -5 -11   80.09    4.60
  -3  -5 -11   78.19    4.40
  -3  -5 -11   66.19    4.40
   3   5  11   70.49    4.60
   3   5  11   74.59    4.50
  -4  -5 -11    1.70    1.50
  -4  -5 -11   -1.00    1.20
  -4  -5 -11   -1.20    1.30
  -4  -5 -11   -0.60    1.30
   4   5  11    0.70    1.40
   4   5  11   -1.10    1.60
   4   5  11    1.30    1.50
  -5  -5 -11    7.20    2.30
  -5  -5 -11    5.80    1.50
  -5  -5 -11    7.50    1.60
  -5  -5 -11    5.00    1.50
  -5  -5 -11    4.20    1.30
   5   5  11    5.90    1.30
   5   5  11    8.30    1.70
  -6   5  10   68.49    4.00
  -6   5  10   73.69    3.90
  -6   5  10   69.69    3.60
  -6   5  10   66.79    4.00
  -6   5  10   67.89    4.00
  -5   5  10  147.59    6.40
  -5   5  10  156.58    7.40
  -5   5  10  147.59    7.10
  -5   5  10  151.28    7.10
  -5   5  10  144.09    7.10
  -5   5  10  156.88    6.80
   4  -5 -10   18.80    3.90
  -4   5  10   12.70    2.60
  -4   5  10   14.10    2.60
  -4   5  10   15.30    2.80
  -4   5  10   14.00    3.70
  -4   5  10   11.00    2.10
  -4   5  10   10.80    2.80
  -4   5  10   12.70    2.90
  -4   5  10   17.30    2.20
  -4   5  10   13.20    2.30
   3  -5 -10    4.10    2.70
   3  -5 -10    8.60    5.60
   3  -5 -10    4.80    2.70
  -3   5  10    8.80    3.70
  -3   5  10    4.90    1.70
  -3   5  10    5.60    3.00
  -3   5  10    5.30    2.00
   2  -5 -10   61.69    5.40
   2  -5 -10   66.99    6.00
  -2   5  10   61.89    4.40
  -2   5  10   74.89    5.80
  -2   5  10   65.79    4.00
  -2   5  10   70.69    6.50
   1  -5 -10  603.84   22.80
   1  -5 -10  565.44   22.60
  -1   5  10  599.34   23.20
  -1   5  10  609.84   20.60
   0  -5 -10   59.09    5.30
   0   5  10   55.29    6.30
   1   5  10   72.19    6.00
   1   5  10   73.69    6.00
   2   5  10  262.97    9.90
   2   5  10  251.67   12.30
   2   5  10  247.88   12.10
  -3  -5 -10   94.69    5.10
  -3  -5 -10  101.29    5.40
  -3  -5 -10   95.39    5.30
  -3  -5 -10   96.69    5.30
   3   5  10  105.79    5.40
   3   5  10   89.79    5.20
  -4  -5 -10    9.20    2.10
  -4  -5 -10   13.60    2.40
  -4  -5 -10   12.30    2.00
  -4  -5 -10    7.20    2.00
   4   5  10    9.80    2.00
   4   5  10   14.70    2.30
  -5  -5 -10   30.80    2.80
  -5  -5 -10   29.90    2.90
  -5  -5 -10   25.50    2.50
  -5  -5 -10   26.30    3.80
  -5  -5 -10   26.40    2.70
   5   5  10   25.30    2.40
  -6  -5 -10   11.20    1.50
  -6  -5 -10   10.00    1.50
  -6  -5 -10    9.80    1.30
  -6  -5 -10   11.40    1.50
   6   5  10   11.90    1.60
  -7   5   9    3.30    1.10
  -7   5   9    5.60    1.30
  -7   5   9    3.80    1.10
  -6   5   9   39.40    3.30
  -6   5   9   38.30    3.30
  -6   5   9   38.50    3.20
  -6   5   9   42.70    3.00
  -6   5   9   35.20    3.40
   5  -5  -9   85.99    6.90
  -5   5   9   90.49    5.50
  -5   5   9   89.39    5.50
  -5   5   9   95.19    5.40
  -5   5   9  108.79    7.50
  -5   5   9   87.69    4.70
  -5   5   9   94.69    5.10
  -5   5   9   95.39    4.90
  -5   5   9   95.49    5.70
   4  -5  -9   45.60    5.50
   4  -5  -9   32.90    6.50
  -4   5   9   62.99    5.90
  -4   5   9   44.50    4.60
  -4   5   9   40.00    4.20
  -4   5   9   41.80    4.20
  -4   5   9   35.40    3.30
  -4   5   9   38.90    3.30
  -4   5   9   44.60    4.10
  -4   5   9   43.80    4.10
  -4   5   9   43.20    3.60
   3  -5  -9   37.20    4.80
   3  -5  -9   36.10    4.90
  -3   5   9   34.50    5.20
  -3   5   9   33.10    3.10
  -3   5   9   33.30    4.70
  -3   5   9   45.00    3.80
  -3   5   9   40.20    5.40
   2  -5  -9    3.90    2.00
   2  -5  -9    3.20    2.10
  -2   5   9    3.10    2.60
  -2   5   9    6.30    2.60
  -2   5   9    6.40    1.80
   1  -5  -9   10.70    2.70
   1  -5  -9   10.70    2.60
  -1   5   9    9.80    2.70
  -1   5   9   16.50    4.90
  -1   5   9   11.70    2.00
   0  -5  -9  181.18    8.90
   0   5   9  171.58    8.70
   0   5   9  174.78    9.00
   1   5   9  132.59    7.60
   1   5   9  127.59    7.30
  -2  -5  -9   75.19    4.30
   2   5   9   77.19    5.90
   2   5   9   93.09    4.60
   2   5   9   75.59    6.00
  -3  -5  -9   52.89    3.80
  -3  -5  -9   52.69    3.80
   3   5   9   48.80    5.60
   3   5   9   47.60    3.70
   3   5   9   56.39    6.40
  -4  -5  -9    1.50    1.70
  -4  -5  -9    4.10    1.70
  -4  -5  -9    1.00    1.50
  -4  -5  -9    2.40    1.70
  -4  -5  -9    2.40    1.50
  -4  -5  -9    1.70    1.60
  -4  -5  -9    1.60    1.80
   4   5   9   -0.50    1.50
   4   5   9   -0.30    1.70
  -5  -5  -9    2.30    1.60
  -5  -5  -9    3.30    1.70
  -5  -5  -9    0.40    1.50
  -5  -5  -9    1.30    1.50
  -5  -5  -9    2.20    1.70
  -5  -5  -9    1.00    1.50
  -5  -5  -9    3.70    1.80
  -5  -5  -9    1.50    1.40
   5   5   9    1.00    1.50
   5   5   9   -2.00    1.30
  -6  -5  -9    5.50    1.50
  -6  -5  -9    4.30    1.50
  -6  -5  -9    5.60    1.40
  -6  -5  -9    5.70    1.50
  -6  -5  -9    7.00    1.60
  -6  -5  -9    5.40    1.50
   6   5   9    4.70    1.50
  -7   5   8    2.90    1.10
  -7   5   8    2.00    1.20
  -7   5   8    1.90    1.30
  -6   5   8    4.90    1.60
  -6   5   8    7.90    2.10
  -6   5   8    7.00    1.90
  -6   5   8    7.00    1.80
  -6   5   8    5.00    1.70
   5  -5  -8  107.79    7.90
  -5   5   8  118.99    6.50
  -5   5   8  118.29    6.40
  -5   5   8  117.29    5.60
  -5   5   8  129.69    8.30
  -5   5   8  116.79    5.70
  -5   5   8  120.49    6.30
  -5   5   8  110.89    6.40
  -5   5   8  127.59    6.00
   4  -5  -8  320.27   14.50
   4  -5  -8  315.97   15.60
   4  -5  -8  355.26   15.20
  -4   5   8  349.77   12.60
  -4   5   8  307.17   15.30
  -4   5   8  353.66   15.20
  -4   5   8  365.36   13.40
  -4   5   8  338.77   15.90
   3  -5  -8   16.90    3.10
   3  -5  -8   13.60    3.20
  -3   5   8   14.80    3.60
  -3   5   8   10.20    3.00
  -3   5   8   14.20    2.30
  -3   5   8    7.00    2.50
  -3   5   8   15.60    2.10
   2  -5  -8   16.30    2.90
   2  -5  -8   18.80    3.10
  -2   5   8   20.70    2.40
  -2   5   8   30.60    3.90
  -2   5   8   18.40    3.30
  -2   5   8   13.10    2.80
  -2   5   8   19.10    3.80
   1  -5  -8   11.50    2.60
   1  -5  -8    4.00    1.70
  -1   5   8    8.10    2.40
  -1   5   8    6.00    1.60
  -1   5   8    8.90    2.20
  -1   5   8    4.40    2.40
   0  -5  -8   73.89    5.20
   0   5   8   85.49    5.50
   0   5   8   87.59    5.40
  -1  -5  -8   24.30    3.40
   1   5   8   31.20    3.80
   1   5   8   29.50    3.60
  -2  -5  -8  125.79    5.60
  -2  -5  -8  127.59    5.60
   2   5   8  124.69    7.20
   2   5   8  122.89    7.40
   2   5   8  131.09    5.60
  -3  -5  -8   17.30    2.30
  -3  -5  -8   17.30    2.40
   3   5   8   22.00    4.20
   3   5   8   21.10    3.90
   3   5   8   20.20    2.50
  -4  -5  -8    7.50    1.90
  -4  -5  -8    7.40    2.10
  -4  -5  -8    7.20    2.10
  -4  -5  -8    6.70    1.90
  -4  -5  -8    7.50    1.80
  -4  -5  -8   10.00    2.10
  -4  -5  -8    3.20    1.80
  -4  -5  -8    4.60    2.00
   4   5   8    5.40    1.90
  -5  -5  -8   24.00    2.90
  -5  -5  -8   30.20    3.20
  -5  -5  -8   26.00    2.60
  -5  -5  -8   22.60    2.80
  -5  -5  -8   28.80    3.10
  -5  -5  -8   25.70    2.90
  -5  -5  -8   23.20    3.00
  -5  -5  -8   19.60    2.80
  -5  -5  -8   22.00    2.70
   5   5   8   27.50    2.70
   5   5   8   22.30    2.60
  -6  -5  -8    4.80    1.70
  -6  -5  -8    4.00    1.50
  -6  -5  -8    6.30    1.90
  -6  -5  -8    6.70    1.70
  -6  -5  -8    6.60    1.70
  -6  -5  -8    6.90    1.80
  -7   5   7   30.80    2.80
  -7   5   7   26.40    2.50
  -7   5   7   33.20    2.50
  -6   5   7   50.89    3.60
  -6   5   7   59.29    4.20
  -6   5   7   58.89    4.40
  -6   5   7   54.29    3.60
  -6   5   7   53.89    3.70
  -5   5   7  122.49    5.70
  -5   5   7  110.89    8.00
  -5   5   7  125.09    6.40
  -5   5   7  118.59    6.40
  -5   5   7  127.69    6.00
  -5   5   7  122.59    6.60
  -5   5   7  115.49    5.60
  -5   5   7  108.79    6.30
   4  -5  -7    5.80    2.90
  -4   5   7    0.60    1.40
  -4   5   7   -0.20    2.20
  -4   5   7   -0.60    2.20
  -4   5   7    1.20    2.50
  -4   5   7    0.70    1.60
   3  -5  -7  158.68    8.40
  -3   5   7  167.28    9.00
  -3   5   7  158.18    8.80
  -3   5   7  170.98    7.40
  -3   5   7  171.28    9.30
  -3   5   7  172.58    8.70
   2  -5  -7  144.09    7.60
   2  -5  -7  157.48    7.80
  -2   5   7  151.48    7.90
  -2   5   7  152.68    7.60
  -2   5   7  164.28    8.10
  -2   5   7  160.08    6.60
  -2   5   7  156.38    8.30
   1  -5  -7  455.25   16.90
   1  -5  -7  448.86   17.30
  -1   5   7  478.35   17.70
  -1   5   7  493.25   17.60
  -1   5   7  483.25   17.00
   0  -5  -7  191.98    8.70
   0   5   7  205.38    8.80
   0   5   7  192.48    8.60
  -1  -5  -7   44.90    3.80
   1   5   7   59.29    4.10
   1   5   7   44.70    3.90
  -2  -5  -7  126.19    5.50
  -2  -5  -7  132.39    7.20
  -2  -5  -7  132.59    5.60
   2   5   7  129.99    5.60
   2   5   7  145.39    7.50
   2   5   7  138.29    7.40
   2   5   7  143.09    7.20
  -3  -5  -7  416.06   17.10
  -3  -5  -7  426.76   15.00
  -3  -5  -7  432.66   15.10
   3   5   7  403.76   16.70
   3   5   7  431.66   17.60
   3   5   7  445.26   15.00
   3   5   7  428.86   17.10
  -4  -5  -7  132.19    8.60
  -4  -5  -7  154.68    7.00
  -4  -5  -7  150.48    6.80
   4   5   7  138.09    8.40
   4   5   7  151.58    6.70
   4   5   7  140.69    9.30
   4   5   7  143.89    8.80
  -5  -5  -7  100.19    5.30
  -5  -5  -7  106.69    5.70
  -5  -5  -7  106.29    5.30
  -5  -5  -7  100.29    5.60
  -5  -5  -7  100.89    5.80
  -5  -5  -7  108.29    5.70
  -5  -5  -7  106.09    5.60
  -5  -5  -7  102.09    5.60
  -5  -5  -7   98.69    5.50
   5   5   7  100.99    5.40
  -6  -5  -7    2.00    1.50
  -6  -5  -7   -1.20    1.30
  -6  -5  -7    1.90    1.60
  -6  -5  -7   -1.20    1.40
  -6  -5  -7    0.10    1.50
  -6  -5  -7   -0.80    1.30
  -6  -5  -7    1.90    1.70
  -7  -5  -7   18.50    1.90
  -7  -5  -7   21.40    2.20
  -7  -5  -7   19.00    1.90
  -7  -5  -7   28.30    2.30
  -7   5   6    3.60    1.30
  -7   5   6    5.10    1.40
  -7   5   6    2.50    1.50
  -7   5   6    3.80    1.40
  -6   5   6  111.69    6.10
  -6   5   6   98.49    5.40
  -6   5   6  110.69    5.80
  -6   5   6  107.59    5.30
  -6   5   6  107.29    5.20
   5  -5  -6   69.39    7.20
  -5   5   6   79.99    4.50
  -5   5   6   62.99    5.90
  -5   5   6   66.49    7.20
  -5   5   6   76.69    6.90
  -5   5   6   82.79    7.00
  -5   5   6   64.99    6.50
   4  -5  -6   63.09    6.00
  -4   5   6   56.29    4.00
  -4   5   6   58.59    3.80
  -4   5   6   52.89    5.60
  -4   5   6   56.69    5.70
  -4   5   6   57.79    5.70
  -4   5   6   68.99    5.90
   3  -5  -6   50.79    4.30
  -3   5   6   55.99    4.70
  -3   5   6   49.50    4.90
  -3   5   6   53.69    5.00
  -3   5   6   58.49    5.00
  -3   5   6   53.69    3.60
   2  -5  -6   39.90    3.50
  -2   5   6   36.70    4.10
  -2   5   6   41.40    3.90
  -2   5   6   33.90    3.40
  -2   5   6   37.10    4.00
   1  -5  -6 1726.83   56.59
   1  -5  -6 1767.62   57.09
  -1   5   6 1794.92   57.19
  -1   5   6 1698.63   57.19
  -1   5   6 1741.83   56.59
  -1   5   6 1871.11   56.89
   0  -5  -6   43.70    3.40
   0   5   6   44.60    3.40
   0   5   6   44.70    3.50
  -1  -5  -6 1776.62   53.89
  -1  -5  -6 1681.93   53.99
   1   5   6 1647.74   53.89
   1   5   6 1578.04   53.89
   1   5   6 1661.93   53.99
  -2  -5  -6   67.29    3.50
  -2  -5  -6   63.39    4.70
  -2  -5  -6   72.69    4.80
   2   5   6   70.99    5.00
   2   5   6   70.69    4.80
   2   5   6   69.19    4.50
   2   5   6   67.49    3.50
  -3  -5  -6   66.59    3.80
  -3  -5  -6   70.79    5.50
  -3  -5  -6   76.49    4.00
   3   5   6   83.79    5.70
   3   5   6   65.29    4.90
   3   5   6   70.69    3.90
   3   5   6   82.59    5.90
  -4  -5  -6   35.20    3.40
  -4  -5  -6   36.00    3.20
  -4  -5  -6   33.00    5.00
   4   5   6   37.80    5.30
   4   5   6   32.80    4.30
   4   5   6   38.00    5.00
   4   5   6   37.90    3.20
  -5  -5  -6   63.99    5.30
  -5  -5  -6   75.99    4.70
  -5  -5  -6   71.59    4.60
  -5  -5  -6   70.89    4.80
  -5  -5  -6   67.09    4.60
  -5  -5  -6   65.59    4.40
  -5  -5  -6   69.09    4.90
  -5  -5  -6   72.99    5.00
  -5  -5  -6   71.49    4.80
   5   5   6   72.49    4.40
  -6  -5  -6   77.09    4.80
  -6  -5  -6   79.79    4.80
  -6  -5  -6   82.69    4.70
  -6  -5  -6   75.49    4.40
  -6  -5  -6   79.59    4.80
  -6  -5  -6   80.89    4.70
  -6  -5  -6   77.89    4.90
  -6  -5  -6   74.39    4.60
   6   5   6   79.19    4.30
  -7  -5  -6   39.20    2.90
  -7  -5  -6   46.40    3.00
  -7  -5  -6   39.70    3.10
  -7  -5  -6   38.50    2.80
  -7  -5  -6   39.70    3.00
  -7   5   5   12.10    1.80
  -7   5   5   13.30    1.90
  -7   5   5   12.70    2.00
  -7   5   5   10.80    1.70
  -6   5   5   51.39    3.60
  -6   5   5   51.59    6.10
  -6   5   5   51.09    3.80
  -6   5   5   50.99    3.70
  -6   5   5   53.09    4.50
   5  -5  -5   22.80    4.40
  -5   5   5   24.10    2.70
  -5   5   5   20.60    4.20
  -5   5   5   23.20    4.50
  -5   5   5   21.50    4.30
  -5   5   5   16.20    4.10
   4  -5  -5  277.77   13.30
  -4   5   5  298.97   12.90
  -4   5   5  297.97   13.30
  -4   5   5  300.57   13.10
  -4   5   5  285.67   13.20
  -4   5   5  271.27   10.90
   3  -5  -5  368.76   15.40
   3  -5  -5  381.06   14.60
  -3   5   5  392.36   15.20
  -3   5   5  374.96   13.60
  -3   5   5  405.46   15.60
  -3   5   5  384.96   15.30
  -3   5   5  377.86   15.00
   2  -5  -5    3.60    1.50
  -2   5   5    4.50    1.80
  -2   5   5    9.60    2.10
  -2   5   5    8.70    2.00
  -2   5   5    5.00    1.90
   1  -5  -5  422.76   15.40
  -1   5   5  438.46   15.50
  -1   5   5  415.16   15.50
  -1   5   5  443.86   15.30
   0  -5  -5  362.56   13.00
   0   5   5  358.76   12.90
   0   5   5  329.97   12.70
   0   5   5  371.86   13.00
  -1  -5  -5    3.70    1.40
  -1  -5  -5    2.60    1.30
   1   5   5    1.80    1.30
   1   5   5    1.80    1.50
   1   5   5    0.60    1.10
   1   5   5    1.80    1.60
  -2  -5  -5    1.60    1.50
   2   5   5   -0.20    1.40
   2   5   5   -0.30    1.10
   2   5   5    0.20    1.30
  -3  -5  -5   30.00    2.60
  -3  -5  -5   35.70    2.60
  -3  -5  -5   32.50    3.90
   3   5   5   31.70    3.70
   3   5   5   35.60    3.40
   3   5   5   29.00    4.00
  -4  -5  -5    3.60    2.50
  -4  -5  -5    6.70    1.80
  -4  -5  -5    1.80    1.30
   4   5   5    3.90    2.70
   4   5   5    5.70    2.70
   4   5   5    3.20    3.20
  -5  -5  -5  170.18    8.00
  -5  -5  -5  170.18    7.80
  -5  -5  -5  167.18    7.60
  -5  -5  -5  164.28    7.50
  -5  -5  -5  174.38    7.80
  -5  -5  -5  152.68    7.40
  -5  -5  -5  163.08    7.60
  -5  -5  -5  168.58    7.30
   5   5   5  164.58    7.20
  -6  -5  -5  133.29    6.30
  -6  -5  -5  129.19    6.10
  -6  -5  -5  110.69    5.90
  -6  -5  -5  121.99    6.30
  -6  -5  -5  113.59    6.00
  -6  -5  -5  110.39    5.60
  -6  -5  -5  132.59    6.20
  -6  -5  -5  127.29    6.10
   6   5   5  114.79    5.60
  -7  -5  -5    5.30    1.60
  -7  -5  -5    9.40    1.70
  -7  -5  -5    9.50    1.90
  -7  -5  -5    7.20    1.70
  -7   5   4   47.50    3.30
  -7   5   4   50.79    3.10
  -7   5   4   45.90    3.30
  -6   5   4   56.79    3.90
  -6   5   4   54.09    3.90
  -6   5   4   60.39    4.10
  -6   5   4   55.39    6.30
  -6   5   4   57.69    3.80
  -6   5   4   54.09    4.60
   5  -5  -4   49.00    6.20
  -5   5   4   49.40    5.70
  -5   5   4   53.49    3.90
  -5   5   4   54.39    6.20
  -5   5   4   51.89    6.30
  -5   5   4   56.99    6.40
   4  -5  -4   82.99    4.60
   4  -5  -4   96.99    6.70
  -4   5   4   88.29    6.20
  -4   5   4   91.49    6.40
  -4   5   4   97.89    6.50
  -4   5   4   88.29    5.90
  -4   5   4  101.69    6.50
   3  -5  -4    7.00    2.20
   3  -5  -4    6.10    1.70
  -3   5   4    6.70    2.10
  -3   5   4    6.30    2.10
  -3   5   4    4.70    1.90
  -3   5   4    8.50    2.30
   2  -5  -4  427.86   15.20
  -2   5   4  430.66   15.50
  -2   5   4  439.96   15.40
  -2   5   4  429.66   15.70
  -2   5   4  386.26   15.90
  -2   5   4  436.26   15.60
   1  -5  -4 1102.89   35.70
  -1   5   4 1123.99   35.80
  -1   5   4 1031.50   35.50
  -1   5   4 1133.89   35.60
  -1   5   4 1089.99   35.70
   0  -5  -4  437.26   17.00
   0  -5  -4  407.56   16.90
   0  -5  -4  417.76   14.70
   0   5   4  373.96   14.90
   0   5   4  428.06   17.20
   0   5   4  437.06   14.70
   0   5   4  431.66   14.70
   0   5   4  430.66   14.60
   0   5   4  437.36   17.00
   0   5   4  416.26   14.90
  -1  -5  -4    4.70    1.30
  -1  -5  -4    3.50    1.40
   1   5   4    6.70    2.10
   1   5   4    4.20    1.40
   1   5   4    4.10    1.40
   1   5   4    1.10    1.20
  -2  -5  -4  689.33   23.10
  -2  -5  -4  607.64   22.50
   2   5   4  678.33   22.50
   2   5   4  696.53   22.90
   2   5   4  656.73   23.30
  -3  -5  -4   46.40    4.10
  -3  -5  -4   44.60    2.90
  -3  -5  -4   43.90    3.90
  -3  -5  -4   49.60    2.90
   3   5   4   48.10    4.50
   3   5   4   48.70    3.70
   3   5   4   53.29    4.10
  -4  -5  -4   56.29    3.80
  -4  -5  -4   64.79    5.20
  -4  -5  -4   60.09    3.70
  -4  -5  -4   58.39    5.20
   4   5   4   52.09    5.50
   4   5   4   55.89    4.80
  -5  -5  -4    6.30    1.80
  -5  -5  -4    2.70    2.60
  -5  -5  -4    5.30    1.90
   5   5   4    2.30    2.50
   5   5   4    4.20    1.60
   5   5   4    5.40    2.90
  -6  -5  -4   -0.50    1.60
  -6  -5  -4    0.90    1.80
  -6  -5  -4    1.30    1.60
  -6  -5  -4   -0.60    1.60
  -6  -5  -4    0.90    1.80
  -6  -5  -4    2.00    1.70
  -6  -5  -4   -1.20    1.40
   6   5   4    1.70    1.50
  -7  -5  -4    4.10    1.60
  -7  -5  -4    4.20    1.60
  -7  -5  -4    4.20    1.70
  -7  -5  -4    3.60    1.60
  -8   5   3   33.40    2.10
  -7   5   3    1.40    1.50
  -7   5   3    0.60    1.30
  -7   5   3   -1.70    1.30
  -7   5   3    2.00    1.30
  -6   5   3  112.49    5.60
  -6   5   3  116.59    5.60
  -6   5   3  103.09    5.60
  -6   5   3  120.49    8.40
  -6   5   3  116.49    5.90
  -6   5   3  119.49    6.40
   5  -5  -3  115.29    5.40
   5  -5  -3  123.39    8.10
  -5   5   3  113.29    7.70
  -5   5   3   98.39    7.50
  -5   5   3  116.29    5.50
  -5   5   3  109.39    7.80
  -5   5   3  108.59    7.80
  -5   5   3  120.09    5.80
   4  -5  -3  168.68    9.00
  -4   5   3  190.48    9.10
  -4   5   3  166.88    8.70
  -4   5   3  184.98    9.00
  -4   5   3  158.38    6.70
  -4   5   3  163.18    8.70
   3  -5  -3    2.00    1.70
  -3   5   3   -0.30    1.30
  -3   5   3    1.50    1.50
  -3   5   3    2.00    1.60
  -3   5   3    3.00    1.60
  -3   5   3    2.10    1.60
   2  -5  -3  203.78    8.50
   2  -5  -3  202.18    7.80
  -2   5   3  201.08    8.40
  -2   5   3  203.08    8.40
  -2   5   3  194.38    8.20
  -2   5   3  201.18    8.30
   1  -5  -3    3.90    1.90
   1  -5  -3    3.70    1.30
   1  -5  -3    2.60    1.10
   1  -5  -3    3.20    1.80
   1  -5  -3    2.40    1.00
  -1   5   3    4.40    1.50
  -1   5   3    4.70    1.40
  -1   5   3    2.80    1.20
  -1   5   3    5.60    2.10
  -1   5   3    1.80    1.10
  -1   5   3    3.70    1.10
  -1   5   3    4.50    1.80
   0  -5  -3  240.38   10.50
   0  -5  -3  242.38    8.80
   0  -5  -3  238.98    9.30
   0  -5  -3  229.68   10.70
   0   5   3  249.28   10.50
   0   5   3  217.08    8.40
   0   5   3  257.07    8.80
   0   5   3  214.28    8.70
   0   5   3  257.47   10.90
   0   5   3  214.98    9.00
   0   5   3  243.28    9.20
  -1  -5  -3 1065.49   33.70
  -1  -5  -3 1047.40   33.50
  -1  -5  -3  950.20   35.30
   1   5   3 1046.40   35.00
   1   5   3 1055.89   33.20
   1   5   3 1048.20   33.50
   1   5   3 1015.80   33.70
   1   5   3 1037.80   35.50
  -2  -5  -3   13.20    2.10
  -2  -5  -3   17.30    2.20
   2   5   3   12.00    2.20
   2   5   3   19.10    2.20
   2   5   3   21.50    2.40
  -3  -5  -3 1234.48   43.20
  -3  -5  -3 1264.07   42.60
   3   5   3 1278.17   43.60
   3   5   3 1350.76   42.90
   3   5   3 1361.56   42.30
  -4  -5  -3  203.28    9.20
  -4  -5  -3  191.28    9.70
  -4  -5  -3  188.58    7.60
  -4  -5  -3  185.38    7.70
   4   5   3  191.58   10.10
   4   5   3  185.78    9.10
  -5  -5  -3  125.89    8.50
  -5  -5  -3  142.69    6.40
  -5  -5  -3  136.59    8.20
  -5  -5  -3  139.49    6.50
   5   5   3  133.69    8.00
   5   5   3  126.59    8.80
  -6  -5  -3    2.40    1.60
  -6  -5  -3    4.80    2.00
  -6  -5  -3    1.90    1.90
  -6  -5  -3    1.90    1.60
  -6  -5  -3    3.30    1.70
  -6  -5  -3    0.90    1.60
  -7  -5  -3    0.60    1.50
  -7  -5  -3    2.20    1.60
  -7  -5  -3    0.00    1.40
  -7  -5  -3    0.10    1.40
  -8   5   2    5.00    1.80
  -8   5   2    4.80    1.20
  -7   5   2    4.10    1.60
  -7   5   2    1.70    1.40
  -7   5   2    3.60    1.60
  -7   5   2    2.90    1.40
   6  -5  -2   -4.00    1.40
  -6   5   2    1.70    1.70
  -6   5   2    0.80    1.50
  -6   5   2    2.00    1.70
  -6   5   2    0.40    1.50
  -6   5   2   -3.10    2.50
  -6   5   2   -1.00    1.50
   5  -5  -2  236.78   12.10
  -5   5   2  253.67    9.60
  -5   5   2  244.98   12.20
  -5   5   2  263.77   12.20
  -5   5   2  235.58   11.90
  -5   5   2  256.07   10.00
   4  -5  -2    5.30    2.20
  -4   5   2   10.90    2.70
  -4   5   2    5.30    2.20
  -4   5   2    8.20    1.60
  -4   5   2    6.30    2.40
  -4   5   2    6.10    2.40
   3  -5  -2   95.99    5.50
  -3   5   2   85.19    5.30
  -3   5   2   91.09    5.30
  -3   5   2   81.39    5.10
  -3   5   2   85.69    5.20
  -3   5   2   77.79    5.00
   2  -5  -2 2084.99   67.79
   2  -5  -2 2182.18   66.99
  -2   5   2 2117.59   67.59
  -2   5   2 2094.69   67.69
  -2   5   2 2186.88   67.69
  -2   5   2 2079.69   67.59
   1  -5  -2 3498.15  107.49
   1  -5  -2 3272.17  107.49
   1  -5  -2 3603.64  109.09
   1  -5  -2 3438.86  107.19
   1  -5  -2 3449.25  109.19
  -1   5   2 3534.85  109.49
  -1   5   2 3280.07  107.29
  -1   5   2 3385.36  107.39
  -1   5   2 3055.49  107.39
  -1   5   2 3618.84  107.39
  -1   5   2 3638.24  107.69
   0  -5  -2 1549.14   50.39
   0  -5  -2 1618.74   49.70
   0  -5  -2 1514.65   51.29
   0  -5  -2 1571.94   51.49
   0   5   2 1607.14   50.29
   0   5   2 1598.74   51.49
   0   5   2 1594.04   51.39
   0   5   2 1484.45   49.80
  -1  -5  -2    8.70    1.50
  -1  -5  -2    8.90    2.10
  -1  -5  -2    5.70    1.30
   1   5   2    8.20    1.50
   1   5   2   11.40    1.50
   1   5   2    3.70    1.60
   1   5   2    7.70    1.90
   1   5   2    9.30    2.00
  -2  -5  -2  320.67   11.60
  -2  -5  -2  301.77   11.60
  -2  -5  -2  314.17   12.00
   2   5   2  336.67   11.20
   2   5   2  324.27   11.70
   2   5   2  329.17   12.30
  -3  -5  -2   26.40    3.40
  -3  -5  -2   30.20    2.80
   3   5   2   21.80    2.70
  -4  -5  -2    1.20    1.80
  -4  -5  -2    3.40    1.30
  -4  -5  -2    1.50    1.30
  -4  -5  -2    2.20    1.90
   4   5   2    3.50    2.00
  -5  -5  -2   88.99    4.80
  -5  -5  -2   88.29    4.80
  -5  -5  -2   90.29    6.90
   5   5   2   82.09    7.10
   5   5   2   93.99    6.50
  -6  -5  -2   62.49    4.20
  -6  -5  -2   56.69    4.50
  -6  -5  -2   56.59    4.40
  -6  -5  -2   69.99    4.30
  -6  -5  -2   59.59    4.40
  -7  -5  -2   24.50    2.70
  -7  -5  -2   20.80    2.70
  -7  -5  -2   14.30    3.10
  -8   5   1  101.89    4.20
  -8   5   1   99.09    4.20
   7  -5  -1   97.09    4.90
  -7   5   1   89.89    4.90
  -7   5   1  100.99    4.90
  -7   5   1   83.89    4.80
  -7   5   1   95.99    5.10
  -7   5   1   99.09    4.90
  -7   5   1   96.09    4.70
  -6   5   1   30.60    5.30
  -6   5   1   34.40    3.30
  -6   5   1   34.80    3.40
  -6   5   1   33.90    3.40
  -6   5   1   36.40    3.50
  -6   5   1   37.80    3.40
   5  -5  -1   21.40    3.90
  -5   5   1   30.10    3.20
  -5   5   1   28.80    4.60
  -5   5   1   20.20    4.10
  -5   5   1   31.60    5.00
  -5   5   1   21.30    3.90
  -5   5   1   26.30    2.70
   4  -5  -1   75.69    5.50
  -4   5   1   75.29    5.80
  -4   5   1   74.79    5.50
  -4   5   1   79.09    4.00
  -4   5   1   74.99    5.60
  -4   5   1   74.79    5.40
   3  -5  -1    3.50    1.70
  -3   5   1    3.90    1.80
  -3   5   1    4.30    1.80
  -3   5   1    6.40    2.00
  -3   5   1    5.60    1.90
  -3   5   1   13.80    2.70
   2  -5  -1  136.09    6.00
  -2   5   1  128.59    6.40
  -2   5   1  126.49    5.80
  -2   5   1  130.09    6.10
  -2   5   1  119.89    5.70
  -2   5   1  134.29    5.90
   1  -5  -1 1262.77   40.10
   1  -5  -1 1314.47   41.30
   1  -5  -1 1281.17   41.30
   1  -5  -1 1226.08   39.70
  -1   5   1 1253.07   41.40
  -1   5   1 1285.27   40.30
  -1   5   1 1178.88   39.60
  -1   5   1 1145.09   39.70
  -1   5   1 1274.27   41.40
  -1   5   1 1184.38   39.50
   0  -5  -1 1696.23   56.79
   0  -5  -1 1730.43   55.99
   0  -5  -1 1775.12   56.89
   0   5   1 1789.72   56.89
   0   5   1 1778.92   55.99
  -1  -5  -1  166.78    7.30
  -1  -5  -1  142.99    6.20
  -1  -5  -1  147.99    6.20
  -1  -5  -1  169.38    7.30
   1   5   1  166.78    6.40
   1   5   1  161.38    7.20
   1   5   1  167.18    7.40
   1   5   1  152.48    6.90
  -2  -5  -1 1625.04   51.69
  -2  -5  -1 1578.64   52.19
  -2  -5  -1 1608.64   51.99
   2   5   1 1677.83   51.79
   2   5   1 1680.83   52.49
   2   5   1 1598.44   53.99
  -3  -5  -1 1839.82   58.49
  -3  -5  -1 1809.12   57.69
  -3  -5  -1 1705.73   57.69
   3   5   1 1858.71   57.89
  -4  -5  -1    3.30    1.90
  -4  -5  -1    0.10    1.10
  -4  -5  -1    0.20    1.00
  -4  -5  -1    3.00    2.00
   4   5   1    1.20    1.70
  -5  -5  -1   34.80    4.50
  -5  -5  -1   34.70    3.00
  -5  -5  -1   35.50    3.10
  -5  -5  -1   35.00    5.30
   5   5   1   25.60    4.30
   5   5   1   25.90    3.90
  -6  -5  -1   38.10    3.50
  -6  -5  -1   41.60    4.10
  -6  -5  -1   50.59    4.10
  -6  -5  -1   38.10    4.80
  -8   5   0    5.80    1.30
  -8   5   0    5.60    1.20
   7  -5   0   55.79    3.80
  -7   5   0   52.09    3.80
  -7   5   0   56.79    3.90
  -7   5   0   54.59    3.60
  -7   5   0   65.79    3.90
  -7   5   0   53.99    4.00
  -7   5   0   61.29    3.90
  -6   5   0  312.17   12.20
  -6   5   0  330.47   12.40
  -6   5   0  313.77   12.00
  -6   5   0  301.47   11.90
  -6   5   0  320.37   12.20
  -6   5   0  319.07   15.10
  -6   5   0  335.47   12.20
   5  -5   0   10.50    3.20
  -5   5   0    9.40    3.30
  -5   5   0    9.80    2.00
  -5   5   0   13.30    2.40
  -5   5   0   17.10    3.80
  -5   5   0   12.40    3.30
  -5   5   0    7.60    3.20
   4  -5   0   17.30    2.90
  -4   5   0   13.90    2.90
  -4   5   0   17.70    3.30
  -4   5   0   19.40    3.60
  -4   5   0   15.10    2.00
  -4   5   0   17.50    3.20
   3  -5   0   39.60    3.50
  -3   5   0   36.40    4.10
  -3   5   0   32.20    3.50
  -3   5   0   35.00    3.50
  -3   5   0   33.70    3.40
   2  -5   0  243.58    9.30
  -2   5   0  228.78    9.40
  -2   5   0  240.48   10.30
  -2   5   0  227.78    9.00
  -2   5   0  234.98    9.00
   1  -5   0 1645.14   51.09
   1  -5   0 1641.74   51.09
   1  -5   0 1415.56   49.20
   1  -5   0 1582.94   50.09
  -1   5   0 1535.25   50.99
  -1   5   0 1359.66   49.30
  -1   5   0 1598.34   50.29
  -1   5   0 1653.33   51.19
   0  -5   0    1.90    1.40
   0  -5   0   -0.10    1.00
   0  -5   0   -0.50    1.30
   0   5   0    0.20    1.10
   0   5   0    0.40    1.40
   0   5   0    0.90    1.10
  -1  -5   0 1560.34   49.00
  -1  -5   0 1400.76   48.00
   1   5   0 1544.55   49.20
   1   5   0 1491.45   48.60
   1   5   0 1566.34   48.80
  -2  -5   0  202.28    8.00
  -2  -5   0  222.18    8.50
  -2  -5   0  226.88    8.60
   2   5   0  229.08    8.70
   2   5   0  220.28   10.00
   2   5   0  228.88    8.10
  -3  -5   0   30.40    2.80
  -3  -5   0   30.40    3.10
  -3  -5   0   32.50    2.80
   3   5   0   38.30    3.00
  -4  -5   0   15.70    2.60
  -4  -5   0   13.70    1.80
  -4  -5   0   14.10    1.80
  -4  -5   0   14.50    2.80
   4   5   0   17.10    2.80
  -5  -5   0    7.50    2.80
   5   5   0    9.30    2.80
  -8   5  -1   22.30    2.00
  -8   5  -1   19.20    1.80
  -8   5  -1   14.70    2.30
   7  -5   1    5.30    1.80
  -7   5  -1    6.30    1.80
  -7   5  -1    5.30    1.70
  -7   5  -1    4.20    1.50
  -7   5  -1    6.80    1.90
  -7   5  -1    5.10    1.70
  -7   5  -1    7.40    2.00
  -6   5  -1   49.40    4.10
  -6   5  -1   55.29    4.20
  -6   5  -1   43.40    3.80
  -6   5  -1   54.09    6.60
  -6   5  -1   49.90    4.10
  -6   5  -1   52.09    4.00
  -6   5  -1   51.39    3.90
  -6   5  -1   51.69    4.10
   5  -5   1   40.30    5.00
  -5   5  -1   43.90    5.70
  -5   5  -1   40.00    5.20
  -5   5  -1   33.90    3.30
  -5   5  -1   31.90    4.70
  -5   5  -1   32.20    5.20
  -5   5  -1   36.80    3.50
   4  -5   1    3.00    1.90
  -4   5  -1    0.70    1.60
  -4   5  -1    2.30    1.20
  -4   5  -1    1.50    1.90
  -4   5  -1    1.20    1.80
  -4   5  -1   -0.20    1.90
   3  -5   1 1914.71   61.49
  -3   5  -1 1871.11   62.19
  -3   5  -1 1978.20   61.69
  -3   5  -1 1920.21   61.59
  -3   5  -1 1861.01   61.79
   2  -5   1 1680.23   53.69
  -2   5  -1 1618.04   55.29
  -2   5  -1 1734.23   54.09
  -2   5  -1 1663.03   53.49
  -2   5  -1 1682.93   53.59
   1  -5   1  172.48    8.20
   1  -5   1  172.08    8.20
   1  -5   1  155.28    7.80
   1  -5   1  174.98    6.70
  -1   5  -1  164.28    6.70
  -1   5  -1  178.08    8.40
  -1   5  -1  182.18    7.90
  -1   5  -1  160.38    8.00
   0  -5   1 1787.42   58.39
   0  -5   1 1782.42   58.29
   0   5  -1 1787.62   58.29
   0   5  -1 1837.72   57.79
   0   5  -1 1812.32   58.39
  -1  -5   1 1210.18   39.40
  -1  -5   1 1108.19   40.50
  -1  -5   1 1286.87   40.50
  -1  -5   1 1255.67   40.50
   1   5  -1 1240.68   40.10
   1   5  -1 1264.87   40.10
   1   5  -1 1276.07   40.50
  -2  -5   1  122.19    5.20
  -2  -5   1  102.59    4.90
  -2  -5   1  119.19    5.30
   2   5  -1  124.29    6.50
   2   5  -1  127.59    5.30
  -3  -5   1    5.80    1.70
  -3  -5   1   11.70    2.20
   3   5  -1   14.80    2.40
  -4  -5   1   63.19    4.90
  -4  -5   1   74.49    3.70
   4   5  -1   74.09    5.30
  -8   5  -2   -0.60    1.00
  -8   5  -2    1.00    1.10
   7  -5   2   19.40    3.30
  -7   5  -2   18.80    2.50
  -7   5  -2   19.50    2.50
  -7   5  -2   23.40    2.50
  -7   5  -2   22.30    2.50
  -7   5  -2   19.00    3.50
  -7   5  -2   19.10    2.30
  -7   5  -2   22.80    2.50
  -6   5  -2   56.99    7.00
  -6   5  -2   62.09    4.40
  -6   5  -2   60.19    4.40
  -6   5  -2   59.19    4.30
  -6   5  -2   61.09    4.30
  -6   5  -2   61.39    4.50
  -6   5  -2   60.29    4.20
  -6   5  -2   58.89    4.10
   5  -5   2   90.99    6.70
  -5   5  -2   89.89    7.60
  -5   5  -2   85.39    7.20
  -5   5  -2   92.29    5.20
  -5   5  -2   84.59    4.90
  -5   5  -2   91.09    6.60
  -5   5  -2   90.69    6.80
   4  -5   2    2.80    1.90
  -4   5  -2    1.40    2.00
  -4   5  -2    1.40    1.70
  -4   5  -2   -1.00    1.20
  -4   5  -2    3.60    2.30
  -4   5  -2    1.30    1.60
   3  -5   2   25.30    3.30
   3  -5   2   27.90    3.20
  -3   5  -2   24.80    3.60
  -3   5  -2   31.20    3.70
  -3   5  -2   26.00    3.10
  -3   5  -2   24.60    3.20
   2  -5   2  346.77   12.50
  -2   5  -2  327.17   12.30
  -2   5  -2  361.46   13.00
  -2   5  -2  330.97   12.30
   1  -5   2    6.00    2.00
   1  -5   2    8.70    2.20
   1  -5   2   10.50    1.60
  -1   5  -2   12.60    1.90
  -1   5  -2    8.90    2.20
  -1   5  -2    5.90    1.90
  -1   5  -2    9.10    2.10
   0  -5   2 1607.54   51.89
   0  -5   2 1419.26   49.80
   0  -5   2 1656.23   51.89
   0  -5   2 1406.96   50.89
   0   5  -2 1680.13   51.79
   0   5  -2 1610.34   51.59
   0   5  -2 1657.43   51.19
  -1  -5   2 3552.34  108.79
  -1  -5   2 3436.36  109.99
  -1  -5   2 3655.33  110.19
  -1  -5   2 3113.79  108.69
   1   5  -2 3447.16  109.49
   1   5  -2 3672.33  110.09
   1   5  -2 3482.65  109.59
  -2  -5   2 1862.51   62.59
  -2  -5   2 1962.80   63.19
  -2  -5   2 2007.20   62.99
   2   5  -2 2016.80   64.49
   2   5  -2 2074.99   62.79
  -3  -5   2   74.69    4.70
  -3  -5   2   83.09    4.70
  -4  -5   2    4.00    2.00
  -7   5  -3    0.60    1.40
  -7   5  -3    0.80    1.40
  -7   5  -3    2.30    1.70
  -7   5  -3   -0.60    1.40
  -7   5  -3   -0.30    2.10
  -6   5  -3    4.30    1.80
  -6   5  -3    4.90    1.90
  -6   5  -3    3.40    1.70
  -6   5  -3    0.40    1.90
  -6   5  -3    2.10    3.60
  -6   5  -3    4.20    1.80
  -6   5  -3    1.60    1.90
  -6   5  -3    2.60    1.70
   5  -5   3  132.69    8.50
  -5   5  -3  150.58    6.70
  -5   5  -3  144.19    9.40
  -5   5  -3  149.88    9.70
  -5   5  -3  130.09    8.20
  -5   5  -3  143.89    8.50
  -5   5  -3  146.69    6.90
   4  -5   3  181.48    9.20
  -4   5  -3  194.18   10.20
  -4   5  -3  199.38   10.10
  -4   5  -3  193.98    9.30
  -4   5  -3  180.28    9.10
  -4   5  -3  188.78    7.60
   3  -5   3 1413.26   44.60
   3  -5   3 1313.07   44.70
  -3   5  -3 1319.27   44.70
  -3   5  -3 1373.36   45.60
  -3   5  -3 1362.76   44.80
  -3   5  -3 1372.16   45.30
   2  -5   3   18.20    2.40
   2  -5   3   16.80    2.30
  -2   5  -3   21.40    2.80
  -2   5  -3   22.20    2.60
  -2   5  -3   18.20    2.30
  -2   5  -3   25.40    3.20
   1  -5   3 1146.89   35.40
   1  -5   3 1045.70   37.60
   1  -5   3 1009.40   35.00
   1  -5   3 1107.49   38.00
  -1   5  -3 1143.39   35.60
  -1   5  -3 1118.09   37.30
  -1   5  -3 1123.69   35.00
  -1   5  -3 1084.89   38.00
  -1   5  -3 1057.09   37.70
   0  -5   3  250.77   11.20
   0  -5   3  252.77    9.30
   0  -5   3  257.17   11.10
   0   5  -3  249.97   10.90
   0   5  -3  268.27   11.20
   0   5  -3  246.38   10.30
  -1  -5   3    5.00    1.40
  -1  -5   3    3.70    1.20
   1   5  -3    3.60    1.50
   1   5  -3    3.50    1.50
   1   5  -3    2.50    1.40
  -2  -5   3  185.88    7.90
  -2  -5   3  199.88    8.00
   2   5  -3  192.38    8.70
  -3  -5   3    1.00    1.30
  -3  -5   3    1.30    1.50
  -4  -5   3  153.48    6.60
  -4  -5   3  164.18    7.90
  -7   5  -4    2.30    1.50
  -7   5  -4    6.30    1.90
  -7   5  -4    3.50    1.50
  -7   5  -4    5.50    1.60
  -6   5  -4    1.30    1.50
  -6   5  -4    2.00    1.70
  -6   5  -4    0.20    1.60
  -6   5  -4   -1.40    1.50
  -6   5  -4   -0.90    1.70
  -6   5  -4   -1.00    1.60
  -6   5  -4   -0.20    1.70
  -6   5  -4    2.20    1.70
   5  -5   4    4.80    3.10
   5  -5   4    4.20    2.90
  -5   5  -4    5.00    2.00
  -5   5  -4    3.20    3.30
  -5   5  -4    9.30    3.60
  -5   5  -4    5.30    1.80
  -5   5  -4    3.40    2.60
   4  -5   4   67.99    5.50
  -4   5  -4   54.69    4.90
  -4   5  -4   63.19    5.80
  -4   5  -4   62.09    5.20
  -4   5  -4   62.19    5.90
  -4   5  -4   51.99    3.60
   3  -5   4   48.30    4.10
  -3   5  -4   47.40    4.40
  -3   5  -4   47.00    3.90
  -3   5  -4   48.60    3.80
  -3   5  -4   57.39    4.70
   2  -5   4  715.13   23.90
   2  -5   4  726.23   23.90
  -2   5  -4  683.73   24.40
  -2   5  -4  675.33   23.70
  -2   5  -4  722.33   23.70
  -2   5  -4  695.53   24.40
   1  -5   4    3.10    2.00
   1  -5   4    3.80    1.30
   1  -5   4    1.60    1.10
  -1   5  -4    4.30    2.60
  -1   5  -4    5.40    1.50
   0  -5   4  442.96   15.50
   0  -5   4  448.16   15.10
   0  -5   4  445.36   17.90
   0   5  -4  447.26   16.80
   0   5  -4  443.36   17.50
  -1  -5   4 1081.89   35.20
  -1  -5   4 1061.99   34.90
   1   5  -4 1082.69   36.00
  -2  -5   4  401.76   14.70
  -2  -5   4  409.16   15.00
  -3  -5   4    5.10    2.00
  -3  -5   4    5.90    1.80
  -4  -5   4   82.19    4.50
  -4  -5   4  103.39    6.40
  -4  -5   4   90.29    5.80
   7  -5   5    5.00    2.50
  -7   5  -5    6.30    1.70
  -7   5  -5    5.80    1.60
  -7   5  -5    6.80    1.60
  -7   5  -5   10.10    1.70
  -6   5  -5  122.49    6.00
  -6   5  -5  120.49    6.10
  -6   5  -5  126.49    6.00
  -6   5  -5  121.89    6.30
  -6   5  -5  136.19    6.30
  -6   5  -5  127.79    6.10
  -6   5  -5  121.99    6.10
  -6   5  -5  119.49    6.00
  -5   5  -5  165.08   10.50
  -5   5  -5  157.68    7.60
  -5   5  -5  163.08    7.40
  -5   5  -5  164.88    7.60
  -5   5  -5  167.58    7.60
  -5   5  -5  166.28    7.30
  -5   5  -5  179.38    7.90
  -5   5  -5  159.18    7.40
  -5   5  -5  163.18    7.50
   4  -5   5    4.20    2.30
   4  -5   5    4.80    2.70
  -4   5  -5    5.30    1.80
  -4   5  -5    1.40    2.50
  -4   5  -5    7.50    2.70
  -4   5  -5    2.60    1.50
  -4   5  -5    1.70    2.70
   3  -5   5   38.90    3.80
   3  -5   5   33.80    2.60
  -3   5  -5   37.70    3.70
  -3   5  -5   32.00    4.20
  -3   5  -5   36.40    4.50
  -3   5  -5   35.10    2.80
   2  -5   5    3.20    1.60
   2  -5   5    2.30    1.50
  -2   5  -5    4.00    1.80
  -2   5  -5    2.00    1.70
  -2   5  -5    1.30    1.40
   1  -5   5    1.00    1.20
   1  -5   5    1.70    1.30
  -1   5  -5    2.70    1.50
   0  -5   5  378.86   13.40
   0  -5   5  378.46   12.80
   0  -5   5  344.97   12.80
   0   5  -5  353.66   14.60
  -1  -5   5  430.26   15.20
  -1  -5   5  418.16   14.80
   1   5  -5  399.86   15.70
  -2  -5   5    4.70    1.80
  -2  -5   5    5.70    1.60
  -2  -5   5    6.20    1.70
   2   5  -5    6.70    1.70
  -3  -5   5  367.56   14.40
  -3  -5   5  375.66   14.90
  -3  -5   5  383.76   13.20
   3   5  -5  356.06   14.40
  -4  -5   5  280.07   12.10
  -4  -5   5  270.77   10.40
  -4  -5   5  274.87   12.60
  -5  -5   5   25.80    3.00
   7  -5   6   45.90    2.80
  -7   5  -6   40.00    2.90
  -7   5  -6   41.90    2.70
  -7   5  -6   44.10    2.90
  -7   5  -6   45.10    3.00
  -7   5  -6   35.40    2.70
  -6   5  -6   75.19    4.70
  -6   5  -6   83.49    4.70
  -6   5  -6   78.49    4.50
  -6   5  -6   79.09    4.50
  -6   5  -6   77.79    4.50
  -6   5  -6   79.59    4.90
  -6   5  -6   86.69    4.80
  -6   5  -6   78.39    4.60
  -5   5  -6   69.79    4.60
  -5   5  -6   75.79    4.90
  -5   5  -6   65.59    4.60
  -5   5  -6   71.69    4.40
  -5   5  -6   69.89    7.80
  -5   5  -6   68.09    4.50
  -5   5  -6   64.79    4.40
  -5   5  -6   61.79    4.50
  -5   5  -6   67.29    4.70
   4  -5   6   42.80    4.90
   4  -5   6   46.60    5.20
  -4   5  -6   28.20    3.20
  -4   5  -6   30.00    4.30
  -4   5  -6   33.50    3.10
  -4   5  -6   32.80    5.00
  -4   5  -6   30.00    5.10
   3  -5   6   71.79    3.90
   3  -5   6   81.79    5.40
  -3   5  -6   73.49    5.80
  -3   5  -6   78.39    5.80
  -3   5  -6   73.99    6.10
   2  -5   6   67.49    4.80
   2  -5   6   70.69    4.50
   2  -5   6   65.49    3.40
  -2   5  -6   68.09    5.10
   1  -5   6 1613.84   53.89
   1  -5   6 1689.73   54.39
  -1   5  -6 1745.33   54.69
   0  -5   6   39.10    3.00
   0  -5   6   49.10    3.60
   0   5  -6   38.90    3.10
   0   5  -6   48.20    3.50
  -1  -5   6 1771.72   57.09
  -1  -5   6 1805.82   57.59
   1   5  -6 1747.43   56.89
  -2  -5   6   38.40    3.40
  -2  -5   6   33.50    3.60
  -2  -5   6   40.70    3.80
   2   5  -6   40.50    3.40
  -3  -5   6   51.59    3.40
  -3  -5   6   44.70    4.10
  -3  -5   6   56.69    4.60
  -3  -5   6   49.80    4.90
   3   5  -6   50.09    4.20
  -4  -5   6   65.59    5.40
  -4  -5   6   57.89    4.00
  -4  -5   6   61.39    5.90
   4   5  -6   57.79    5.20
  -5  -5   6   80.99    4.80
   7  -5   7   21.10    1.90
  -7   5  -7   18.50    1.90
  -7   5  -7   18.80    1.80
  -7   5  -7   20.30    1.90
  -7   5  -7   23.00    1.90
  -7   5  -7   19.60    1.80
   6  -5   7   -1.50    1.50
  -6   5  -7   -2.30    1.50
  -6   5  -7    0.00    1.30
  -6   5  -7    1.90    1.70
  -6   5  -7   -0.40    1.50
  -6   5  -7   -0.80    1.40
  -5   5  -7   99.19    5.20
  -5   5  -7   99.29    5.50
  -5   5  -7   99.19    5.50
  -5   5  -7   95.09    5.60
  -5   5  -7   91.19    5.30
  -5   5  -7   95.59    5.30
  -5   5  -7   96.19    8.60
  -5   5  -7  100.79    5.30
  -5   5  -7  104.19    5.20
   4  -5   7  149.39    6.50
   4  -5   7  137.59    8.60
  -4   5  -7  132.19    9.40
  -4   5  -7  152.78    7.20
   3  -5   7  421.56   14.90
   3  -5   7  449.66   17.20
  -3   5  -7  434.36   15.50
  -3   5  -7  418.46   17.90
   2  -5   7  154.18    7.50
   2  -5   7  142.29    6.10
  -2   5  -7  160.08    8.40
   1  -5   7   51.29    2.90
   1  -5   7   61.39    4.30
   1  -5   7   50.89    3.90
  -1   5  -7   50.39    4.20
   0  -5   7  193.08    8.70
   0   5  -7  196.28    8.60
  -1  -5   7  492.15   18.00
  -1  -5   7  472.85   17.30
   1   5  -7  479.65   17.20
   1   5  -7  460.45   17.50
  -2  -5   7  153.68    8.10
  -2  -5   7  146.89    7.60
  -2  -5   7  161.78    6.60
   2   5  -7  153.58    7.40
   2   5  -7  154.08    8.00
  -3  -5   7  165.48    8.30
  -3  -5   7  190.78    9.70
  -3  -5   7  176.78    8.80
  -3  -5   7  171.28    7.30
   3   5  -7  162.18    8.80
   3   5  -7  161.68    8.10
  -4  -5   7    1.20    2.40
  -4  -5   7    1.60    2.30
  -4  -5   7   -1.90    1.30
   4   5  -7    4.50    2.50
  -5  -5   7  120.29    6.10
  -5  -5   7  107.49    6.20
  -5  -5   7  122.39    6.00
  -5  -5   7  113.09    5.90
  -5  -5   7  111.39    5.90
   6  -5   8   10.30    2.00
  -6   5  -8    5.50    1.70
  -6   5  -8    8.90    1.70
  -6   5  -8    8.30    1.70
  -6   5  -8    3.60    1.50
  -6   5  -8    5.50    1.70
   5  -5   8   25.70    2.80
  -5   5  -8   23.10    2.90
  -5   5  -8   24.70    2.80
  -5   5  -8   23.80    2.80
  -5   5  -8   25.80    3.00
  -5   5  -8   23.70    3.10
  -5   5  -8   31.20    3.10
   4  -5   8    6.00    2.00
   4  -5   8    6.60    1.80
  -4   5  -8    3.70    1.80
  -4   5  -8    7.80    2.00
  -4   5  -8    6.30    1.90
  -4   5  -8    5.90    3.60
  -4   5  -8    7.00    2.00
  -4   5  -8    3.90    1.90
  -4   5  -8    5.00    1.90
   3  -5   8   21.30    3.80
   3  -5   8   18.20    2.30
  -3   5  -8   23.00    2.80
  -3   5  -8   17.00    4.00
   2  -5   8  128.99    5.60
   2  -5   8  132.09    7.30
  -2   5  -8  127.29    8.00
   1  -5   8   25.80    2.50
   1  -5   8   32.30    3.80
   1  -5   8   37.20    4.20
  -1   5  -8   32.10    4.00
   0  -5   8   79.39    3.90
   0  -5   8   69.39    5.10
   0   5  -8   73.99    5.00
  -1  -5   8    8.10    2.20
  -1  -5   8    9.10    1.60
  -1  -5   8    5.00    1.60
  -1  -5   8    4.40    2.20
   1   5  -8    8.30    2.20
   1   5  -8    9.40    2.30
  -2  -5   8   17.50    3.00
  -2  -5   8   18.00    2.30
  -2  -5   8   25.50    4.20
   2   5  -8   20.80    3.40
   2   5  -8   17.20    3.00
  -3  -5   8    7.10    3.00
  -3  -5   8   11.70    2.10
  -3  -5   8   14.80    3.40
  -3  -5   8   11.60    2.90
   3   5  -8   18.10    3.50
   3   5  -8   11.20    2.70
  -4  -5   8  345.87   13.10
  -4  -5   8  345.67   15.10
  -4  -5   8  326.97   15.80
   4   5  -8  335.07   15.20
   4   5  -8  344.27   14.60
  -5  -5   8  115.29    5.80
  -5  -5   8  104.49    6.10
  -5  -5   8  110.19    5.90
  -5  -5   8  114.19    5.90
  -5  -5   8  103.29    5.70
  -6  -5   8    6.10    1.90
  -6  -5   8    9.40    2.60
  -6  -5   8    5.60    1.70
   6  -5   9    5.30    1.60
  -6   5  -9    6.20    1.50
  -6   5  -9    5.90    1.50
  -6   5  -9    6.40    1.40
   5  -5   9    2.50    1.70
   5  -5   9   -1.10    1.70
  -5   5  -9    1.30    1.70
  -5   5  -9   -0.10    1.50
  -5   5  -9   -0.30    1.50
  -5   5  -9    0.00    1.50
  -5   5  -9    2.20    1.60
  -5   5  -9    2.70    1.50
   4  -5   9    2.20    1.50
   4  -5   9   -0.30    1.60
  -4   5  -9    0.30    1.60
  -4   5  -9   -0.40    1.50
  -4   5  -9   -0.20    1.50
  -4   5  -9   -1.70    3.10
  -4   5  -9    0.30    1.50
  -4   5  -9    1.00    1.60
   3  -5   9   49.40    5.50
   3  -5   9   51.79    3.70
  -3   5  -9   53.99    6.60
  -3   5  -9   55.09    4.10
   2  -5   9   78.69    4.40
   2  -5   9   82.29    6.10
  -2   5  -9   81.39    4.70
  -2   5  -9   85.09    6.80
   1  -5   9  131.09    7.80
   1  -5   9  147.49    6.30
  -1   5  -9  150.08    8.30
   0  -5   9  157.88    6.70
   0  -5   9  169.88    8.70
   0   5  -9  171.88    8.60
  -1  -5   9   12.00    3.20
  -1  -5   9   12.00    1.80
  -1  -5   9   11.30    2.70
   1   5  -9   13.50    2.90
   1   5  -9   10.40    2.50
  -2  -5   9    8.70    2.90
  -2  -5   9    2.20    1.50
  -2  -5   9    3.60    2.10
   2   5  -9    5.60    2.10
   2   5  -9    8.50    2.80
  -3  -5   9   32.80    5.50
  -3  -5   9   31.20    2.90
  -3  -5   9   37.30    4.80
  -3  -5   9   35.00    3.40
   3   5  -9   36.90    4.50
   3   5  -9   44.20    5.60
  -4  -5   9   42.70    4.00
  -4  -5   9   37.20    3.90
  -4  -5   9   29.30    3.30
  -4  -5   9   38.60    3.80
  -4  -5   9   33.70    3.40
  -4  -5   9   39.90    3.20
  -4  -5   9   48.30    3.80
   4   5  -9   49.99    5.30
  -5  -5   9   97.99    5.80
  -5  -5   9   95.39    5.10
  -5  -5   9   89.29    5.10
  -5  -5   9   96.19    5.40
  -5  -5   9   80.09    5.20
  -6  -5   9   36.40    3.00
  -6  -5   9   36.70    3.00
  -6  -5   9   32.00    3.30
  -6  -5   9   34.40    3.00
   6  -5  10    8.00    1.40
  -6   5 -10    8.90    1.40
  -6   5 -10    9.60    1.30
   5  -5  10   21.50    2.40
   5  -5  10   25.10    2.70
  -5   5 -10   22.90    2.60
  -5   5 -10   27.40    2.60
  -5   5 -10   22.50    2.50
  -5   5 -10   26.30    2.50
  -5   5 -10   22.80    2.50
   4  -5  10   13.20    2.30
   4  -5  10    9.60    2.20
   4  -5  10    9.30    2.10
  -4   5 -10   11.00    2.20
  -4   5 -10   14.10    2.40
  -4   5 -10   10.60    2.20
  -4   5 -10    9.40    2.00
  -4   5 -10   10.70    2.20
   3  -5  10  108.69    5.50
   3  -5  10  105.59    5.50
   3  -5  10  106.99    5.70
  -3   5 -10  105.19    5.60
  -3   5 -10  101.49    5.70
  -3   5 -10  116.99    5.60
  -3   5 -10   87.79    7.90
  -3   5 -10   94.29    5.10
  -3   5 -10   96.89    5.50
   2  -5  10  247.88   12.10
   2  -5  10  279.77   10.30
  -2   5 -10  251.47   12.90
  -2   5 -10  261.67   10.40
   1  -5  10   75.39    4.30
  -1   5 -10   66.89    6.00
  -1   5 -10   66.89    4.20
   0  -5  10   56.59    3.80
   0   5 -10   53.49    3.60
   0   5 -10   63.79    5.40
  -1  -5  10  588.34   22.80
  -1  -5  10  592.54   20.10
  -1  -5  10  586.64   20.00
   1   5 -10  598.24   20.10
   1   5 -10  589.84   22.10
  -2  -5  10   70.19    6.00
  -2  -5  10   61.09    4.20
  -2  -5  10   69.39    6.30
  -2  -5  10   70.89    4.00
   2   5 -10   67.49    6.20
   2   5 -10   69.19    5.50
   2   5 -10   67.89    4.00
  -3  -5  10    6.90    3.20
  -3  -5  10    4.80    1.90
  -3  -5  10    3.00    1.40
  -3  -5  10    9.50    3.80
   3   5 -10    3.20    2.80
   3   5 -10    7.00    2.70
   3   5 -10    7.80    1.70
  -4  -5  10   15.90    2.20
  -4  -5  10   10.30    2.20
  -4  -5  10   17.30    2.10
  -4  -5  10   11.60    2.40
  -4  -5  10   15.50    2.80
  -4  -5  10   11.40    2.40
  -4  -5  10   10.70    2.20
  -4  -5  10   13.00    2.90
   4   5 -10   15.80    3.50
   4   5 -10   10.30    1.90
  -5  -5  10  150.88    6.80
  -5  -5  10  138.39    6.70
  -5  -5  10  150.18    7.00
  -5  -5  10  156.38    7.30
  -5  -5  10  150.18    7.10
  -5  -5  10  162.58    7.30
  -6  -5  10   62.79    3.60
  -6  -5  10   67.29    3.70
  -6  -5  10   70.09    3.90
  -6  -5  10   62.79    4.00
   5  -5  11    6.20    1.60
   5  -5  11    6.90    1.60
  -5   5 -11    7.90    1.50
  -5   5 -11    7.30    1.50
   4  -5  11   -2.00    1.30
   4  -5  11   -1.90    1.60
   4  -5  11   -1.10    1.50
  -4   5 -11    0.10    1.30
  -4   5 -11    1.00    1.60
  -4   5 -11    0.00    1.40
  -4   5 -11    0.20    1.50
  -4   5 -11    1.30    1.50
   3  -5  11   71.79    4.70
   3  -5  11   74.09    4.70
   3  -5  11   77.79    4.50
  -3   5 -11   69.69    4.60
  -3   5 -11   71.49    4.10
  -3   5 -11   66.29    4.30
  -3   5 -11   71.59    4.50
  -3   5 -11   73.39    4.70
  -3   5 -11   57.39    6.70
   2  -5  11   74.39    4.90
   2  -5  11   78.69    4.70
   2  -5  11   75.99    4.90
  -2   5 -11   78.89    4.80
  -2   5 -11   70.49    7.10
  -2   5 -11   78.99    5.00
  -2   5 -11   88.79    4.20
  -2   5 -11   80.29    4.50
   1  -5  11    9.90    2.00
  -1   5 -11    9.70    3.40
  -1   5 -11   16.30    2.40
   0  -5  11   10.50    2.10
   0   5 -11    3.10    2.50
   0   5 -11    7.10    1.70
  -1  -5  11   93.49    7.50
  -1  -5  11  102.89    5.30
  -1  -5  11  110.79    5.30
   1   5 -11  104.59    5.20
   1   5 -11  107.59    7.20
  -2  -5  11   30.70    3.10
  -2  -5  11   29.50    2.90
  -2  -5  11   31.20    5.10
   2   5 -11   34.00    4.60
   2   5 -11   29.30    2.80
   2   5 -11   23.40    4.20
  -3  -5  11  111.39    6.50
  -3  -5  11  111.59    6.00
  -3  -5  11  120.89    6.30
  -3  -5  11  104.09    7.40
  -3  -5  11  108.69    5.80
  -3  -5  11  113.19    5.90
  -3  -5  11  103.19    5.10
  -3  -5  11  113.89    5.70
  -3  -5  11  113.49    5.50
   3   5 -11  115.89    7.40
   3   5 -11  109.59    5.40
  -4  -5  11    9.90    2.50
  -4  -5  11    8.30    1.70
  -4  -5  11   11.30    1.90
  -4  -5  11   15.40    2.40
  -4  -5  11   10.40    2.50
  -4  -5  11    9.30    2.10
  -4  -5  11    7.60    2.20
  -4  -5  11   14.70    2.30
   4   5 -11    9.30    1.80
  -5  -5  11   10.60    2.20
  -5  -5  11   15.20    2.50
  -5  -5  11   16.80    2.30
  -5  -5  11   16.90    2.50
  -5  -5  11   15.20    2.40
  -5  -5  11   14.70    2.20
  -6  -5  11    2.70    1.20
  -6  -5  11    6.60    1.60
  -6  -5  11    4.40    1.50
  -6  -5  11    4.60    1.30
   5  -5  12   14.90    1.50
  -5   5 -12   13.20    1.30
  -5   5 -12   13.30    1.40
   4  -5  12   60.19    3.80
   4  -5  12   60.79    3.70
  -4   5 -12   60.99    3.30
  -4   5 -12   59.39    3.40
  -4   5 -12   64.09    3.60
  -4   5 -12   62.19    3.70
   3  -5  12    8.30    2.00
   3  -5  12    6.20    2.50
   3  -5  12    9.60    2.20
  -3   5 -12    4.10    1.80
  -3   5 -12   10.30    1.70
  -3   5 -12   10.80    2.10
   2  -5  12    2.90    1.80
   2  -5  12   -0.80    1.70
   2  -5  12    2.10    1.60
  -2   5 -12    4.00    3.00
  -2   5 -12    0.00    1.60
  -2   5 -12    2.50    1.60
  -2   5 -12    0.80    1.20
   1  -5  12   49.00    3.80
   1  -5  12   43.70    4.00
   1  -5  12   45.70    4.00
  -1   5 -12   44.10    3.70
  -1   5 -12   45.00    5.80
  -1   5 -12   45.60    3.50
   0  -5  12  440.46   15.40
   0  -5  12  442.26   15.80
   0  -5  12  419.56   15.20
   0  -5  12  458.25   15.70
   0  -5  12  395.06   15.90
   0   5 -12  442.76   18.30
   0   5 -12  472.25   15.90
   0   5 -12  433.26   15.40
  -1  -5  12   87.09    4.50
  -1  -5  12   82.19    5.20
  -1  -5  12   76.29    5.20
  -1  -5  12   89.89    4.80
   1   5 -12   79.59    6.60
   1   5 -12   83.89    4.50
   1   5 -12   90.39    4.80
  -2  -5  12   51.89    4.40
  -2  -5  12   58.79    4.70
  -2  -5  12   56.09    3.60
  -2  -5  12   56.09    3.80
  -2  -5  12   49.99    4.20
  -2  -5  12   48.60    3.90
   2   5 -12   48.90    5.60
   2   5 -12   54.29    3.70
   2   5 -12   55.49    3.60
  -3  -5  12    7.20    1.90
  -3  -5  12    4.50    1.60
  -3  -5  12    6.30    2.50
  -3  -5  12    6.70    2.40
  -3  -5  12    8.80    2.00
  -3  -5  12    6.80    2.00
  -3  -5  12    9.40    2.30
  -3  -5  12    7.40    2.00
  -3  -5  12    5.90    1.60
   3   5 -12    7.10    1.60
   3   5 -12    4.70    2.70
  -4  -5  12   36.80    2.80
  -4  -5  12   44.00    3.40
  -4  -5  12   36.10    3.30
  -4  -5  12   44.10    3.60
  -4  -5  12   37.90    3.70
  -4  -5  12   36.40    3.00
  -4  -5  12   36.90    3.30
  -4  -5  12   39.40    3.90
   4   5 -12   37.80    2.90
  -5  -5  12   30.80    2.80
  -5  -5  12   28.40    2.20
  -5  -5  12   32.40    3.10
  -5  -5  12   29.60    3.10
  -5  -5  12   30.20    2.70
  -5  -5  12   27.70    2.70
  -6  -5  12    1.40    1.00
  -6  -5  12   -0.40    1.00
  -6  -5  12   -0.70    0.90
  -6  -5  12    0.70    1.00
   4  -5  13   33.50    2.60
  -4   5 -13   26.80    1.80
   3  -5  13    1.60    1.50
   3  -5  13    2.90    1.70
  -3   5 -13    7.00    1.80
  -3   5 -13    5.40    1.60
  -3   5 -13    3.30    1.10
   2  -5  13    1.00    1.50
   2  -5  13    1.10    1.60
   2  -5  13   -0.70    1.50
  -2   5 -13    0.30    1.50
  -2   5 -13    2.00    1.50
   1  -5  13    1.60    1.70
   1  -5  13    4.10    1.90
   1  -5  13    3.40    1.90
   1  -5  13    2.10    1.20
  -1   5 -13    2.70    1.80
  -1   5 -13    5.00    1.60
   0  -5  13   19.20    2.30
   0  -5  13   21.30    2.40
   0  -5  13   21.10    2.90
   0  -5  13   17.70    2.60
   0  -5  13   17.50    2.40
   0   5 -13   21.80    4.10
   0   5 -13   21.10    2.70
   0   5 -13   21.90    2.50
  -1  -5  13   39.20    3.90
  -1  -5  13   41.50    3.30
  -1  -5  13   47.00    3.40
  -1  -5  13   46.20    4.00
   1   5 -13   42.30    3.40
   1   5 -13   45.20    3.30
  -2  -5  13  159.58    7.00
  -2  -5  13  153.18    6.50
  -2  -5  13  151.88    7.20
  -2  -5  13  159.78    7.50
  -2  -5  13  159.78    6.90
  -2  -5  13  152.98    7.10
   2   5 -13  159.08    6.60
   2   5 -13  147.89    6.80
  -3  -5  13  261.97   10.30
  -3  -5  13  274.67    9.90
  -3  -5  13  273.07   10.40
  -3  -5  13  288.67   10.70
  -3  -5  13  271.27   10.10
  -3  -5  13  265.97   10.00
  -3  -5  13  266.67   10.90
  -3  -5  13  266.57   10.50
   3   5 -13  272.27    9.90
   3   5 -13  260.57   10.10
  -4  -5  13   12.80    1.90
  -4  -5  13    7.20    1.50
  -4  -5  13   10.00    2.10
  -4  -5  13   14.30    2.20
  -4  -5  13    9.90    1.90
  -4  -5  13    9.70    1.70
  -4  -5  13   16.10    2.30
   4   5 -13   13.30    1.90
   4   5 -13   13.20    1.70
  -5  -5  13    0.60    0.90
  -5  -5  13    1.70    1.30
  -5  -5  13   -0.40    1.10
  -5  -5  13    1.50    1.20
  -5  -5  13   -0.10    1.20
  -5  -5  13   -0.60    1.10
   5   5 -13    0.80    1.00
   3  -5  14   16.60    1.90
   3  -5  14   12.90    1.90
  -3   5 -14   17.50    1.80
   2  -5  14    4.00    1.70
   2  -5  14    5.10    1.70
  -2   5 -14    3.40    1.60
  -2   5 -14    5.80    1.50
   1  -5  14    5.40    1.70
   1  -5  14    5.80    1.70
   1  -5  14    4.10    1.80
  -1   5 -14    4.40    1.60
  -1   5 -14    6.90    1.70
   0  -5  14   41.10    3.70
   0  -5  14   47.10    3.80
   0  -5  14   41.20    2.90
   0   5 -14   38.30    3.10
   0   5 -14   38.20    3.20
  -1  -5  14   35.30    3.00
  -1  -5  14   41.90    3.10
  -1  -5  14   35.80    3.60
  -1  -5  14   37.10    3.60
   1   5 -14   36.30    3.00
   1   5 -14   31.40    3.00
  -2  -5  14    2.40    1.70
  -2  -5  14    1.20    1.70
  -2  -5  14    3.10    1.50
  -2  -5  14    2.90    1.40
   2   5 -14    5.00    1.60
   2   5 -14    4.60    1.40
  -3  -5  14    3.70    1.70
  -3  -5  14    1.50    1.20
  -3  -5  14    1.90    1.40
  -3  -5  14    2.60    1.70
  -3  -5  14    5.10    1.50
   3   5 -14    1.10    1.20
   3   5 -14    3.30    1.30
  -4  -5  14    0.30    1.40
  -4  -5  14    2.70    1.30
  -4  -5  14   -0.50    1.10
  -4  -5  14    0.50    1.20
  -4  -5  14    2.20    1.10
  -4  -5  14    0.60    1.30
  -4  -5  14   -0.60    0.90
   4   5 -14    0.40    1.00
   4   5 -14    0.40    1.10
  -5  -5  14    2.50    1.00
  -5  -5  14    3.40    1.00
   3  -5  15    8.10    1.80
   2  -5  15    1.20    1.30
   2  -5  15   -0.80    1.20
  -2   5 -15    0.50    1.10
   1  -5  15   51.79    3.50
  -1   5 -15   47.10    3.30
  -1   5 -15   45.30    3.10
   0  -5  15   16.80    2.20
   0  -5  15   13.80    1.40
   0   5 -15   18.00    2.30
   0   5 -15   17.80    2.10
  -1  -5  15    5.50    1.70
  -1  -5  15    9.40    1.70
  -1  -5  15    7.90    1.80
  -1  -5  15    7.00    1.50
   1   5 -15    5.80    1.50
   1   5 -15    4.10    1.50
  -2  -5  15    1.50    1.20
  -2  -5  15    2.50    1.40
  -2  -5  15    3.70    1.50
  -2  -5  15    2.40    1.50
   2   5 -15    3.50    1.30
   2   5 -15    2.30    1.20
  -3  -5  15   39.10    2.80
  -3  -5  15   36.40    2.50
  -3  -5  15   34.60    2.40
  -3  -5  15   30.50    3.00
  -3  -5  15   42.20    3.70
   3   5 -15   36.50    2.40
   3   5 -15   26.90    2.40
  -4  -5  15    8.40    1.10
  -4  -5  15    7.60    1.30
  -4  -5  15   10.70    1.50
  -4  -5  15   11.70    1.40
   4   5 -15    8.40    1.20
   1  -5  16   -0.70    1.10
  -1   5 -16    2.30    1.00
   0  -5  16    1.00    1.30
   0   5 -16    0.30    1.00
  -1  -5  16    2.60    1.00
  -1  -5  16    2.10    1.30
  -1  -5  16    6.80    1.50
   1   5 -16    3.80    1.20
  -2  -5  16    3.70    1.30
  -2  -5  16    2.60    1.30
  -2  -5  16    6.60    1.30
   2   5 -16    6.80    1.30
  -3  -5  16   17.90    1.70
  -3  -5  16   19.90    1.80
   3   5 -16   19.60    1.80
  -2   6  16   31.80    2.50
  -2   6  16   30.00    2.50
   1  -6 -16   35.70    2.30
  -1   6  16   37.70    2.90
   0  -6 -16  101.89    4.30
   0   6  16  105.99    4.70
  -1  -6 -16    4.70    1.20
   1   6  16    6.50    1.30
  -4   6  15   13.10    1.60
  -4   6  15   17.10    1.70
  -3   6  15    4.50    1.40
  -3   6  15    0.80    1.10
   2  -6 -15    7.60    1.40
  -2   6  15    4.90    1.70
  -2   6  15    7.40    1.90
  -2   6  15    7.70    1.40
   1  -6 -15    7.30    1.50
  -1   6  15    4.50    1.10
  -1   6  15    4.20    1.80
  -1   6  15    1.70    1.50
   0  -6 -15   13.00    1.90
   0   6  15   11.10    2.00
  -1  -6 -15    1.60    1.20
   1   6  15    1.40    1.40
   1   6  15    1.00    1.40
  -2  -6 -15    6.10    1.50
   2   6  15    7.80    1.50
   2   6  15    5.80    1.40
  -4   6  14    8.90    1.70
  -4   6  14   10.80    1.40
  -4   6  14   13.50    1.80
   3  -6 -14    4.30    1.40
  -3   6  14    0.50    1.10
  -3   6  14    1.00    1.40
  -3   6  14    0.20    1.50
  -3   6  14    0.80    1.60
   2  -6 -14   11.80    1.80
  -2   6  14   11.40    2.20
  -2   6  14   10.30    1.80
  -2   6  14   13.60    2.50
   1  -6 -14   39.00    3.20
  -1   6  14   41.10    3.80
  -1   6  14   47.90    3.70
  -1   6  14   44.50    2.80
   0  -6 -14    7.80    1.80
   0   6  14    9.10    2.00
   1   6  14   21.00    2.50
   1   6  14   19.80    2.60
  -2  -6 -14   12.30    1.90
   2   6  14    8.40    1.80
   2   6  14   12.60    2.10
  -3  -6 -14   39.90    2.00
  -3  -6 -14   45.70    2.90
   3   6  14   40.20    3.00
  -5   6  13    0.20    1.00
  -5   6  13    0.30    1.20
  -5   6  13   -0.80    1.10
  -5   6  13   -0.10    0.90
  -5   6  13    1.30    1.20
   4  -6 -13   -0.30    1.10
  -4   6  13    1.80    1.40
  -4   6  13    2.20    1.70
  -4   6  13   -1.30    1.30
  -4   6  13    0.60    1.10
  -4   6  13    0.60    1.20
   3  -6 -13   21.50    2.30
   3  -6 -13   24.60    2.40
  -3   6  13   15.40    2.70
  -3   6  13   24.60    2.40
  -3   6  13   18.80    2.20
  -3   6  13   23.70    2.90
  -3   6  13   28.90    2.60
  -3   6  13   16.20    2.60
   2  -6 -13   55.49    3.50
  -2   6  13   45.90    3.40
  -2   6  13   43.40    3.90
  -2   6  13   49.50    4.20
  -2   6  13   46.30    4.00
   1  -6 -13    1.20    1.50
  -1   6  13    5.20    1.60
  -1   6  13    3.60    2.00
  -1   6  13    5.90    2.20
   0  -6 -13   49.60    3.60
   0   6  13   45.30    2.80
   0   6  13   46.00    4.10
  -1  -6 -13   81.99    4.60
  -1  -6 -13   76.09    3.40
   1   6  13   79.79    4.50
   1   6  13   76.89    4.70
  -2  -6 -13   17.90    1.90
  -2  -6 -13   18.70    2.40
   2   6  13   18.20    2.30
   2   6  13   15.00    2.30
  -3  -6 -13   48.20    3.40
  -3  -6 -13   46.10    2.80
   3   6  13   41.50    3.20
  -4  -6 -13   83.59    4.00
  -4  -6 -13   85.49    3.90
  -4  -6 -13   81.89    3.60
   4   6  13   82.89    3.90
   4   6  13   92.19    4.00
  -6   6  12   -0.30    0.70
  -6   6  12   -0.60    1.20
  -6   6  12    0.30    0.90
  -6   6  12   -0.50    0.90
  -5   6  12    0.60    1.40
  -5   6  12   -0.30    1.10
  -5   6  12    0.80    1.20
  -5   6  12    4.40    1.50
  -5   6  12    1.40    1.50
  -5   6  12    2.00    1.50
   4  -6 -12    4.40    1.50
  -4   6  12    6.10    2.10
  -4   6  12    4.80    1.60
  -4   6  12    4.00    1.60
  -4   6  12    2.40    1.80
  -4   6  12    2.10    1.40
  -4   6  12    5.10    1.70
  -4   6  12    3.80    1.50
  -4   6  12    5.90    1.90
   3  -6 -12   76.99    4.30
   3  -6 -12   77.69    4.30
  -3   6  12   76.59    4.30
  -3   6  12   76.69    4.10
  -3   6  12   87.79    5.50
  -3   6  12   76.99    4.30
  -3   6  12   70.89    5.00
  -3   6  12   71.89    4.90
   2  -6 -12   46.60    3.40
  -2   6  12   47.00    4.40
  -2   6  12   51.59    4.10
  -2   6  12   39.70    4.00
  -2   6  12   45.30    4.20
  -2   6  12   41.50    3.30
   1  -6 -12  124.99    5.90
  -1   6  12  121.89    6.50
  -1   6  12  125.29    5.70
  -1   6  12  125.09    6.70
   0  -6 -12   57.79    4.00
   0   6  12   61.39    4.40
   0   6  12   57.99    3.40
   0   6  12   55.19    4.50
  -1  -6 -12   73.69    4.60
  -1  -6 -12   78.79    4.60
  -1  -6 -12   80.89    3.90
   1   6  12   88.59    4.90
   1   6  12   86.29    4.70
  -2  -6 -12    8.70    1.90
  -2  -6 -12    3.20    1.40
  -2  -6 -12   10.00    2.10
   2   6  12    4.90    1.70
   2   6  12    7.00    1.90
  -3  -6 -12   19.90    2.80
  -3  -6 -12   20.70    2.40
  -3  -6 -12   26.40    2.70
  -3  -6 -12   22.10    2.60
  -3  -6 -12   21.50    2.20
   3   6  12   19.40    2.50
   3   6  12   20.30    2.40
  -4  -6 -12   11.30    1.90
  -4  -6 -12   10.30    1.70
  -4  -6 -12    9.70    1.70
  -4  -6 -12   14.30    1.80
   4   6  12   12.70    1.80
   4   6  12   11.50    1.80
  -5  -6 -12   12.40    1.50
  -5  -6 -12   10.90    1.50
  -5  -6 -12    8.60    1.20
   5   6  12   12.80    1.50
   5   6  12    8.80    1.80
  -6   6  11    0.80    1.20
  -6   6  11    1.10    1.00
  -6   6  11   -0.60    1.20
  -6   6  11   -0.90    1.10
   5  -6 -11   29.30    2.50
  -5   6  11   26.40    2.80
  -5   6  11   23.10    2.40
  -5   6  11   22.20    2.70
  -5   6  11   27.80    3.00
  -5   6  11   19.50    3.00
  -5   6  11   24.00    2.30
  -5   6  11   27.10    2.50
   4  -6 -11    3.00    1.50
  -4   6  11    5.10    1.90
  -4   6  11    0.30    1.80
  -4   6  11    2.70    1.60
  -4   6  11    3.20    1.90
  -4   6  11    1.50    2.00
  -4   6  11    2.10    1.50
  -4   6  11    2.90    1.50
  -4   6  11    0.40    1.90
   3  -6 -11  456.25   18.80
   3  -6 -11  455.05   16.60
  -3   6  11  483.85   19.20
  -3   6  11  488.55   17.90
  -3   6  11  476.95   17.50
  -3   6  11  475.05   16.60
  -3   6  11  486.85   16.80
  -3   6  11  496.65   17.70
  -3   6  11  473.35   16.40
   2  -6 -11  452.25   23.00
   2  -6 -11  400.16   14.30
   2  -6 -11  378.16   19.40
  -2   6  11  399.66   14.50
  -2   6  11  402.76   15.00
  -2   6  11  399.36   14.30
  -2   6  11  383.56   22.80
  -2   6  11  393.66   14.80
  -2   6  11  406.16   15.10
  -2   6  11  406.16   15.30
   1  -6 -11   30.70    4.60
  -1   6  11   31.20    5.00
   0  -6 -11   60.19    5.80
   0   6  11   54.69    6.30
  -1  -6 -11  330.47   12.20
  -1  -6 -11  330.87   13.10
   1   6  11  310.57   14.60
   1   6  11  341.57   13.20
   1   6  11  309.07   12.40
  -2  -6 -11    1.20    1.40
  -2  -6 -11   -0.20    1.50
  -2  -6 -11    3.80    1.50
  -2  -6 -11    4.10    1.60
   2   6  11    0.60    1.60
   2   6  11   -1.30    1.80
  -3  -6 -11  179.98    7.90
  -3  -6 -11  193.58    8.00
  -3  -6 -11  190.08    7.70
  -3  -6 -11  185.38    7.90
  -3  -6 -11  180.48    7.50
   3   6  11  180.58    7.70
   3   6  11  196.38    7.90
   3   6  11  169.28    9.10
  -4  -6 -11   33.10    3.20
  -4  -6 -11   38.40    3.20
  -4  -6 -11   34.10    3.10
  -4  -6 -11   36.70    3.30
   4   6  11   29.90    2.90
   4   6  11   38.60    3.30
  -5  -6 -11   62.99    3.60
  -5  -6 -11   61.79    3.50
  -5  -6 -11   61.59    3.30
  -5  -6 -11   52.49    3.90
  -5  -6 -11   58.19    3.40
   5   6  11   58.59    3.40
   5   6  11   60.19    3.20
  -6   6  10   44.80    3.10
  -6   6  10   45.70    2.90
  -6   6  10   44.30    3.10
  -6   6  10   45.50    3.30
  -6   6  10   43.10    3.20
  -5   6  10   53.19    3.60
  -5   6  10   46.00    3.40
  -5   6  10   48.80    4.00
  -5   6  10   42.20    3.80
  -5   6  10   47.90    3.30
  -5   6  10   45.70    3.90
  -5   6  10   49.10    4.00
   4  -6 -10  119.29    7.90
  -4   6  10  108.19    5.50
  -4   6  10  121.79    6.20
  -4   6  10  113.09    6.40
  -4   6  10  119.19    6.50
  -4   6  10  116.89    5.70
  -4   6  10  106.29    7.80
  -4   6  10  112.09    6.10
  -4   6  10  111.49    6.50
  -4   6  10  112.49    5.40
   3  -6 -10  182.58    9.10
   3  -6 -10  183.28   10.00
   3  -6 -10  175.98   10.20
  -3   6  10  204.18   10.00
  -3   6  10  185.28   10.20
  -3   6  10  193.38    9.00
  -3   6  10  193.48    9.10
  -3   6  10  199.98   11.60
  -3   6  10  217.08    9.00
  -3   6  10  204.28    8.10
   2  -6 -10    2.20    2.20
   2  -6 -10   -1.70    2.00
  -2   6  10    4.30    2.90
  -2   6  10   -0.40    1.60
  -2   6  10    0.70    1.30
  -2   6  10    4.00    2.50
   1  -6 -10   73.29    6.00
  -1   6  10   75.49    6.30
  -1   6  10   76.09    4.60
   0  -6 -10    7.80    2.90
   0   6  10   14.40    3.30
   0   6  10    9.80    3.10
   1   6  10  286.07   13.30
   1   6  10  295.27   13.10
   2   6  10  130.89    8.40
   2   6  10  149.79    6.40
   2   6  10  124.29    8.20
  -3  -6 -10   17.10    2.40
  -3  -6 -10   16.10    2.60
  -3  -6 -10   14.60    2.50
  -3  -6 -10   19.20    2.60
  -3  -6 -10   19.80    2.50
   3   6  10   22.40    2.90
   3   6  10   18.00    4.30
   3   6  10   12.40    2.30
  -4  -6 -10    4.50    1.70
  -4  -6 -10    0.80    1.60
  -4  -6 -10    1.70    1.60
  -4  -6 -10   -0.40    1.50
  -4  -6 -10    0.80    1.60
   4   6  10    0.10    1.60
   4   6  10    2.80    1.70
  -5  -6 -10   10.00    1.90
  -5  -6 -10    8.70    1.80
  -5  -6 -10    8.10    1.60
  -5  -6 -10    6.90    1.70
  -5  -6 -10   10.00    1.80
  -5  -6 -10    9.60    1.90
   5   6  10   11.30    1.80
  -6  -6 -10    9.60    1.40
  -6  -6 -10   11.00    1.40
   6   6  10   11.80    1.50
  -7   6   9   23.40    1.80
  -7   6   9   22.00    2.00
  -7   6   9   23.30    2.00
  -6   6   9   -1.30    1.40
  -6   6   9    0.60    1.20
  -6   6   9    0.80    1.60
  -6   6   9   -2.00    1.40
  -6   6   9    0.50    1.30
  -6   6   9    0.10    1.20
  -5   6   9  213.28    9.10
  -5   6   9  219.78    8.50
  -5   6   9  209.28    8.40
  -5   6   9  212.18    8.70
  -5   6   9  205.58    9.00
  -5   6   9  202.48    9.10
  -5   6   9  206.48    9.20
   4  -6  -9   77.79    6.50
  -4   6   9   74.59    5.00
  -4   6   9   70.99    6.40
  -4   6   9   71.29    4.40
  -4   6   9   72.39    4.30
  -4   6   9   71.99    4.40
  -4   6   9   69.99    5.70
  -4   6   9   60.69    4.80
  -4   6   9   69.09    4.90
  -4   6   9   68.69    4.90
   3  -6  -9   27.00    4.30
   3  -6  -9   33.80    4.70
   3  -6  -9   26.60    4.60
  -3   6   9   27.90    5.00
  -3   6   9   26.60    4.20
  -3   6   9   25.00    2.70
  -3   6   9   31.20    3.50
  -3   6   9   30.00    5.20
   2  -6  -9   73.09    5.50
   2  -6  -9   60.69    5.50
  -2   6   9   55.89    4.00
  -2   6   9   61.69    5.20
  -2   6   9   50.49    5.90
  -2   6   9   48.80    3.70
   1  -6  -9  207.58    9.90
  -1   6   9  192.28    8.10
  -1   6   9  192.98    9.70
  -1   6   9  197.98   10.10
   0  -6  -9   17.80    3.20
   0   6   9   13.90    3.40
   0   6   9   14.50    3.30
   1   6   9   13.80    3.40
   1   6   9   10.90    3.00
  -2  -6  -9    9.10    2.00
  -2  -6  -9    8.30    1.70
   2   6   9    7.40    3.00
   2   6   9    8.90    1.90
   2   6   9    7.70    2.90
  -3  -6  -9   39.20    3.80
  -3  -6  -9   41.00    5.30
  -3  -6  -9   37.10    3.90
  -3  -6  -9   42.20    4.50
  -3  -6  -9   36.00    3.40
  -3  -6  -9   35.90    3.40
   3   6   9   42.30    5.10
   3   6   9   41.90    3.50
   3   6   9   43.10    5.50
  -4  -6  -9   12.50    2.30
  -4  -6  -9   16.60    2.40
  -4  -6  -9   13.40    2.30
  -4  -6  -9   16.80    2.30
  -4  -6  -9   18.90    2.50
  -4  -6  -9   17.20    2.50
  -4  -6  -9   18.70    2.80
  -4  -6  -9   13.90    2.60
   4   6   9   12.80    2.30
   4   6   9   15.10    2.60
  -5  -6  -9    7.70    1.90
  -5  -6  -9    4.20    1.80
  -5  -6  -9    5.20    1.80
  -5  -6  -9    5.30    1.80
  -5  -6  -9    7.00    1.80
  -5  -6  -9    7.40    1.80
  -5  -6  -9    5.60    1.80
   5   6   9    5.20    1.70
   5   6   9    3.60    1.60
  -6  -6  -9    5.70    1.60
  -6  -6  -9    8.80    1.60
  -6  -6  -9    8.20    1.60
  -6  -6  -9    8.70    1.60
  -6  -6  -9    7.00    1.40
  -6  -6  -9    6.60    1.50
   6   6   9    9.20    1.60
  -7   6   8   32.00    2.60
  -7   6   8   31.20    2.40
  -7   6   8   30.10    2.20
  -6   6   8    3.20    1.50
  -6   6   8    1.80    1.50
  -6   6   8    3.10    1.50
  -6   6   8    2.80    1.70
  -6   6   8   -0.20    1.70
   5  -6  -8  143.79    8.90
  -5   6   8  134.19    6.40
  -5   6   8  134.79    6.10
  -5   6   8  134.69    6.90
  -5   6   8  137.09    6.20
  -5   6   8  140.09    7.10
  -5   6   8  135.79    6.90
  -5   6   8  127.99    6.80
  -5   6   8  133.19    8.60
   4  -6  -8    7.00    3.20
   4  -6  -8    1.20    2.60
  -4   6   8   12.70    3.80
  -4   6   8    2.50    2.90
  -4   6   8   11.00    2.40
  -4   6   8    9.80    2.00
  -4   6   8    9.30    3.10
   3  -6  -8  155.08    8.60
   3  -6  -8  151.78    9.20
   3  -6  -8  166.98    8.80
  -3   6   8  157.98    8.70
  -3   6   8  169.68    9.30
  -3   6   8  149.49    6.70
  -3   6   8  156.68    9.60
  -3   6   8  167.58    7.40
   2  -6  -8   12.60    2.60
   2  -6  -8   27.20    3.70
  -2   6   8   23.60    2.80
  -2   6   8   11.80    5.20
  -2   6   8   19.00    3.10
  -2   6   8   22.40    3.80
  -2   6   8   30.80    4.70
   1  -6  -8    2.30    1.80
  -1   6   8    1.70    2.20
  -1   6   8   -0.10    1.60
  -1   6   8    1.80    1.30
   0  -6  -8    3.20    1.90
   0   6   8    8.90    2.30
   0   6   8    7.50    2.30
  -1  -6  -8   89.49    5.90
   1   6   8   92.99    5.90
   1   6   8   96.99    6.00
  -2  -6  -8  376.96   13.30
  -2  -6  -8  365.16   13.20
   2   6   8  355.76   15.00
   2   6   8  377.76   13.20
   2   6   8  399.86   15.50
  -3  -6  -8   55.19    7.90
  -3  -6  -8   51.99    3.80
  -3  -6  -8   54.29    3.70
   3   6   8   53.89    6.00
   3   6   8   46.70    5.30
   3   6   8   55.19    3.90
  -4  -6  -8   94.39    5.70
  -4  -6  -8  112.69    5.60
  -4  -6  -8  116.29    5.60
  -4  -6  -8  119.59    5.90
  -4  -6  -8  103.09    5.80
  -4  -6  -8  102.99    5.90
  -4  -6  -8  118.19    6.00
  -4  -6  -8  103.99    5.70
   4   6   8   97.99    5.50
  -5  -6  -8   83.49    5.20
  -5  -6  -8   95.89    5.00
  -5  -6  -8   94.79    5.30
  -5  -6  -8   94.49    5.20
  -5  -6  -8   83.89    4.90
  -5  -6  -8   86.89    5.00
  -5  -6  -8   94.89    4.80
  -5  -6  -8   91.99    5.10
  -5  -6  -8   90.39    5.10
   5   6   8   95.69    5.00
   5   6   8   90.29    5.00
  -6  -6  -8   56.59    3.80
  -6  -6  -8   56.49    3.60
  -6  -6  -8   58.29    3.70
  -6  -6  -8   55.29    3.60
  -6  -6  -8   53.09    3.50
  -6  -6  -8   61.69    3.70
  -7   6   7    0.30    1.10
  -7   6   7    0.60    1.30
  -7   6   7   -0.40    1.20
  -7   6   7    0.00    1.10
  -6   6   7   14.20    2.10
  -6   6   7   14.20    2.00
  -6   6   7   16.10    2.30
  -6   6   7   20.00    2.80
  -6   6   7   16.30    2.60
  -5   6   7   61.39    4.00
  -5   6   7   61.69    4.20
  -5   6   7   67.89    4.00
  -5   6   7   54.69    5.00
  -5   6   7   62.39    4.70
  -5   6   7   66.69    4.90
  -5   6   7   73.19    6.60
  -5   6   7   67.19    5.00
   4  -6  -7   10.50    3.50
  -4   6   7   11.00    2.30
  -4   6   7   10.20    3.20
  -4   6   7   11.60    3.20
  -4   6   7   11.20    2.00
  -4   6   7   16.00    4.00
   3  -6  -7    2.90    1.90
   3  -6  -7    3.80    2.20
  -3   6   7    0.90    2.20
  -3   6   7    5.30    2.40
  -3   6   7    2.70    2.30
  -3   6   7    3.00    2.60
  -3   6   7    2.50    1.60
   2  -6  -7  314.37   12.90
   2  -6  -7  300.67   12.60
  -2   6   7  311.07   11.50
  -2   6   7  300.87   12.50
  -2   6   7  305.17   13.00
  -2   6   7  333.17   13.40
  -2   6   7  323.07   13.50
   1  -6  -7    1.90    1.70
   1  -6  -7   -0.40    1.20
  -1   6   7    2.10    1.70
  -1   6   7   -0.20    1.40
  -1   6   7   -0.60    1.60
   0  -6  -7  308.57   12.50
   0   6   7  301.77   12.40
   0   6   7  316.37   12.40
  -1  -6  -7  515.45   19.10
   1   6   7  528.45   19.10
   1   6   7  517.25   19.00
  -2  -6  -7    2.30    1.20
  -2  -6  -7    0.40    1.00
  -2  -6  -7    3.70    1.90
   2   6   7    2.00    2.10
   2   6   7    1.50    1.80
   2   6   7    0.60    1.10
   2   6   7    1.30    1.60
  -3  -6  -7   -2.10    1.10
  -3  -6  -7    0.20    2.10
  -3  -6  -7   -0.50    1.10
   3   6   7    0.80    2.40
   3   6   7   -0.10    2.30
   3   6   7    0.00    2.00
   3   6   7    1.90    1.40
  -4  -6  -7  133.29    9.10
  -4  -6  -7  153.58    6.90
  -4  -6  -7  150.78    7.10
   4   6   7  165.58    7.00
   4   6   7  142.79    9.40
   4   6   7  151.88    9.20
  -5  -6  -7   32.20    3.40
  -5  -6  -7   31.00    3.10
  -5  -6  -7   26.80    3.10
  -5  -6  -7   33.00    3.30
  -5  -6  -7   26.90    3.00
  -5  -6  -7   29.60    2.90
  -5  -6  -7   27.80    3.30
  -5  -6  -7   27.30    3.20
  -5  -6  -7   28.80    3.20
   5   6   7   27.70    3.10
  -6  -6  -7   27.50    3.00
  -6  -6  -7   31.30    3.10
  -6  -6  -7   27.70    2.90
  -6  -6  -7   27.60    2.80
  -6  -6  -7   31.50    3.10
  -6  -6  -7   23.00    2.60
  -7  -6  -7   -0.70    1.00
  -7  -6  -7    1.00    1.10
  -7  -6  -7   -1.00    1.00
  -7  -6  -7   -0.20    1.00
  -7   6   6    0.50    1.20
  -7   6   6   -0.60    1.10
  -7   6   6    0.40    1.20
  -7   6   6   -0.10    1.30
  -6   6   6    2.10    1.90
  -6   6   6    0.10    1.50
  -6   6   6    1.20    1.40
  -6   6   6    1.60    1.90
  -6   6   6    1.20    1.40
  -5   6   6    2.00    1.50
  -5   6   6    1.80    2.70
  -5   6   6    0.90    1.60
  -5   6   6    2.90    2.20
  -5   6   6   -0.80    1.80
  -5   6   6    0.30    1.40
   4  -6  -6   22.50    4.20
  -4   6   6   22.10    3.90
  -4   6   6   21.80    4.30
  -4   6   6   16.40    3.50
  -4   6   6   22.00    2.50
  -4   6   6   26.00    3.10
  -4   6   6   29.40    4.60
   3  -6  -6   29.10    3.70
   3  -6  -6   36.20    4.80
  -3   6   6   35.60    4.30
  -3   6   6   38.20    5.00
  -3   6   6   36.30    4.70
  -3   6   6   36.20    3.10
  -3   6   6   33.30    4.40
   2  -6  -6   86.89    5.30
   2  -6  -6   91.99    5.70
  -2   6   6   97.09    5.80
  -2   6   6   99.89    5.80
  -2   6   6   80.29    5.50
  -2   6   6   91.79    5.30
  -2   6   6   84.29    5.60
   1  -6  -6   18.50    2.60
   1  -6  -6   11.70    2.30
  -1   6   6   12.90    2.20
  -1   6   6   13.50    2.50
  -1   6   6   15.50    2.50
   0  -6  -6  310.87   12.10
   0   6   6  297.57   11.90
   0   6   6  318.87   12.00
  -1  -6  -6   89.79    5.20
   1   6   6   78.09    5.00
   1   6   6   90.89    5.20
   1   6   6   89.09    5.00
  -2  -6  -6   35.60    2.70
  -2  -6  -6   41.10    4.10
  -2  -6  -6   37.10    2.60
   2   6   6   42.70    3.60
   2   6   6   39.30    4.10
   2   6   6   48.00    4.20
  -3  -6  -6   52.59    3.30
  -3  -6  -6   59.39    5.00
  -3  -6  -6   48.20    3.40
   3   6   6   54.69    5.10
   3   6   6   47.90    4.40
   3   6   6   57.19    4.90
  -4  -6  -6   53.09    5.60
  -4  -6  -6   41.70    3.70
  -4  -6  -6   41.40    3.40
   4   6   6   34.90    4.80
   4   6   6   40.00    3.40
   4   6   6   39.30    5.70
  -5  -6  -6   58.69    4.30
  -5  -6  -6   53.79    4.20
  -5  -6  -6   62.89    4.10
  -5  -6  -6   56.79    4.20
  -5  -6  -6   49.60    4.40
  -5  -6  -6   64.59    4.70
  -5  -6  -6   58.59    4.00
  -5  -6  -6   61.89    4.30
  -5  -6  -6   65.49    4.60
   5   6   6   60.19    4.00
  -6  -6  -6   57.29    4.10
  -6  -6  -6   56.39    4.30
  -6  -6  -6   56.19    4.10
  -6  -6  -6   50.29    3.70
  -6  -6  -6   64.79    4.10
  -6  -6  -6   61.59    4.20
  -6  -6  -6   61.69    4.10
  -6  -6  -6   60.99    4.10
   6   6   6   59.39    3.80
  -7  -6  -6    1.90    1.30
  -7  -6  -6   -1.40    1.10
  -7  -6  -6   -0.80    1.10
  -7  -6  -6   -0.60    1.20
  -7  -6  -6    2.30    1.20
  -7   6   5   39.20    2.80
  -7   6   5   36.70    2.70
  -7   6   5   32.50    2.80
  -7   6   5   32.20    3.10
  -6   6   5  120.49    5.70
  -6   6   5  121.09    5.70
  -6   6   5  115.59    8.30
  -6   6   5  124.09    6.70
  -6   6   5  122.59    6.00
   5  -6  -5   34.90    5.40
  -5   6   5   36.90    5.30
  -5   6   5   34.80    3.30
  -5   6   5   30.40    5.00
  -5   6   5   33.20    5.10
  -5   6   5   39.30    5.50
   4  -6  -5    7.90    3.00
  -4   6   5   11.70    3.30
  -4   6   5    8.10    2.80
  -4   6   5   11.30    3.00
  -4   6   5    8.20    2.00
  -4   6   5   10.20    3.10
   3  -6  -5  117.79    7.20
   3  -6  -5  123.09    6.40
  -3   6   5  119.19    6.80
  -3   6   5  118.69    7.00
  -3   6   5  123.69    7.10
  -3   6   5  123.09    5.60
  -3   6   5  118.19    7.00
   2  -6  -5   21.20    3.00
   2  -6  -5   22.10    2.70
  -2   6   5   22.20    3.30
  -2   6   5   21.40    2.90
  -2   6   5   17.20    2.80
  -2   6   5   20.70    3.30
[truncated: 800,113 more chars]
